# Supplementary material for: Genetic Screen Identified Prmt5 as a Neuroprotection Target against Cerebral Ischemia
Source: bioRxiv preprint, doi:10.1101/2023.06.26.546470, version 4 (2023-12-12)
Supplement: Table S2 [file 546470_file08.xlsx]

## Sheet: GenomeOccupancy
	Peaks	%
TSS	9051	0.563539
Gene body	4797	0.298674
Intergenic	2213	0.137787

## Sheet: PRMT5-ChIPseq
chrom	start	end	ChIP_island_read_count	CONTROL_island_read_count	p_value	fold_change	FDR_threshold	closest_TSS	location_relative_to_TSS	region	PRMT5 Bound Genes			Total Bound Genes
chr1	4491800	4494799	105	47	4.68406e-15	2.35097	2.858e-14	Gm37587	-3251	gene_body	TRUE			5448
chr1	4785000	4786199	82	24	2.26337e-22	3.59549	2.25777e-21	Mrpl15	138	TSS	TRUE
chr1	4857600	4858799	97	15	9.73525e-48	6.80512	3.21224e-46	Tcea1	385	TSS	TRUE
chr1	6213200	6216399	111	55	5.15827e-13	2.12381	2.68168e-12	Rb1cc1	154	TSS	TRUE
chr1	7397400	7399999	353	34	1.07112e-230	10.9257	6.28597e-228	Gm26901	-899	TSS	TRUE
chr1	9542400	9546999	229	99	2.3994e-32	2.43419	4.13359e-31	Rrs1	-708	TSS	TRUE
chr1	9699400	9701399	83	42	8.12752e-10	2.07962	3.13274e-09	Mybl1	-191	TSS	TRUE
chr1	9943800	9944799	54	14	1.13287e-17	4.05902	8.3825e-17	Snhg6	-182	TSS	TRUE
chr1	9966400	9969599	103	53	2.60216e-11	2.04511	1.16428e-10	Tcf24	-68	TSS	TRUE
chr1	10037400	10040999	167	58	2.32234e-34	3.03001	4.44104e-33	Cspp1	982	TSS	TRUE
chr1	10231600	10233799	85	35	1.83351e-14	2.55568	1.06969e-13	Arfgef1	-30	TSS	TRUE
chr1	13371200	13374799	224	38	5.7464e-99	6.20325	7.17316e-97	Ncoa2	1082	TSS	TRUE
chr1	13659800	13660999	61	28	3.40205e-09	2.29259	1.22593e-08	Lactb2	145	TSS	TRUE
chr1	15805000	15806599	113	24	4.01838e-42	4.95476	1.07764e-40	Terf1	153	TSS	TRUE
chr1	16102600	16106799	195	68	1.70741e-39	3.01773	4.10615e-38	Rpl7	-38	TSS	TRUE
chr1	16618000	16619799	77	35	2.78912e-11	2.31514	1.24344e-10	Gm38342	339	TSS	TRUE
chr1	16655000	16657999	96	42	1.64038e-14	2.40534	9.61982e-14	Tceb1	383	TSS	TRUE
chr1	16664200	16667199	89	45	2.10911e-10	2.08129	8.64654e-10	Tmem70	489	TSS	TRUE
chr1	20819600	20820599	103	13	1.66893e-58	8.33775	7.9052e-57	Mcm3	211	TSS	TRUE
chr1	23255600	23258399	133	37	5.39111e-37	3.78273	1.16729e-35	Gm6420	-593	TSS	TRUE
chr1	23762000	23763599	67	35	8.55072e-08	2.01447	2.60995e-07	B3gat2	873	gene_body	TRUE
chr1	24005200	24007199	68	21	8.89866e-18	3.40757	6.62677e-17	Sdhaf4	-544	TSS	TRUE
chr1	24097400	24100799	80	39	3.02811e-10	2.15864	1.22283e-09	Fam135a	1093	TSS	TRUE
chr1	24677400	24679799	83	30	3.10533e-17	2.91147	2.2233e-16	Lmbrd1	-326	TSS	TRUE
chr1	30949000	30950399	64	21	1.19244e-15	3.20712	7.5973e-15	Ptp4a1	69	TSS	TRUE
chr1	33719800	33722799	104	34	3.71976e-24	3.21891	4.12285e-23	Rab23	1404	TSS	TRUE
chr1	33813600	33814799	63	22	3.03057e-14	3.01351	1.73612e-13	Zfp451	326	TSS	TRUE
chr1	34438400	34440799	237	46	5.20427e-93	5.42183	5.93865e-91	Imp4	-251	TSS	TRUE
chr1	36243200	36244799	71	27	5.24411e-14	2.76726	2.95401e-13	Uggt1	304	TSS	TRUE
chr1	36303200	36312599	339	166	2.27917e-36	2.14905	4.79699e-35	Arid5a	145	TSS	TRUE
chr1	36366600	36369599	123	56	9.51353e-17	2.31138	6.56733e-16	Kansl3	1080	TSS	TRUE
chr1	36444600	36446399	105	33	1.21832e-25	3.34835	1.46496e-24	Lman2l	-229	TSS	TRUE
chr1	36509400	36513199	214	58	7.91847e-60	3.88276	3.90633e-58	Cnnm3	-567	TSS	TRUE
chr1	36545400	36548199	190	44	2.2327e-63	4.54418	1.23038e-61	Ankrd39	418	TSS	TRUE
chr1	36549200	36563399	599	302	1.80409e-58	2.08725	8.51865e-57	Sema4c	2048	TSS	TRUE
chr1	36689600	36692599	145	52	8.88914e-29	2.9344	1.27437e-27	Cox5b	-384	TSS	TRUE
chr1	36705000	36710199	229	98	5.96658e-33	2.45903	1.05567e-31	Actr1b	6821	gene_body	TRUE
chr1	36939400	36940799	129	24	8.21965e-54	5.65631	3.35528e-52	Tmem131	-278	TSS	TRUE
chr1	37299800	37302399	104	49	1.37127e-13	2.23353	7.47241e-13	Inpp4a	1208	TSS	TRUE
chr1	37429200	37431399	131	40	1.37017e-32	3.44641	2.38641e-31	Unc50	129	TSS	TRUE
chr1	37863800	37866399	178	39	6.19387e-63	4.80298	3.3681e-61	Tsga10	-21	TSS	TRUE
chr1	37871400	37872799	75	16	1.1117e-28	4.93283	1.58697e-27	Lipt1	-106	TSS	TRUE
chr1	37995000	37999799	132	64	8.93287e-16	2.17045	5.74439e-15	Txndc9	-85	TSS	TRUE
chr1	38987200	38988599	82	33	1.52739e-14	2.6149	8.98227e-14	Pdcl3	2291	gene_body	TRUE
chr1	39367600	39371599	147	57	7.15465e-26	2.71392	8.73324e-25	Rpl31	1757	TSS	TRUE
chr1	39477200	39480799	100	47	3.31848e-13	2.23902	1.7552e-12	Tbc1d8	-245	TSS	TRUE
chr1	39534000	39536199	98	39	2.8613e-17	2.64434	2.05265e-16	Cnot11	107	TSS	TRUE
chr1	39576400	39577999	66	21	1.06064e-16	3.30735	7.29781e-16	Rnf149	204	TSS	TRUE
chr1	40789200	40790999	70	22	7.55159e-18	3.34835	5.65624e-17	Mfsd9	586	TSS	TRUE
chr1	42694000	42696799	86	27	1.92069e-21	3.35189	1.79918e-20	Pou3f3	-368	TSS	TRUE
chr1	42850600	42852799	83	35	1.22902e-13	2.49554	6.72729e-13	Mrps9	466	TSS	TRUE
chr1	43091000	43093399	76	32	1.08359e-12	2.4993	5.48508e-12	8430432A02Rik	-388	TSS	TRUE
chr1	43097600	43099599	114	39	1.07081e-24	3.07606	1.22099e-23	Tgfbrap1	21	TSS	TRUE
chr1	43826600	43829199	141	40	3.48242e-38	3.70949	7.94564e-37	Uxs1	-100	TSS	TRUE
chr1	43933400	43935199	132	32	9.35833e-43	4.34089	2.57386e-41	Tpp2	284	TSS	TRUE
chr1	44101800	44103599	71	17	2.00681e-24	4.39506	2.2533e-23	Tex30	-262	TSS	TRUE
chr1	44118400	44120799	79	38	2.1195e-10	2.18775	8.686e-10	Bivm	437	TSS	TRUE
chr1	44147000	44148399	73	25	1.36581e-16	3.07283	9.31809e-16	Ercc5	-147	TSS	TRUE
chr1	44550400	44552599	102	35	3.04381e-22	3.06681	3.00577e-21	Gulp1	-11	TSS	TRUE
chr1	45794800	45796399	77	21	6.46017e-23	3.85857	6.6113e-22	Wdr75	433	TSS	TRUE
chr1	46852600	46854999	72	28	1.02613e-13	2.70601	5.65678e-13	Gm28151	-3321	gene_body	TRUE
chr1	51477800	51480199	163	34	1.18889e-60	5.04503	6.07044e-59	Nabp1	-601	TSS	TRUE
chr1	51915000	51916399	77	20	3.65858e-24	4.0515	4.05753e-23	Myo1b	370	TSS	TRUE
chr1	52118400	52120599	94	34	3.28932e-19	2.9094	2.68445e-18	Stat1	44	TSS	TRUE
chr1	52231000	52234199	390	44	2.45761e-230	9.32754	1.42377e-227	Gls	622	TSS	TRUE
chr1	52630000	52632199	72	26	2.95382e-15	2.91417	1.83259e-14	Nemp2	396	TSS	TRUE
chr1	52815400	52818399	95	49	1.56299e-10	2.04025	6.48862e-10	Inpp1	787	TSS	TRUE
chr1	52844200	52845999	76	39	6.67948e-09	2.05071	2.33409e-08	Hibch	86	TSS	TRUE
chr1	53296600	53298199	102	27	1.35695e-30	3.9755	2.14436e-29	Ormdl1	304	TSS	TRUE
chr1	53351400	53353799	77	31	8.94064e-14	2.61387	4.95566e-13	Asnsd1	66	TSS	TRUE
chr1	54438200	54439199	59	15	1.73988e-19	4.13919	1.44512e-18	Gtf3c3	270	TSS	TRUE
chr1	55025200	55028199	121	48	6.37766e-21	2.65277	5.79983e-20	Sf3b1	780	TSS	TRUE
chr1	55051400	55057199	248	114	5.4889e-31	2.2893	8.86146e-30	E330011M16Rik	-1188	TSS	TRUE
chr1	55086200	55088599	123	48	8.61998e-22	2.69661	8.29824e-21	Hspd1	623	TSS	TRUE
chr1	55130800	55131799	55	13	1.06848e-19	4.4522	9.02306e-19	Mob4	68	TSS	TRUE
chr1	55236800	55238999	168	28	5.17062e-76	6.31403	4.0146e-74	Mars2	722	TSS	TRUE
chr1	56969000	56973999	220	64	1.96209e-56	3.61741	8.79594e-55	9130024F11Rik	19	TSS	TRUE
chr1	56975800	56978599	98	46	5.16179e-13	2.24194	2.68243e-12	Gm4081	396	TSS	TRUE
chr1	57406000	57407599	93	27	2.646e-25	3.62472	3.12799e-24	Tyw5	300	TSS	TRUE
chr1	57995800	57997599	84	37	8.32627e-13	2.38909	4.25475e-12	Sgol2a	728	TSS	TRUE
chr1	58027400	58032999	169	82	1.38882e-19	2.16884	1.1637e-18	Aox1	268	TSS	TRUE
chr1	58422800	58424399	92	26	7.42418e-26	3.72366	9.05001e-25	Clk1	465	TSS	TRUE
chr1	58504400	58505599	216	26	1.68406e-123	8.7425	3.23827e-121	Orc2	108	TSS	TRUE
chr1	58585400	58586799	68	32	1.35268e-09	2.23622	5.08716e-09	Fam126b	222	TSS	TRUE
chr1	58649800	58653399	99	52	1.74894e-10	2.00349	7.22206e-10	Gm20257	-1041	TSS	TRUE
chr1	58709800	58715799	163	71	2.40924e-23	2.41593	2.52889e-22	Cflar	1239	TSS	TRUE
chr1	58794200	58795999	64	16	2.63886e-21	4.20935	2.45562e-20	Casp8	-274	TSS	TRUE
chr1	58973000	58976999	154	59	1.62674e-27	2.74678	2.18387e-26	Stradb	1477	TSS	TRUE
chr1	59119200	59120599	72	18	1.1282e-23	4.20935	1.21311e-22	G730003C15Rik	66	TSS	TRUE
chr1	59236400	59239199	90	44	3.22573e-11	2.15251	1.42955e-10	Als2	-569	TSS	TRUE
chr1	59481600	59485599	267	85	1.81935e-60	3.30558	9.22702e-59	Fzd7	1175	TSS	TRUE
chr1	59683200	59686999	124	50	7.88301e-21	2.6098	7.1322e-20	Nop58	90	TSS	TRUE
chr1	59762200	59764999	118	39	1.04384e-26	3.184	1.33736e-25	Bmpr2	199	TSS	TRUE
chr1	59910200	59916199	153	74	4.79881e-18	2.17578	3.63109e-17	Fam117b	193	TSS	TRUE
chr1	60095600	60098799	118	58	6.21594e-14	2.14096	3.47932e-13	Wdr12	707	TSS	TRUE
chr1	60179400	60181199	80	26	3.01828e-19	3.23796	2.47084e-18	Nbeal1	-299	TSS	TRUE
chr1	60342000	60343999	92	40	3.82916e-14	2.42038	2.17623e-13	Cyp20a1	-323	TSS	TRUE
chr1	60565600	60567799	81	20	1.12022e-26	4.26197	1.43198e-25	Raph1	78	TSS	TRUE
chr1	62698000	62704399	164	80	7.38776e-19	2.15729	5.90028e-18	Nrp2	-2085	TSS	TRUE
chr1	62705400	62708199	131	49	1.2504e-24	2.81339	1.41896e-23	Nrp2	3514	gene_body	TRUE
chr1	62722600	62725999	89	36	1.76776e-15	2.60161	1.11465e-14	Gm29083	-6227	gene_body	TRUE
chr1	63176000	63178399	106	52	9.03371e-13	2.14515	4.60142e-12	Eef1b2	374	TSS	TRUE
chr1	64120000	64122599	120	34	6.63033e-33	3.71413	1.17127e-31	Klf7	190	TSS	TRUE
chr1	64532000	64534199	97	18	3.34826e-41	5.67093	8.60643e-40	Creb1	280	TSS	TRUE
chr1	64615000	64619399	166	75	3.50313e-22	2.32917	3.44354e-21	Mettl21a	41	TSS	TRUE
chr1	64689200	64691999	155	44	1.05827e-41	3.7071	2.78678e-40	2810408I11Rik	58	TSS	TRUE
chr1	64734600	64739199	248	102	4.27217e-38	2.55862	9.69618e-37	Gm38058	659	TSS	TRUE
chr1	64956000	64957199	52	14	1.92278e-16	3.90868	1.29876e-15	Plekhm3	223	TSS	TRUE
chr1	65178000	65179399	59	21	3.8687e-13	2.95657	2.03089e-12	Idh1	7778	gene_body	TRUE
chr1	65185000	65187599	99	34	1.25098e-21	3.06416	1.19147e-20	Idh1	178	TSS	TRUE
chr1	66700200	66701399	109	12	1.46774e-67	9.55873	9.23735e-66	Rpe	-31	TSS	TRUE
chr1	66815800	66817999	86	11	7.32886e-49	8.22737	2.52999e-47	Kansl1l	645	TSS	TRUE
chr1	67036800	67039199	109	28	1.29594e-33	4.0966	2.38053e-32	Lancl1	871	TSS	TRUE
chr1	71101600	71105999	175	69	1.46512e-29	2.66897	2.19661e-28	Bard1	-654	TSS	TRUE
chr1	71556800	71558199	87	28	5.36904e-21	3.26976	4.90084e-20	Atic	349	TSS	TRUE
chr1	71652600	71653999	87	20	1.32667e-30	4.57767	2.09834e-29	Apol7d	-35	TSS	TRUE
chr1	72121400	72124199	83	40	8.67186e-11	2.1836	3.6793e-10	Gm4319	-799	TSS	TRUE
chr1	72234400	72236799	70	31	6.55037e-11	2.37625	2.82131e-10	Gm23472	-1346	intergenic	TRUE
chr1	72242400	72246999	166	57	9.97496e-35	3.0647	1.94456e-33	Gm24497	486	TSS	TRUE
chr1	72283800	72285799	68	25	3.60553e-14	2.86236	2.05379e-13	Tmem169	430	TSS	TRUE
chr1	72710200	72712999	72	23	6.27402e-18	3.29427	4.71967e-17	Rpl37a	309	TSS	TRUE
chr1	74236200	74238399	80	32	2.25225e-14	2.63084	1.30623e-13	Arpc2	802	TSS	TRUE
chr1	74276600	74288199	468	206	1.58713e-61	2.39075	8.32974e-60	Gm28364	1238	TSS	TRUE
chr1	74379600	74395599	587	279	1.96279e-65	2.21406	1.15789e-63	Ctdsp1	-3909	TSS	TRUE
chr1	74396800	74399399	104	42	8.94248e-18	2.60579	6.65337e-17	Mir26b	3789	gene_body	TRUE
chr1	74414200	74416999	81	42	3.63128e-09	2.02951	1.3037e-08	Vil1	6223	gene_body	TRUE
chr1	74504600	74507399	149	53	7.30989e-30	2.95846	1.11444e-28	Cnot9	-58	TSS	TRUE
chr1	74661600	74663399	75	28	4.48707e-15	2.81876	2.74392e-14	Ttll4	754	TSS	TRUE
chr1	74791200	74792399	63	22	3.03057e-14	3.01351	1.73612e-13	Wnt10a	283	TSS	TRUE
chr1	74793400	74795399	69	34	6.34363e-09	2.13563	2.2205e-08	Wnt10a	2883	gene_body	TRUE
chr1	74944400	74950999	246	126	1.92091e-24	2.05456	2.1614e-23	Ihh	3971	gene_body	TRUE
chr1	75123600	75125799	107	33	1.02902e-26	3.41212	1.31913e-25	Nhej1_v2	499	TSS	TRUE
chr1	75126600	75130399	119	61	7.26966e-13	2.05292	3.73085e-12	Nhej1_v2	-3300	gene_body	TRUE
chr1	75141000	75143599	166	48	1.65239e-43	3.63933	4.69315e-42	Cnppd1	337	TSS	TRUE
chr1	75188200	75192599	264	98	7.30165e-48	2.83487	2.41897e-46	Ankzf1	-1760	TSS	TRUE
chr1	75210600	75213799	149	75	3.1773e-16	2.09064	2.11421e-15	Stk16	1361	TSS	TRUE
chr1	75236000	75239999	139	72	2.33063e-14	2.0316	1.35038e-13	Dnajb2	1593	TSS	TRUE
chr1	75250600	75256199	193	98	5.15526e-20	2.07246	4.44487e-19	Gm28294	1077	TSS	TRUE
chr1	75312600	75318599	533	135	6.54449e-157	4.15478	1.98478e-154	Dnpep	2058	TSS	TRUE
chr1	75458200	75459999	105	34	1.12923e-24	3.24987	1.28388e-23	Asic4	8663	gene_body	TRUE
chr1	75471600	75480399	379	172	2.32338e-47	2.31881	7.55317e-46	Chpf	3306	TSS	TRUE
chr1	75518200	75522399	166	71	1.59823e-24	2.46039	1.80462e-23	Stk11ip	-1229	TSS	TRUE
chr1	77513400	77517999	204	65	1.00087e-46	3.30272	3.17832e-45	Gm28386	419	TSS	TRUE
chr1	78487800	78489599	79	27	8.0079e-18	3.07906	5.98563e-17	Farsb	158	TSS	TRUE
chr1	78657600	78661599	142	66	2.81461e-18	2.26412	2.16709e-17	Acsl3	1774	TSS	TRUE
chr1	79775800	79776399	42	10	1.75465e-15	4.41982	1.107e-14	Mrpl44	81	TSS	TRUE
chr1	80339400	80341399	63	13	3.14185e-25	5.09979	3.69964e-24	Cul3	79	TSS	TRUE
chr1	82282600	82284199	71	16	6.4921e-26	4.66975	7.94273e-25	Irs1	8015	gene_body	TRUE
chr1	82286000	82294199	343	172	7.05394e-35	2.09856	1.38228e-33	Irs1	1315	TSS	TRUE
chr1	82838800	82840599	79	16	1.54651e-31	5.19592	2.55516e-30	Agfg1	216	TSS	TRUE
chr1	84838200	84840799	115	18	1.41595e-55	6.72327	6.18203e-54	Fbxo36	-341	TSS	TRUE
chr1	85792400	85795599	101	34	1.25631e-22	3.12606	1.2679e-21	Cab39	558	TSS	TRUE
chr1	86358200	86363199	293	91	2.4821e-68	3.3883	1.59774e-66	C130036L24Rik	1115	TSS	TRUE
chr1	86433200	86436599	122	49	1.16357e-20	2.62011	1.04138e-19	1700019O17Rik	8570	intergenic	TRUE
chr1	86464200	86467599	100	47	3.31848e-13	2.23902	1.7552e-12	Rpl30-ps6	-7759	intergenic	TRUE
chr1	86468600	86473999	189	84	9.66503e-26	2.36776	1.16948e-24	Rpl30-ps6	-2359	TSS	TRUE
chr1	86517400	86529999	698	254	2.05219e-126	2.89186	4.17722e-124	Ptma	-3026	TSS	TRUE
chr1	86580000	86584799	229	76	2.50778e-49	3.17086	8.77101e-48	Pde6d	228	TSS	TRUE
chr1	87260400	87266199	143	75	2.58882e-14	2.00646	1.49081e-13	Efhd1	-1063	TSS	TRUE
chr1	87326600	87327799	95	21	1.74959e-34	4.76057	3.36356e-33	Gigyf2	196	TSS	TRUE
chr1	87755400	87756799	105	19	2.39357e-45	5.81555	7.22034e-44	Atg16l1	86	TSS	TRUE
chr1	88699000	88703199	177	70	1.00298e-29	2.66091	1.51683e-28	Arl4c	775	TSS	TRUE
chr1	89069600	89073599	199	49	4.01336e-62	4.27378	2.14369e-60	Sh3bp4	1184	TSS	TRUE
chr1	89452800	89454399	62	21	1.26234e-14	3.1069	7.46681e-14	Agap1	-1206	intergenic	TRUE
chr1	89455400	89457199	75	29	2.54452e-14	2.72156	1.46857e-13	Agap1	1493	gene_body	TRUE
chr1	89488200	89489999	66	32	7.01498e-09	2.17045	2.44405e-08	Gm37297	5661	gene_body	TRUE
chr1	89923400	89929199	176	91	1.03749e-17	2.03529	7.69191e-17	D130058E05Rik	-3961	gene_body	TRUE
chr1	89930600	89934399	99	51	6.37506e-11	2.04277	2.74777e-10	Gbx2	-1321	TSS	TRUE
chr1	89939200	89942199	108	51	5.66505e-14	2.22848	3.1828e-13	Gbx2	-9521	intergenic	TRUE
chr1	90518600	90521199	83	40	8.67186e-11	2.1836	3.6793e-10	Gm35048	-596	TSS	TRUE
chr1	90601200	90604599	101	44	2.85191e-15	2.41559	1.77242e-14	Cops8	-81	TSS	TRUE
chr1	90675000	90678199	104	52	4.26172e-12	2.10468	2.0486e-11	Gm9991	1438	TSS	TRUE
chr1	91248000	91252199	154	62	2.11012e-25	2.61387	2.50203e-24	Ube2f	-237	TSS	TRUE
chr1	91394800	91400399	168	83	9.22404e-19	2.13003	7.31128e-18	Ilkap	1099	TSS	TRUE
chr1	91455000	91460999	344	114	5.25037e-73	3.17547	3.81437e-71	Per2	1323	TSS	TRUE
chr1	91538200	91542599	253	58	2.15789e-84	4.59037	2.07029e-82	Asb1	-314	TSS	TRUE
chr1	91799400	91803199	208	71	2.79724e-43	3.0829	7.86568e-42	Twist2	-161	TSS	TRUE
chr1	92179000	92181999	422	28	0	15.8602	0	Hdac4	-159	TSS	TRUE
chr1	92520200	92523999	102	48	2.13327e-13	2.23622	1.1448e-12	Olfr1414	-3439	intergenic	TRUE
chr1	92930800	92935399	190	95	2.06438e-20	2.10468	1.82162e-19	Capn10	-1276	TSS	TRUE
chr1	93341600	93344799	179	55	2.65317e-43	3.42488	7.46988e-42	Ppp1r7	345	TSS	TRUE
chr1	93477800	93480799	193	65	4.2005e-41	3.12463	1.07421e-39	Sept2	335	TSS	TRUE
chr1	93511400	93513799	87	33	9.54143e-17	2.77434	6.58407e-16	Farp2	520	TSS	TRUE
chr1	93634400	93636599	129	48	1.76241e-24	2.82816	1.98553e-23	Gm28536	306	TSS	TRUE
chr1	93685200	93689399	183	82	1.29567e-24	2.34851	1.46886e-23	Bok	1639	TSS	TRUE
chr1	93748400	93755599	262	111	4.64191e-38	2.4839	1.05195e-36	Thap4	2779	TSS	TRUE
chr1	93801400	93806599	256	80	1.55831e-59	3.36748	7.62086e-58	Ing5	34	TSS	TRUE
chr1	94022400	94025999	113	59	7.65782e-12	2.01549	3.59954e-11	Neu4	3706	gene_body	TRUE
chr1	95313400	95314599	63	19	4.15013e-17	3.48933	2.9392e-16	Fam174a	376	TSS	TRUE
chr1	97660600	97661999	71	16	6.4921e-26	4.66975	7.94273e-25	D1Ertd622e	773	gene_body	TRUE
chr1	97768200	97770799	102	52	1.93729e-11	2.0642	8.76959e-11	Gin1	-697	TSS	TRUE
chr1	98094600	98096199	105	23	3.48662e-38	4.80415	7.94922e-37	Pam	231	TSS	TRUE
chr1	105662600	105664799	127	32	1.40405e-39	4.17646	3.39195e-38	2310035C23Rik	-213	TSS	TRUE
chr1	105989400	105994199	234	80	2.79268e-48	3.07809	9.40006e-47	Zcchc2	1393	TSS	TRUE
chr1	106170000	106173799	155	49	1.86751e-36	3.32882	3.95357e-35	Phlpp1	147	TSS	TRUE
chr1	106758200	106762399	140	59	1.43151e-21	2.49707	1.35527e-20	Kdsr	-573	TSS	TRUE
chr1	106795800	106796999	59	17	4.94729e-17	3.65223	3.48547e-16	Vps4b	266	TSS	TRUE
chr1	111864000	111865199	63	13	3.14185e-25	5.09979	3.69964e-24	Dsel	317	TSS	TRUE
chr1	118386000	118391399	160	84	9.72011e-16	2.00445	6.23733e-15	Clasp1	-358	TSS	TRUE
chr1	119836600	119838199	81	16	5.35297e-33	5.32746	9.51573e-32	Ptpn4	212	TSS	TRUE
chr1	120118200	120121799	140	62	9.31602e-20	2.37625	7.89372e-19	Dbi	1077	TSS	TRUE
chr1	120340400	120342799	101	48	4.85285e-13	2.21429	2.52799e-12	C1ql2	1017	TSS	TRUE
chr1	120599800	120607399	244	100	9.47305e-38	2.5677	2.11548e-36	En1	1181	TSS	TRUE
chr1	121327000	121328599	66	24	5.00058e-14	2.89393	2.81982e-13	Gm37174	-292	TSS	TRUE
chr1	121567600	121568199	42	13	8.75846e-12	3.39986	4.09898e-11	Ddx18	88	TSS	TRUE
chr1	125434400	125436399	107	28	2.20746e-32	4.02143	3.81165e-31	Actr3	326	TSS	TRUE
chr1	125557000	125562399	214	106	3.43996e-23	2.12453	3.58127e-22	Slc35f5	-1316	TSS	TRUE
chr1	127204000	127206999	170	57	1.02901e-36	3.13855	2.20479e-35	Mgat5	481	TSS	TRUE
chr1	127772800	127774999	146	31	1.09317e-53	4.95617	4.43827e-52	2900009J06Rik	191	TSS	TRUE
chr1	127867400	127869599	90	32	6.14437e-19	2.9597	4.93954e-18	Rab3gap1	-273	TSS	TRUE
chr1	128102600	128104799	288	32	1.2863e-172	9.47104	4.84376e-170	R3hdm1	375	TSS	TRUE
chr1	128243200	128244999	76	32	1.08359e-12	2.4993	5.48508e-12	Ubxn4	-62	TSS	TRUE
chr1	128358800	128360199	84	19	4.18659e-30	4.65244	6.46671e-29	Mcm6	163	TSS	TRUE
chr1	128416600	128417999	119	30	3.2066e-37	4.17427	6.99999e-36	Dars	58	TSS	TRUE
chr1	130715400	130717999	153	56	2.45543e-29	2.87514	3.63492e-28	Yod1	-627	TSS	TRUE
chr1	131095800	131098599	97	33	1.63824e-21	3.09323	1.54581e-20	Mapkapk2	625	TSS	TRUE
chr1	131137800	131139399	67	25	1.05485e-13	2.82026	5.80731e-13	Dyrk3	-260	TSS	TRUE
chr1	131151400	131156599	141	67	2.13512e-17	2.21462	1.54569e-16	Eif2d	818	TSS	TRUE
chr1	131278400	131281199	104	46	2.98063e-15	2.3792	1.84796e-14	Ikbke	-194	TSS	TRUE
chr1	131525000	131529599	477	82	3.43818e-205	6.12152	1.7073e-202	Srgap2	46	TSS	TRUE
chr1	131823800	131828799	244	78	3.65593e-55	3.29193	1.57487e-53	Slc41a1	-1677	TSS	TRUE
chr1	131910000	131913799	132	48	7.18761e-26	2.89393	8.76991e-25	Nucks1	1343	TSS	TRUE
chr1	131962600	131964199	54	22	4.28683e-10	2.58301	1.70515e-09	Slc45a3	432	TSS	TRUE
chr1	132007200	132009399	104	30	3.10543e-28	3.6481	4.32045e-27	Elk4	692	TSS	TRUE
chr1	132298400	132300399	93	33	1.4974e-19	2.96568	1.2498e-18	Klhdc8a	773	TSS	TRUE
chr1	132387800	132391999	105	47	4.68406e-15	2.35097	2.858e-14	Tmcc2	1380	TSS	TRUE
chr1	132416400	132418799	115	34	4.56204e-30	3.55938	7.02862e-29	Dstyk	44	TSS	TRUE
chr1	132879800	132881999	71	36	1.21599e-08	2.07544	4.12151e-08	Lrrn2	626	TSS	TRUE
chr1	133025000	133025799	46	9	5.83444e-20	5.37861	5.00468e-19	Mdm4	-62	TSS	TRUE
chr1	133045200	133047799	82	31	5.50309e-16	2.7836	3.59823e-15	Pik3c2b	487	TSS	TRUE
chr1	133608800	133611399	108	37	1.80408e-23	3.07169	1.91032e-22	Snrpe	190	TSS	TRUE
chr1	134090200	134094199	168	80	3.07516e-20	2.20991	2.68367e-19	Gm38140	6958	intergenic	TRUE
chr1	134360600	134362599	76	35	6.60028e-11	2.28508	2.84119e-10	Tmem183a	378	TSS	TRUE
chr1	134405600	134406799	79	30	2.2315e-15	2.77116	1.39848e-14	Cyb5r1	418	TSS	TRUE
chr1	134413800	134416599	136	51	2.19441e-25	2.80623	2.60026e-24	Adipor1	-178	TSS	TRUE
chr1	134954000	134958399	112	44	7.88343e-20	2.67868	6.72144e-19	Ppp1r12b	-260	TSS	TRUE
chr1	134962400	134963199	49	11	1.09201e-18	4.68769	8.62013e-18	Ube2t	234	TSS	TRUE
chr1	135146400	135149399	101	42	1.60976e-16	2.53062	1.09156e-15	Arl8a	1075	TSS	TRUE
chr1	135282000	135285199	118	59	1.86431e-13	2.10468	1.00476e-12	Rnpep	483	TSS	TRUE
chr1	135312400	135313999	84	32	3.85982e-16	2.76239	2.54996e-15	Timm17a	577	TSS	TRUE
chr1	135328200	135332399	103	52	9.12897e-12	2.08444	4.26553e-11	Lmod1	5492	gene_body	TRUE
chr1	135370400	135378999	303	146	6.73747e-34	2.18396	1.25755e-32	Shisa4	536	TSS	TRUE
chr1	135590800	135593399	91	47	3.83512e-10	2.0375	1.53276e-09	Gm4793	7326	gene_body	TRUE
chr1	135727800	135730599	87	44	3.30582e-10	2.08076	1.3298e-09	Csrp1	9138	gene_body	TRUE
chr1	135765800	135773199	230	98	2.39849e-33	2.46977	4.34052e-32	Phlda3	3380	TSS	TRUE
chr1	136015400	136018999	147	65	1.07282e-20	2.3799	9.62831e-20	Tmem9	9049	gene_body	TRUE
chr1	136232400	136235599	109	52	8.23557e-14	2.20586	4.57551e-13	5730559C18Rik	263	TSS	TRUE
chr1	136344800	136346999	89	36	1.76776e-15	2.60161	1.11465e-14	Camsap2	203	TSS	TRUE
chr1	136415000	136416199	63	11	4.61369e-29	6.02702	6.72419e-28	9230116N13Rik	-81	TSS	TRUE
chr1	136623400	136627799	151	63	1.69488e-23	2.52227	1.79869e-22	Zfp281	698	TSS	TRUE
chr1	136676200	136679399	106	43	6.03935e-18	2.59413	4.54806e-17	Gm19705	7030	gene_body	TRUE
chr1	138617600	138621599	183	68	7.58233e-34	2.83203	1.41116e-32	Nek7	148	TSS	TRUE
chr1	138839800	138842199	81	33	4.07109e-14	2.58301	2.30937e-13	Lhx9	7576	gene_body	TRUE
chr1	138845400	138849199	103	47	2.64868e-14	2.30619	1.52421e-13	Lhx9	1276	TSS	TRUE
chr1	139454000	139455399	79	25	1.0979e-19	3.32539	9.25938e-19	Aspm	-72	TSS	TRUE
chr1	143775800	143778199	117	42	1.26413e-23	2.93151	1.35412e-22	Trove2	67	TSS	TRUE
chr1	144003600	144008199	169	51	5.71058e-42	3.48716	1.52602e-40	Rgs2	-1739	TSS	TRUE
chr1	150098800	150101199	77	32	4.19158e-13	2.53219	2.19426e-12	Ptgs2	-31	TSS	TRUE
chr1	150392200	150393799	107	22	3.01837e-41	5.11819	7.78505e-40	BC003331	79	TSS	TRUE
chr1	151341600	151345799	203	50	2.67456e-63	4.27249	1.47209e-61	Gm10138	381	TSS	TRUE
chr1	151428000	151430199	86	28	1.78422e-20	3.23218	1.57872e-19	Trmt1l	557	TSS	TRUE
chr1	151500000	151501599	72	14	5.10238e-30	5.41202	7.83706e-29	Rnf2	154	TSS	TRUE
chr1	151754600	151756199	223	29	9.01568e-121	8.09211	1.66967e-118	Edem3	25	TSS	TRUE
chr1	152386400	152386799	40	6	1.14383e-21	7.01558	1.09252e-20	Tsen15	81	TSS	TRUE
chr1	152765400	152767399	128	47	8.53331e-25	2.86594	9.78688e-24	Rgl1	-95	TSS	TRUE
chr1	152901400	152904999	184	46	1.06784e-56	4.20935	4.82535e-55	Smg7	-578	TSS	TRUE
chr1	153332000	153333799	91	29	3.90168e-22	3.30216	3.82574e-21	Lamc1	-114	TSS	TRUE
chr1	153484600	153488399	144	59	3.27847e-23	2.56842	3.41984e-22	Dhx9	1159	TSS	TRUE
chr1	153898400	153901599	133	46	5.32729e-28	3.04263	7.33037e-27	Glul	55	TSS	TRUE
chr1	155097800	155100799	162	31	2.95809e-65	5.49931	1.73597e-63	Ier5	335	TSS	TRUE
chr1	155155200	155159599	170	77	1.47707e-22	2.32334	1.48588e-21	Stx6	-1315	TSS	TRUE
chr1	155556400	155559199	105	43	1.59031e-17	2.56966	1.16264e-16	Acbd6	-322	TSS	TRUE
chr1	155740400	155743599	105	55	4.57221e-11	2.00901	1.99459e-10	Lhx4	9683	gene_body	TRUE
chr1	155812000	155816399	158	79	2.5167e-17	2.10468	1.81148e-16	Qsox1	-1311	TSS	TRUE
chr1	155972600	155974399	81	30	2.69602e-16	2.84131	1.80059e-15	Gm9694	181	TSS	TRUE
chr1	156035400	156036799	94	43	3.57474e-13	2.30046	1.88401e-12	Tor1aip1	326	TSS	TRUE
chr1	156204400	156206399	75	33	1.1312e-11	2.39168	5.23413e-11	Fam163a	-374	TSS	TRUE
chr1	156473000	156476399	120	44	1.95686e-23	2.87001	2.06652e-22	Soat1	-369	TSS	TRUE
chr1	156557200	156560799	116	36	1.54005e-28	3.39087	2.18156e-27	Abl2	12	TSS	TRUE
chr1	156673200	156675399	95	38	1.13311e-16	2.63084	7.78104e-16	Tor3a	55	TSS	TRUE
chr1	156718200	156720199	139	19	1.0302e-73	7.69868	7.60666e-72	Fam20b	-128	TSS	TRUE
chr1	157411000	157413199	85	35	1.83351e-14	2.55568	1.06969e-13	2810025M15Rik	-252	TSS	TRUE
chr1	160194600	160195799	98	28	4.82638e-27	3.68318	6.32341e-26	Mrps14	-15	TSS	TRUE
chr1	160212400	160215199	109	47	1.31216e-16	2.44053	8.96826e-16	4933417C20Rik	856	TSS	TRUE
chr1	160789200	160794399	146	61	9.76373e-23	2.51871	9.89911e-22	Rabgap1l	1145	TSS	TRUE
chr1	160906000	160907399	101	19	2.70665e-42	5.594	7.31071e-41	Rc3h1	281	TSS	TRUE
chr1	161033600	161037799	203	70	1.09404e-41	3.05178	2.87261e-40	Zbtb37	-851	TSS	TRUE
chr1	161070000	161071399	78	28	1.74765e-16	2.93151	1.18329e-15	Cenpl	-13	TSS	TRUE
chr1	161129400	161131599	69	36	5.43966e-08	2.01698	1.70109e-07	Klhl20	1010	TSS	TRUE
chr1	161248400	161251399	106	55	2.2145e-11	2.02814	9.9725e-11	Prdx6	1318	TSS	TRUE
chr1	161875800	161879599	197	55	2.19747e-53	3.76928	8.83444e-52	Suco	-1018	TSS	TRUE
chr1	161968800	161969599	53	14	4.70964e-17	3.98385	3.32349e-16	Pigc	0	TSS	TRUE
chr1	162547200	162549199	94	44	1.24855e-12	2.24818	6.28631e-12	Mettl13	350	TSS	TRUE
chr1	162570200	162571399	81	21	2.40197e-25	4.05902	2.84285e-24	Vamp4	284	TSS	TRUE
chr1	162739800	162742399	99	40	5.20282e-17	2.60454	3.66064e-16	Prrc2c	-544	TSS	TRUE
chr1	163401800	163404799	119	42	1.39862e-24	2.98162	1.58359e-23	Gorab	368	TSS	TRUE
chr1	163929600	163930799	70	16	3.08548e-25	4.60398	3.63563e-24	Scyl3	1099	gene_body	TRUE
chr1	164247600	164251799	172	73	1.11625e-25	2.47948	1.34635e-24	Slc19a2	653	TSS	TRUE
chr1	164306800	164307999	61	29	1.18846e-08	2.21354	4.03504e-08	Blzf1	83	TSS	TRUE
chr1	164795600	164799799	106	51	2.88009e-13	2.18721	1.53004e-12	Dpt	1055	TSS	TRUE
chr1	165081600	165084999	99	49	7.54222e-12	2.12615	3.54963e-11	4930568G15Rik	8627	gene_body	TRUE
chr1	165193800	165195599	63	30	7.59481e-09	2.20991	2.63621e-08	Sft2d2	-262	TSS	TRUE
chr1	165236000	165237599	109	29	2.4053e-32	3.95534	4.14217e-31	Tiprl	142	TSS	TRUE
chr1	165458400	165461599	287	43	3.32197e-139	7.02374	8.33962e-137	Dcaf6	464	TSS	TRUE
chr1	165634200	165636799	128	39	5.52965e-32	3.45383	9.35332e-31	Mpzl1	-971	TSS	TRUE
chr1	165641200	165643199	99	28	1.27964e-27	3.72076	1.72559e-26	Gm18407	2487	intergenic	TRUE
chr1	165763200	165767399	145	72	2.64044e-16	2.11929	1.7649e-15	Creg1	1553	TSS	TRUE
chr1	166000400	166004199	143	30	3.05393e-53	5.01614	1.22125e-51	Pou2f1	377	TSS	TRUE
chr1	166378800	166382399	119	57	8.97212e-15	2.19699	5.36144e-14	Gm15853	-682	TSS	TRUE
chr1	167283000	167285999	133	34	1.08833e-40	4.1165	2.74975e-39	Uck2	819	TSS	TRUE
chr1	167308200	167309199	77	22	9.55826e-22	3.68318	9.16344e-21	Tmco1	-36	TSS	TRUE
chr1	167348800	167350999	80	35	1.95435e-12	2.40534	9.68559e-12	Aldh9a1	-91	TSS	TRUE
chr1	168431400	168435199	93	34	9.72264e-19	2.87845	7.69703e-18	Pbx1	-1030	TSS	TRUE
chr1	169968800	169969599	95	17	1.15602e-41	5.88071	3.03181e-40	Hsd17b7	40	TSS	TRUE
chr1	170107400	170112399	133	59	8.09826e-19	2.37222	6.44154e-18	Ddr2	660	TSS	TRUE
chr1	170174200	170176999	104	35	3.05667e-23	3.12695	3.19438e-22	Gm37748	419	TSS	TRUE
chr1	170214600	170215999	62	17	8.61104e-19	3.83794	6.83439e-18	Uhmk1	96	TSS	TRUE
chr1	170643600	170645199	75	36	5.1825e-10	2.19237	2.04298e-09	Olfml2b	-132	TSS	TRUE
chr1	170867400	170870399	104	39	6.1959e-20	2.80623	5.30567e-19	Gm9929	254	TSS	TRUE
chr1	170884600	170885599	69	22	2.57921e-17	3.30051	1.85485e-16	Gm26620	34	TSS	TRUE
chr1	171150200	171152999	101	44	2.85191e-15	2.41559	1.77242e-14	Mpz	888	TSS	TRUE
chr1	171245800	171248399	91	41	3.59798e-13	2.33568	1.89505e-12	Adamts4	-3321	gene_body	TRUE
chr1	171250200	171254599	184	81	1.44019e-25	2.3905	1.7251e-24	Ndufs2	-1149	TSS	TRUE
chr1	171256000	171259999	146	74	1.04985e-15	2.07623	6.71965e-15	Ndufs2	-6749	gene_body	TRUE
chr1	171283000	171289199	223	105	9.03708e-27	2.23496	1.16245e-25	Usp21	1890	TSS	TRUE
chr1	171328400	171330599	67	30	2.46012e-10	2.35022	1.00151e-09	Dedd	354	TSS	TRUE
chr1	171411000	171412399	86	24	1.1274e-24	3.77088	1.2826e-23	Tstd1	386	TSS	TRUE
chr1	172026400	172028399	79	27	8.0079e-18	3.07906	5.98563e-17	Vangl2	1043	gene_body	TRUE
chr1	172082400	172084199	64	28	2.36988e-10	2.40534	9.67391e-10	Ncstn	-505	TSS	TRUE
chr1	172147400	172149199	82	31	5.50309e-16	2.7836	3.59823e-15	Dcaf8	121	TSS	TRUE
chr1	172374400	172377999	251	66	3.28851e-72	4.00207	2.34757e-70	Pigm	-346	TSS	TRUE
chr1	172631800	172633199	63	16	1.13328e-20	4.14358	1.01498e-19	Dusp23	461	TSS	TRUE
chr1	175625200	175625999	89	20	5.94735e-32	4.6829	1.00373e-30	Fh1	34	TSS	TRUE
chr1	175691800	175695399	157	58	1.26173e-29	2.84857	1.89671e-28	Chml	-824	TSS	TRUE
chr1	175880400	175882399	82	22	1.07289e-24	3.92235	1.22244e-23	Exo1	818	TSS	TRUE
chr1	176812200	176814999	128	52	3.59752e-21	2.59037	3.31528e-20	Cep170	466	TSS	TRUE
chr1	176834000	176835799	67	23	2.33689e-15	3.06551	1.46259e-14	Gm38158	-824	TSS	TRUE
chr1	177257000	177259199	63	28	5.84774e-10	2.36776	2.29272e-09	Akt3	102	TSS	TRUE
chr1	177441200	177442199	217	14	3.97909e-178	16.3112	1.59121e-175	Gm26801	1569	gene_body	TRUE
chr1	177794800	177796999	121	29	7.19148e-40	4.39079	1.76422e-38	Adss	610	TSS	TRUE
chr1	178187200	178188799	65	20	3.62976e-17	3.4201	2.58404e-16	Desi2	467	TSS	TRUE
chr1	178317400	178321399	189	69	7.79892e-36	2.88249	1.60482e-34	Cox20	269	TSS	TRUE
chr1	178336000	178338599	164	35	1.0813e-59	4.93095	5.31104e-58	Hnrnpu	427	TSS	TRUE
chr1	178405400	178406599	87	14	8.5853e-42	6.53953	2.2674e-40	Efcab2	-103	TSS	TRUE
chr1	178527400	178532799	253	88	1.01771e-50	3.02547	3.74496e-49	Kif26b	974	TSS	TRUE
chr1	179516400	179518199	75	39	1.40347e-08	2.02373	4.71786e-08	Smyd3	733	TSS	TRUE
chr1	179545600	179546999	95	26	1.29205e-27	3.84508	1.7418e-26	Tfb2m	-33	TSS	TRUE
chr1	179801600	179805599	128	48	5.0434e-24	2.80623	5.53897e-23	Ahctf1	79	TSS	TRUE
chr1	180194200	180196799	121	58	5.75912e-15	2.19539	3.49413e-14	Coq8a	519	TSS	TRUE
chr1	180252600	180256799	181	72	4.67779e-30	2.64546	7.20081e-29	Psen2	1599	TSS	TRUE
chr1	180330600	180334599	155	62	7.93908e-26	2.63084	9.65034e-25	Gm5069	-2050	gene_body	TRUE
chr1	180567800	180569999	103	29	8.63006e-29	3.73761	1.23821e-27	Parp1	-29	TSS	TRUE
chr1	180639800	180642799	109	49	1.97593e-15	2.34091	1.24089e-14	Lin9	149	TSS	TRUE
chr1	180724200	180726799	98	42	2.65771e-15	2.45545	1.65525e-14	Acbd3	-543	TSS	TRUE
chr1	180774000	180779199	222	95	5.14289e-32	2.45915	8.72853e-31	Gm38293	-7944	intergenic	TRUE
chr1	180812400	180816199	183	53	1.27964e-47	3.63354	4.1993e-46	H3f3aos	523	TSS	TRUE
chr1	180848000	180852399	190	77	1.78323e-30	2.59668	2.79794e-29	Sde2	-927	TSS	TRUE
chr1	180887000	180890599	121	58	5.75912e-15	2.19539	3.49413e-14	Lefty2	-4308	intergenic	TRUE
chr1	180903000	180909799	259	136	3.51026e-24	2.00408	3.89782e-23	Pycr2	2106	TSS	TRUE
chr1	181210600	181213399	89	38	3.54652e-14	2.46469	2.0217e-13	Wdr26	-448	TSS	TRUE
chr1	181352800	181354399	72	26	2.95382e-15	2.91417	1.83259e-14	Cnih3	969	gene_body	TRUE
chr1	181839400	181843599	184	41	6.80121e-64	4.72269	3.82255e-62	Lbr	878	TSS	TRUE
chr1	182124200	182128999	148	62	6.49888e-23	2.51203	6.64715e-22	Gm17968	1588	TSS	TRUE
chr1	182408400	182409599	77	20	3.65858e-24	4.0515	4.05753e-23	Gm10517	20	TSS	TRUE
chr1	182747400	182749599	87	45	9.41841e-10	2.03452	3.60341e-09	Ccdc185	679	TSS	TRUE
chr1	183078800	183082599	88	45	4.48127e-10	2.0579	1.77873e-09	Gm24975	6093	intergenic	TRUE
chr1	183344800	183346599	74	28	1.29039e-14	2.78118	7.62275e-14	Mia3_v1	-404	TSS	TRUE
chr1	183369000	183370999	78	30	6.30381e-15	2.73608	3.81206e-14	Mia3_v2	-447	TSS	TRUE
chr1	184033400	184035599	155	29	8.31876e-64	5.62456	4.66387e-62	Dusp10	118	TSS	TRUE
chr1	184729600	184734599	165	70	9.66012e-25	2.48051	1.10456e-23	Hlx	518	TSS	TRUE
chr1	184844800	184846399	67	12	4.06623e-30	5.87555	6.28941e-29	Marc2	280	TSS	TRUE
chr1	185203400	185204799	57	21	3.49493e-12	2.85634	1.69043e-11	Rab3gap2	-17	TSS	TRUE
chr1	186704000	186706399	75	26	1.03641e-16	3.03559	7.13599e-16	Gm29491	-495	TSS	TRUE
chr1	186748000	186750999	97	41	1.59291e-15	2.48968	1.00679e-14	A430105J06Rik	103	TSS	TRUE
chr1	189687600	189688399	117	11	1.25783e-79	11.193	1.09728e-77	Cenpf	85	TSS	TRUE
chr1	189726600	189733599	245	123	1.79351e-25	2.09612	2.13613e-24	Ptpn14	1831	TSS	TRUE
chr1	190977200	190979799	143	64	9.4934e-20	2.35132	8.03875e-19	Vash2	795	TSS	TRUE
chr1	191024600	191026799	111	38	4.39452e-24	3.07393	4.84636e-23	A230020J21Rik	348	TSS	TRUE
chr1	191097200	191099399	76	28	1.54035e-15	2.85634	9.75412e-15	Batf3	419	TSS	TRUE
chr1	191309000	191312999	143	75	2.58882e-14	2.00646	1.49081e-13	Nenf	7193	gene_body	TRUE
chr1	191316600	191318399	67	25	1.05485e-13	2.82026	5.80731e-13	Nenf	693	TSS	TRUE
chr1	191324000	191326599	112	57	2.06622e-12	2.06775	1.02053e-11	Tmem206	-612	TSS	TRUE
chr1	191394400	191398199	333	43	8.93757e-180	8.1495	3.63848e-177	Ppp2r5a	740	TSS	TRUE
chr1	191574200	191577599	175	64	2.89482e-33	2.87749	5.22617e-32	Ints7	263	TSS	TRUE
chr1	191821200	191822799	91	34	8.23161e-18	2.81655	6.14319e-17	Gm38037	-7	TSS	TRUE
chr1	191905000	191909999	179	93	8.79537e-18	2.02547	6.55202e-17	Slc30a1	732	TSS	TRUE
chr1	191978600	191981799	123	60	1.16447e-14	2.15729	6.90462e-14	Rd3	2829	gene_body	TRUE
chr1	191988800	191991399	164	34	2.32459e-61	5.07598	1.21298e-59	Gm26670	21	TSS	TRUE
chr1	192089400	192093799	134	61	4.6124e-18	2.31169	3.49297e-17	Gm26879	-755	TSS	TRUE
chr1	192134800	192138799	163	60	7.73126e-31	2.85885	1.23755e-29	Gm10516	-96	TSS	TRUE
chr1	192768600	192773199	135	70	5.6778e-14	2.02951	3.18897e-13	Hhat	312	TSS	TRUE
chr1	192822600	192825399	82	41	5.92474e-10	2.10468	2.32059e-09	Gm38360	-2873	intergenic	TRUE
chr1	192854600	192858599	115	52	5.39619e-16	2.32728	3.53114e-15	Sertad4	-844	TSS	TRUE
chr1	193129000	193131999	98	42	2.65771e-15	2.45545	1.65525e-14	Diexf	-228	TSS	TRUE
chr1	194617600	194621599	164	64	2.59791e-28	2.69661	3.63563e-27	Plxna2	-225	TSS	TRUE
chr1	194975800	194979799	161	71	1.42672e-22	2.38629	1.4362e-21	Gm16897	-840	TSS	TRUE
chr1	195130800	195132199	62	21	1.26234e-14	3.1069	7.46681e-14	Cr1l	-156	TSS	TRUE
chr1	195262800	195265799	81	37	1.16334e-11	2.30377	5.37707e-11	Gm38046	-4452	intergenic	TRUE
chr2	3281600	3285999	255	73	2.6015e-66	3.67597	1.57583e-64	Nmt2	-412	TSS	TRUE
chr2	3331200	3333199	85	37	3.37808e-13	2.41753	1.78484e-12	Rpp38	442	TSS	TRUE
chr2	3422200	3425199	117	60	1.13638e-12	2.05206	5.73814e-12	Dclre1c	-431	TSS	TRUE
chr2	3474400	3475999	80	25	3.20412e-20	3.36748	2.79163e-19	Suv39h2	-169	TSS	TRUE
chr2	3510800	3513799	207	54	1.52769e-60	4.03396	7.77403e-59	Hspa14	513	TSS	TRUE
chr2	4880600	4882999	79	18	2.94306e-28	4.61859	4.1034e-27	Sephs1	235	TSS	TRUE
chr2	5010200	5012999	101	53	1.11813e-10	2.0054	4.70209e-10	Mcm10	743	TSS	TRUE
chr2	5844400	5846599	92	33	4.51173e-19	2.93379	3.65336e-18	Cdc123	-336	TSS	TRUE
chr2	5894400	5895799	76	33	4.56804e-12	2.42357	2.18968e-11	Sec61a2	331	TSS	TRUE
chr2	5949200	5953599	159	61	2.83872e-28	2.74298	3.96649e-27	Upf2	-69	TSS	TRUE
chr2	9876400	9883799	264	91	1.6108e-53	3.05294	6.52229e-52	4930412O13Rik	-1152	TSS	TRUE
chr2	10047400	10048999	117	25	2.82534e-43	4.92494	7.93484e-42	C630004M23Rik	361	TSS	TRUE
chr2	10079400	10080999	80	28	1.88693e-17	3.00668	1.37316e-16	Atp5c1	309	TSS	TRUE
chr2	11601800	11604199	72	26	2.95382e-15	2.91417	1.83259e-14	Rbm17	261	TSS	TRUE
chr2	11776200	11781399	552	88	2.9402e-252	6.60103	1.98301e-249	Ankrd16	308	TSS	TRUE
chr2	13009000	13012799	129	52	1.36119e-21	2.61061	1.29099e-20	C1ql3	905	TSS	TRUE
chr2	13544000	13546399	76	31	2.38496e-13	2.57992	1.27465e-12	Trdmt1	-532	TSS	TRUE
chr2	13572200	13576599	190	78	8.17157e-30	2.56339	1.24287e-28	Vim	447	TSS	TRUE
chr2	14054000	14056399	93	27	2.646e-25	3.62472	3.12799e-24	Hacd1	835	TSS	TRUE
chr2	14073000	14074999	100	39	3.84759e-18	2.6983	2.93517e-17	Stamos	-66	TSS	TRUE
chr2	14603800	14606199	85	39	4.84497e-12	2.29356	2.31824e-11	Gm10849	-389	TSS	TRUE
chr2	15054400	15055799	111	22	3.83597e-44	5.30952	1.11544e-42	Nsun6	-216	TSS	TRUE
chr2	18025600	18029199	156	71	1.09387e-20	2.31218	9.80949e-20	Gm13330	-5133	gene_body	TRUE
chr2	18045800	18048399	90	35	1.29472e-16	2.70601	8.85378e-16	Skida1	1950	gene_body	TRUE
chr2	18055400	18058599	156	36	1.09801e-52	4.56013	4.30703e-51	1810059C17Rik	-387	TSS	TRUE
chr2	18064000	18065599	105	26	9.18414e-34	4.24982	1.70052e-32	Mir7655	6953	gene_body	TRUE
chr2	18392000	18394199	81	34	1.85365e-13	2.50704	9.99435e-13	Dnajc1	-289	TSS	TRUE
chr2	18688400	18690999	73	34	2.40109e-10	2.25943	9.79466e-10	Spag6	-9323	intergenic	TRUE
chr2	18694000	18695399	52	18	2.88127e-12	3.04009	1.40497e-11	Spag6	-4323	intergenic	TRUE
chr2	18996600	18999799	122	58	2.5643e-15	2.21354	1.59939e-14	Pip4k2a	-74	TSS	TRUE
chr2	20969000	20969999	85	17	4.00044e-34	5.26169	7.58113e-33	Gm13375	445	TSS	TRUE
chr2	21205000	21206199	58	17	1.84835e-16	3.59033	1.24979e-15	Thnsl1	-124	TSS	TRUE
chr2	22773600	22775799	75	38	4.92871e-09	2.07698	1.74784e-08	Apbb1ip	605	TSS	TRUE
chr2	22895000	22896199	78	27	2.51113e-17	3.04009	1.80819e-16	Pdss1	77	TSS	TRUE
chr2	23067200	23069599	120	35	8.64397e-32	3.60801	1.44401e-30	Acbd5	231	TSS	TRUE
chr2	23155400	23156999	106	38	1.17744e-21	2.93547	1.12333e-20	Yme1l1	-169	TSS	TRUE
chr2	24473600	24477199	115	57	2.11176e-13	2.12314	1.13414e-12	Pax8	198	TSS	TRUE
chr2	24918600	24919999	53	22	1.13964e-09	2.53518	4.32211e-09	Ehmt1	313	TSS	TRUE
chr2	24948600	24951199	158	40	2.21454e-48	4.15673	7.47913e-47	Zmynd19	107	TSS	TRUE
chr2	24974200	24978199	211	81	9.83015e-37	2.74127	2.11224e-35	Pnpla7	166	TSS	TRUE
chr2	25209800	25217399	296	153	2.29884e-28	2.03589	3.22809e-27	Stpg3	1030	TSS	TRUE
chr2	25258400	25276199	747	365	9.92742e-78	2.15369	8.09748e-76	Tprn	4681	TSS	TRUE
chr2	25331600	25334599	156	77	1.32446e-17	2.13201	9.73961e-17	Man1b1	370	TSS	TRUE
chr2	25370800	25377999	329	164	5.36806e-34	2.11109	1.00736e-32	Sapcd2	2078	TSS	TRUE
chr2	25454400	25462599	352	156	2.98702e-46	2.37451	9.31522e-45	Clic3	1661	TSS	TRUE
chr2	25543400	25547399	427	87	5.31529e-158	5.16492	1.64512e-155	Traf2	1539	TSS	TRUE
chr2	25570000	25581999	538	279	2.41612e-49	2.02924	8.45699e-48	Gm26702	568	TSS	TRUE
chr2	25607600	25609799	106	38	1.17744e-21	2.93547	1.12333e-20	Rabl6	-179	TSS	TRUE
chr2	25982200	25984599	118	32	4.47144e-34	3.88049	8.44008e-33	Camsap1	-118	TSS	TRUE
chr2	26020400	26021799	87	27	5.57461e-22	3.39087	5.41557e-21	Ubac1	646	TSS	TRUE
chr2	26237000	26238199	52	17	3.51421e-13	3.21891	1.85352e-12	Qsox2	-75	TSS	TRUE
chr2	26380200	26380799	59	15	1.73988e-19	4.13919	1.44512e-18	Snapc4	148	TSS	TRUE
chr2	26444200	26448999	292	128	1.41487e-39	2.40065	3.41535e-38	0610009E02Rik	903	TSS	TRUE
chr2	26932600	26936599	130	55	4.74858e-20	2.48734	4.1052e-19	Stkld1	530	TSS	TRUE
chr2	27438000	27438999	52	22	2.97604e-09	2.48734	1.07905e-08	D2Bwg1423e	-3824	intergenic	TRUE
chr2	27675200	27677799	105	42	3.34855e-18	2.63084	2.56378e-17	Rxra	-701	TSS	TRUE
chr2	28582000	28587599	254	117	1.49216e-31	2.28456	2.46716e-30	Gtf3c5	-1521	TSS	TRUE
chr2	28592400	28594999	85	39	4.84497e-12	2.29356	2.31824e-11	Gm22675	-1427	intergenic	TRUE
chr2	28637400	28642399	185	81	5.93783e-26	2.40349	7.29721e-25	Tsc1	-1337	TSS	TRUE
chr2	28839400	28841599	147	44	3.37639e-37	3.51576	7.36353e-36	Ddx31	40	TSS	TRUE
chr2	28917400	28919799	73	26	9.79826e-16	2.95464	6.28301e-15	Barhl1	-2188	intergenic	TRUE
chr2	28929600	28931599	66	31	2.11088e-09	2.24046	7.77617e-09	Gm13394	4008	gene_body	TRUE
chr2	29124600	29129599	222	87	2.94712e-37	2.68528	6.43977e-36	Setx	2107	TSS	TRUE
chr2	29251400	29253399	70	19	3.73556e-21	3.87703	3.43899e-20	Ntng2	-4275	intergenic	TRUE
chr2	29825200	29830199	205	90	2.23739e-28	2.39699	3.14473e-27	Urm1	7624	gene_body	TRUE
chr2	29933200	29937199	204	76	2.58662e-37	2.8247	5.67675e-36	Gle1	-226	TSS	TRUE
chr2	29965200	29966599	61	12	1.48518e-25	5.34938	1.7771e-24	Sptan1	339	TSS	TRUE
chr2	30060000	30065199	189	67	1.92234e-37	2.96853	4.24361e-36	Set	5221	gene_body	TRUE
chr2	30066000	30068399	81	24	8.27371e-22	3.55164	7.97169e-21	Set	9821	gene_body	TRUE
chr2	30131400	30137599	227	114	9.64381e-24	2.09544	1.04242e-22	Tbc1d13	753	TSS	TRUE
chr2	30261200	30262399	63	33	2.11533e-07	2.00901	6.13467e-07	Phyhd1	-4403	gene_body	TRUE
chr2	30390800	30416799	1124	579	3.46287e-102	2.04288	4.50951e-100	Gm16323	-9916	TSS	TRUE
chr2	30466800	30474799	450	157	7.02037e-88	3.01625	7.19357e-86	Ier5l	3418	TSS	TRUE
chr2	30977800	30988799	447	214	1.29128e-49	2.19811	4.57648e-48	Usp20	1020	TSS	TRUE
chr2	31570400	31580799	314	157	2.50838e-32	2.10468	4.31476e-31	Fubp3	2948	TSS	TRUE
chr2	31635200	31644999	408	204	2.46206e-41	2.10468	6.38298e-40	Prdm12	62	TSS	TRUE
chr2	31669600	31671599	74	33	2.76563e-11	2.35979	1.23382e-10	Exosc2	-115	TSS	TRUE
chr2	31685600	31691599	222	109	1.95975e-24	2.14329	2.20291e-23	Abl1	48	TSS	TRUE
chr2	31973600	31975999	145	61	2.48674e-22	2.50146	2.4705e-21	Nup214	363	TSS	TRUE
chr2	32149800	32157399	236	118	7.73282e-25	2.10468	8.88458e-24	Prrc2b	2517	TSS	TRUE
chr2	32285800	32289599	154	55	1.31888e-30	2.94655	2.08747e-29	Swi5	374	TSS	TRUE
chr2	32361400	32364599	188	62	2.76214e-41	3.19096	7.14047e-40	Dnm1	-9662	gene_body	TRUE
chr2	32447200	32458599	915	248	4.38226e-247	3.88262	2.86994e-244	Slc25a25	-1455	TSS	TRUE
chr2	32604600	32613799	368	171	6.59467e-44	2.26468	1.90415e-42	St6galnac6	9490	gene_body	TRUE
chr2	32618000	32620399	93	46	2.89e-11	2.12755	1.28619e-10	Ak1	-2558	gene_body	TRUE
chr2	32663800	32666599	81	42	3.63128e-09	2.02951	1.3037e-08	AL772271.1	-9909	gene_body	TRUE
chr2	32749000	32751599	107	47	7.98326e-16	2.39575	5.14839e-15	Tor2a	-6934	gene_body	TRUE
chr2	32755800	32760599	191	85	6.30495e-26	2.36466	7.72632e-25	Tor2a	965	TSS	TRUE
chr2	32979600	32984599	272	84	4.32019e-64	3.40757	2.45252e-62	Slc2a8	-18	TSS	TRUE
chr2	33128800	33132999	296	88	4.9907e-73	3.53968	3.63156e-71	Garnl3	535	TSS	TRUE
chr2	33467400	33468999	154	28	5.25824e-65	5.78786	3.0541e-63	Zbtb43	331	TSS	TRUE
chr2	34370200	34371799	79	18	2.94306e-28	4.61859	4.1034e-27	Pbx3	1037	gene_body	TRUE
chr2	34372600	34374199	144	33	3.56623e-49	4.59202	1.24249e-47	Pbx3	-1362	intergenic	TRUE
chr2	34404800	34408799	159	60	5.16771e-29	2.78869	7.51347e-28	Mapkap1	-383	TSS	TRUE
chr2	34770400	34772799	234	70	8.31638e-58	3.51781	3.85042e-56	Hspa5	-370	TSS	TRUE
chr2	34798600	34800599	94	39	1.40396e-15	2.5364	8.9154e-15	Rabepk	311	TSS	TRUE
chr2	34801600	34803199	78	26	3.23827e-18	3.15701	2.48271e-17	Rabepk	-2488	intergenic	TRUE
chr2	34841200	34843799	72	34	5.55385e-10	2.22848	2.1827e-09	Gm34653	5320	intergenic	TRUE
chr2	34869600	34873399	181	80	5.31886e-25	2.38091	6.17387e-24	Psmd5	-538	TSS	TRUE
chr2	35108000	35110199	111	51	4.62157e-15	2.29038	2.82215e-14	Cntrl	-392	TSS	TRUE
chr2	35199400	35202399	162	49	3.24544e-40	3.47916	8.0624e-39	Rab14	219	TSS	TRUE
chr2	35334000	35339199	211	74	3.46055e-42	3.00058	9.30806e-41	Stom	375	TSS	TRUE
chr2	35458000	35465399	225	114	4.28643e-23	2.07698	4.43137e-22	Ggta1	-251	TSS	TRUE
chr2	36135800	36138399	111	49	3.40359e-16	2.38387	2.25896e-15	Rbm18	-327	TSS	TRUE
chr2	37358600	37360399	78	41	1.18282e-08	2.00201	4.01752e-08	Pdcl	-168	TSS	TRUE
chr2	37441400	37443599	87	38	2.21031e-13	2.4093	1.1846e-12	Zbtb6	670	TSS	TRUE
chr2	37451800	37453599	115	29	4.8498e-36	4.17306	1.00714e-34	Gpr21	9414	gene_body	TRUE
chr2	38286400	38287999	70	30	1.61648e-11	2.45545	7.38391e-11	Dennd1a	174	TSS	TRUE
chr2	38642600	38644999	98	31	6.89803e-24	3.32674	7.52737e-23	Psmb7	286	TSS	TRUE
chr2	38925000	38927399	96	30	8.24697e-24	3.36748	8.95074e-23	Nr6a1	1487	gene_body	TRUE
chr2	38996400	39006599	466	188	6.57384e-72	2.60845	4.61271e-70	Gm13496	-3242	TSS	TRUE
chr2	39007600	39009599	117	42	1.26413e-23	2.93151	1.35412e-22	Rpl35	-2976	gene_body	TRUE
chr2	39064000	39065999	81	40	4.26439e-10	2.13098	1.69771e-09	Golga1	540	TSS	TRUE
chr2	39188600	39192399	236	72	7.86562e-57	3.44933	3.56501e-55	Scai	233	TSS	TRUE
chr2	39224000	39226599	96	35	2.38238e-19	2.88641	1.96236e-18	Ppp6c	1150	TSS	TRUE
chr2	44926400	44927799	76	14	4.86696e-33	5.71269	8.67567e-32	Gtdc1	60	TSS	TRUE
chr2	45107800	45113199	125	57	6.15996e-17	2.30776	4.31259e-16	Zeb2os	-638	TSS	TRUE
chr2	45115600	45117599	70	25	4.03823e-15	2.94655	2.48187e-14	Zeb2	794	TSS	TRUE
chr2	48948800	48950199	87	22	8.94929e-28	4.16152	1.21862e-26	Mbd5	-23	TSS	TRUE
chr2	49450800	49453999	131	41	1.39303e-31	3.36235	2.30411e-30	Epc2	913	TSS	TRUE
chr2	50066000	50067799	59	30	1.84295e-07	2.0696	5.38622e-07	Lypd6	470	TSS	TRUE
chr2	50295400	50297199	67	27	3.08189e-12	2.61136	1.49819e-11	Mmadhc	416	TSS	TRUE
chr2	51147000	51149399	112	34	2.07767e-28	3.46652	2.92297e-27	Rnd3	910	TSS	TRUE
chr2	52424400	52426199	61	21	4.01334e-14	3.05679	2.27804e-13	A430018G15Rik	287	TSS	TRUE
chr2	52741200	52743799	131	47	3.34301e-26	2.93311	4.15925e-25	Stam2	-300	TSS	TRUE
chr2	52856200	52861199	146	72	1.22196e-16	2.13391	8.37521e-16	Fmnl2	831	TSS	TRUE
chr2	53190600	53192599	219	25	1.11174e-129	9.21848	2.39226e-127	Prpf40a	-375	TSS	TRUE
chr2	57114200	57117599	138	60	3.66862e-20	2.42038	3.18865e-19	Nr4a2	8102	gene_body	TRUE
chr2	57123400	57125599	71	32	1.03171e-10	2.33487	4.35118e-10	Nr4a2	-497	TSS	TRUE
chr2	57234600	57240199	164	85	1.48737e-16	2.03039	1.01054e-15	Gpd2	-278	TSS	TRUE
chr2	59160000	59165599	203	79	1.16998e-34	2.70411	2.27052e-33	Pkp4	1949	TSS	TRUE
chr2	59611400	59614399	138	48	9.7981e-29	3.02547	1.40246e-27	Tanc1	855	TSS	TRUE
chr2	60381200	60384799	124	54	2.78673e-18	2.41648	2.14691e-17	Ly75	302	TSS	TRUE
chr2	60961200	60964799	119	47	9.33112e-21	2.66443	8.41122e-20	Rbms1	191	TSS	TRUE
chr2	61711200	61712799	82	25	2.63186e-21	3.45167	2.45037e-20	Psmd14	305	TSS	TRUE
chr2	66256200	66257399	61	22	2.83735e-13	2.91785	1.50929e-12	Ttc21b	-183	TSS	TRUE
chr2	68470600	68472999	90	22	1.11081e-29	4.30502	1.67541e-28	Stk39	467	TSS	TRUE
chr2	68859600	68863399	206	62	8.5516e-51	3.49648	3.15196e-49	Cers6	58	TSS	TRUE
chr2	69205600	69206799	62	23	6.07547e-13	2.83674	3.14045e-12	Spc25	-6	TSS	TRUE
chr2	69712200	69714599	87	42	3.54954e-11	2.17984	1.56545e-10	Fastkd1	-794	TSS	TRUE
chr2	69721000	69723799	134	46	1.71897e-28	3.06551	2.43082e-27	Ppig	-405	TSS	TRUE
chr2	69883800	69887199	97	43	2.61555e-14	2.37388	1.50553e-13	Mettl5	114	TSS	TRUE
chr2	69895600	69899399	115	51	1.44741e-16	2.37292	9.84061e-16	Ubr3	253	TSS	TRUE
chr2	70660600	70662399	74	25	4.30063e-17	3.11492	3.04222e-16	Gorasp2	-76	TSS	TRUE
chr2	71054800	71057399	112	30	6.4026e-33	3.92873	1.13193e-31	Dcaf17	318	TSS	TRUE
chr2	71211400	71212799	75	17	4.3749e-27	4.64267	5.74772e-26	Dync1i2	393	TSS	TRUE
chr2	71387800	71390599	161	62	1.97431e-28	2.73268	2.78189e-27	Hat1	241	TSS	TRUE
chr2	71519600	71532799	388	201	2.63303e-36	2.03138	5.52374e-35	Dlx1as	1718	TSS	TRUE
chr2	71533600	71536799	81	41	1.27487e-09	2.07901	4.80675e-09	Dlx1	7086	gene_body	TRUE
chr2	71539000	71548599	406	158	6.0032e-67	2.70411	3.7314e-65	Dlx2	2953	TSS	TRUE
chr2	71872200	71874799	140	48	1.02579e-29	3.06932	1.55054e-28	Pdk1	275	TSS	TRUE
chr2	72285000	72286399	56	10	1.20198e-25	5.89309	1.44571e-24	Zak	62	TSS	TRUE
chr2	72475800	72476999	100	20	1.0653e-39	5.26169	2.59579e-38	Cdca7	240	TSS	TRUE
chr2	72978600	72981199	235	28	4.98303e-135	8.83212	1.18512e-132	Sp3os	475	TSS	TRUE
chr2	73213600	73215399	133	15	1.53443e-80	9.33073	1.36223e-78	Ola1	-53	TSS	TRUE
chr2	73263200	73265199	81	29	4.25338e-17	2.93929	3.01068e-16	Sp9	-7766	intergenic	TRUE
chr2	73273200	73274799	55	21	2.95263e-11	2.75612	1.312e-10	Sp9	2033	gene_body	TRUE
chr2	73277200	73279399	98	40	1.37689e-16	2.57823	9.3887e-16	Sp9	6333	gene_body	TRUE
chr2	73311800	73314999	94	41	2.50742e-14	2.41268	1.44929e-13	Cir1	-699	TSS	TRUE
chr2	73386000	73386999	109	24	2.39999e-39	4.77937	5.73663e-38	Gpr155	71	TSS	TRUE
chr2	73528000	73530599	91	39	2.33677e-14	2.45545	1.35342e-13	Wipf1	433	TSS	TRUE
chr2	73891400	73893199	97	34	1.1976e-20	3.00226	1.07131e-19	Atf2	338	TSS	TRUE
chr2	73910600	73911799	60	30	8.49954e-08	2.10468	2.59538e-07	Atp5g3	125	TSS	TRUE
chr2	74578000	74579799	112	39	1.03046e-23	3.0221	1.11119e-22	Lnpk1	47	TSS	TRUE
chr2	74673800	74682599	254	124	5.49894e-28	2.15559	7.56196e-27	Hoxd11	-1357	TSS	TRUE
chr2	74691400	74700799	316	145	5.26516e-39	2.29337	1.24047e-37	Gm14396	579	TSS	TRUE
chr2	74703800	74706999	99	30	1.94603e-25	3.47271	2.31413e-24	Hoxd8	494	TSS	TRUE
chr2	74707800	74712599	135	49	1.76893e-26	2.8993	2.23342e-25	Hoxd3	-1727	TSS	TRUE
chr2	74722800	74729599	204	99	3.434e-23	2.16845	3.57712e-22	Mir10b	129	TSS	TRUE
chr2	74746200	74751199	175	79	2.64301e-23	2.33113	2.77105e-22	Gm14424	-3984	gene_body	TRUE
chr2	74761800	74764399	81	37	1.16334e-11	2.30377	5.37707e-11	Hoxd1	119	TSS	TRUE
chr2	75658600	75659999	147	18	5.22593e-84	8.59409	4.96112e-82	Hnrnpa3	32	TSS	TRUE
chr2	75702200	75705599	241	58	1.54205e-76	4.37264	1.20976e-74	Nfe2l2	740	TSS	TRUE
chr2	75830600	75834199	136	69	9.73919e-15	2.07417	5.80332e-14	Agps	222	TSS	TRUE
chr2	76405600	76408199	74	26	3.20756e-16	2.99511	2.13356e-15	Osbpl6	361	TSS	TRUE
chr2	76647200	76650199	131	47	3.34301e-26	2.93311	4.15925e-25	Prkra	-685	TSS	TRUE
chr2	76672000	76673999	74	29	7.06779e-14	2.68528	3.94271e-13	Fkbp7	69	TSS	TRUE
chr2	77278600	77282199	89	43	2.27127e-11	2.17809	1.022e-10	Sestd1	191	TSS	TRUE
chr2	78867800	78871399	90	40	2.30053e-13	2.36776	1.23113e-12	Ube2e3	552	TSS	TRUE
chr2	79634800	79637799	126	33	1.15183e-37	4.01802	2.56272e-36	Ssfa2	947	TSS	TRUE
chr2	80315200	80316199	77	16	4.25269e-30	5.06437	6.56544e-29	Dnajc10	233	TSS	TRUE
chr2	80579400	80581799	79	22	6.55262e-23	3.77885	6.69985e-22	Nckap1	779	TSS	TRUE
chr2	80637200	80640399	80	35	1.95435e-12	2.40534	9.68559e-12	Gm13690	-9232	gene_body	TRUE
chr2	83643400	83645599	73	34	2.40109e-10	2.25943	9.79466e-10	Zc3h15	64	TSS	TRUE
chr2	83721600	83725599	134	50	3.09886e-25	2.82026	3.65045e-24	Itgav	-797	TSS	TRUE
chr2	84669000	84673799	129	66	7.80344e-14	2.05684	4.34023e-13	Selenoh	-630	TSS	TRUE
chr2	84674600	84679399	364	92	2.797e-108	4.1636	4.07712e-106	Med19	-1402	TSS	TRUE
chr2	84714400	84716199	112	25	7.92531e-40	4.71447	1.94318e-38	Zdhhc5	-120	TSS	TRUE
chr2	84837800	84842199	149	72	1.16379e-17	2.17775	8.6043e-17	Slc43a1	1149	TSS	TRUE
chr2	84881600	84889799	247	108	5.4705e-34	2.40673	1.02616e-32	Rtn4rl2	1009	TSS	TRUE
chr2	90677800	90679799	131	48	2.10384e-25	2.872	2.49523e-24	Nup160	1584	gene_body	TRUE
chr2	90743800	90746599	170	43	6.49354e-52	4.1604	2.47203e-50	Fnbp4	-170	TSS	TRUE
chr2	90844800	90848599	140	60	5.98479e-21	2.45545	5.45079e-20	Mtch2	-455	TSS	TRUE
chr2	90939600	90941599	99	32	1.89689e-23	3.25567	2.00577e-22	Celf1	202	TSS	TRUE
chr2	91456600	91461799	153	77	1.30472e-16	2.09101	8.91948e-16	Lrp4	1688	TSS	TRUE
chr2	91526600	91527599	55	17	8.71702e-15	3.40462	5.21763e-14	Ckap5	337	TSS	TRUE
chr2	91710000	91712599	141	40	3.48242e-38	3.70949	7.94564e-37	Harbi1	377	TSS	TRUE
chr2	91930400	91932199	69	36	5.43966e-08	2.01698	1.70109e-07	Mdk	996	gene_body	TRUE
chr2	92058000	92060199	83	41	2.7215e-10	2.13034	1.10315e-09	2900072N19Rik	268	TSS	TRUE
chr2	92427800	92435799	364	150	1.24886e-54	2.55367	5.23502e-53	Cry2	2242	TSS	TRUE
chr2	92458800	92463199	207	95	2.59684e-26	2.29299	3.24788e-25	Slc35c1	-462	TSS	TRUE
chr2	92598000	92601399	144	71	1.90611e-16	2.13432	1.28769e-15	Chst1	-7	TSS	TRUE
chr2	93042600	93047799	173	73	4.43366e-26	2.4939	5.47849e-25	Prdm11	370	TSS	TRUE
chr2	93333400	93337999	125	62	2.26932e-14	2.12165	1.31545e-13	Tspan18	-1213	TSS	TRUE
chr2	94156800	94159199	273	54	6.98907e-105	5.32015	9.59945e-103	Hsd17b12	-36	TSS	TRUE
chr2	94405800	94408399	115	35	5.14825e-29	3.45768	7.48758e-28	Ttc17	-411	TSS	TRUE
chr2	94435400	94438399	117	50	6.00503e-18	2.46247	4.52334e-17	Api5	1235	TSS	TRUE
chr2	101678200	101679599	74	31	1.6336e-12	2.51203	8.15005e-12	Traf6	459	TSS	TRUE
chr2	102192000	102193599	61	29	1.18846e-08	2.21354	4.03504e-08	Ldlrad3	-6415	intergenic	TRUE
chr2	102657400	102660199	76	33	4.56804e-12	2.42357	2.18968e-11	Slc1a2	140	TSS	TRUE
chr2	103072400	103073999	102	27	1.35695e-30	3.9755	2.14436e-29	Pdhx	312	TSS	TRUE
chr2	103484600	103485399	96	17	1.92136e-42	5.94261	5.23341e-41	Cat	159	TSS	TRUE
chr2	103565000	103569599	236	69	5.57241e-60	3.5993	2.77014e-58	Abtb2	989	TSS	TRUE
chr2	103795800	103799199	148	45	1.04899e-36	3.46102	2.2444e-35	Caprin1	148	TSS	TRUE
chr2	104589600	104592199	133	29	6.6658e-48	4.82624	2.21563e-46	Cstf3	376	TSS	TRUE
chr2	104814600	104818799	104	40	3.46626e-19	2.73608	2.82273e-18	Qser1	-4	TSS	TRUE
chr2	105016600	105017999	86	23	7.08751e-26	3.93483	8.65596e-25	Eif3m	-220	TSS	TRUE
chr2	105125400	105128399	84	40	3.84318e-11	2.20991	1.6905e-10	Wt1	370	TSS	TRUE
chr2	105398400	105401999	127	59	1.39248e-16	2.2652	9.49073e-16	Rcn1	-881	TSS	TRUE
chr2	105666600	105670199	118	59	1.86431e-13	2.10468	1.00476e-12	Pax6	-500	TSS	TRUE
chr2	105672000	105676799	170	57	1.02901e-36	3.13855	2.20479e-35	Pax6os1	-4070	gene_body	TRUE
chr2	105903800	105905799	97	20	1.56245e-37	5.10384	3.45759e-36	Immp1l	161	TSS	TRUE
chr2	106970600	106974799	124	57	1.44124e-16	2.2893	9.80306e-16	Arl14ep	1723	TSS	TRUE
chr2	109673200	109678799	195	81	6.32113e-30	2.53341	9.65813e-29	Gm45346	590	TSS	TRUE
chr2	109917000	109919199	80	28	1.88693e-17	3.00668	1.37316e-16	Lgr4	452	TSS	TRUE
chr2	110017000	110019999	100	41	9.24946e-17	2.56668	6.3997e-16	Ccdc34	537	TSS	TRUE
chr2	112249800	112252999	93	46	2.89e-11	2.12755	1.28619e-10	Nutm1	7890	gene_body	TRUE
chr2	112376200	112381999	152	76	9.55627e-17	2.10468	6.5918e-16	Katnbl1	-111	TSS	TRUE
chr2	112454200	112455799	77	24	1.30845e-19	3.37625	1.09819e-18	Emc7	2	TSS	TRUE
chr2	113748800	113750399	62	29	5.13922e-09	2.24983	1.81878e-08	Grem1	9045	gene_body	TRUE
chr2	113756200	113759199	119	58	2.83565e-14	2.15911	1.62662e-13	Grem1	945	TSS	TRUE
chr2	113820000	113822599	79	40	2.0003e-09	2.07837	7.38566e-09	Scg5	7820	gene_body	TRUE
chr2	114200600	114201999	54	21	8.36337e-11	2.70601	3.56162e-10	Zfp770	168	TSS	TRUE
chr2	114654600	114655199	41	12	2.67712e-12	3.59549	1.30959e-11	Dph6	63	TSS	TRUE
chr2	115581400	115582399	48	19	1.38042e-09	2.65854	5.18437e-09	BC052040	183	TSS	TRUE
chr2	116060200	116064399	140	45	1.92552e-32	3.27394	3.32991e-31	Meis2	3538	gene_body	TRUE
chr2	116975000	116977399	103	26	1.68408e-32	4.16888	2.91963e-31	Gm29340	227	TSS	TRUE
chr2	117118400	117123199	130	65	1.28174e-14	2.10468	7.57608e-14	Spred1	-574	TSS	TRUE
chr2	117248400	117250399	76	22	3.58246e-21	3.63535	3.30342e-20	Fam98b	-339	TSS	TRUE
chr2	118372800	118374799	89	35	3.56409e-16	2.67594	2.36375e-15	Gpr176	-381	TSS	TRUE
chr2	118387600	118389399	83	34	2.73553e-14	2.56894	1.57199e-13	Eif2ak4	-118	TSS	TRUE
chr2	118478400	118481999	122	43	3.41989e-25	2.9857	4.01346e-24	Srp14	-489	TSS	TRUE
chr2	118814000	118815599	78	29	1.09995e-15	2.83043	7.02737e-15	Knstrn	796	TSS	TRUE
chr2	118861000	118862799	96	26	3.27969e-28	3.88555	4.55727e-27	Ivd	-54	TSS	TRUE
chr2	118899000	118908199	315	140	2.09251e-41	2.36776	5.44366e-40	Bahd1	2146	TSS	TRUE
chr2	119034600	119035399	51	18	9.00404e-12	2.98162	4.21042e-11	Rpusd2	209	TSS	TRUE
chr2	119111200	119114199	86	41	2.46262e-11	2.20734	1.1042e-10	Rad51	-107	TSS	TRUE
chr2	119156200	119157199	75	17	4.3749e-27	4.64267	5.74772e-26	Rmdn3	333	TSS	TRUE
chr2	119166800	119168399	74	31	1.6336e-12	2.51203	8.15005e-12	Gchfr	-173	TSS	TRUE
chr2	119207400	119209399	122	33	2.98528e-35	3.89046	5.95975e-34	Zfyve19	-234	TSS	TRUE
chr2	119268600	119271399	100	52	8.48026e-11	2.02373	3.60834e-10	Rhov	1271	TSS	TRUE
chr2	119287200	119289999	107	41	8.63396e-20	2.74634	7.3323e-19	Vps18	-142	TSS	TRUE
chr2	119293000	119294599	91	44	1.45348e-11	2.17643	6.66295e-11	Vps18	5057	gene_body	TRUE
chr2	119325400	119328799	129	52	1.36119e-21	2.61061	1.29099e-20	Gm14207	-906	TSS	TRUE
chr2	119350200	119355999	324	137	1.1062e-46	2.48874	3.51032e-45	Chac1	1870	TSS	TRUE
chr2	119474200	119478799	142	57	1.03804e-23	2.62161	1.11896e-22	Ino80	1186	TSS	TRUE
chr2	119544800	119549399	144	70	6.22989e-17	2.16481	4.35851e-16	Exd1	526	TSS	TRUE
chr2	119593200	119595799	162	35	2.65319e-58	4.87082	1.24564e-56	1700020I14Rik	196	TSS	TRUE
chr2	119618000	119619599	135	31	3.63159e-46	4.58276	1.1302e-44	Nusap1	82	TSS	TRUE
chr2	119673600	119675999	108	26	1.09082e-35	4.37125	2.22436e-34	Rtf1	-268	TSS	TRUE
chr2	119786600	119788199	60	27	2.19884e-09	2.33853	8.08112e-09	Rpap1	103	TSS	TRUE
chr2	119796600	119801599	159	80	3.43532e-17	2.09152	2.44947e-16	Tyro3	1366	TSS	TRUE
chr2	119896600	119898399	98	41	6.22943e-16	2.51534	4.0573e-15	Mga	271	TSS	TRUE
chr2	119970800	119973799	109	48	5.21441e-16	2.38968	3.41813e-15	Mapkbp1	-399	TSS	TRUE
chr2	120153600	120154999	97	31	2.32788e-23	3.2928	2.44833e-22	Ehd4	305	TSS	TRUE
chr2	120352600	120355599	95	38	1.13311e-16	2.63084	7.78104e-16	Vps39	-963	TSS	TRUE
chr2	120403600	120406999	100	43	1.74947e-15	2.4473	1.10404e-14	Capn3	531	TSS	TRUE
chr2	120563200	120564399	53	24	1.9769e-08	2.32391	6.51822e-08	Zfp106	6	TSS	TRUE
chr2	120607400	120610399	99	47	7.56085e-13	2.21663	3.87699e-12	Haus2	-483	TSS	TRUE
chr2	120628800	120631199	107	40	1.53095e-20	2.815	1.35982e-19	Stard9	775	TSS	TRUE
chr2	120849400	120851399	209	38	2.99522e-87	5.78786	3.02792e-85	Cdan1	-272	TSS	TRUE
chr2	120970000	120970999	52	24	4.73984e-08	2.28006	1.49024e-07	Ubr1	214	TSS	TRUE
chr2	120977000	120977999	69	25	1.21509e-14	2.90445	7.19534e-14	Gm44325	226	TSS	TRUE
chr2	121007400	121009399	95	30	2.81781e-23	3.3324	2.95124e-22	Ccndbp1	-3	TSS	TRUE
chr2	121134800	121140599	159	79	1.17453e-17	2.118	8.67871e-17	Gm23858	-2404	TSS	TRUE
chr2	121169200	121172599	132	53	3.47067e-22	2.62092	3.41237e-21	Tubgcp4	-268	TSS	TRUE
chr2	121270800	121271999	129	26	4.1324e-50	5.22121	1.49388e-48	Trp53bp1	6	TSS	TRUE
chr2	121354800	121355999	57	9	1.10523e-28	6.6648	1.57897e-27	Ppip5k1	-67	TSS	TRUE
chr2	121413400	121414999	122	20	1.08496e-56	6.41926	4.89292e-55	Pdia3	424	TSS	TRUE
chr2	121448000	121450599	199	51	1.81257e-59	4.10618	8.84516e-58	Hypk	-112	TSS	TRUE
chr2	121955400	121956799	100	27	2.17947e-29	3.89755	3.24126e-28	Mageb3	-8	TSS	TRUE
chr2	122117800	122118599	79	16	1.54651e-31	5.19592	2.55516e-30	Spg11	185	TSS	TRUE
chr2	122233800	122236799	103	33	1.38973e-24	3.28457	1.57411e-23	Sord	550	TSS	TRUE
chr2	122375400	122378199	118	38	1.21336e-27	3.26778	1.6389e-26	Shf	-7638	intergenic	TRUE
chr2	122629600	122632399	133	56	1.24263e-20	2.4993	1.1106e-19	Spata5l1	353	TSS	TRUE
chr2	125122600	125125199	91	35	4.65293e-17	2.73608	3.28577e-16	Myef2	-305	TSS	TRUE
chr2	125623000	125627799	258	100	1.04979e-43	2.71503	3.01575e-42	Cep152	-287	TSS	TRUE
chr2	125672200	125673999	67	24	1.66528e-14	2.93778	9.75699e-14	Eid1	4	TSS	TRUE
chr2	125858000	125859399	76	16	2.18831e-29	4.9986	3.2512e-28	Galk2	-434	TSS	TRUE
chr2	126151800	126153799	83	34	2.73553e-14	2.56894	1.57199e-13	Dtwd1	658	TSS	TRUE
chr2	126673600	126676599	127	36	1.15103e-34	3.71241	2.23614e-33	Gabpb1	467	TSS	TRUE
chr2	126706800	126707999	64	26	1.22528e-11	2.59037	5.64808e-11	Usp8	56	TSS	TRUE
chr2	126875200	126876599	64	17	5.34819e-20	3.96174	4.60156e-19	Trpm7	329	TSS	TRUE
chr2	126932200	126934799	81	40	4.26439e-10	2.13098	1.69771e-09	Sppl2a	-265	TSS	TRUE
chr2	127244600	127249399	171	83	8.92051e-20	2.16807	7.56427e-19	Ciao1	815	TSS	TRUE
chr2	127266200	127270999	228	80	2.31341e-45	2.99916	6.98787e-44	Gm10766	1453	TSS	TRUE
chr2	127336800	127338599	67	32	3.10234e-09	2.20333	1.12232e-08	Astl	-939	gene_body	TRUE
chr2	127586000	127593399	251	128	3.8143e-25	2.06357	4.46241e-24	Mrps5	2477	TSS	TRUE
chr2	127831400	127832399	78	20	8.76734e-25	4.10412	1.00489e-23	Bub1	-35	TSS	TRUE
chr2	127838400	127839999	65	21	3.58278e-16	3.25724	2.3751e-15	Bub1	-7335	intergenic	TRUE
chr2	128122600	128130199	437	123	3.82618e-114	3.73879	6.28717e-112	Bcl2l11	360	TSS	TRUE
chr2	128685600	128688399	96	46	2.66171e-12	2.19618	1.30234e-11	Anapc1	390	TSS	TRUE
chr2	128816200	128819799	256	48	2.0743e-103	5.61247	2.74878e-101	Tmem87b	-118	TSS	TRUE
chr2	128943000	128944399	78	22	2.51826e-22	3.73101	2.49962e-21	Zc3h8	376	TSS	TRUE
chr2	128965000	128968399	178	36	6.29626e-68	5.20322	4.01291e-66	Zc3h6	-702	TSS	TRUE
chr2	129066000	129067799	77	37	3.31409e-10	2.19	1.33248e-09	Ttl	957	gene_body	TRUE
chr2	129099600	129102399	88	41	4.69307e-12	2.25868	2.24746e-11	Polr1b	4	TSS	TRUE
chr2	129128400	129131199	116	50	1.49961e-17	2.44142	1.09847e-16	Chchd5	99	TSS	TRUE
chr2	129165200	129171399	151	79	4.38126e-15	2.01143	2.6832e-14	Gm14026	-400	TSS	TRUE
chr2	129192000	129200599	304	143	9.24509e-36	2.23714	1.88992e-34	Gm4430_v1	825	TSS	TRUE
chr2	129295400	129298799	237	45	7.16417e-95	5.54231	8.40869e-93	Ckap2l	111	TSS	TRUE
chr2	129800200	129803999	178	61	3.58464e-37	3.07076	7.81017e-36	Stk35	1582	TSS	TRUE
chr2	130176600	130180199	142	55	4.11513e-25	2.71694	4.80999e-24	Snrpb	902	TSS	TRUE
chr2	130283600	130285199	62	30	1.72505e-08	2.17483	5.72604e-08	Idh3b	146	TSS	TRUE
chr2	130418400	130426999	323	157	2.54906e-35	2.165	5.09451e-34	Pced1a	1547	TSS	TRUE
chr2	130449200	130453399	130	66	3.71095e-14	2.07279	2.11077e-13	Ptpra	1021	TSS	TRUE
chr2	130629000	130630399	60	20	1.62047e-14	3.15701	9.50921e-14	Fastkd5	337	TSS	TRUE
chr2	130634000	130639799	249	118	3.02066e-29	2.22061	4.44617e-28	Lzts3	5902	gene_body	TRUE
chr2	130640800	130643799	132	51	1.36244e-23	2.7237	1.45614e-22	Lzts3	502	TSS	TRUE
chr2	130660400	130665599	201	104	6.72315e-20	2.03384	5.74954e-19	Ddrgk1	1658	TSS	TRUE
chr2	130839200	130843999	144	73	1.6388e-15	2.07584	1.03529e-14	4930402H24Rik	-1466	TSS	TRUE
chr2	131260400	131265399	211	78	5.58393e-39	2.84671	1.3142e-37	Pank2	399	TSS	TRUE
chr2	131351800	131353399	88	28	1.59769e-21	3.30735	1.50896e-20	Rnf24	280	TSS	TRUE
chr2	131490800	131496199	181	67	1.06447e-33	2.84288	1.96332e-32	Smox	1535	TSS	TRUE
chr2	132028400	132031199	128	44	2.88311e-27	3.06135	3.82507e-26	Rassf2	200	TSS	TRUE
chr2	132246000	132247999	74	35	3.55857e-10	2.22494	1.42646e-09	Tmem230	806	TSS	TRUE
chr2	132251400	132253599	181	37	2.41313e-68	5.14792	1.55555e-66	Pcna	813	TSS	TRUE
chr2	132262400	132264199	123	33	7.52939e-36	3.92235	1.55112e-34	Cds2	151	TSS	TRUE
chr2	132380400	132382199	62	30	1.72505e-08	2.17483	5.72604e-08	Prokr2	4126	gene_body	TRUE
chr2	132813400	132817399	197	75	6.57942e-35	2.76414	1.29153e-33	Trmt6	654	TSS	TRUE
chr2	134643400	134644399	88	29	1.42439e-20	3.1933	1.26853e-19	Tmx4	244	TSS	TRUE
chr2	136889400	136892199	135	41	9.69355e-34	3.46501	1.79301e-32	Mkks	588	TSS	TRUE
chr2	137113800	137118599	241	61	1.80667e-72	4.1576	1.29587e-70	Jag1	443	TSS	TRUE
chr2	138256000	138257199	56	20	1.60313e-12	2.94655	8.00425e-12	Btbd3	-70	TSS	TRUE
chr2	139677200	139679999	87	44	3.30582e-10	2.08076	1.3298e-09	Ism1	421	TSS	TRUE
chr2	140065600	140066999	73	37	7.7403e-09	2.07623	2.68403e-08	Tasp1	504	TSS	TRUE
chr2	140169600	140172399	92	46	6.26939e-11	2.10468	2.70493e-10	Ndufaf5	350	TSS	TRUE
chr2	140395000	140396599	77	18	6.40031e-27	4.50167	8.3013e-26	Macrod2	490	TSS	TRUE
chr2	142900800	142903799	92	44	6.48043e-12	2.20034	3.06877e-11	Kif16bos	-665	TSS	TRUE
chr2	143062800	143064199	72	19	2.2964e-22	3.98781	2.28896e-21	Snrpb2	460	TSS	TRUE
chr2	143912600	143917399	229	71	4.49077e-54	3.39416	1.84649e-52	Dstn	-320	TSS	TRUE
chr2	144009400	144013399	354	58	2.86917e-159	6.42289	9.19519e-157	Rrbp1	-137	TSS	TRUE
chr2	144268600	144273399	155	68	5.09983e-22	2.39871	4.97305e-21	Snx5	-94	TSS	TRUE
chr2	144367800	144369999	86	38	5.42731e-13	2.38161	2.81297e-12	Csrp2bp	-83	TSS	TRUE
chr2	144526200	144528599	106	48	7.25203e-15	2.32391	4.36823e-14	Dzank1	13	TSS	TRUE
chr2	144555400	144556599	63	20	4.36308e-16	3.31486	2.87425e-15	Sec23b	-256	TSS	TRUE
chr2	144599600	144600999	57	27	2.91082e-08	2.2216	9.41412e-08	Dtd1	402	TSS	TRUE
chr2	145902400	145903599	56	17	2.45418e-15	3.46652	1.53282e-14	Naa20	-241	TSS	TRUE
chr2	145934000	145934999	57	17	6.7921e-16	3.52843	4.41201e-15	Cfap61	-314	TSS	TRUE
chr2	146220400	146223999	86	36	3.17586e-14	2.51392	1.8174e-13	Insm1	278	TSS	TRUE
chr2	146510400	146512799	97	31	2.32788e-23	3.2928	2.44833e-22	Ralgapa2	403	TSS	TRUE
chr2	146834200	146836599	79	26	9.94718e-19	3.19749	7.86928e-18	Gm14114	4331	gene_body	TRUE
chr2	146855600	146856799	68	18	3.5022e-21	3.9755	3.23337e-20	Kiz	335	TSS	TRUE
chr2	147012000	147014199	104	30	3.10543e-28	3.6481	4.32045e-27	Xrn2	103	TSS	TRUE
chr2	148671400	148674399	267	42	7.36656e-125	6.68986	1.46643e-122	Nxt1	298	TSS	TRUE
chr2	148680400	148682399	105	32	1.19264e-26	3.45298	1.5224e-25	Gzf1	376	TSS	TRUE
chr2	150135400	150137399	154	22	8.79739e-79	7.36636	7.39603e-77	Zfp120	307	TSS	TRUE
chr2	150180600	150182199	94	11	2.1078e-56	8.9927	9.43041e-55	Gm14139	-355	TSS	TRUE
chr2	150257000	150257599	60	4	1.1101e-50	15.7851	4.07832e-49	Gm14124	-217	TSS	TRUE
chr2	150310400	150312599	104	18	1.23343e-46	6.08017	3.90446e-45	Gm14125	5738	gene_body	TRUE
chr2	150450800	150451799	51	5	1.84063e-35	10.7338	3.70322e-34	Zfp442	185	TSS	TRUE
chr2	150484200	150486799	98	24	4.84089e-32	4.29704	8.22369e-31	Zfp345	-409	TSS	TRUE
chr2	150785800	150790199	145	72	2.64044e-16	2.11929	1.7649e-15	Pygb	1264	TSS	TRUE
chr2	150903600	150905199	111	26	1.19392e-37	4.49267	2.65506e-36	Abhd12	340	TSS	TRUE
chr2	150908800	150911399	89	23	1.03861e-27	4.07209	1.41066e-26	Gins1	505	TSS	TRUE
chr2	150997000	151000199	108	53	5.78122e-13	2.14439	2.99177e-12	Gm14141	6417	gene_body	TRUE
chr2	151493200	151494999	109	48	5.21441e-16	2.38968	3.41813e-15	Nsfl1c	-82	TSS	TRUE
chr2	151740600	151742999	85	40	1.68387e-11	2.23622	7.67585e-11	Psmf1	2385	gene_body	TRUE
chr2	152225200	152227599	127	51	2.00883e-21	2.62053	1.88135e-20	Csnk2a1	-439	TSS	TRUE
chr2	152330400	152333799	144	69	1.97704e-17	2.19618	1.43516e-16	Rbck1	552	TSS	TRUE
chr2	152392600	152400199	340	143	2.38947e-49	2.50206	8.37018e-48	Sox12	1662	TSS	TRUE
chr2	152401000	152407399	213	108	6.11772e-22	2.07544	5.92599e-21	Sox12	-6137	intergenic	TRUE
chr2	152412400	152416399	171	70	3.45183e-27	2.57071	4.55354e-26	Zcchc3	626	TSS	TRUE
chr2	152734200	152744399	367	183	1.2242e-37	2.11043	2.72106e-36	Id1	3048	TSS	TRUE
chr2	152823600	152831799	368	139	5.79817e-64	2.78604	3.27101e-62	Bcl2l1	4027	TSS	TRUE
chr2	153013600	153015799	104	44	1.81914e-16	2.48734	1.2304e-15	Pdrg1	726	TSS	TRUE
chr2	153344800	153347399	107	40	1.53095e-20	2.815	1.35982e-19	Asxl1	254	TSS	TRUE
chr2	153525200	153526199	59	21	3.8687e-13	2.95657	2.03089e-12	Nol4l	4270	gene_body	TRUE
chr2	153632000	153634799	103	47	2.64868e-14	2.30619	1.52421e-13	Commd7	-619	TSS	TRUE
chr2	153740600	153743399	112	46	1.83743e-18	2.56221	1.43006e-17	Mapre1	725	TSS	TRUE
chr2	154403000	154406399	91	42	1.29925e-12	2.28006	6.53102e-12	Snta1	3398	gene_body	TRUE
chr2	154435000	154438399	175	59	1.95033e-37	3.12134	4.30121e-36	Cbfa2t2	218	TSS	TRUE
chr2	154565600	154572199	264	106	4.09643e-42	2.62092	1.09792e-40	E2f1	991	TSS	TRUE
chr2	154602400	154607599	242	89	1.02745e-44	2.86141	3.04051e-43	Pxmp4	-1292	TSS	TRUE
chr2	154613000	154616599	134	54	2.3521e-22	2.61136	2.34163e-21	4930519P11Rik	-1363	TSS	TRUE
chr2	154789400	154793199	202	56	3.90703e-55	3.79593	1.67984e-53	a	-102	TSS	TRUE
chr2	154890000	154893399	115	44	3.73481e-21	2.75043	3.44004e-20	Eif2s2	1234	TSS	TRUE
chr2	155073800	155074599	79	10	1.99535e-45	8.31347	6.05343e-44	Gm45609	18	TSS	TRUE
chr2	155236200	155237999	125	22	9.48995e-55	5.97919	4.01904e-53	Dynlrb1	564	TSS	TRUE
chr2	155275000	155279999	175	86	1.12577e-19	2.14138	9.48296e-19	Map1lc3a	1202	TSS	TRUE
chr2	155377800	155387399	319	159	4.88263e-33	2.11129	8.69675e-32	Trp53inp2	785	TSS	TRUE
chr2	155516600	155519599	123	56	9.51353e-17	2.31138	6.56733e-16	Acss2	42	TSS	TRUE
chr2	155728600	155730199	91	39	2.33677e-14	2.45545	1.35342e-13	Edem2	74	TSS	TRUE
chr2	155773000	155774999	72	31	1.06234e-11	2.44414	4.92968e-11	Mmp24	-1342	intergenic	TRUE
chr2	155826000	155828399	94	33	4.91803e-20	2.99757	4.24479e-19	Eif6	-275	TSS	TRUE
chr2	155956000	155956999	84	18	1.07814e-31	4.91091	1.79114e-30	Cep250	-58	TSS	TRUE
chr2	156007400	156011399	187	75	1.47338e-30	2.62383	2.32306e-29	Ergic3	1354	TSS	TRUE
chr2	156110800	156112199	70	23	6.98287e-17	3.20277	4.87248e-16	Cpne1	442	TSS	TRUE
chr2	156141800	156144599	128	64	2.00199e-14	2.10468	1.16647e-13	Romo1	-839	TSS	TRUE
chr2	156178400	156182399	174	65	4.93855e-32	2.81703	8.38645e-31	Rbm39	-162	TSS	TRUE
chr2	156196000	156197599	133	29	6.6658e-48	4.82624	2.21563e-46	Phf20	157	TSS	TRUE
chr2	156310200	156313399	106	38	1.17744e-21	2.93547	1.12333e-20	Cnbd2	-499	TSS	TRUE
chr2	156439600	156443199	102	51	6.66807e-12	2.10468	3.15515e-11	Gm14225	6207	gene_body	TRUE
chr2	156719000	156728199	259	136	3.51026e-24	2.00408	3.89782e-23	4930405A21Rik	-2691	TSS	TRUE
chr2	156991000	156992799	73	27	6.3019e-15	2.84521	3.8127e-14	Ndrg3	155	TSS	TRUE
chr2	157006000	157007999	105	45	3.02963e-16	2.45545	2.01803e-15	Dsn1	153	TSS	TRUE
chr2	157204000	157206599	118	55	1.85597e-15	2.25774	1.1684e-14	Rbl1	-788	TSS	TRUE
chr2	157278800	157279799	242	25	1.91436e-152	10.1866	5.54528e-150	Rpn2	240	TSS	TRUE
chr2	157366400	157368999	90	42	3.01877e-12	2.25501	1.46901e-11	Manbal	105	TSS	TRUE
chr2	157579400	157582199	82	43	4.80991e-09	2.00678	1.70718e-08	Blcap	-9526	intergenic	TRUE
chr2	157737000	157738799	71	20	1.47353e-20	3.7358	1.31062e-19	Ctnnbl1	498	TSS	TRUE
chr2	158024800	158029799	186	82	9.41917e-26	2.38701	1.14141e-24	Tti1	1132	TSS	TRUE
chr2	158624600	158626399	107	42	4.56692e-19	2.68096	3.69606e-18	Actr5	611	TSS	TRUE
chr2	158767600	158773199	288	121	3.06692e-42	2.50474	8.26405e-41	Fam83d	2306	TSS	TRUE
chr2	158791200	158795399	152	69	2.60158e-20	2.31819	2.27852e-19	Dhx35	-1507	TSS	TRUE
chr2	160591200	160592999	72	35	1.8221e-09	2.16481	6.76168e-09	Gm14222	8742	gene_body	TRUE
chr2	160642800	160647599	154	67	3.18582e-22	2.41881	3.14257e-21	Top1	-688	TSS	TRUE
chr2	160870000	160875399	168	70	5.92837e-26	2.52561	7.28758e-25	Zhx3	297	TSS	TRUE
chr2	161107400	161112599	200	81	5.38869e-32	2.59836	9.12683e-31	Gm45447	588	TSS	TRUE
chr2	162928400	162933799	183	70	2.38595e-32	2.75111	4.11513e-31	Srsf6	-428	TSS	TRUE
chr2	163202200	163206599	126	65	2.54395e-13	2.03992	1.35689e-12	Tox2	1274	TSS	TRUE
chr2	163467800	163473199	201	99	3.54459e-22	2.13656	3.48316e-21	2310001K24Rik	-1457	TSS	TRUE
chr2	163644200	163646199	126	38	6.32254e-32	3.48933	1.06566e-30	Serinc3	-69	TSS	TRUE
chr2	163691200	163693799	88	39	3.53482e-13	2.37451	1.86352e-12	Gm16316	-221	TSS	TRUE
chr2	163853400	163855799	80	41	2.7111e-09	2.05334	9.87419e-09	Kcnk15	866	TSS	TRUE
chr2	164070200	164076599	286	112	2.22493e-47	2.68722	7.24353e-46	Stk4	-738	TSS	TRUE
chr2	164495600	164499199	140	57	7.24498e-23	2.58469	7.39021e-22	Pigt	-120	TSS	TRUE
chr2	164767000	164772399	400	101	7.5041e-119	4.16767	1.36183e-116	Gm11457	-34	TSS	TRUE
chr2	164781600	164788399	270	128	1.67776e-31	2.21977	2.76645e-30	Snx21	-991	TSS	TRUE
chr2	164801600	164807999	466	92	2.37152e-177	5.33032	9.2383e-175	Acot8	81	TSS	TRUE
chr2	164832600	164839999	272	143	3.24883e-25	2.00165	3.82014e-24	Neurl2	-2844	TSS	TRUE
chr2	164878400	164881799	174	62	2.13689e-34	2.95333	4.0916e-33	Pcif1	734	TSS	TRUE
chr2	165033200	165035199	91	36	2.44028e-16	2.66008	1.63437e-15	Ncoa5	666	TSS	TRUE
chr2	166154200	166156199	92	24	2.82827e-28	4.03396	3.9531e-27	Sulf2	462	TSS	TRUE
chr2	166902600	166907599	222	96	2.06871e-31	2.43353	3.40302e-30	Cse1l	-959	TSS	TRUE
chr2	166995200	166998599	137	54	1.22036e-23	2.66982	1.30987e-22	Stau1	-622	TSS	TRUE
chr2	167238600	167240599	86	43	2.41099e-10	2.10468	9.82751e-10	Ptgis	988	TSS	TRUE
chr2	167419400	167425599	206	104	1.7126e-21	2.08444	1.61446e-20	Slc9a8	787	TSS	TRUE
chr2	167490600	167493599	147	66	4.01642e-20	2.34384	3.48558e-19	Rnf114	-545	TSS	TRUE
chr2	167930200	167934399	201	60	3.86332e-50	3.52533	1.39772e-48	Ptpn1	-27	TSS	TRUE
chr2	168229400	168231999	97	27	1.30339e-27	3.78062	1.75577e-26	Mocs3	77	TSS	TRUE
chr2	168765000	168767999	95	42	4.0144e-14	2.38029	2.27821e-13	Gm14261	356	TSS	TRUE
chr2	168954600	168956399	132	44	2.90662e-29	3.15701	4.28181e-28	Zfp64	86	TSS	TRUE
chr2	170285600	170289999	124	61	1.63279e-14	2.13918	9.57967e-14	Gm14270	2764	gene_body	TRUE
chr2	170506600	170514599	242	115	2.52333e-28	2.21448	3.53344e-27	Gm16796	1326	TSS	TRUE
chr2	172281800	172284199	71	36	1.21599e-08	2.07544	4.12151e-08	Gm14275	-5133	intergenic	TRUE
chr2	172342800	172346399	140	33	1.57567e-46	4.46446	4.96177e-45	Fam210b	-965	TSS	TRUE
chr2	172369600	172373599	162	81	1.0344e-17	2.10468	7.67275e-17	Cstf1	865	TSS	TRUE
chr2	172439200	172443599	158	66	1.9616e-24	2.51923	2.20444e-23	Gm14455	-840	TSS	TRUE
chr2	172999600	173002199	109	39	2.88084e-22	2.94115	2.84607e-21	Rae1	782	TSS	TRUE
chr2	173657200	173660599	218	61	1.19453e-58	3.76081	5.67598e-57	Ppp4r1l-ps	638	TSS	TRUE
chr2	174071800	174077199	213	88	8.71102e-33	2.54714	1.53165e-31	Stx16	-2422	TSS	TRUE
chr2	174284200	174287199	115	60	4.90047e-12	2.01698	2.34182e-11	Gm27899	-908	TSS	TRUE
chr2	174294600	174296599	109	33	8.37947e-28	3.4759	1.14327e-26	Nespas	-164	TSS	TRUE
chr2	174297400	174300999	152	73	3.37052e-18	2.19117	2.57951e-17	Nespas	-3764	gene_body	TRUE
chr2	174344000	174347199	95	48	5.48457e-11	2.08275	2.37574e-10	Gm20721	1111	TSS	TRUE
chr2	174460200	174465199	323	91	5.89455e-85	3.73522	5.76543e-83	Atp5e	1404	TSS	TRUE
chr2	174469200	174474799	219	91	2.60534e-33	2.53255	4.7111e-32	Slmo2	1080	TSS	TRUE
chr2	177073400	177074799	114	39	1.07081e-24	3.07606	1.22099e-23	Gm14401	-220	TSS	TRUE
chr2	177272000	177272599	107	18	5.01271e-49	6.25556	1.73574e-47	Gm14409	-5264	intergenic	TRUE
chr2	177326800	177330999	354	113	4.65713e-79	3.2967	3.99329e-77	Gm14412	-4593	intergenic	TRUE
chr2	177759000	177759599	47	13	1.18059e-14	3.8046	6.99745e-14	Gm14322	11	TSS	TRUE
chr2	177839000	177840999	66	24	5.00058e-14	2.89393	2.81982e-13	Gm14325	317	TSS	TRUE
chr2	177925400	177926399	65	19	3.11848e-18	3.6001	2.39412e-17	Zfp972	-296	TSS	TRUE
chr2	177956200	177957599	65	8	1.43374e-38	8.55024	3.31565e-37	Gm14326	387	TSS	TRUE
chr2	178023000	178024599	67	11	2.78742e-32	6.40969	4.78201e-31	Zfp971	420	TSS	TRUE
chr2	179443000	179444999	72	35	1.8221e-09	2.16481	6.76168e-09	Cdh4	1568	gene_body	TRUE
chr2	180041600	180046999	247	89	4.88353e-47	2.92053	1.57177e-45	Ss18l1	1790	TSS	TRUE
chr2	180069800	180072799	110	53	1.18373e-13	2.1841	6.49156e-13	Mtg2	707	TSS	TRUE
chr2	180106800	180120399	591	301	2.30283e-56	2.06622	1.02826e-54	Osbpl2	-5706	TSS	TRUE
chr2	180708600	180713199	148	70	2.52219e-18	2.22494	1.94959e-17	Gid8	782	TSS	TRUE
chr2	180919600	180921399	88	34	1.87147e-16	2.7237	1.26466e-15	Ythdf1	448	TSS	TRUE
chr2	181286800	181288199	47	21	7.3433e-08	2.35523	2.26042e-07	Gmeb2	534	TSS	TRUE
chr2	181317000	181322599	148	69	7.56052e-19	2.25719	6.02814e-18	Rtel1	60	TSS	TRUE
chr2	181363600	181366399	167	65	6.55384e-29	2.7037	9.4709e-28	Arfrp1	403	TSS	TRUE
chr2	181491800	181497999	288	149	1.34284e-27	2.03405	1.80757e-26	Abhd16b	1693	TSS	TRUE
chr2	181520000	181521599	96	24	9.08392e-31	4.20935	1.44638e-29	Dnajc5	314	TSS	TRUE
chr2	181595400	181602799	266	137	6.35098e-26	2.04322	7.7764e-25	Samd10	111	TSS	TRUE
chr2	181837400	181839799	72	31	1.06234e-11	2.44414	4.92968e-11	Pcmtd2	745	TSS	TRUE
chr2	181864000	181864999	62	31	5.40195e-08	2.10468	1.68994e-07	Polr3k	162	TSS	TRUE
chr3	5574200	5577599	102	42	6.2008e-17	2.55568	4.33917e-16	Pex2	249	TSS	TRUE
chr3	8922200	8924999	143	58	1.85893e-23	2.59456	1.96632e-22	Mrps28	317	TSS	TRUE
chr3	9249800	9252599	115	41	1.72513e-23	2.95168	1.82864e-22	Zbtb10	597	TSS	TRUE
chr3	10350400	10351599	68	26	2.13009e-13	2.75227	1.14351e-12	Zfand1	316	TSS	TRUE
chr3	10439200	10440599	63	28	5.84774e-10	2.36776	2.29272e-09	Snx16	201	TSS	TRUE
chr3	14532600	14534399	102	29	3.26794e-28	3.70133	4.54235e-27	Lrrcc1	-288	TSS	TRUE
chr3	14578200	14580999	86	28	1.78422e-20	3.23218	1.57872e-19	E2f5	958	TSS	TRUE
chr3	14610000	14611799	98	36	1.71505e-19	2.8647	1.42567e-18	1810022K09Rik	384	TSS	TRUE
chr3	14641000	14642199	57	27	2.91082e-08	2.2216	9.41412e-08	Car13	-127	TSS	TRUE
chr3	16182800	16184599	80	33	1.07226e-13	2.55112	5.89743e-13	Ythdf3	487	TSS	TRUE
chr3	17793800	17795799	77	27	7.77739e-17	3.00111	5.41309e-16	Mir124-2hg	-96	TSS	TRUE
chr3	19161400	19164199	118	45	9.30299e-22	2.75946	8.93293e-21	Armc1	264	TSS	TRUE
chr3	19309800	19313399	102	51	6.66807e-12	2.10468	3.15515e-11	Pde7a	-278	TSS	TRUE
chr3	19693200	19695799	98	47	1.70596e-12	2.19424	8.49933e-12	Crh	895	TSS	TRUE
chr3	19894400	19896199	129	32	7.70579e-41	4.24224	1.95623e-39	4632415L05Rik	401	TSS	TRUE
chr3	20056400	20059199	166	42	9.77142e-51	4.15924	3.59862e-49	Hltf	-11	TSS	TRUE
chr3	27153200	27155599	134	52	9.43251e-24	2.71179	1.02044e-22	1700125G22Rik	373	TSS	TRUE
chr3	27937400	27939999	112	46	1.83743e-18	2.56221	1.43006e-17	Pld1	4	TSS	TRUE
chr3	28779800	28781999	84	25	2.06174e-22	3.53585	2.06051e-21	1700112D23Rik	207	TSS	TRUE
chr3	28804800	28806399	70	25	4.03823e-15	2.94655	2.48187e-14	Rpl22l1	163	TSS	TRUE
chr3	29081400	29083399	81	38	4.08493e-11	2.24314	1.78953e-10	Egfem1	-333	TSS	TRUE
chr3	30789400	30794199	177	72	2.29594e-28	2.587	3.22552e-27	Sec62	-1075	TSS	TRUE
chr3	30994800	30997799	130	56	1.96839e-19	2.44293	1.63057e-18	Prkci	552	TSS	TRUE
chr3	31095000	31098199	113	45	1.46044e-19	2.64254	1.22065e-18	Skil	1538	TSS	TRUE
chr3	31309000	31310399	75	37	1.64286e-09	2.13312	6.11939e-09	Slc7a14	677	TSS	TRUE
chr3	32363800	32366999	129	62	9.77889e-16	2.18954	6.27282e-15	Zmat3	277	TSS	TRUE
chr3	32396200	32401399	166	74	9.53747e-23	2.36065	9.68058e-22	Pik3ca	1128	TSS	TRUE
chr3	32510200	32513599	149	73	3.60301e-17	2.14792	2.5664e-16	Gm37592	443	TSS	TRUE
chr3	32528200	32529999	91	24	1.15725e-27	3.99011	1.56592e-26	Mfn1	-365	TSS	TRUE
chr3	32706200	32710199	265	71	1.81381e-74	3.92774	1.36832e-72	Actl6a	-307	TSS	TRUE
chr3	32736400	32739199	153	61	1.16688e-25	2.63947	1.40573e-24	Mrpl47	-653	TSS	TRUE
chr3	33798800	33800799	102	33	4.62765e-24	3.25268	5.08979e-23	Ttc14	-32	TSS	TRUE
chr3	34017800	34021399	102	41	1.32107e-17	2.61801	9.71779e-17	Gm43077	281	TSS	TRUE
chr3	35754000	35754999	46	12	2.70511e-15	4.03396	1.68384e-14	Atp11b	365	TSS	TRUE
chr3	36000200	36001199	87	20	1.32667e-30	4.57767	2.09834e-29	Mccc1	-91	TSS	TRUE
chr3	36474600	36476799	118	35	1.14168e-30	3.54788	1.80955e-29	Mir7009	-176	TSS	TRUE
chr3	36550000	36554999	168	80	3.07516e-20	2.20991	2.68367e-19	Exosc9	-106	TSS	TRUE
chr3	36611600	36614999	104	46	2.98063e-15	2.3792	1.84796e-14	Bbs7	176	TSS	TRUE
chr3	36862400	36864199	67	22	2.88449e-16	3.20485	1.92361e-15	4932438A13Rik	193	TSS	TRUE
chr3	37310400	37313799	174	58	7.90949e-38	3.15701	1.76938e-36	Cetn4	345	TSS	TRUE
chr3	37418000	37422399	241	93	2.82657e-41	2.72703	7.30286e-40	Nudt6	-14	TSS	TRUE
chr3	37639800	37644799	182	95	7.42499e-18	2.01606	5.56557e-17	Gm42922	-1644	TSS	TRUE
chr3	38482400	38485399	194	55	1.18316e-51	3.71188	4.45912e-50	Ankrd50	943	TSS	TRUE
chr3	40744200	40745999	99	35	8.90098e-21	2.97661	8.0315e-20	Hspa4l	-330	TSS	TRUE
chr3	40799000	40801199	131	39	1.24106e-33	3.53477	2.28528e-32	Plk4	80	TSS	TRUE
chr3	40846200	40847799	66	23	7.31931e-15	3.01975	4.4067e-14	Abhd18	29	TSS	TRUE
chr3	40893800	40896399	131	38	1.03073e-34	3.6278	2.00762e-33	6430590A07Rik	-977	TSS	TRUE
chr3	41080800	41084399	188	74	1.12429e-31	2.67351	1.86575e-30	Pgrmc2	445	TSS	TRUE
chr3	41740800	41742799	111	41	1.30935e-21	2.84901	1.24287e-20	Sclt1	713	TSS	TRUE
chr3	45375200	45381999	256	129	2.66269e-26	2.08836	3.3284e-25	Pcdh10	174	TSS	TRUE
chr3	51273600	51277999	211	48	2.21929e-71	4.6259	1.53576e-69	4930577N17Rik	-959	TSS	TRUE
chr3	51339200	51343999	185	68	9.14888e-35	2.86298	1.78429e-33	Elf2	-937	TSS	TRUE
chr3	51408000	51413799	176	92	2.80448e-17	2.01317	2.01348e-16	Ndufc1	-1912	TSS	TRUE
chr3	51414600	51417399	136	43	2.85695e-32	3.32832	4.89293e-31	Naa15	851	TSS	TRUE
chr3	51479600	51486599	245	128	2.90504e-23	2.01424	3.04013e-22	Rab33b	-866	TSS	TRUE
chr3	51559400	51564799	240	113	1.20282e-28	2.23505	1.71406e-27	Setd7	-1221	TSS	TRUE
chr3	52069000	52071199	70	35	8.84894e-09	2.10468	3.04718e-08	5430420F09Rik	3286	gene_body	TRUE
chr3	52100200	52109599	398	142	1.97044e-75	2.94951	1.51429e-73	Maml3	175	TSS	TRUE
chr3	52266400	52270999	222	52	9.51457e-73	4.49267	6.86812e-71	Foxo1	363	TSS	TRUE
chr3	53462800	53465199	137	30	4.61312e-49	4.80567	1.60167e-47	Proser1	333	TSS	TRUE
chr3	53654400	53657599	160	81	4.65995e-17	2.07869	3.29021e-16	Frem2	1354	TSS	TRUE
chr3	53862800	53864199	71	22	2.18069e-18	3.39618	1.6914e-17	Ufm1	329	TSS	TRUE
chr3	54689600	54693399	276	96	4.14982e-55	3.02547	1.78253e-53	Supt20	-1325	TSS	TRUE
chr3	55112000	55113999	120	36	1.021e-30	3.50779	1.62225e-29	Spg20	891	TSS	TRUE
chr3	56183400	56184399	57	15	3.06255e-18	3.99888	2.35338e-17	Nbea	-199	TSS	TRUE
chr3	57571800	57577199	274	98	1.67638e-52	2.94225	6.54165e-51	Wwtr1	1327	TSS	TRUE
chr3	57651200	57652599	55	20	4.84822e-12	2.89393	2.31881e-11	Commd2	-185	TSS	TRUE
chr3	57735200	57738199	191	51	1.34079e-54	3.94111	5.60996e-53	Rnf13	637	TSS	TRUE
chr3	57845600	57848399	115	46	9.93644e-20	2.63084	8.40681e-19	Pfn2	1078	TSS	TRUE
chr3	58413800	58417399	209	72	6.58249e-43	3.0547	1.82373e-41	Tsc22d2	884	TSS	TRUE
chr3	58522600	58526599	198	80	7.97024e-32	2.60454	1.33343e-30	Eif2a	-1221	TSS	TRUE
chr3	58575600	58576999	73	29	1.93781e-13	2.64899	1.04332e-12	Selenot	-336	TSS	TRUE
chr3	59005000	59007599	83	42	8.12752e-10	2.07962	3.13274e-09	Gm43570	-142	TSS	TRUE
chr3	61362200	61366799	390	92	7.81136e-125	4.461	1.54816e-122	B430305J03Rik	1450	TSS	TRUE
chr3	62336800	62340599	106	52	9.03371e-13	2.14515	4.60142e-12	Arhgef26	355	TSS	TRUE
chr3	63963600	63965399	96	40	9.36016e-16	2.52561	6.01275e-15	Slc33a1	165	TSS	TRUE
chr3	63975800	63977399	90	38	1.3976e-14	2.49238	8.23562e-14	Gmps	493	TSS	TRUE
chr3	65109000	65109999	53	25	7.1306e-08	2.23096	2.19921e-07	Kcnab1	115	TSS	TRUE
chr3	65389600	65396599	277	121	6.56534e-38	2.40907	1.47306e-36	Gm5540	-237	TSS	TRUE
chr3	65527600	65530399	172	44	7.54506e-52	4.11368	2.86269e-50	Tiparp	589	TSS	TRUE
chr3	65658000	65662399	153	75	1.48251e-17	2.14677	1.08656e-16	Mir8120	911	TSS	TRUE
chr3	65956200	65958799	131	44	9.277e-29	3.1331	1.32829e-27	Gm37305	-258	TSS	TRUE
chr3	65973800	65976799	140	58	3.28847e-22	2.54013	3.23922e-21	Gm37078	5385	intergenic	TRUE
chr3	66219800	66221599	65	34	1.34463e-07	2.01182	3.9948e-07	Ptx3	789	TSS	TRUE
chr3	66977000	66984199	237	117	1.22946e-25	2.13166	1.47757e-24	Rsrc1	-790	TSS	TRUE
chr3	66985400	66987999	112	44	7.88343e-20	2.67868	6.72144e-19	Shox2	-4929	gene_body	TRUE
chr3	67373800	67375599	77	36	9.90613e-11	2.25083	4.1849e-10	Gm17402	462	TSS	TRUE
chr3	67462400	67464799	94	48	1.16466e-10	2.06083	4.89024e-10	Lxn	325	TSS	TRUE
chr3	67581600	67583999	98	44	4.10116e-14	2.34384	2.32555e-13	Mfsd1	58	TSS	TRUE
chr3	69003400	69009599	245	88	6.70167e-47	2.9298	2.14321e-45	Smc4	1761	TSS	TRUE
chr3	69126200	69127799	56	21	1.02452e-11	2.80623	4.76321e-11	Kpna4	112	TSS	TRUE
chr3	69316000	69319399	196	90	5.28084e-25	2.29176	6.1321e-24	Ppm1l	838	TSS	TRUE
chr3	69596000	69600599	134	65	5.73044e-16	2.16943	3.74093e-15	B3galnt1	659	TSS	TRUE
chr3	75555000	75557999	166	51	2.43855e-40	3.42526	6.07459e-39	Pdcd10	355	TSS	TRUE
chr3	75952800	75957999	259	94	1.14251e-48	2.89953	3.90823e-47	Gm37256	-701	TSS	TRUE
chr3	79284800	79288199	192	53	8.53029e-53	3.81224	3.35772e-51	Rapgef2	16	TSS	TRUE
chr3	79566200	79568399	132	34	4.52431e-40	4.08555	1.12147e-38	Fnip2	495	TSS	TRUE
chr3	79628200	79629799	136	57	3.24406e-21	2.51084	3.00148e-20	4930579G24Rik	-79	TSS	TRUE
chr3	79877200	79879399	78	33	7.17341e-13	2.48734	3.68501e-12	Fam198b	-6233	gene_body	TRUE
chr3	81036600	81039599	132	55	7.31829e-21	2.52561	6.63654e-20	Pdgfc	1683	gene_body	TRUE
chr3	83055200	83056599	102	34	3.92382e-23	3.15701	4.07609e-22	Plrg1	377	TSS	TRUE
chr3	83839800	83841999	89	44	7.08289e-11	2.12859	3.04039e-10	Tlr2	866	TSS	TRUE
chr3	84037600	84040999	166	56	1.33145e-35	3.11943	2.70043e-34	D930015E06Rik	874	TSS	TRUE
chr3	84477200	84483399	292	132	2.66184e-37	2.3279	5.83051e-36	Fhdc1	128	TSS	TRUE
chr3	84582000	84583599	106	19	4.03135e-46	5.87094	1.25288e-44	Arfip1	-266	TSS	TRUE
chr3	84811000	84816599	239	112	8.23879e-29	2.24561	1.18377e-27	Fbxw7	-1468	TSS	TRUE
chr3	85571200	85574999	157	75	6.24628e-19	2.20289	5.01344e-18	Gm15535	844	TSS	TRUE
chr3	86222600	86225599	143	55	1.48782e-25	2.73608	1.77932e-24	Lrba	-580	TSS	TRUE
chr3	86273200	86275199	70	35	8.84894e-09	2.10468	3.04718e-08	Gm26343	1161	gene_body	TRUE
chr3	86910800	86911799	49	16	1.45996e-12	3.22278	7.31118e-12	Dclk2	9551	gene_body	TRUE
chr3	86998800	87000999	86	40	7.29491e-12	2.26253	3.43915e-11	Cd1d1	-459	TSS	TRUE
chr3	87171200	87175599	173	78	4.06724e-23	2.33403	4.21151e-22	Kirrel	1346	TSS	TRUE
chr3	87904800	87909799	224	98	5.3267e-31	2.40534	8.615e-30	Hdgf	978	TSS	TRUE
chr3	87970400	87976599	247	127	2.55603e-24	2.04667	2.86002e-23	Nes	2406	TSS	TRUE
chr3	88080800	88082599	71	28	2.83645e-13	2.66843	1.50935e-12	Iqgap3	-271	TSS	TRUE
chr3	88294800	88298399	207	73	4.25215e-41	2.98403	1.0868e-39	Tsacc	398	TSS	TRUE
chr3	88683600	88687599	211	94	2.35915e-28	2.36216	3.30764e-27	2810403A07Rik	-203	TSS	TRUE
chr3	88949600	88951999	121	41	2.02471e-26	3.10568	2.54783e-25	Ash1l	177	TSS	TRUE
chr3	89100200	89103399	146	60	2.2007e-23	2.56069	2.31699e-22	Fdps	158	TSS	TRUE
chr3	89213200	89216399	174	72	4.01673e-27	2.54315	5.28715e-26	Thbs3	-380	TSS	TRUE
chr3	89298400	89300599	73	27	6.3019e-15	2.84521	3.8127e-14	Gm22642	-2978	intergenic	TRUE
chr3	89375000	89397399	1170	522	4.03544e-146	2.35869	1.11873e-143	Gm15417	-5650	TSS	TRUE
chr3	89398200	89416399	990	392	6.28581e-155	2.65769	1.85649e-152	Flad1	4569	TSS	TRUE
chr3	89417600	89429199	570	220	2.77121e-94	2.72651	3.19453e-92	Shc1	4956	TSS	TRUE
chr3	89770800	89777199	274	144	2.09155e-25	2.00236	2.48195e-24	Ube2q1	383	TSS	TRUE
chr3	89996400	89999799	111	53	5.28595e-14	2.20395	2.97721e-13	Hax1	596	TSS	TRUE
chr3	90051000	90053599	153	36	1.04673e-50	4.47243	3.84863e-49	Ubap2l	164	TSS	TRUE
chr3	90291400	90298199	409	111	8.55378e-112	3.87753	1.3515e-109	4930537H20Rik	-817	TSS	TRUE
chr3	90428200	90434799	319	150	1.92267e-37	2.23797	4.24227e-36	Ints3	2028	TSS	TRUE
chr3	90488400	90491199	108	56	1.41591e-11	2.02951	6.49663e-11	Snapin	1232	TSS	TRUE
chr3	93554000	93555799	76	21	2.5359e-22	3.80846	2.51602e-21	S100a10	-180	TSS	TRUE
chr3	94308200	94311799	136	66	3.67625e-16	2.16845	2.43278e-15	Them4	-89	TSS	TRUE
chr3	94412400	94414999	152	53	2.6339e-31	3.01802	4.31235e-30	Gm42463	298	TSS	TRUE
chr3	94579800	94583799	138	61	1.42742e-19	2.3807	1.19449e-18	Snx27	915	TSS	TRUE
chr3	94837600	94839399	66	19	8.35915e-19	3.65549	6.63913e-18	Pogz	932	gene_body	TRUE
chr3	95003400	95016999	1314	339	0	4.07897	0	Zfp687	5236	TSS	TRUE
chr3	95105200	95107199	80	32	2.25225e-14	2.63084	1.30623e-13	Pip5k1a	729	TSS	TRUE
chr3	95109400	95111399	63	27	1.44067e-10	2.45545	6.00035e-10	Vps72	-622	TSS	TRUE
chr3	95159200	95164799	252	122	2.7848e-28	2.17368	3.89476e-27	Sema6c	1494	TSS	TRUE
chr3	95434200	95434999	57	25	2.12643e-09	2.39933	7.82869e-09	Arnt	209	TSS	TRUE
chr3	95588400	95589999	213	27	1.40946e-117	8.30177	2.51743e-115	Golph3l	265	TSS	TRUE
chr3	95620400	95636599	999	364	2.0169e-179	2.88815	8.13749e-177	Ensa	3488	TSS	TRUE
chr3	95650000	95660999	405	196	3.94711e-44	2.17447	1.14702e-42	Mcl1	-3288	TSS	TRUE
chr3	95817800	95819999	155	49	1.86751e-36	3.32882	3.95357e-35	Rprd2	-142	TSS	TRUE
chr3	95893600	95896399	118	54	5.33384e-16	2.29955	3.49363e-15	Aph1a	1030	TSS	TRUE
chr3	95920600	95921999	59	27	5.28616e-09	2.29955	1.86669e-08	Anp32e	-7946	intergenic	TRUE
chr3	95927600	95930999	356	64	4.26845e-148	5.85363	1.19803e-145	Anp32e	53	TSS	TRUE
chr3	96056800	96058599	89	37	8.18157e-15	2.5313	4.91079e-14	Vps45	765	TSS	TRUE
chr3	96104000	96105599	77	21	6.46017e-23	3.85857	6.6113e-22	Otud7b	272	TSS	TRUE
chr3	96219000	96221999	138	62	5.35096e-19	2.3423	4.30938e-18	Gm44492	-1	TSS	TRUE
chr3	96262200	96264599	117	49	1.41335e-18	2.51272	1.10783e-17	Hist2h4	-89	TSS	TRUE
chr3	96266200	96270199	138	65	2.28099e-17	2.23419	1.64772e-16	Hist2h3b	-454	TSS	TRUE
chr3	96273600	96278999	206	101	6.75057e-23	2.14635	6.89678e-22	Gm20628	-6011	gene_body	TRUE
chr3	96496400	96497799	59	22	2.49467e-12	2.82218	1.22319e-11	Gm22614	8370	intergenic	TRUE
chr3	96592600	96605799	598	252	1.16317e-84	2.49721	1.12311e-82	Lix1l	-1949	TSS	TRUE
chr3	96629000	96631799	100	39	3.84759e-18	2.6983	2.93517e-17	Rbm8a	466	TSS	TRUE
chr3	96669000	96672199	93	40	1.53772e-14	2.44668	9.03829e-14	Ankrd35	468	TSS	TRUE
chr3	96904600	96905399	64	20	1.26796e-16	3.36748	8.68128e-16	Gja5	306	TSS	TRUE
chr3	97156600	97162399	186	88	1.80176e-22	2.22426	1.80889e-21	Acp6	722	TSS	TRUE
chr3	98011200	98014199	146	65	2.58268e-20	2.36371	2.26394e-19	Notch2	-838	TSS	TRUE
chr3	98382200	98385999	152	72	1.04497e-18	2.2216	8.25816e-18	Zfp697	1638	TSS	TRUE
chr3	100159400	100162999	179	70	1.36856e-30	2.69098	2.16157e-29	Gdap2	-1181	TSS	TRUE
chr3	100683000	100686599	103	48	9.28922e-14	2.25814	5.14224e-13	Man1a2	702	TSS	TRUE
chr3	100916800	100929799	717	269	1.34688e-123	2.80493	2.60098e-121	Trim45	806	TSS	TRUE
chr3	100966000	100970199	191	50	7.69111e-56	4.01993	3.39069e-54	Ttf2	1562	TSS	TRUE
chr3	101107800	101110799	101	48	4.85285e-13	2.21429	2.52799e-12	Ptgfrn	977	TSS	TRUE
chr3	101603000	101605199	111	37	5.66452e-25	3.15701	6.56919e-24	Atp1a1	583	TSS	TRUE
chr3	102010400	102013199	84	36	2.05999e-13	2.45545	1.10738e-12	Nhlh2	1653	gene_body	TRUE
chr3	103019800	103021399	122	43	3.41989e-25	2.9857	4.01346e-24	Csde1	173	TSS	TRUE
chr3	103164400	103166599	76	35	6.60028e-11	2.28508	2.84119e-10	Bcas2	-6155	gene_body	TRUE
chr3	103169400	103173199	117	59	3.98544e-13	2.08684	2.09071e-12	Bcas2	-355	TSS	TRUE
chr3	103277000	103280999	138	54	4.48673e-24	2.68931	4.93961e-23	Trim33	-293	TSS	TRUE
chr3	103789800	103792599	134	34	2.59869e-41	4.14745	6.72755e-40	Hipk1	362	TSS	TRUE
chr3	103808200	103809999	119	34	2.49045e-32	3.68318	4.28554e-31	Dclre1b	343	TSS	TRUE
chr3	103913400	103915599	151	47	2.66909e-36	3.38091	5.5916e-35	Rsbn1	379	TSS	TRUE
chr3	104218600	104222599	243	58	7.88159e-78	4.40893	6.44038e-76	Magi3	-226	TSS	TRUE
chr3	104511400	104513799	170	54	1.67854e-39	3.31291	4.04101e-38	4930509H03Rik	-1287	intergenic	TRUE
chr3	104599600	104601199	63	28	5.84774e-10	2.36776	2.29272e-09	Gm26091	838	gene_body	TRUE
chr3	104636600	104639999	169	48	3.22788e-45	3.70511	9.70469e-44	Slc16a1	-368	TSS	TRUE
chr3	104816200	104819599	144	72	5.66736e-16	2.10468	3.70082e-15	Mov10	662	TSS	TRUE
chr3	104862800	104867599	185	75	1.02632e-29	2.59577	1.55057e-28	Capza1	-695	TSS	TRUE
chr3	104967600	104968399	47	14	1.64237e-13	3.53285	8.88807e-13	Wnt2b	-6079	intergenic	TRUE
chr3	105051800	105056799	291	99	7.20333e-60	3.09323	3.56522e-58	Cttnbp2nl	-1154	TSS	TRUE
chr3	105686200	105688399	123	41	2.00045e-27	3.15701	2.67326e-26	Ddx20	273	TSS	TRUE
chr3	105703000	105708199	183	89	6.26747e-21	2.1638	5.70135e-20	Fam212b	1000	TSS	TRUE
chr3	106481400	106483799	80	42	7.54174e-09	2.00445	2.61869e-08	Dennd2d	168	TSS	TRUE
chr3	106546200	106548399	100	41	9.24946e-17	2.56668	6.3997e-16	Dram2	-498	TSS	TRUE
chr3	107278400	107280399	70	36	2.58934e-08	2.04621	8.4202e-08	Lamtor5	541	TSS	TRUE
chr3	107330400	107335599	677	121	2.06522e-280	5.88787	1.90456e-277	Rbm15	672	TSS	TRUE
chr3	107516000	107519399	141	73	1.4934e-14	2.0326	8.7898e-14	Slc6a17	317	TSS	TRUE
chr3	107629600	107631999	133	43	1.06313e-30	3.2549	1.6886e-29	Gm10961	-522	TSS	TRUE
chr3	108143800	108146399	110	41	3.78141e-21	2.82334	3.47871e-20	Gnai3	1045	TSS	TRUE
chr3	108256400	108258999	234	53	3.18527e-79	4.64617	2.74163e-77	1700010K24Rik	-715	TSS	TRUE
chr3	108553000	108555399	98	43	1.07223e-14	2.39835	6.37439e-14	Scarna2	550	TSS	TRUE
chr3	108591000	108592399	141	30	7.76436e-52	4.94599	2.94342e-50	Wdr47	420	TSS	TRUE
chr3	108651800	108655799	143	74	9.57005e-15	2.03357	5.70742e-14	Clcc1	-113	TSS	TRUE
chr3	108838400	108842199	155	77	2.85718e-17	2.11834	2.05002e-16	Stxbp3	210	TSS	TRUE
chr3	108910200	108915599	209	103	6.03001e-23	2.13533	6.18299e-22	Prpf38b	-1173	TSS	TRUE
chr3	110141000	110145399	136	57	3.24406e-21	2.51084	3.00148e-20	Ntng1	810	TSS	TRUE
chr3	110249200	110251999	144	68	6.08668e-18	2.22848	4.58255e-17	Prmt6	397	TSS	TRUE
chr3	113629600	113631399	74	31	1.6336e-12	2.51203	8.15005e-12	Gm17954	1683	intergenic	TRUE
chr3	116006000	116010399	163	78	1.661e-19	2.19912	1.38202e-18	Extl2	737	TSS	TRUE
chr3	116251000	116253399	115	51	1.44741e-16	2.37292	9.84061e-16	Gpr88	1302	gene_body	TRUE
chr3	116422800	116426599	170	76	4.0477e-23	2.35391	4.19368e-22	Cdc14a	-668	TSS	TRUE
chr3	116504200	116509799	192	98	1.07892e-19	2.06172	9.10865e-19	Rtca	1207	TSS	TRUE
chr3	116594400	116596599	80	33	1.07226e-13	2.55112	5.89743e-13	Sass6	487	TSS	TRUE
chr3	116806800	116808799	93	42	2.33169e-13	2.33018	1.24677e-12	Agl	365	TSS	TRUE
chr3	116860600	116861999	62	22	9.34497e-14	2.96568	5.17025e-13	Frrs1	1835	gene_body	TRUE
chr3	121424200	121431199	280	111	1.70078e-45	2.65455	5.1789e-44	Gm42928	-126	TSS	TRUE
chr3	121704600	121707599	82	42	1.72797e-09	2.05456	6.42504e-09	Gm43608	4145	gene_body	TRUE
chr3	121718000	121720399	86	39	2.0472e-12	2.32054	1.01185e-11	Gm43823	4201	intergenic	TRUE
chr3	121721400	121726599	229	94	1.78735e-35	2.56367	3.59764e-34	F3	462	TSS	TRUE
chr3	121814200	121816399	85	42	1.73722e-10	2.12973	7.1776e-10	Abcd3	1	TSS	TRUE
chr3	122182400	122186199	121	61	1.63111e-13	2.08742	8.82821e-13	Gm9361	703	TSS	TRUE
chr3	122244000	122248199	145	64	1.64282e-20	2.3842	1.45589e-19	Gclm	542	TSS	TRUE
chr3	122617800	122620599	115	38	4.28028e-26	3.18471	5.29113e-25	Fnbp1l	514	TSS	TRUE
chr3	122728800	122730999	103	39	1.76429e-19	2.77925	1.46431e-18	Pde5a	952	TSS	TRUE
chr3	122923400	122927799	119	55	8.03362e-16	2.27688	5.17902e-15	1810037I17Rik	1396	TSS	TRUE
chr3	122983600	122985199	169	38	2.27245e-58	4.68013	1.06966e-56	Usp53	109	TSS	TRUE
chr3	123385800	123387199	60	10	7.72889e-29	6.31403	1.11263e-27	Mettl14	-392	TSS	TRUE
chr3	126595200	126598399	166	79	4.7787e-20	2.21124	4.13045e-19	Camk2d	-207	TSS	TRUE
chr3	126667200	126669399	79	40	2.0003e-09	2.07837	7.38566e-09	Gm15551	743	TSS	TRUE
chr3	127552600	127554599	145	38	6.07344e-43	4.0155	1.68579e-41	Zgrf1	110	TSS	TRUE
chr3	127631400	127634999	152	78	7.7784e-16	2.05071	5.02165e-15	Neurog2	64	TSS	TRUE
chr3	127779000	127781399	87	35	2.61379e-15	2.61581	1.6289e-14	Alpk1	326	TSS	TRUE
chr3	129724400	129726799	110	31	1.49352e-30	3.7341	2.35359e-29	Gm42697	-3245	gene_body	TRUE
chr3	129830600	129831599	66	22	9.44126e-16	3.15701	6.06313e-15	Gar1	295	TSS	TRUE
chr3	129968600	129970799	75	28	4.48707e-15	2.81876	2.74392e-14	Ccdc109b	505	TSS	TRUE
chr3	130729800	130731599	134	22	6.30072e-62	6.40969	3.34961e-60	Gm42997	98	TSS	TRUE
chr3	131301000	131304799	224	85	1.40157e-39	2.77322	3.38958e-38	4930534D22Rik	256	TSS	TRUE
chr3	132683600	132684599	60	25	1.28029e-10	2.52561	5.35558e-10	Tbck	-44	TSS	TRUE
chr3	133091000	133093399	119	33	1.77249e-33	3.79479	3.22444e-32	Ints12	359	TSS	TRUE
chr3	135211000	135214999	133	65	1.26002e-15	2.15324	8.01204e-15	Cenpe	462	TSS	TRUE
chr3	135422600	135424199	60	28	8.01752e-09	2.25501	2.77557e-08	Cisd2	524	TSS	TRUE
chr3	135437000	135440599	210	67	6.05844e-48	3.29837	2.01597e-46	4930539J05Rik	-135	TSS	TRUE
chr3	135689600	135692199	83	40	8.67186e-11	2.1836	3.6793e-10	Nfkb1	645	TSS	TRUE
chr3	135824400	135827399	122	63	6.20905e-13	2.03786	3.20767e-12	Slc39a8	620	TSS	TRUE
chr3	136668200	136674199	345	113	2.00602e-74	3.21289	1.50829e-72	Ppp3ca	1075	TSS	TRUE
chr3	137858200	137865799	287	142	1.95265e-30	2.12691	3.05952e-29	Gm43403	2373	TSS	TRUE
chr3	137917200	137919199	101	22	5.05054e-37	4.83119	1.0946e-35	Gm43689	244	TSS	TRUE
chr3	138143200	138144199	111	19	4.76257e-50	6.14787	1.71894e-48	Trmt10a	251	TSS	TRUE
chr3	138441000	138444199	218	72	2.16247e-47	3.18624	7.04525e-46	Adh5	-493	TSS	TRUE
chr3	138484800	138490199	191	100	1.65541e-18	2.00996	1.29107e-17	Metap1	2014	TSS	TRUE
chr3	138740800	138747599	230	115	2.91869e-24	2.10468	3.25412e-23	Tspan5	2004	TSS	TRUE
chr3	139074000	139076799	122	41	6.38981e-27	3.13135	8.29243e-26	Rap1gds1	-199	TSS	TRUE
chr3	142394000	142396199	118	45	9.30299e-22	2.75946	8.93293e-21	Pdlim5	592	TSS	TRUE
chr3	142881000	142882799	86	18	4.19248e-33	5.02783	7.49258e-32	Pkn2	103	TSS	TRUE
chr3	144201600	144202799	71	14	2.80812e-29	5.33685	4.14007e-28	Gm43445	-2938	gene_body	TRUE
chr3	144203600	144206199	103	30	1.14776e-27	3.61303	1.55424e-26	Lmo4	319	TSS	TRUE
chr3	144568800	144572799	191	71	3.32987e-35	2.83094	6.63156e-34	Selenof	373	TSS	TRUE
chr3	145572800	145579399	244	118	1.62469e-27	2.17602	2.18177e-26	Znhit6	-132	TSS	TRUE
chr3	145647400	145658999	456	205	1.39955e-57	2.34081	6.43366e-56	Gm17501	1105	TSS	TRUE
chr3	145758000	145760199	112	40	7.0493e-23	2.94655	7.19466e-22	Ddah1	424	TSS	TRUE
chr3	145923800	145930799	374	166	7.46685e-49	2.37093	2.57566e-47	Bcl10	3037	TSS	TRUE
chr3	145935800	145941599	194	99	6.92395e-20	2.06216	5.9179e-19	2410004B18Rik	685	TSS	TRUE
chr3	145986200	145989599	168	68	2.90369e-27	2.59989	3.85125e-26	Syde2	29	TSS	TRUE
chr3	146116800	146118799	97	46	1.17799e-12	2.21906	5.94193e-12	Gm25627	-1546	intergenic	TRUE
chr3	146499000	146502399	111	55	5.15827e-13	2.12381	2.68168e-12	Gng5	892	TSS	TRUE
chr3	146520000	146522199	97	41	1.59291e-15	2.48968	1.00679e-14	Rpf1	328	TSS	TRUE
chr3	146811400	146813599	117	43	7.94587e-23	2.86334	8.08598e-22	Prkacb	459	TSS	TRUE
chr3	148986000	148992199	240	85	5.70242e-47	2.97131	1.83012e-45	Gm43573	-52	TSS	TRUE
chr3	152208800	152211199	150	37	2.29856e-47	4.26623	7.47784e-46	Dnajb4	278	TSS	TRUE
chr3	152346200	152349199	92	47	1.82461e-10	2.05989	7.5208e-10	Usp33	1221	TSS	TRUE
chr3	152666400	152667999	89	37	8.18157e-15	2.5313	4.91079e-14	AI115009	286	TSS	TRUE
chr3	153908600	153915399	236	120	6.30061e-24	2.0696	6.89292e-23	Gm24494	-310	TSS	TRUE
chr3	153941600	153945199	163	61	4.53571e-30	2.81198	6.99044e-29	Acadm	1231	TSS	TRUE
chr3	154596600	154597999	64	27	5.63314e-11	2.49443	2.43857e-10	Tyw3	-205	TSS	TRUE
chr3	155092800	155093999	58	23	3.93805e-11	2.65372	1.73005e-10	Fpgt	2	TSS	TRUE
chr3	157533000	157535199	121	40	2.54632e-27	3.18332	3.3852e-26	Gm43159	-10	TSS	TRUE
chr3	157924400	157925399	76	26	3.30595e-17	3.07606	2.36301e-16	Cth	176	TSS	TRUE
chr3	157946200	157948799	147	53	6.48389e-29	2.91875	9.37281e-28	Ankrd13c	85	TSS	TRUE
chr3	159838800	159841199	94	34	3.28932e-19	2.9094	2.68445e-18	Wls	262	TSS	TRUE
chr4	3176800	3179399	73	31	4.19333e-12	2.47809	2.01669e-11	Vmn1r2	6016	intergenic	TRUE
chr4	3574600	3575599	63	16	1.13328e-20	4.14358	1.01498e-19	Tgs1	224	TSS	TRUE
chr4	3936600	3939599	376	36	2.08316e-246	10.9911	1.34477e-243	Plag1	281	TSS	TRUE
chr4	6190800	6192399	61	15	9.25881e-21	4.27951	8.34771e-20	Ubxn2b	501	TSS	TRUE
chr4	9668400	9669999	147	36	7.98379e-47	4.29704	2.54423e-45	Gm25677	-79	TSS	TRUE
chr4	11007000	11008599	58	19	2.04306e-14	3.2124	1.18956e-13	Plekhf2	-124	TSS	TRUE
chr4	11153600	11157599	124	51	3.66631e-20	2.55862	3.18725e-19	Trp53inp1	-831	TSS	TRUE
chr4	11189400	11192599	134	47	1.22441e-27	3.00028	1.65308e-26	Ccne2	-354	TSS	TRUE
chr4	11251800	11254599	94	45	4.15311e-12	2.19822	1.99958e-11	Ints8	1057	TSS	TRUE
chr4	11484800	11490599	159	74	3.69079e-20	2.2611	3.2073e-19	1110037F02Rik	1741	TSS	TRUE
chr4	11558600	11559599	57	15	3.06255e-18	3.99888	2.35338e-17	Fsbp	127	TSS	TRUE
chr4	11964400	11967399	172	42	1.59109e-54	4.30957	6.63268e-53	Pdp1	551	TSS	TRUE
chr4	12006000	12010199	102	49	7.00882e-13	2.19058	3.60333e-12	Gm11840	942	TSS	TRUE
chr4	12906600	12907399	77	9	9.64353e-47	9.00333	3.0645e-45	Triqk	141	TSS	TRUE
chr4	14825800	14826799	80	18	6.19487e-29	4.67706	8.96936e-28	Otud6b	286	TSS	TRUE
chr4	14863600	14864999	57	26	8.20988e-09	2.30705	2.83847e-08	Tmem55a	223	TSS	TRUE
chr4	15265400	15266799	72	20	3.81843e-21	3.78842	3.51205e-20	Tmem64	268	TSS	TRUE
chr4	15957800	15958799	71	18	4.83457e-23	4.15089	4.98209e-22	Nbn	374	TSS	TRUE
chr4	16013600	16014799	65	12	1.43309e-28	5.70016	2.03355e-27	Osgin2	-312	TSS	TRUE
chr4	16162200	16164399	140	22	7.39927e-67	6.69669	4.58653e-65	Ripk2	346	TSS	TRUE
chr4	19569400	19570399	55	9	5.0251e-27	6.43095	6.56284e-26	Cpne3	207	TSS	TRUE
chr4	19708400	19710199	64	14	2.89428e-24	4.81069	3.2281e-23	Wwp1	-307	TSS	TRUE
chr4	21726800	21728399	65	20	3.62976e-17	3.4201	2.58404e-16	Ccnc	-126	TSS	TRUE
chr4	21846600	21848799	82	27	2.41424e-19	3.19599	1.98588e-18	Pnisr	116	TSS	TRUE
chr4	21929800	21933599	94	48	1.16466e-10	2.06083	4.89024e-10	Faxc	342	TSS	TRUE
chr4	22357600	22358999	65	21	3.58278e-16	3.25724	2.3751e-15	Fbxl4	756	gene_body	TRUE
chr4	24496200	24496999	49	7	6.85043e-27	7.36636	8.86475e-26	Mms22l	148	TSS	TRUE
chr4	25281200	25281999	55	10	7.23448e-25	5.78786	8.33321e-24	Ufl1	220	TSS	TRUE
chr4	26346400	26346999	52	16	3.56888e-14	3.4201	2.03342e-13	Manea	190	TSS	TRUE
chr4	31962800	31964599	86	30	1.11255e-18	3.0167	8.77764e-18	Map3k7	-397	TSS	TRUE
chr4	32237000	32240399	102	45	4.5703e-15	2.3853	2.79217e-14	Bach2	-104	TSS	TRUE
chr4	32615000	32615999	92	19	1.12612e-35	5.09553	2.29479e-34	Casp8ap2	26	TSS	TRUE
chr4	32800000	32801799	67	27	3.08189e-12	2.61136	1.49819e-11	Lyrm2	620	TSS	TRUE
chr4	33309400	33310799	71	13	3.44351e-31	5.74738	5.60538e-30	Gm11934	36	TSS	TRUE
chr4	34550400	34552599	62	25	1.81594e-11	2.6098	8.24752e-11	Akirin2	562	TSS	TRUE
chr4	35155600	35158199	77	32	4.19158e-13	2.53219	2.19426e-12	Mob3b	583	TSS	TRUE
chr4	35225200	35226799	95	16	8.77061e-44	6.24825	2.52598e-42	Gm12367	67	TSS	TRUE
chr4	40138800	40144399	240	87	2.34404e-45	2.903	7.07566e-44	Aco1	-1481	TSS	TRUE
chr4	40267600	40270399	143	60	3.74263e-22	2.50807	3.67337e-21	Toporsos	-579	TSS	TRUE
chr4	40721400	40723999	143	35	1.2015e-45	4.29955	3.67965e-44	Dnaja1	-222	TSS	TRUE
chr4	40756600	40758199	85	15	5.51199e-38	5.96325	1.24445e-36	Smu1	522	TSS	TRUE
chr4	40771600	40777399	169	65	8.6457e-30	2.73608	1.31277e-28	Gm12396	1063	TSS	TRUE
chr4	40846600	40855199	256	114	5.96697e-34	2.36314	1.11627e-32	Gm25931	-498	TSS	TRUE
chr4	40947600	40948999	104	26	3.95135e-33	4.20935	7.07564e-32	Bag1	-6	TSS	TRUE
chr4	40970600	40972999	93	33	1.4974e-19	2.96568	1.2498e-18	Nfx1	893	TSS	TRUE
chr4	41133800	41137399	106	34	3.39636e-25	3.28082	3.98998e-24	Ube2r2	-143	TSS	TRUE
chr4	41273800	41277399	131	39	1.24106e-33	3.53477	2.28528e-32	Ubap2	-456	TSS	TRUE
chr4	41348200	41349799	81	15	6.86952e-35	5.68262	1.34789e-33	Ubap1	3	TSS	TRUE
chr4	41463000	41466199	329	35	2.4102e-202	9.89197	1.15864e-199	Kif24	239	TSS	TRUE
chr4	41501600	41505599	128	57	4.59113e-18	2.36314	3.47802e-17	AI464131	-524	TSS	TRUE
chr4	41567200	41573199	195	85	1.84877e-27	2.41419	2.47423e-26	Dnaic1	424	TSS	TRUE
chr4	41722000	41723999	79	32	6.04212e-14	2.59796	3.38476e-13	Dctn3	169	TSS	TRUE
chr4	41735600	41742799	204	105	2.09206e-20	2.04454	1.84497e-19	Arid3c	-8058	gene_body	TRUE
chr4	42945800	42954199	495	142	6.09694e-126	3.66836	1.23546e-123	Dnajb5	185	TSS	TRUE
chr4	42999600	43000999	229	25	1.86417e-139	9.63941	4.73248e-137	Vcp	206	TSS	TRUE
chr4	43008600	43010799	77	39	3.13941e-09	2.07769	1.13505e-08	Fancg	787	TSS	TRUE
chr4	43029800	43031999	79	40	2.0003e-09	2.07837	7.38566e-09	Gm26643	-99	TSS	TRUE
chr4	43035600	43041599	231	80	8.19409e-47	3.03862	2.60941e-45	Stoml2	-6890	gene_body	TRUE
chr4	43043800	43046399	131	39	1.24106e-33	3.53477	2.28528e-32	Gm26881	-866	TSS	TRUE
chr4	43381400	43383599	79	20	2.07495e-25	4.15673	2.46323e-24	Rusc2	520	TSS	TRUE
chr4	43420600	43422399	59	14	7.02723e-21	4.43485	6.37516e-20	Fam166b	7633	gene_body	TRUE
chr4	43425000	43426799	79	25	1.0979e-19	3.32539	9.25938e-19	Fam166b	3233	gene_body	TRUE
chr4	43442000	43443999	93	29	3.36012e-23	3.37474	3.5034e-22	Tesk1	1060	gene_body	TRUE
chr4	43492200	43495599	154	53	2.78179e-32	3.05774	4.77415e-31	Ccdc107	537	TSS	TRUE
chr4	43521000	43524599	124	53	6.88108e-19	2.46207	5.51023e-18	Tpm2	794	TSS	TRUE
chr4	43578000	43588399	368	187	3.82677e-36	2.07091	7.97989e-35	Msmp	1293	TSS	TRUE
chr4	43630200	43634799	164	83	1.91508e-17	2.07932	1.39241e-16	Npr2	564	TSS	TRUE
chr4	43650600	43653399	97	51	2.73604e-10	2.0015	1.10869e-09	Spag8	1551	gene_body	TRUE
chr4	43654400	43663199	415	125	1.17916e-99	3.49376	1.48424e-97	Hint2	-2334	TSS	TRUE
chr4	43668600	43670199	75	33	1.1312e-11	2.39168	5.23413e-11	Fam221b	-259	TSS	TRUE
chr4	43857800	43862199	118	60	5.40464e-13	2.0696	2.80251e-12	Olfr155	8434	intergenic	TRUE
chr4	43873200	43876199	90	43	1.01124e-11	2.20257	4.70532e-11	Reck	-830	TSS	TRUE
chr4	44011400	44013799	110	34	2.53667e-27	3.40462	3.37386e-26	Clta	8147	gene_body	TRUE
chr4	44071800	44073799	115	28	2.11847e-37	4.3221	4.66746e-36	Gm22706	8599	gene_body	TRUE
chr4	44233000	44234799	65	16	6.05245e-22	4.27512	5.86717e-21	Rnf38	-111	TSS	TRUE
chr4	44755600	44757199	81	34	1.85365e-13	2.50704	9.99435e-13	Zcchc7	-168	TSS	TRUE
chr4	45011400	45013599	296	35	3.60087e-170	8.89977	1.2914e-167	Zbtb5	-88	TSS	TRUE
chr4	45107600	45109599	80	31	4.37218e-15	2.71571	2.6791e-14	Tomm5	-486	TSS	TRUE
chr4	45341800	45343199	65	33	4.72496e-08	2.07279	1.48602e-07	Exosc3	231	TSS	TRUE
chr4	45407600	45409199	69	17	3.96235e-23	4.27125	4.11138e-22	Slc25a51	365	TSS	TRUE
chr4	45526000	45532799	205	92	3.14381e-27	2.34488	4.16117e-26	Shb	929	TSS	TRUE
chr4	45972000	45973999	77	18	6.40031e-27	4.50167	8.3013e-26	Tdrd7	7665	gene_body	TRUE
chr4	46137800	46139199	78	13	1.01688e-36	6.31403	2.18138e-35	Tstd2	-25	TSS	TRUE
chr4	46389000	46390599	84	27	2.20375e-20	3.27394	1.94005e-19	Trmo	-382	TSS	TRUE
chr4	46450600	46453399	75	11	5.13114e-39	7.17503	1.20984e-37	Anp32b	1097	TSS	TRUE
chr4	46487600	46490199	93	24	6.83918e-29	4.07781	9.86904e-28	Nans	-348	TSS	TRUE
chr4	46596000	46597999	65	29	3.79458e-10	2.35869	1.51743e-09	Coro2a	5201	gene_body	TRUE
chr4	47351600	47353799	97	16	2.12493e-45	6.3798	6.42713e-44	Tgfbr1	-522	TSS	TRUE
chr4	48042800	48049799	240	83	1.21409e-48	3.0429	4.14679e-47	Nr4a3	1146	TSS	TRUE
chr4	48124200	48125599	78	17	3.84931e-29	4.82837	5.62739e-28	Stx17	-26	TSS	TRUE
chr4	48278800	48280599	87	17	1.35673e-35	5.38549	2.74677e-34	Invs	-102	TSS	TRUE
chr4	48473000	48473799	78	5	3.01882e-66	16.4165	1.82616e-64	Tex10	58	TSS	TRUE
chr4	48584600	48586799	69	25	1.21509e-14	2.90445	7.19534e-14	Tmeff1	525	TSS	TRUE
chr4	49520600	49524199	83	42	8.12752e-10	2.07962	3.13274e-09	Zfp189	1223	TSS	TRUE
chr4	49631600	49632599	75	23	1.52848e-19	3.43154	1.27398e-18	Rnf20	39	TSS	TRUE
chr4	52439000	52440399	54	24	8.09997e-09	2.36776	2.8024e-08	Smc2	456	TSS	TRUE
chr4	53011200	53013799	99	32	1.89689e-23	3.25567	2.00577e-22	Nipsnap3b	619	TSS	TRUE
chr4	53438200	53441399	83	34	2.73553e-14	2.56894	1.57199e-13	Slc44a1	-613	TSS	TRUE
chr4	53713200	53716399	96	49	7.43568e-11	2.06172	3.18306e-10	Fktn	801	TSS	TRUE
chr4	54944000	54950999	237	114	4.29991e-27	2.18775	5.65332e-26	Zfp462	-476	TSS	TRUE
chr4	55347400	55352599	340	115	4.07076e-70	3.11126	2.72518e-68	Rad23b	-43	TSS	TRUE
chr4	55529000	55534999	383	119	1.72643e-88	3.38694	1.80171e-86	Klf4	465	TSS	TRUE
chr4	58184000	58185599	70	35	8.84894e-09	2.10468	3.04718e-08	Gm26889	6552	gene_body	TRUE
chr4	70531600	70543199	816	374	3.25559e-97	2.29601	3.97604e-95	Megf9	-2472	TSS	TRUE
chr4	74251000	74253199	194	81	1.61482e-29	2.52041	2.41704e-28	A230083N12Rik	-386	TSS	TRUE
chr4	75277600	75278399	67	16	3.04544e-23	4.40666	3.18375e-22	Tmem261	304	TSS	TRUE
chr4	84882800	84885999	191	84	1.66705e-26	2.39282	2.1101e-25	Cntln	90	TSS	TRUE
chr4	86746000	86752199	367	178	5.17044e-40	2.16971	1.27464e-38	Dennd4c	544	TSS	TRUE
chr4	88030000	88039999	380	188	1.3915e-39	2.12707	3.36974e-38	Gm12631	1498	TSS	TRUE
chr4	88719800	88722799	193	79	2.11514e-30	2.5709	3.2981e-29	Gm26566	-505	TSS	TRUE
chr4	94600600	94605399	246	113	8.47121e-31	2.29093	1.35264e-29	Plaa	243	TSS	TRUE
chr4	99828400	99830999	113	49	5.66116e-17	2.42682	3.97477e-16	Efcab7	-1694	gene_body	TRUE
chr4	100095800	100098999	127	49	7.84258e-23	2.72749	7.98356e-22	Ror1	1608	gene_body	TRUE
chr4	101642600	101655999	917	356	1.2154e-148	2.71066	3.43258e-146	Leprot	1581	TSS	TRUE
chr4	103111800	103123799	617	274	5.81739e-79	2.36968	4.95058e-77	Wdr78	-3245	TSS	TRUE
chr4	103213200	103217199	174	85	8.05734e-20	2.1542	6.85743e-19	Slc35d1	-36	TSS	TRUE
chr4	107367600	107368799	121	45	4.0527e-23	2.82962	4.19742e-22	Ndc1	415	TSS	TRUE
chr4	108116800	108119399	124	46	1.00159e-23	2.83674	1.08135e-22	Scp2	431	TSS	TRUE
chr4	108211200	108213999	93	47	8.59083e-11	2.08228	3.648e-10	Zyg11a	5321	gene_body	TRUE
chr4	108577200	108580599	186	75	3.89895e-30	2.6098	6.03376e-29	Prpf38a	435	TSS	TRUE
chr4	108776800	108784799	278	141	5.82006e-28	2.07482	7.99382e-27	Zfyve9	-2	TSS	TRUE
chr4	108845200	108850199	255	116	1.84456e-32	2.31333	3.19479e-31	Kti12	-85	TSS	TRUE
chr4	109656400	109658199	147	48	3.06154e-33	3.22278	5.51724e-32	9630013D21Rik	526	TSS	TRUE
chr4	109661200	109667199	311	117	8.78654e-55	2.79724	3.72813e-53	Cdkn2c	2988	TSS	TRUE
chr4	109676000	109679399	205	69	1.51289e-43	3.12651	4.31051e-42	Faf1	1111	TSS	TRUE
chr4	111719600	111722799	131	62	1.93978e-16	2.22349	1.30984e-15	Spata6	1215	TSS	TRUE
chr4	114905000	114910799	251	105	2.13832e-37	2.51559	4.70888e-36	Foxd2	972	TSS	TRUE
chr4	114986000	114988599	112	47	8.1799e-18	2.5077	6.10661e-17	Cmpk1	-59	TSS	TRUE
chr4	114998600	115000799	143	48	3.29725e-31	3.13509	5.38086e-30	Stil	-459	TSS	TRUE
chr4	115056000	115061399	202	97	1.70813e-23	2.19147	1.81148e-22	Tal1	2273	TSS	TRUE
chr4	115737400	115741399	213	100	8.08047e-26	2.24148	9.81824e-25	Efcab14	1326	TSS	TRUE
chr4	116506000	116508199	110	56	3.23178e-12	2.06709	1.56583e-11	Ipp	-452	TSS	TRUE
chr4	116550800	116558999	351	183	1.48158e-32	2.01842	2.57498e-31	Tmem69	1035	TSS	TRUE
chr4	116626000	116628199	184	42	2.28456e-62	4.61024	1.22606e-60	Nasp	396	TSS	TRUE
chr4	116668400	116671399	85	40	1.68387e-11	2.23622	7.67585e-11	Gm25137	-4253	intergenic	TRUE
chr4	116717400	116722799	285	128	6.30241e-37	2.3431	1.36004e-35	Ccdc163	-869	TSS	TRUE
chr4	118174600	118182599	428	157	1.58794e-77	2.86879	1.28595e-75	Kdm4a	1442	TSS	TRUE
chr4	119290000	119299799	586	237	2.13698e-89	2.60198	2.2775e-87	Ybx1	-296	TSS	TRUE
chr4	120568000	120571799	285	85	3.99787e-70	3.52843	2.68234e-68	Ctps	375	TSS	TRUE
chr4	120822400	120827199	232	99	1.58608e-33	2.46608	2.90169e-32	Nfyc	6771	gene_body	TRUE
chr4	120924200	120926999	149	47	3.08782e-35	3.33613	6.15765e-34	Exo5	-595	TSS	TRUE
chr4	120946400	120952599	249	128	1.64263e-24	2.04713	1.8529e-23	Zfp69	2198	TSS	TRUE
chr4	121097400	121098599	82	30	9.20404e-17	2.87639	6.37316e-16	Zmpste24	240	TSS	TRUE
chr4	121211400	121215399	162	80	3.49434e-18	2.13098	2.67223e-17	Rlf	1683	TSS	TRUE
chr4	122882000	122887399	351	141	3.6272e-55	2.61965	1.56548e-53	Cap1	1355	TSS	TRUE
chr4	123101800	123103599	65	33	4.72496e-08	2.07279	1.48602e-07	Bmp8b	-2465	intergenic	TRUE
chr4	123902400	123906199	162	75	1.03683e-20	2.27305	9.309e-20	Mycbp	-532	TSS	TRUE
chr4	123915400	123919199	329	82	1.18026e-99	4.22218	1.48149e-97	Gm12905	-31	TSS	TRUE
chr4	124688800	124693999	227	95	5.15553e-34	2.51453	9.69893e-33	Utp11l	2199	TSS	TRUE
chr4	124698800	124702599	165	73	6.08908e-23	2.37857	6.24072e-22	Fhl3	-20	TSS	TRUE
chr4	124703400	124711599	429	219	2.56377e-41	2.06143	6.64288e-40	Fhl3	6779	gene_body	TRUE
chr4	124749400	124757599	517	187	3.39519e-95	2.9094	4.01627e-93	Gm12915	-2146	TSS	TRUE
chr4	124801800	124803799	142	43	1.70001e-35	3.47516	3.42641e-34	Mtf1	695	TSS	TRUE
chr4	124849400	124854399	254	103	6.30687e-40	2.59508	1.54804e-38	1110065P20Rik	-704	TSS	TRUE
chr4	125029800	125031599	128	43	3.80175e-28	3.13254	5.26006e-27	Gnl2	707	TSS	TRUE
chr4	125490800	125493999	134	66	1.76237e-15	2.13656	1.11148e-14	Grik3	1699	gene_body	TRUE
chr4	126201400	126207799	301	153	6.05247e-30	2.07028	9.26487e-29	Thrap3	-1840	TSS	TRUE
chr4	126966600	126969999	111	54	1.6831e-13	2.16314	9.10302e-13	Zmym4	-165	TSS	TRUE
chr4	127987600	127990399	103	43	1.07243e-16	2.52072	7.37499e-16	Csmd2	955	TSS	TRUE
chr4	128988000	128997799	598	209	1.24093e-115	3.01099	2.13213e-113	Ak2	-324	TSS	TRUE
chr4	129188200	129191199	215	91	1.07452e-31	2.48629	1.78579e-30	S100pbp	26	TSS	TRUE
chr4	129326600	129339799	571	281	5.01157e-59	2.13838	2.41689e-57	Rbbp4	2169	TSS	TRUE
chr4	129541200	129543199	169	35	3.26502e-63	5.08129	1.79053e-61	Hdac1	512	TSS	TRUE
chr4	129550400	129551999	62	31	5.40195e-08	2.10468	1.68994e-07	Hdac1	-8487	gene_body	TRUE
chr4	129598800	129601799	160	68	5.53751e-24	2.47609	6.07204e-23	Eif3i	347	TSS	TRUE
chr4	129636000	129641799	269	120	1.93366e-35	2.35899	3.88521e-34	Txlna	2164	TSS	TRUE
chr4	129668400	129676799	317	149	2.97664e-37	2.23887	6.50112e-36	Kpna6	166	TSS	TRUE
chr4	129737400	129743999	320	134	5.93865e-47	2.51304	1.90458e-45	Khdrbs1	1596	TSS	TRUE
chr4	130106400	130113799	374	161	8.84074e-52	2.44456	3.34866e-50	Pef1	7541	gene_body	TRUE
chr4	130272600	130276199	138	72	4.8003e-14	2.01698	2.71111e-13	Serinc2	4804	gene_body	TRUE
chr4	130358000	130360999	277	91	5.34719e-60	3.20327	2.66405e-58	Zcchc17	442	TSS	TRUE
chr4	130661200	130664799	154	78	1.76977e-16	2.07769	1.19755e-15	Pum1	-321	TSS	TRUE
chr4	131843000	131843999	58	19	2.04306e-14	3.2124	1.18956e-13	Mecr	29	TSS	TRUE
chr4	131873000	131875799	77	28	5.22109e-16	2.89393	3.42151e-15	Srsf4	782	TSS	TRUE
chr4	131918000	131921399	122	46	8.19388e-23	2.79098	8.33368e-22	Gm12978	328	TSS	TRUE
chr4	132074200	132075599	59	27	5.28616e-09	2.29955	1.86669e-08	Gm10300	202	TSS	TRUE
chr4	132210400	132213799	112	28	1.72354e-35	4.20935	3.47074e-34	Ythdf2	202	TSS	TRUE
chr4	132272600	132276199	94	39	1.40396e-15	2.5364	8.9154e-15	Taf12	24	TSS	TRUE
chr4	132328600	132330599	94	38	3.03069e-16	2.60315	2.01799e-15	Trnau1ap	-62	TSS	TRUE
chr4	132344800	132346999	79	33	2.79035e-13	2.51923	1.4856e-12	Rcc1	5735	gene_body	TRUE
chr4	132421000	132422799	82	23	1.68543e-23	3.75181	1.7895e-22	Phactr4	588	TSS	TRUE
chr4	132462400	132465599	81	39	1.35566e-10	2.18562	5.65307e-10	Med18	-79	TSS	TRUE
chr4	132507200	132511599	231	71	3.80104e-55	3.4238	1.63582e-53	Gm12981	248	TSS	TRUE
chr4	132533200	132533799	44	11	2.28777e-15	4.20935	1.43304e-14	Atpif1	158	TSS	TRUE
chr4	132638800	132640599	67	17	7.39574e-22	4.14745	7.14024e-21	Eya3	653	TSS	TRUE
chr4	132731000	132733799	84	30	1.03555e-17	2.94655	7.67938e-17	Xkr8	145	TSS	TRUE
chr4	132767400	132768799	65	14	5.81241e-25	4.88585	6.73292e-24	Rpa2	-235	TSS	TRUE
chr4	132883800	132885399	72	15	3.08458e-28	5.05122	4.29541e-27	Stx12	-91	TSS	TRUE
chr4	132921400	132923399	167	24	8.11347e-85	7.32252	7.90155e-83	Fam76a	157	TSS	TRUE
chr4	133010400	133014799	121	38	3.19206e-29	3.35086	4.69082e-28	Ahdc1	1093	TSS	TRUE
chr4	133129200	133131799	112	49	1.39414e-16	2.40534	9.49698e-16	Wasf2	-5	TSS	TRUE
chr4	133240600	133242199	62	10	1.77684e-30	6.52449	2.78887e-29	Map3k6	581	TSS	TRUE
chr4	133368800	133371999	87	35	2.61379e-15	2.61581	1.6289e-14	Slc9a1	693	TSS	TRUE
chr4	133479200	133480999	169	9	7.98186e-153	19.7606	2.327e-150	Fam46b	-32	TSS	TRUE
chr4	133545600	133546399	76	8	2.58812e-49	9.99721	9.045e-48	Nudc	-4	TSS	TRUE
chr4	133582800	133584999	77	17	1.8884e-28	4.76647	2.66458e-27	Gpn2	-462	TSS	TRUE
chr4	133756600	133758599	73	21	1.41978e-20	3.65813	1.26542e-19	Arid1a	-831	TSS	TRUE
chr4	133813200	133814599	79	4	8.08625e-75	20.7837	6.18277e-73	Gm12974	-2520	intergenic	TRUE
chr4	134122800	134131199	235	100	4.20923e-34	2.47299	7.96845e-33	Sh3bgrl3	1788	TSS	TRUE
chr4	134185800	134187399	74	20	2.46304e-22	3.89365	2.44804e-21	Cep85	511	TSS	TRUE
chr4	134243800	134251999	207	83	1.34621e-33	2.6245	2.46985e-32	Gm30191	964	TSS	TRUE
chr4	134286400	134287999	74	15	1.12224e-29	5.19153	1.69152e-28	Pdik1l	694	TSS	TRUE
chr4	134467000	134469199	86	20	6.16169e-30	4.52505	9.42248e-29	Stmn1	-220	TSS	TRUE
chr4	134534400	134536199	133	14	3.80339e-84	9.99721	3.63357e-82	Mtfr1l	86	TSS	TRUE
chr4	134543600	134547999	107	53	1.26064e-12	2.12453	6.34431e-12	Selenon	6365	gene_body	TRUE
chr4	134703000	134705199	82	16	9.77989e-34	5.39323	1.80787e-32	Man1c1	189	TSS	TRUE
chr4	134765400	134769199	115	41	1.72513e-23	2.95168	1.82864e-22	Ldlrap1	723	TSS	TRUE
chr4	134851400	134854399	307	33	8.94646e-188	9.78993	3.81389e-185	Tmem57	444	TSS	TRUE
chr4	134922400	134925799	112	40	7.0493e-23	2.94655	7.19466e-22	Rsrp1	507	TSS	TRUE
chr4	134930600	134931599	54	7	2.1091e-31	8.11803	3.46694e-30	Syf2	201	TSS	TRUE
chr4	135271200	135275399	181	33	9.53215e-76	5.77191	7.37567e-74	Clic4	-486	TSS	TRUE
chr4	135433400	135436799	84	43	1.10166e-09	2.05573	4.18685e-09	Rcan3	-1247	TSS	TRUE
chr4	135854800	135857799	98	20	2.99242e-38	5.15645	6.84147e-37	Srsf10	552	TSS	TRUE
chr4	135919800	135921999	68	18	3.5022e-21	3.9755	3.23337e-20	Fuca1	164	TSS	TRUE
chr4	135963400	135964999	84	25	2.06174e-22	3.53585	2.06051e-21	Gale	472	TSS	TRUE
chr4	135966400	135969199	84	27	2.20375e-20	3.27394	1.94005e-19	Gale	4072	gene_body	TRUE
chr4	136020400	136023199	84	21	3.18621e-27	4.20935	4.21606e-26	Tceb3	-37	TSS	TRUE
chr4	136070000	136073399	107	55	1.06287e-11	2.04727	4.92985e-11	Gm13009	3271	intergenic	TRUE
chr4	136133800	136136999	123	40	2.39519e-28	3.23594	3.35713e-27	Gm26001	-2096	intergenic	TRUE
chr4	136142200	136152799	364	187	7.07072e-35	2.0484	1.38497e-33	Id3	4002	TSS	TRUE
chr4	136205400	136206799	56	16	1.96002e-16	3.68318	1.32282e-15	Asap3	-265	TSS	TRUE
chr4	136284600	136286799	118	38	1.21336e-27	3.26778	1.6389e-26	Zfp46	-367	TSS	TRUE
chr4	136289400	136292199	98	51	1.32718e-10	2.02214	5.5443e-10	Zfp46	4732	gene_body	TRUE
chr4	136309400	136311999	239	42	2.50387e-102	5.9883	3.27009e-100	Hnrnpr	-268	TSS	TRUE
chr4	136455000	136459799	106	49	2.58493e-14	2.27649	1.48904e-13	6030445D17Rik	-4850	intergenic	TRUE
chr4	136469200	136471199	67	19	2.20813e-19	3.71087	1.82281e-18	Luzp1	438	TSS	TRUE
chr4	136832800	136837199	212	47	1.37749e-73	4.74671	1.01049e-71	Ephb2	987	TSS	TRUE
chr4	136962200	136965599	104	50	4.49277e-13	2.18886	2.34732e-12	Epha8	-7084	intergenic	TRUE
chr4	137163200	137166799	109	49	1.97593e-15	2.34091	1.24089e-14	Gm13003	65	TSS	TRUE
chr4	137356000	137358799	80	26	3.01828e-19	3.23796	2.47084e-18	Cdc42	319	TSS	TRUE
chr4	137387600	137389799	98	41	6.22943e-16	2.51534	4.0573e-15	2810405F17Rik	-318	TSS	TRUE
chr4	137447800	137448799	57	15	3.06255e-18	3.99888	2.35338e-17	1700013G24Rik	-4984	intergenic	TRUE
chr4	137459800	137471599	420	220	4.36247e-38	2.00901	9.89615e-37	Hspg2	-3069	TSS	TRUE
chr4	137528800	137531799	98	48	5.39242e-12	2.14852	2.56714e-11	Mir7018	-7986	gene_body	TRUE
chr4	138215800	138218399	86	38	5.42731e-13	2.38161	2.81297e-12	Hp1bp3	803	TSS	TRUE
chr4	138249600	138256199	203	101	6.75785e-22	2.11509	6.53206e-21	Kif17	2464	TSS	TRUE
chr4	138304400	138304999	94	5	1.74533e-86	19.7839	1.72956e-84	Ddost	-30	TSS	TRUE
chr4	138323800	138326599	113	28	4.0122e-36	4.24693	8.35498e-35	Pink1	1106	TSS	TRUE
chr4	138366000	138369599	87	44	3.30582e-10	2.08076	1.3298e-09	Cda	191	TSS	TRUE
chr4	138433800	138435199	51	21	1.70805e-09	2.55568	6.35412e-09	Mul1	-171	TSS	TRUE
chr4	138445800	138450199	118	53	1.47183e-16	2.34294	1.00044e-15	Camk2n1	-6314	intergenic	TRUE
chr4	138911400	138914799	89	43	2.27127e-11	2.17809	1.022e-10	Otud3	844	TSS	TRUE
chr4	139130200	139131999	82	25	2.63186e-21	3.45167	2.45037e-20	Minos1	12	TSS	TRUE
chr4	139191200	139195999	180	75	1.19698e-27	2.52561	1.61798e-26	Capzb	700	TSS	TRUE
chr4	139307000	139312599	194	83	2.85298e-28	2.45968	3.98518e-27	Pqlc2	884	TSS	TRUE
chr4	139379600	139381599	61	27	9.0029e-10	2.3775	3.4516e-09	2700016F22Rik	-221	TSS	TRUE
chr4	139622200	139623399	58	24	1.92198e-10	2.54315	7.90809e-10	Aldh4a1	-66	TSS	TRUE
chr4	139830600	139833999	91	29	3.90168e-22	3.30216	3.82574e-21	Pax7	1227	TSS	TRUE
chr4	140698400	140701999	105	32	1.19264e-26	3.45298	1.5224e-25	Rcc2	-341	TSS	TRUE
chr4	141000200	141023599	862	422	6.16272e-89	2.14956	6.50656e-87	Mfap2	1481	TSS	TRUE
chr4	141060000	141061399	124	11	4.24488e-87	11.8627	4.2721e-85	Crocc	-150	TSS	TRUE
chr4	141138400	141139999	97	28	1.8023e-26	3.6456	2.27365e-25	Szrd1	574	TSS	TRUE
chr4	141146600	141149399	87	35	2.61379e-15	2.61581	1.6289e-14	Fbxo42	86	TSS	TRUE
chr4	141242800	141249799	249	104	3.20863e-37	2.51954	7.00104e-36	Arhgef19	3430	TSS	TRUE
chr4	141286800	141288199	64	18	8.65558e-19	3.74164	6.86672e-18	Gm13056	9060	intergenic	TRUE
chr4	141289000	141294599	145	72	2.64044e-16	2.11929	1.7649e-15	Epha2	-9440	intergenic	TRUE
chr4	141299600	141306599	245	100	3.65011e-38	2.57823	8.3031e-37	Epha2	1859	TSS	TRUE
chr4	141420000	141427599	234	98	6.00128e-35	2.51272	1.18164e-33	Hspb7	3020	TSS	TRUE
chr4	141443200	141445999	76	36	2.2801e-10	2.2216	9.32045e-10	Zbtb17	-84	TSS	TRUE
chr4	141528800	141531799	85	37	3.37808e-13	2.41753	1.78484e-12	Spen	8296	gene_body	TRUE
chr4	141536200	141538999	111	27	3.19651e-36	4.32628	6.68722e-35	Spen	996	TSS	TRUE
chr4	141543800	141550199	174	87	7.19385e-19	2.10468	5.75203e-18	B330016D10Rik	810	TSS	TRUE
chr4	141598800	141604999	207	96	8.93517e-26	2.2691	1.08422e-24	Fblim1	4151	gene_body	TRUE
chr4	141609600	141619199	315	161	7.65587e-31	2.05892	1.22722e-29	AI507597	373	TSS	TRUE
chr4	141721800	141723999	67	19	2.20813e-19	3.71087	1.82281e-18	Ddi2	518	TSS	TRUE
chr4	141789600	141794199	179	64	3.85712e-35	2.94326	7.65797e-34	Dnajc16	-1009	TSS	TRUE
chr4	141866600	141868399	73	34	2.40109e-10	2.25943	9.79466e-10	Efhd2	7419	gene_body	TRUE
chr4	141869200	141873199	121	54	3.99746e-17	2.35802	2.83441e-16	Efhd2	3719	gene_body	TRUE
chr4	141874200	141875799	68	21	8.89866e-18	3.40757	6.62677e-17	Efhd2	-80	TSS	TRUE
chr4	143161400	143163199	89	29	4.34074e-21	3.22959	3.98597e-20	Gm13039	-4303	gene_body	TRUE
chr4	143297000	143301199	102	44	1.15035e-15	2.43951	7.33999e-15	Pdpn	463	TSS	TRUE
chr4	143411800	143413199	70	13	2.01263e-30	5.66643	3.1475e-29	Pramef8	73	TSS	TRUE
chr4	144889600	144894999	164	74	5.39284e-22	2.33221	5.24407e-21	Dhrs3	-777	TSS	TRUE
chr4	145194400	145196799	81	36	3.12144e-12	2.36776	1.51644e-11	Vps13d	-595	TSS	TRUE
chr4	145245000	145248199	113	54	3.39279e-14	2.20211	1.93639e-13	Tnfrsf1b	269	TSS	TRUE
chr4	146065800	146067599	70	35	8.84894e-09	2.10468	3.04718e-08	Gm13034	-1052	intergenic	TRUE
chr4	147867600	147870199	161	41	6.16511e-49	4.13235	2.13151e-47	Fv1	-79	TSS	TRUE
chr4	147903000	147905199	93	34	9.72264e-19	2.87845	7.69703e-18	Mfn2	603	TSS	TRUE
chr4	147935200	147936999	63	25	6.68212e-12	2.65189	3.16064e-11	Plod1	666	TSS	TRUE
chr4	148038200	148046599	314	161	1.5859e-30	2.05239	2.49439e-29	Mthfr	1208	TSS	TRUE
chr4	148085600	148088599	131	53	9.20616e-22	2.60106	8.84371e-21	Agtrap	930	TSS	TRUE
chr4	148137400	148141199	182	48	6.97757e-53	3.99011	2.76581e-51	Mir7022	7695	gene_body	TRUE
chr4	148151600	148153799	69	33	1.98306e-09	2.20034	7.32982e-09	Fbxo6	-565	TSS	TRUE
chr4	148443800	148445999	92	28	1.12301e-23	3.45768	1.20811e-22	Ubiad1	-129	TSS	TRUE
chr4	148447200	148449399	169	33	9.75318e-67	5.38924	5.99628e-65	Mtor	-311	TSS	TRUE
chr4	148590800	148596599	308	93	2.1669e-74	3.48516	1.62384e-72	Srm	2196	TSS	TRUE
chr4	148625200	148630399	172	49	8.253e-46	3.69392	2.54217e-44	Tardbp	-781	TSS	TRUE
chr4	148803600	148807399	95	49	1.56299e-10	2.04025	6.48862e-10	Casz1	1070	TSS	TRUE
chr4	149098000	149099999	86	26	1.83526e-22	3.48081	1.84068e-21	Pex14	875	TSS	TRUE
chr4	149104000	149105599	63	28	5.84774e-10	2.36776	2.29272e-09	Dffa	653	TSS	TRUE
chr4	149135800	149138599	93	32	2.1158e-20	3.05836	1.86481e-19	Apitd1	347	TSS	TRUE
chr4	149165000	149167399	174	39	3.27821e-60	4.69504	1.64413e-58	Pgd	506	TSS	TRUE
chr4	149306000	149309199	273	52	1.49681e-108	5.52477	2.20319e-106	Kif1b	91	TSS	TRUE
chr4	149425400	149427999	142	37	2.24009e-42	4.0387	6.09058e-41	Ube4b	48	TSS	TRUE
chr4	149517600	149522599	175	91	2.13471e-17	2.02373	1.54589e-16	Ctnnbip1	1863	TSS	TRUE
chr4	149584600	149590199	167	74	3.97546e-23	2.37487	4.12215e-22	Clstn1	931	TSS	TRUE
chr4	149773600	149776399	98	42	2.65771e-15	2.45545	1.65525e-14	Slc25a33	-723	TSS	TRUE
chr4	149777200	149780799	111	57	4.34416e-12	2.04929	2.08678e-11	Gm13073	1713	TSS	TRUE
chr4	149893600	149895599	66	26	1.66314e-12	2.67132	8.29104e-12	Gm13070	-9406	intergenic	TRUE
chr4	149896400	149901799	155	66	3.1746e-23	2.4714	3.31494e-22	Gm13070	-4906	gene_body	TRUE
chr4	150230000	150232399	75	35	1.54237e-10	2.25501	6.41034e-10	Gm13094	3164	intergenic	TRUE
chr4	150236400	150251199	541	254	4.32458e-62	2.2414	2.30719e-60	Eno1	6847	TSS	TRUE
chr4	150280600	150282599	71	26	8.78625e-15	2.87369	5.25593e-14	Rere	-46	TSS	TRUE
chr4	150568600	150570199	65	21	3.58278e-16	3.25724	2.3751e-15	Gm13091	-856	gene_body	TRUE
chr4	150907600	150910799	122	58	2.5643e-15	2.21354	1.59939e-14	Park7	5236	gene_body	TRUE
chr4	150913000	150914999	125	27	1.38095e-45	4.87193	4.21639e-44	Park7	436	TSS	TRUE
chr4	151043400	151045599	90	22	1.11081e-29	4.30502	1.67541e-28	Per3	164	TSS	TRUE
chr4	151057400	151058799	104	27	8.13042e-32	4.05345	1.35922e-30	Vamp3	-147	TSS	TRUE
chr4	151860200	151863199	433	43	5.03848e-277	10.5968	4.37844e-274	Camta1	-31	TSS	TRUE
chr4	151995800	152000599	169	71	1.00532e-25	2.50486	1.21531e-24	Phf13	-1942	TSS	TRUE
chr4	152036600	152042799	229	113	7.21435e-25	2.13261	8.31214e-24	Nol9	363	TSS	TRUE
chr4	152114200	152121599	274	143	7.90627e-26	2.01637	9.61433e-25	Tnfrsf25	1965	TSS	TRUE
chr4	152176600	152180799	129	49	1.00541e-23	2.77044	1.08482e-22	Acot7	565	TSS	TRUE
chr4	152182800	152186799	90	29	1.30844e-21	3.26588	1.24332e-20	Acot7	6665	gene_body	TRUE
chr4	152272000	152277799	157	70	1.26582e-21	2.36024	1.20484e-20	Gpr153	667	TSS	TRUE
chr4	152324400	152326399	80	22	1.68417e-23	3.82668	1.78901e-22	Rpl22	-467	TSS	TRUE
chr4	152475800	152479199	164	38	4.99249e-55	4.54167	2.13839e-53	Kcnab2	370	TSS	TRUE
chr4	153956800	153958199	70	18	2.0436e-22	4.09242	2.04464e-21	A430005L14Rik	262	TSS	TRUE
chr4	153974600	153975799	72	19	2.2964e-22	3.98781	2.28896e-21	Cep104	5	TSS	TRUE
chr4	154159800	154161599	207	14	4.5184e-166	15.5596	1.52371e-163	Tprgl	-34	TSS	TRUE
chr4	154633400	154638399	131	66	1.75163e-14	2.08873	1.02397e-13	Prdm16	965	TSS	TRUE
chr4	154639200	154642399	101	44	2.85191e-15	2.41559	1.77242e-14	Gm13111	3223	gene_body	TRUE
chr4	154904200	154905199	78	17	3.84931e-29	4.82837	5.62739e-28	Fam213b	-5662	intergenic	TRUE
chr4	154959000	154964799	212	111	2.60065e-20	2.00987	2.27837e-19	Gm20421	-222	TSS	TRUE
chr4	155082400	155087999	218	91	6.64748e-33	2.52098	1.17338e-31	Rer1	1172	TSS	TRUE
chr4	155223200	155227599	159	78	3.91448e-18	2.14515	2.98444e-17	Ski	-2808	intergenic	TRUE
chr4	155245200	155247199	81	36	3.12144e-12	2.36776	1.51644e-11	Faap20	-3766	intergenic	TRUE
chr4	155479800	155483599	106	53	2.72421e-12	2.10468	1.33191e-11	Gnb1	-9661	intergenic	TRUE
chr4	155488200	155495399	205	99	1.56201e-23	2.17908	1.66237e-22	Gnb1	438	TSS	TRUE
chr4	155562200	155564999	132	38	2.7908e-35	3.65549	5.57518e-34	Nadk	1221	TSS	TRUE
chr4	155600800	155602999	103	15	7.40294e-53	7.22605	2.92544e-51	Slc35e2	483	TSS	TRUE
chr4	155623800	155625399	87	29	4.62268e-20	3.15701	3.99904e-19	Gm16023	154	TSS	TRUE
chr4	155668400	155671399	138	47	1.34462e-29	3.08984	2.01728e-28	Mib2	-702	TSS	TRUE
chr4	155704200	155705799	88	37	2.10861e-14	2.50286	1.22638e-13	Ssu72	199	TSS	TRUE
chr4	155769400	155771599	108	44	4.06993e-18	2.58301	3.09929e-17	Gm26840	530	TSS	TRUE
chr4	155783600	155785799	69	31	1.59371e-10	2.3423	6.6061e-10	Tmem88b	1173	gene_body	TRUE
chr4	155803400	155807199	104	42	8.94248e-18	2.60579	6.65337e-17	Mrpl20	1649	TSS	TRUE
chr4	155812000	155813199	109	20	2.00826e-46	5.73524	6.30203e-45	Ccnl2	110	TSS	TRUE
chr4	155831200	155832799	70	34	2.85518e-09	2.16658	1.03784e-08	Aurkaip1	648	TSS	TRUE
chr4	155838800	155843999	203	99	7.5132e-23	2.15782	7.65862e-22	Mxra8os	-1222	TSS	TRUE
chr4	155865400	155872799	201	105	1.81256e-19	2.01447	1.50369e-18	Cptp	339	TSS	TRUE
chr4	155991600	155996199	177	49	1.05912e-48	3.8013	3.63399e-47	Sdf4	988	TSS	TRUE
chr4	156045800	156048799	93	47	8.59083e-11	2.08228	3.648e-10	Mir200a	7684	gene_body	TRUE
chr4	156108000	156111199	102	51	6.66807e-12	2.10468	3.15515e-11	9430015G10Rik	-382	TSS	TRUE
chr4	156191000	156198799	253	133	1.31682e-23	2.00182	1.40939e-22	Agrn	2587	TSS	TRUE
chr4	156202600	156205399	91	43	4.45446e-12	2.22704	2.13807e-11	AW011738	695	TSS	TRUE
chr5	3341000	3347999	321	138	6.93288e-45	2.44783	2.06379e-43	Cdk6	606	TSS	TRUE
chr5	3594800	3596999	130	50	1.96253e-23	2.73608	2.07203e-22	Pex1	-166	TSS	TRUE
chr5	3801400	3803999	139	50	1.47205e-27	2.9255	1.97974e-26	Ankib1	224	TSS	TRUE
chr5	4102400	4105199	265	60	2.13619e-89	4.64782	2.28203e-87	Cyp51	945	TSS	TRUE
chr5	4753400	4758999	295	119	2.06462e-46	2.60874	6.46991e-45	Fzd1	1834	TSS	TRUE
chr5	5513400	5516199	149	54	4.70955e-29	2.90367	6.85836e-28	Cldn12	111	TSS	TRUE
chr5	5557800	5559999	71	28	2.83645e-13	2.66843	1.50935e-12	Gtpbp10	637	TSS	TRUE
chr5	5693600	5694599	61	9	4.36984e-32	7.13251	7.43746e-31	Steap2	477	TSS	TRUE
chr5	5749000	5751599	73	31	4.19333e-12	2.47809	2.01669e-11	Steap1	-974	TSS	TRUE
chr5	8422000	8424399	127	36	1.15103e-34	3.71241	2.23614e-33	Slc25a40	349	TSS	TRUE
chr5	8797800	8798799	67	22	2.88449e-16	3.20485	1.92361e-15	Abcb1b	113	TSS	TRUE
chr5	8996400	8997799	146	27	7.17984e-61	5.69042	3.69104e-59	Gm37153	-59	TSS	TRUE
chr5	9099600	9102799	104	46	2.98063e-15	2.3792	1.84796e-14	Tmem243	531	TSS	TRUE
chr5	13877600	13880199	80	39	3.02811e-10	2.15864	1.22283e-09	Dnd1-ps	-319	TSS	TRUE
chr5	20881200	20882999	383	21	0	19.1926	0	Phtf2	23	TSS	TRUE
chr5	20951000	20952999	132	24	4.21979e-56	5.78786	1.87129e-54	A630072M18Rik	1010	gene_body	TRUE
chr5	21053600	21057599	100	42	4.13906e-16	2.50557	2.73005e-15	Ptpn12	310	TSS	TRUE
chr5	21424000	21425599	92	19	1.12612e-35	5.09553	2.29479e-34	Ccdc146	-123	TSS	TRUE
chr5	21645000	21646799	90	29	1.30844e-21	3.26588	1.24332e-20	Armc10	20	TSS	TRUE
chr5	21700800	21702799	153	49	2.09402e-35	3.28587	4.20181e-34	Napepld	-406	TSS	TRUE
chr5	21786200	21787199	49	13	7.25995e-16	3.9665	4.70004e-15	Psmc2	1416	gene_body	TRUE
chr5	23432800	23435599	169	37	6.26951e-60	4.80662	3.11326e-58	Kmt2e	-241	TSS	TRUE
chr5	23674800	23676799	88	21	8.50971e-30	4.4098	1.29299e-28	Gm43566	-254	TSS	TRUE
chr5	23849000	23851399	99	30	1.94603e-25	3.47271	2.31413e-24	2700038G22Rik	-397	TSS	TRUE
chr5	24029800	24031599	132	20	5.37545e-65	6.94543	3.11817e-63	Fam126a	-388	TSS	TRUE
chr5	24164800	24165999	55	20	4.84822e-12	2.89393	2.31881e-11	Nupl2	436	TSS	TRUE
chr5	24261800	24267799	172	73	1.11625e-25	2.47948	1.34635e-24	Gm9836	7977	intergenic	TRUE
chr5	24385400	24390599	201	97	3.7769e-23	2.18062	3.92527e-22	Atg9b	4142	gene_body	TRUE
chr5	24391600	24394999	126	65	2.54395e-13	2.03992	1.35689e-12	Abcb8	-376	TSS	TRUE
chr5	24438000	24448199	393	188	5.65869e-44	2.19983	1.63704e-42	Fastk	2093	TSS	TRUE
chr5	24451400	24453599	81	35	7.86433e-13	2.43541	4.02781e-12	Agap3	322	TSS	TRUE
chr5	24576400	24577799	71	19	9.3254e-22	3.93242	8.94969e-21	Abcf2	366	TSS	TRUE
chr5	24684600	24686399	95	23	1.66394e-31	4.34661	2.74667e-30	Nub1	-32	TSS	TRUE
chr5	24728000	24730399	72	32	4.25811e-11	2.36776	1.86143e-10	Wdr86	1526	gene_body	TRUE
chr5	24750000	24751999	86	36	3.17586e-14	2.51392	1.8174e-13	Crygn	7007	gene_body	TRUE
chr5	24841600	24844199	127	33	2.81485e-38	4.04991	6.44528e-37	Rheb	-276	TSS	TRUE
chr5	24907600	24909199	83	21	1.36194e-26	4.15924	1.7319e-25	Prkag2os1	5830	gene_body	TRUE
chr5	25099400	25101799	70	36	2.58934e-08	2.04621	8.4202e-08	Prkag2	41	TSS	TRUE
chr5	25497400	25500399	154	36	2.30605e-51	4.50167	8.61917e-50	Kmt2c	-155	TSS	TRUE
chr5	25526000	25532999	215	90	2.53648e-32	2.51392	4.36144e-31	1700096K18Rik	-513	TSS	TRUE
chr5	27789800	27792199	110	42	2.14896e-20	2.75612	1.89311e-19	Paxip1	549	TSS	TRUE
chr5	28069600	28072999	171	62	5.55224e-33	2.90241	9.84286e-32	Insig1	-63	TSS	TRUE
chr5	28315800	28317999	75	14	2.8244e-32	5.63752	4.84269e-31	Rbm33	-277	TSS	TRUE
chr5	29376400	29378999	102	41	1.32107e-17	2.61801	9.71779e-17	Lmbr1	683	TSS	TRUE
chr5	29434400	29436799	125	29	1.71112e-42	4.53594	4.67063e-41	Nom1	935	TSS	TRUE
chr5	29477200	29479199	69	36	5.43966e-08	2.01698	1.70109e-07	Mnx1	269	TSS	TRUE
chr5	29569000	29570199	68	21	8.89866e-18	3.40757	6.62677e-17	Ube3c	357	TSS	TRUE
chr5	29734600	29738399	145	74	2.20789e-15	2.06201	1.38445e-14	Dnajb6	466	TSS	TRUE
chr5	30072200	30073799	58	25	8.47114e-10	2.44142	3.26018e-09	Tyms	580	TSS	TRUE
chr5	30154600	30155999	89	23	1.03861e-27	4.07209	1.41066e-26	Hadhb	51	TSS	TRUE
chr5	30232000	30234199	122	36	7.91341e-32	3.56626	1.32441e-30	Selenoi	518	TSS	TRUE
chr5	30666400	30668599	101	27	5.46463e-30	3.93652	8.38064e-29	Cenpa	722	TSS	TRUE
chr5	30868000	30869999	78	34	2.98962e-12	2.41419	1.45553e-11	Tmem214	987	TSS	TRUE
chr5	30887200	30890599	127	50	4.07187e-22	2.67294	3.98526e-21	Agbl5	-35	TSS	TRUE
chr5	30902000	30911399	281	136	2.65486e-31	2.17432	4.34509e-30	Ost4	1087	TSS	TRUE
chr5	30923800	30925799	82	43	4.80991e-09	2.00678	1.70718e-08	Khk	3368	gene_body	TRUE
chr5	30949000	30952599	114	57	4.5553e-13	2.10468	2.37833e-12	Abhd1	733	TSS	TRUE
chr5	30958000	30960599	92	39	9.24866e-15	2.48244	5.52085e-14	Preb	1060	TSS	TRUE
chr5	31047000	31049599	144	48	1.03401e-31	3.15701	1.72003e-30	Atraid	-21	TSS	TRUE
chr5	31051200	31055399	123	62	1.04369e-13	2.0877	5.74975e-13	Cad	-1480	TSS	TRUE
chr5	31056200	31060399	113	59	7.65782e-12	2.01549	3.59954e-11	Cad	3519	gene_body	TRUE
chr5	31178400	31182199	150	57	3.33194e-27	2.76931	4.40245e-26	Gtf3c2	-156	TSS	TRUE
chr5	31192400	31194999	137	42	8.40114e-34	3.43262	1.55906e-32	Eif2b4	-270	TSS	TRUE
chr5	31219800	31221999	143	36	2.70694e-44	4.18012	7.91723e-43	Ppm1g	-213	TSS	TRUE
chr5	31239800	31242399	113	25	1.64783e-40	4.75657	4.12531e-39	Gm9970	131	TSS	TRUE
chr5	31294200	31295999	65	30	1.40748e-09	2.28006	5.28053e-09	Fndc4	835	TSS	TRUE
chr5	31494400	31495599	108	17	3.95871e-52	6.68544	1.52114e-50	4930566F21Rik	178	TSS	TRUE
chr5	31525800	31527599	63	28	5.84774e-10	2.36776	2.29272e-09	Supt7l	72	TSS	TRUE
chr5	31696200	31699399	106	49	2.58493e-14	2.27649	1.48904e-13	Bre	115	TSS	TRUE
chr5	32132800	32134199	55	20	4.84822e-12	2.89393	2.31881e-11	Gm10463	-329	TSS	TRUE
chr5	32135200	32139599	224	64	1.06871e-58	3.68318	5.09416e-57	Fosl2	1598	TSS	TRUE
chr5	32458400	32460599	89	27	4.54163e-23	3.46882	4.68983e-22	Ppp1cb	347	TSS	TRUE
chr5	32610200	32611799	68	20	7.79663e-19	3.57795	6.20818e-18	Yes1	-184	TSS	TRUE
chr5	32785400	32786399	74	6	7.2906e-56	12.9788	3.22041e-54	Pisd	-254	TSS	TRUE
chr5	32853200	32854999	62	27	3.62916e-10	2.41648	1.45372e-09	Prr14l	155	TSS	TRUE
chr5	32863200	32864199	53	7	1.74814e-30	7.9677	2.74478e-29	Depdc5	-21	TSS	TRUE
chr5	33013600	33019799	173	89	1.21835e-17	2.04555	8.99001e-17	Ywhah	-2116	TSS	TRUE
chr5	33272200	33275399	110	56	3.23178e-12	2.06709	1.56583e-11	Ctbp1	1193	TSS	TRUE
chr5	33334800	33336999	142	28	5.27933e-56	5.33685	2.33656e-54	Maea	390	TSS	TRUE
chr5	33377800	33380399	100	35	2.9173e-21	3.00668	2.70692e-20	Uvssa	403	TSS	TRUE
chr5	33628800	33631799	174	63	1.36977e-33	2.90646	2.51205e-32	Gm9903	374	TSS	TRUE
chr5	33651800	33653199	159	27	5.40088e-71	6.1971	3.68663e-69	Slbp	-155	TSS	TRUE
chr5	33656800	33662399	221	97	1.97123e-30	2.39759	3.08756e-29	Tmem129	-1184	TSS	TRUE
chr5	33781200	33783199	66	25	3.04216e-13	2.77817	1.61339e-12	Letm1	616	TSS	TRUE
chr5	33818600	33821799	97	46	1.17799e-12	2.21906	5.94193e-12	Whsc1	-525	TSS	TRUE
chr5	33935000	33936799	95	33	1.59865e-20	3.02946	1.4173e-19	Nelfa	512	TSS	TRUE
chr5	33981800	33985199	113	58	2.7779e-12	2.05024	1.35661e-11	Gm1673	66	TSS	TRUE
chr5	33994200	33996599	93	36	3.2282e-17	2.71854	2.30999e-16	Nat8l	-584	TSS	TRUE
chr5	34169200	34169999	112	14	8.63981e-64	8.4187	4.83786e-62	Haus3	-152	TSS	TRUE
chr5	34335600	34337599	183	40	8.83986e-65	4.81444	5.10813e-63	Rnf4	310	TSS	TRUE
chr5	34369200	34370999	69	16	1.44622e-24	4.53821	1.63584e-23	Fam193a	166	TSS	TRUE
chr5	34512000	34515599	122	54	1.65836e-17	2.3775	1.21043e-16	Tnip2	190	TSS	TRUE
chr5	34519200	34521999	96	50	2.07744e-10	2.02049	8.5229e-10	Sh3bp2	-5246	intergenic	TRUE
chr5	34658200	34661399	131	58	1.24165e-18	2.37683	9.76636e-18	Nop14	347	TSS	TRUE
chr5	35574200	35578399	143	70	1.3657e-16	2.14978	9.32154e-16	Trmt44	-1230	TSS	TRUE
chr5	35725400	35727599	75	39	1.40347e-08	2.02373	4.71786e-08	Gm15650	3944	gene_body	TRUE
chr5	35891000	35894999	150	71	1.62349e-18	2.22325	1.26683e-17	Afap1	-319	TSS	TRUE
chr5	36464400	36465799	166	21	2.09828e-92	8.31848	2.34696e-90	Grpel1	101	TSS	TRUE
chr5	36577400	36584399	301	138	2.52233e-37	2.29532	5.54104e-36	Tbc1d14	5364	gene_body	TRUE
chr5	36795800	36797399	106	30	2.2103e-29	3.71826	3.28011e-28	Mrfap1	171	TSS	TRUE
chr5	36984000	36989599	312	91	1.02728e-78	3.60801	8.59647e-77	Wfs1	2404	TSS	TRUE
chr5	37336000	37339199	143	53	4.70683e-27	2.83933	6.17125e-26	Evc2	-899	TSS	TRUE
chr5	37826000	37829799	94	41	2.50742e-14	2.41268	1.44929e-13	Msx1	-3317	intergenic	TRUE
chr5	38038800	38039799	50	19	1.72861e-10	2.76931	7.14594e-10	Stx18	557	gene_body	TRUE
chr5	38219400	38221599	107	43	2.27256e-18	2.61861	1.76039e-17	Lyar	29	TSS	TRUE
chr5	41706800	41708799	109	28	1.29594e-33	4.0966	2.38053e-32	Rab28	356	TSS	TRUE
chr5	41761000	41763999	108	54	1.74166e-12	2.10468	8.66859e-12	Nkx3-2	2000	gene_body	TRUE
chr5	41842600	41845599	125	57	6.15996e-17	2.30776	4.31259e-16	Bod1l	214	TSS	TRUE
chr5	43231600	43235599	159	35	3.08042e-56	4.78062	1.37006e-54	Cpeb2	429	TSS	TRUE
chr5	43779800	43783199	123	44	7.59365e-25	2.94176	8.72913e-24	Gm43182	-743	TSS	TRUE
chr5	45444000	45451999	310	163	1.99059e-28	2.00138	2.80352e-27	Qdpr	2235	TSS	TRUE
chr5	45668800	45671599	168	35	1.67123e-62	5.05122	8.99042e-61	Ncapg	280	TSS	TRUE
chr5	45855600	45858399	154	45	5.02473e-40	3.60133	1.24007e-38	Lcorl	614	TSS	TRUE
chr5	47982600	47986799	258	86	6.31608e-55	3.15701	2.6951e-53	Slit2	1561	TSS	TRUE
chr5	52114200	52116399	72	29	5.24348e-13	2.6127	2.72254e-12	Gm43177	-2012	intergenic	TRUE
chr5	52189400	52191199	79	30	2.2315e-15	2.77116	1.39848e-14	Dhx15	213	TSS	TRUE
chr5	52741200	52742999	72	35	1.8221e-09	2.16481	6.76168e-09	Pi4k2b	525	TSS	TRUE
chr5	52832600	52836399	170	60	3.92781e-34	2.98162	7.45285e-33	Anapc4	487	TSS	TRUE
chr5	53809400	53810199	55	18	8.46881e-14	3.21548	4.70249e-13	Tbc1d19	172	TSS	TRUE
chr5	63648800	63650999	83	39	2.62279e-11	2.23959	1.17304e-10	Nwd2	791	TSS	TRUE
chr5	63967000	63971799	234	80	2.79268e-48	3.07809	9.40006e-47	Rell1	-503	TSS	TRUE
chr5	64092000	64096599	203	103	5.61266e-21	2.07402	5.11753e-20	Pgm1	1349	TSS	TRUE
chr5	64968600	64974399	252	121	8.91675e-29	2.19165	1.27793e-27	Gm43627	-1150	TSS	TRUE
chr5	65335200	65338799	114	53	4.46813e-15	2.26352	2.73344e-14	Rfc1	-1330	TSS	TRUE
chr5	65389000	65391799	124	56	4.02698e-17	2.33018	2.8549e-16	Rpl9	1043	TSS	TRUE
chr5	65434600	65439999	264	116	7.69626e-36	2.39498	1.58441e-34	Ugdh	-1351	TSS	TRUE
chr5	65696600	65697399	45	4	2.0933e-33	11.8388	3.79888e-32	Pds5a	1167	gene_body	TRUE
chr5	65763200	65765999	119	29	1.40455e-38	4.31821	3.25231e-37	N4bp2os	-734	TSS	TRUE
chr5	67260600	67262399	96	35	2.38238e-19	2.88641	1.96236e-18	Gm42670	-238	TSS	TRUE
chr5	67306600	67308999	105	34	1.12923e-24	3.24987	1.28388e-23	Slc30a9	844	TSS	TRUE
chr5	67606800	67608799	82	37	4.8868e-12	2.33221	2.3364e-11	1700025A08Rik	25	TSS	TRUE
chr5	72201400	72203799	97	37	2.86912e-18	2.75883	2.20755e-17	Atp10d	-729	TSS	TRUE
chr5	72503200	72505999	95	40	2.40393e-15	2.4993	1.5032e-14	Corin	-127	TSS	TRUE
chr5	72558400	72560199	96	35	2.38238e-19	2.88641	1.96236e-18	Nfxl1	383	TSS	TRUE
chr5	72579800	72581599	72	31	1.06234e-11	2.44414	4.92968e-11	Zar1	553	TSS	TRUE
chr5	72645600	72648799	103	42	2.36592e-17	2.58073	1.70744e-16	Nipal1	-595	TSS	TRUE
chr5	72816000	72819199	85	36	8.13444e-14	2.48469	4.52043e-13	Gm43499	-5526	gene_body	TRUE
chr5	72912400	72917599	269	113	1.28711e-39	2.50512	3.12195e-38	Gm9870	-58	TSS	TRUE
chr5	73254600	73257799	417	42	1.38452e-264	10.4482	1.04273e-261	Fryl	418	TSS	TRUE
chr5	73291800	73293799	97	40	3.60796e-16	2.55192	2.38916e-15	Ociad1	7	TSS	TRUE
chr5	74066000	74069599	150	66	2.89527e-21	2.39168	2.68758e-20	Usp46	619	TSS	TRUE
chr5	74088600	74094399	271	104	1.5493e-46	2.74215	4.88213e-45	Dancr	-1560	TSS	TRUE
chr5	74529800	74532199	112	58	5.79084e-12	2.0321	2.75203e-11	Scfd2	748	TSS	TRUE
chr5	74534000	74536199	109	42	6.00601e-20	2.73107	5.14599e-19	Fip1l1	-349	TSS	TRUE
chr5	75144400	75157199	504	227	3.71182e-63	2.33647	2.03063e-61	Pdgfra	-1506	TSS	TRUE
chr5	76303000	76305999	100	31	5.87934e-25	3.39464	6.80347e-24	Clock	291	TSS	TRUE
chr5	76529000	76530599	153	39	1.39777e-46	4.1284	4.41388e-45	Exoc1	488	TSS	TRUE
chr5	76904400	76909199	160	73	4.59515e-21	2.30649	4.21188e-20	Aasdh	-1373	TSS	TRUE
chr5	76950800	76952799	185	49	1.87502e-53	3.97311	7.57856e-52	Ppat	-228	TSS	TRUE
chr5	76974000	76976599	88	43	5.04658e-11	2.15362	2.19432e-10	Srp72	616	TSS	TRUE
chr5	77263400	77268599	150	59	9.27429e-26	2.67543	1.12446e-24	Rest	508	TSS	TRUE
chr5	77406800	77409599	91	30	3.46233e-21	3.19209	3.19787e-20	Igfbp7	-159	TSS	TRUE
chr5	81019600	81022999	135	56	1.89893e-21	2.53689	1.78008e-20	Adgrl3	728	TSS	TRUE
chr5	86064000	86067799	157	65	1.14606e-24	2.5418	1.30219e-23	Cenpc1	-317	TSS	TRUE
chr5	86172200	86173799	134	26	9.06743e-54	5.42359	3.69467e-52	Uba6	-197	TSS	TRUE
chr5	88553200	88555199	105	45	3.02963e-16	2.45545	2.01803e-15	Utp3	-262	TSS	TRUE
chr5	88719800	88723599	161	70	3.67135e-23	2.42038	3.81821e-22	Mob1b	844	TSS	TRUE
chr5	88883400	88888599	164	82	6.63226e-18	2.10468	4.98128e-17	Slc4a4	-818	TSS	TRUE
chr5	90364200	90367999	165	49	7.24279e-42	3.54359	1.91901e-40	Ankrd17	476	TSS	TRUE
chr5	90930800	90932199	61	24	9.77237e-12	2.67469	4.55158e-11	Mthfd2l	219	TSS	TRUE
chr5	91960000	91963399	127	59	1.39248e-16	2.2652	9.49073e-16	Rchy1	1367	TSS	TRUE
chr5	92041400	92044199	135	42	1.00296e-32	3.38251	1.7587e-31	Cdkl2	241	TSS	TRUE
chr5	92083000	92086999	196	100	4.44366e-20	2.06258	3.84748e-19	G3bp2	-1281	TSS	TRUE
chr5	92276600	92278799	98	49	1.63324e-11	2.10468	7.45749e-11	Naaa	469	TSS	TRUE
chr5	92309400	92311999	77	40	8.94047e-09	2.02575	3.07553e-08	Sdad1	-676	TSS	TRUE
chr5	92434200	92435799	103	31	1.36e-26	3.49648	1.73017e-25	Nup54	218	TSS	TRUE
chr5	92502400	92506599	176	80	4.03688e-23	2.31514	4.18391e-22	Scarb2	1136	TSS	TRUE
chr5	93091200	93094199	159	54	7.00327e-34	3.09855	1.30608e-32	Gm43173	650	TSS	TRUE
chr5	93204800	93206999	113	47	3.18724e-18	2.53009	2.44483e-17	Ccni	594	TSS	TRUE
chr5	93267000	93268999	151	38	1.1914e-46	4.18166	3.77805e-45	Ccng2	742	TSS	TRUE
chr5	96160200	96164399	113	58	2.7779e-12	2.05024	1.35661e-11	Cnot6l	-310	TSS	TRUE
chr5	96995200	96998599	98	36	1.71505e-19	2.8647	1.42567e-18	Gm9484	463	TSS	TRUE
chr5	97111000	97111999	96	22	1.28059e-33	4.59202	2.35425e-32	Paqr3	95	TSS	TRUE
chr5	98030200	98031799	89	31	2.70354e-19	3.02123	2.2184e-18	Antxr2	-38	TSS	TRUE
chr5	99976800	99982799	217	86	8.42245e-36	2.65532	1.72683e-34	4930524J08Rik	738	TSS	TRUE
chr5	100037400	100045999	419	159	6.08248e-72	2.77314	4.27457e-70	Enoph1	1714	TSS	TRUE
chr5	100516600	100519799	166	72	6.44761e-24	2.42622	7.04947e-23	Cops4	-109	TSS	TRUE
chr5	102068800	102073599	145	76	1.6603e-14	2.00775	9.72971e-14	Gm29707	981	TSS	TRUE
chr5	103691600	103694399	155	55	4.40466e-31	2.96568	7.14037e-30	Aff1	625	TSS	TRUE
chr5	104458600	104460799	97	34	1.1976e-20	3.00226	1.07131e-19	Pkd2	249	TSS	TRUE
chr5	104934000	104934799	81	14	6.1194e-37	6.08852	1.3215e-35	Gm24097	-2251	intergenic	TRUE
chr5	105517200	105522199	164	86	4.00508e-16	2.00678	2.64342e-15	Lrrc8c	311	TSS	TRUE
chr5	105874000	105878399	213	74	3.73712e-43	3.02903	1.0463e-41	Zfp326	-368	TSS	TRUE
chr5	106694000	106697599	122	49	1.16357e-20	2.62011	1.04138e-19	Zfp644	770	TSS	TRUE
chr5	107720600	107726999	269	131	1.14994e-29	2.16091	1.73154e-28	Gfi1	2004	TSS	TRUE
chr5	107865600	107870199	166	64	3.44279e-29	2.7295	5.04943e-28	Gm43592	-574	TSS	TRUE
chr5	107898800	107901599	120	49	8.13191e-20	2.57715	6.91894e-19	Snord21	-302	TSS	TRUE
chr5	107984400	107987999	109	57	1.87069e-11	2.01236	8.47574e-11	Fam69a	884	TSS	TRUE
chr5	108065400	108066399	75	27	7.18347e-16	2.92316	4.65452e-15	Mtf2	157	TSS	TRUE
chr5	108131800	108133599	182	47	3.80367e-54	4.07501	1.56825e-52	Tmed5	-135	TSS	TRUE
chr5	108268200	108271599	126	64	9.05805e-14	2.07179	5.01735e-13	Dr1	1002	TSS	TRUE
chr5	108312200	108313799	91	42	1.29925e-12	2.28006	6.53102e-12	Gm43081	-251	TSS	TRUE
chr5	108365000	108367399	78	41	1.18282e-08	2.00201	4.01752e-08	Gm42517	346	TSS	TRUE
chr5	108460400	108463999	145	66	2.24319e-19	2.31195	1.8499e-18	Pcgf3	967	TSS	TRUE
chr5	108627200	108631199	174	56	1.12155e-39	3.26976	2.72769e-38	Gak	538	TSS	TRUE
chr5	108692000	108702399	451	227	9.11291e-45	2.09077	2.70029e-43	Fgfrl1	2931	TSS	TRUE
chr5	109551000	109560799	591	177	7.66792e-142	3.51374	2.01452e-139	Gm8493	-1744	TSS	TRUE
chr5	109751000	109753599	84	37	8.32627e-13	2.38909	4.25475e-12	4930522L14Rik	-703	TSS	TRUE
chr5	109922800	109924399	128	35	2.05895e-36	3.84855	4.34562e-35	Gm26808	-119	TSS	TRUE
chr5	109995400	109998199	146	53	1.91187e-28	2.89889	2.69558e-27	Zfp932	278	TSS	TRUE
chr5	110099800	110108399	497	257	4.49422e-46	2.03507	1.39099e-44	Plcxd1	3540	TSS	TRUE
chr5	110135600	110136399	75	18	1.32325e-25	4.38474	1.58776e-24	Chfr	150	TSS	TRUE
chr5	110173200	110177799	164	86	4.00508e-16	2.00678	2.64342e-15	Gm15787	1003	TSS	TRUE
chr5	110283400	110287799	195	59	6.83638e-48	3.47806	2.26815e-46	Pxmp2	585	TSS	TRUE
chr5	110375800	110379799	222	93	2.95026e-33	2.51203	5.31989e-32	Gm26711	-8035	gene_body	TRUE
chr5	110838600	110842399	175	91	2.13471e-17	2.02373	1.54589e-16	Chek2	516	TSS	TRUE
chr5	110978800	110980999	71	37	3.46179e-08	2.01935	1.10556e-07	Gm42778	1234	gene_body	TRUE
chr5	111330400	111332599	82	34	7.16288e-14	2.53799	3.99477e-13	Pitpnb	736	TSS	TRUE
chr5	111416200	111425599	427	165	4.05989e-71	2.72332	2.78389e-69	Gm43119	-2689	TSS	TRUE
chr5	112150800	112155399	188	96	2.62012e-19	2.06083	2.1521e-18	Gm42491	-3137	intergenic	TRUE
chr5	112275800	112277199	191	30	3.10298e-90	6.69988	3.37061e-88	Tpst2	-191	TSS	TRUE
chr5	113730200	113739799	543	259	3.00958e-60	2.20625	1.51613e-58	Ficd	-803	TSS	TRUE
chr5	113904800	113913199	300	129	4.38818e-42	2.4473	1.17472e-40	Coro1c	-242	TSS	TRUE
chr5	113914000	113916199	87	41	1.081e-11	2.23301	5.01188e-11	Coro1c	-6342	intergenic	TRUE
chr5	114664600	114668799	186	96	1.12953e-18	2.0389	8.90309e-18	Trpv4	-8279	intergenic	TRUE
chr5	114769400	114778399	325	156	1.70718e-36	2.19237	3.62009e-35	Git2	-405	TSS	TRUE
chr5	115152400	115163999	510	238	2.03622e-59	2.25501	9.90447e-58	Mlec	-21	TSS	TRUE
chr5	115191800	115193599	72	37	1.64775e-08	2.04779	5.48759e-08	Cabp1	1680	gene_body	TRUE
chr5	115271200	115275199	120	54	9.55869e-17	2.33853	6.59196e-16	Rnf10	-302	TSS	TRUE
chr5	115297600	115301999	264	77	5.3449e-67	3.60801	3.32679e-65	Dynll1	1198	TSS	TRUE
chr5	115325000	115327999	93	43	8.37424e-13	2.27599	4.27709e-12	Srsf9	-677	TSS	TRUE
chr5	115339000	115350599	510	241	7.16064e-58	2.22694	3.33239e-56	Triap1	3574	TSS	TRUE
chr5	115479600	115483399	117	59	3.98544e-13	2.08684	2.09071e-12	Sirt4	3224	gene_body	TRUE
chr5	115484200	115486799	114	38	1.38023e-25	3.15701	1.65437e-24	Sirt4	-775	TSS	TRUE
chr5	115488000	115492999	187	92	7.87709e-21	2.13899	7.12969e-20	Gm24407	245	TSS	TRUE
chr5	115838200	115855799	731	346	1.26438e-81	2.22329	1.15658e-79	Cit	1355	TSS	TRUE
chr5	116419800	116423999	174	57	9.67539e-39	3.2124	2.25483e-37	Hspb8	963	TSS	TRUE
chr5	116440600	116446999	241	124	9.6319e-24	2.04527	1.04151e-22	Srrm4os	5079	gene_body	TRUE
chr5	117118400	117122799	242	67	1.18091e-65	3.80098	7.01225e-64	Taok3	470	TSS	TRUE
chr5	117313400	117321999	306	146	6.22957e-35	2.20558	1.22445e-33	Vsig10	-1383	TSS	TRUE
chr5	117973600	117978599	198	87	1.93075e-27	2.39498	2.58203e-26	Gm25343	459	TSS	TRUE
chr5	118166800	118169599	90	47	7.97655e-10	2.01511	3.07743e-09	Hrk	3551	gene_body	TRUE
chr5	119666800	119676599	373	161	2.17089e-51	2.43802	8.13418e-50	Tbx3	1030	TSS	TRUE
chr5	119684000	119690999	168	87	6.12134e-17	2.0321	4.28887e-16	Tbx3os2	3717	gene_body	TRUE
chr5	119831200	119832799	65	27	2.17001e-11	2.53341	9.78139e-11	Gm43050	-80	TSS	TRUE
chr5	120284600	120288599	98	49	1.63324e-11	2.10468	7.45749e-11	Gm26474	-1126	TSS	TRUE
chr5	120431000	120433399	109	42	6.00601e-20	2.73107	5.14599e-19	Gm27199	-433	TSS	TRUE
chr5	120434400	120441199	250	109	1.47636e-34	2.41362	2.8498e-33	Gm27199	-6033	gene_body	TRUE
chr5	120500800	120506599	263	130	3.92108e-28	2.12896	5.4235e-27	Plbd2	-75	TSS	TRUE
chr5	120507400	120518399	483	233	1.4971e-52	2.18146	5.85721e-51	Slc8b1	1731	TSS	TRUE
chr5	120578200	120592799	808	375	8.30649e-94	2.26744	9.52674e-92	Tpcn1	3172	TSS	TRUE
chr5	120599000	120617199	900	392	1.81754e-118	2.41608	3.28525e-116	Rita1	4238	TSS	TRUE
chr5	121190400	121191999	70	29	3.68787e-12	2.54013	1.78052e-11	Ptpn11	196	TSS	TRUE
chr5	121219600	121220999	73	21	1.41978e-20	3.65813	1.26542e-19	Gm15800	80	TSS	TRUE
chr5	121584200	121586199	69	34	6.34363e-09	2.13563	2.2205e-08	Gm42879	-8495	gene_body	TRUE
chr5	121650800	121653999	106	54	7.90995e-12	2.0657	3.71399e-11	Acad10	8113	gene_body	TRUE
chr5	121659600	121663599	130	64	4.29257e-15	2.13756	2.63282e-14	Brap	1036	TSS	TRUE
chr5	121710200	121711599	61	24	9.77237e-12	2.67469	4.55158e-11	Atxn2	-709	intergenic	TRUE
chr5	122100200	122103199	94	48	1.16466e-10	2.06083	4.89024e-10	Myl2	716	TSS	TRUE
chr5	122351000	122354999	160	69	2.26772e-23	2.4402	2.387e-22	Rad9b	1231	TSS	TRUE
chr5	122370400	122372799	140	46	1.66681e-31	3.20277	2.74991e-30	Gpn3	-276	TSS	TRUE
chr5	122421600	122428799	254	129	1.17397e-25	2.07204	1.41371e-24	Anapc7	3506	TSS	TRUE
chr5	122500200	122506599	232	117	5.39621e-24	2.08669	5.91998e-23	Atp2a2	-1226	TSS	TRUE
chr5	122820800	122826799	272	130	3.46579e-31	2.20181	5.63962e-30	Anapc5	-2461	TSS	TRUE
chr5	122849600	122852999	174	64	8.40209e-33	2.86104	1.47848e-31	Rnf34	1251	TSS	TRUE
chr5	122983000	122990599	285	140	1.01967e-30	2.14226	1.62072e-29	Kdm2b	2505	TSS	TRUE
chr5	123011800	123017599	252	111	3.7218e-34	2.38909	7.07534e-33	Orai1	-374	TSS	TRUE
chr5	123115200	123121199	254	129	1.17397e-25	2.07204	1.41371e-24	Gm43413	7503	gene_body	TRUE
chr5	123128600	123133799	178	91	2.41022e-18	2.05842	1.86463e-17	Rhof	1260	TSS	TRUE
chr5	123134600	123140199	335	103	8.33669e-79	3.42265	7.02833e-77	4932422M17Rik	-1531	TSS	TRUE
chr5	123227400	123228799	73	25	1.36581e-16	3.07283	9.31809e-16	Gm26745	2770	gene_body	TRUE
chr5	123392600	123398599	228	114	4.54466e-24	2.10468	5.00156e-23	Mlxip	799	TSS	TRUE
chr5	124424200	124430199	228	99	5.88347e-32	2.42357	9.93505e-31	Sbno1	-1286	TSS	TRUE
chr5	124528000	124532399	226	111	8.0916e-25	2.1426	9.28972e-24	Gm43034	-933	TSS	TRUE
chr5	124536200	124542999	236	121	1.75452e-23	2.05249	1.8585e-22	Tmed2	-1095	TSS	TRUE
chr5	124583800	124585799	72	36	5.63459e-09	2.10468	1.98237e-08	Gtf2h3	5659	gene_body	TRUE
chr5	124858800	124864399	259	117	2.18596e-33	2.32953	3.96385e-32	Ccdc92	823	TSS	TRUE
chr5	125336800	125345799	394	193	7.17898e-42	2.1483	1.90378e-40	Scarb1	-206	TSS	TRUE
chr5	125389200	125394199	284	85	1.4175e-69	3.51605	9.33731e-68	Ubc	-1498	TSS	TRUE
chr5	125464600	125468199	219	74	4.21382e-46	3.11435	1.30869e-44	Gm43756	-5097	intergenic	TRUE
chr5	127240400	127243799	107	48	3.04298e-15	2.34584	1.88377e-14	Tmem132c	291	TSS	TRUE
chr5	129018000	129021799	178	83	3.13915e-22	2.25682	3.09721e-21	Ran	-169	TSS	TRUE
chr5	129500800	129507399	232	106	1.76062e-29	2.30323	2.62917e-28	Sfswap	2878	TSS	TRUE
chr5	129583000	129586399	108	46	7.95273e-17	2.47071	5.52959e-16	Mmp17	530	TSS	TRUE
chr5	129667600	129670599	91	46	1.34592e-10	2.0818	5.61661e-10	Zfp11	998	TSS	TRUE
chr5	129723200	129725999	122	52	1.0424e-18	2.46895	8.23927e-18	Gbas	-463	TSS	TRUE
chr5	129787000	129791399	305	79	1.08257e-88	4.06282	1.13765e-86	Gm23245	-339	TSS	TRUE
chr5	129941200	129943799	193	35	5.81206e-81	5.80289	5.23178e-79	Vkorc1l1	390	TSS	TRUE
chr5	130139800	130149199	421	219	8.11941e-39	2.02299	1.90153e-37	Kctd7	-361	TSS	TRUE
chr5	130220600	130224399	140	69	4.63904e-16	2.13518	3.05225e-15	Gm42469	564	TSS	TRUE
chr5	131306400	131308799	104	51	1.41177e-12	2.14594	7.07538e-12	Wbscr17	896	TSS	TRUE
chr5	134182600	134184799	162	56	1.25959e-33	3.04426	2.31658e-32	Gtf2ird2	-319	TSS	TRUE
chr5	134307800	134317199	305	138	8.59234e-39	2.32582	2.00657e-37	Gtf2i	2259	TSS	TRUE
chr5	134547800	134556199	333	172	1.08298e-31	2.03737	1.79785e-30	Gm42884	-57	TSS	TRUE
chr5	134570400	134575799	180	94	1.15629e-17	2.01511	8.55159e-17	Mir7228	1023	TSS	TRUE
chr5	134636600	134639799	130	68	2.84631e-13	2.01182	1.51343e-12	Eif4h	1289	TSS	TRUE
chr5	134682600	134689999	304	148	2.93058e-33	2.16156	5.2865e-32	Limk1	2297	TSS	TRUE
chr5	135004400	135013799	450	184	6.66796e-68	2.57365	4.24383e-66	Abhd11	-52	TSS	TRUE
chr5	135146200	135155399	416	183	5.10687e-55	2.3922	2.18532e-53	Tbl2	1142	TSS	TRUE
chr5	135167200	135173399	263	109	1.00647e-39	2.53913	2.45972e-38	Bcl7b	2016	TSS	TRUE
chr5	135186600	135190599	292	67	6.71769e-97	4.58631	8.16018e-95	Baz1b	1335	TSS	TRUE
chr5	135536200	135549199	994	317	1.70882e-217	3.29976	9.08447e-215	Hip1	2414	TSS	TRUE
chr5	136565200	136569199	207	57	6.88508e-57	3.82165	3.12372e-55	Cux1	63	TSS	TRUE
chr5	137029000	137049199	881	450	2.75192e-82	2.06024	2.55346e-80	Ap1s1	7034	TSS	TRUE
chr5	137284800	137317599	1343	694	1.12882e-120	2.03644	2.082e-118	Srrt	6473	TSS	TRUE
chr5	137329800	137335399	261	116	1.06575e-34	2.36776	2.07359e-33	Slc12a9	996	TSS	TRUE
chr5	137527800	137534199	384	156	5.78021e-59	2.59037	2.78164e-57	Gm17112	-1423	TSS	TRUE
chr5	137599600	137602799	348	71	3.98771e-129	5.15794	8.54013e-127	Mospd3	-156	TSS	TRUE
chr5	137627000	137634399	846	181	9.0392e-296	4.91866	9.49914e-293	Lrch4	1578	TSS	TRUE
chr5	137774600	137789399	842	358	3.1714e-116	2.47505	5.5119e-114	Ppp1r35	3095	TSS	TRUE
chr5	138083400	138085799	75	28	4.48707e-15	2.81876	2.74392e-14	Zkscan1	-484	TSS	TRUE
chr5	138115800	138118399	109	52	8.23557e-14	2.20586	4.57551e-13	Zscan21	183	TSS	TRUE
chr5	138194000	138197999	172	67	1.14085e-29	2.70152	1.719e-28	Mblac1	1685	TSS	TRUE
chr5	138438800	138446799	291	141	2.93358e-32	2.17185	5.01941e-31	Zfp157	1331	TSS	TRUE
chr5	138619200	138620999	153	26	2.23527e-68	6.1926	1.44296e-66	Zfp68	-339	TSS	TRUE
chr5	139195000	139197999	103	52	9.12897e-12	2.08444	4.26553e-11	Sun1	-4137	intergenic	TRUE
chr5	139198800	139213399	781	318	6.79447e-117	2.58451	1.20877e-114	Sun1	5462	TSS	TRUE
chr5	139250000	139253799	247	92	1.0687e-44	2.8253	3.15637e-43	Get4	-424	TSS	TRUE
chr5	139542800	139547999	169	72	4.22833e-25	2.47007	4.93848e-24	Uncx	1905	TSS	TRUE
chr5	139734200	139740399	325	145	2.48198e-42	2.35869	6.73203e-41	Micall2	-964	TSS	TRUE
chr5	140696000	140706399	511	247	3.20306e-55	2.1771	1.38375e-53	Iqce	1177	TSS	TRUE
chr5	140826000	140833799	396	143	1.08408e-73	2.91417	7.99146e-72	Gna12	530	TSS	TRUE
chr5	142629000	142631399	117	56	1.39779e-14	2.19863	8.23404e-14	Wipi2	657	TSS	TRUE
chr5	142893800	142913599	865	429	1.23507e-86	2.12185	1.23202e-84	Actb	3053	TSS	TRUE
chr5	143109600	143113799	168	80	3.07516e-20	2.20991	2.68367e-19	Rnf216	1293	TSS	TRUE
chr5	143399000	143408199	331	170	6.17619e-32	2.04896	1.04138e-30	Gm20635	147	TSS	TRUE
chr5	143620800	143623199	156	48	5.56392e-38	3.4201	1.25335e-36	Cyth3	-447	TSS	TRUE
chr5	143816200	143818599	219	27	3.78477e-123	8.53563	7.2163e-121	Eif2ak1	-388	TSS	TRUE
chr5	144014400	144016199	79	21	4.03737e-24	3.95879	4.46283e-23	Ccz1	-447	TSS	TRUE
chr5	145136000	145142599	304	143	9.24509e-36	2.23714	1.88992e-34	Pdap1	937	TSS	TRUE
chr5	145163800	145167999	175	77	1.90359e-24	2.39168	2.14245e-23	Ptcd1	1207	TSS	TRUE
chr5	146218600	146222999	161	64	5.14807e-27	2.64729	6.71568e-26	Rnf6	754	TSS	TRUE
chr5	146231000	146231999	47	22	2.73386e-07	2.24818	7.80846e-07	Cdk8	269	TSS	TRUE
chr5	146832000	146835199	139	70	2.94493e-15	2.08964	1.82796e-14	Rpl21	709	TSS	TRUE
chr5	146843600	146847599	172	87	3.23715e-18	2.08048	2.48227e-17	Rasl11a	528	TSS	TRUE
chr5	146948600	146951599	110	52	3.64093e-14	2.2261	2.07251e-13	Gtf3a	1442	TSS	TRUE
chr5	147073200	147078599	429	74	2.63105e-184	6.10071	1.10085e-181	Lnx2	685	TSS	TRUE
chr5	147185400	147189999	148	77	5.19691e-15	2.02267	3.16259e-14	Gsx1	-996	TSS	TRUE
chr5	147747800	147750399	81	42	3.63128e-09	2.02951	1.3037e-08	Gm43156	3583	gene_body	TRUE
chr5	147894200	147895999	153	28	3.0672e-64	5.75027	1.75001e-62	Slc46a3	-285	TSS	TRUE
chr5	148398800	148402399	138	65	2.28099e-17	2.23419	1.64772e-16	Slc7a1	-696	TSS	TRUE
chr5	148606800	148609999	84	43	1.10166e-09	2.05573	4.18685e-09	Gm29815	5243	intergenic	TRUE
chr5	149183600	149185599	104	43	4.1491e-17	2.54519	2.93917e-16	Hmgb1	-111	TSS	TRUE
chr5	149635600	149636999	154	32	1.17955e-57	5.06437	5.44448e-56	Hsph1	-129	TSS	TRUE
chr5	150445400	150447999	132	47	1.11845e-26	2.9555	1.43012e-25	Gm18753	-82	TSS	TRUE
chr5	150672000	150675399	105	46	1.22135e-15	2.40207	7.77332e-15	Pds5b	-39	TSS	TRUE
chr5	151367000	151369799	176	47	1.67486e-50	3.94067	6.12328e-49	1700028E10Rik	-318	TSS	TRUE
chr5	151649400	151652199	97	45	3.47682e-13	2.26837	1.83498e-12	Rfc3	441	TSS	TRUE
chr6	4746000	4749399	117	53	3.49836e-16	2.32308	2.32101e-15	Peg10	393	TSS	TRUE
chr6	6577600	6578799	60	14	1.52583e-21	4.51002	1.44306e-20	Shfm1	457	TSS	TRUE
chr6	6954800	6957199	81	24	8.27371e-22	3.55164	7.97169e-21	Sdhaf3	-4	TSS	TRUE
chr6	8208200	8210999	93	42	2.33169e-13	2.33018	1.24677e-12	Mios	377	TSS	TRUE
chr6	8258000	8260799	261	57	2.47086e-91	4.8186	2.71003e-89	Umad1	111	TSS	TRUE
chr6	8508400	8512599	311	69	1.294e-106	4.74314	1.83301e-104	A430035B10Rik	-70	TSS	TRUE
chr6	12748200	12749799	59	27	5.28616e-09	2.29955	1.86669e-08	Thsd7a	252	TSS	TRUE
chr6	13068200	13070799	80	35	1.95435e-12	2.40534	9.68559e-12	Tmem106b	-339	TSS	TRUE
chr6	13676800	13679799	171	62	5.55224e-33	2.90241	9.84286e-32	Bmt2	-334	TSS	TRUE
chr6	15720000	15722199	91	36	2.44028e-16	2.66008	1.63437e-15	Mdfic	438	TSS	TRUE
chr6	17064200	17066199	165	36	9.04507e-59	4.82321	4.31831e-57	Tes	50	TSS	TRUE
chr6	17692000	17695199	98	41	6.22943e-16	2.51534	4.0573e-15	St7	-347	TSS	TRUE
chr6	18848200	18848999	53	12	7.31381e-20	4.64782	6.24816e-19	Lsm8	-41	TSS	TRUE
chr6	21949200	21950999	74	22	4.84265e-20	3.53968	4.18173e-19	Ing3	528	TSS	TRUE
chr6	21985000	21987199	86	29	1.48358e-19	3.12073	1.23896e-18	Cped1	183	TSS	TRUE
chr6	22287800	22289999	96	43	6.31698e-14	2.3494	3.53479e-13	Wnt16	669	TSS	TRUE
chr6	23247200	23250599	107	48	3.04298e-15	2.34584	1.88377e-14	Fezf1	-538	TSS	TRUE
chr6	24663200	24665799	186	51	1.25273e-51	3.83794	4.70952e-50	Wasl	508	TSS	TRUE
chr6	28415600	28428799	570	281	1.07517e-58	2.13463	5.11957e-57	Arf5	-1360	TSS	TRUE
chr6	28450400	28452199	91	37	1.19238e-15	2.58818	7.60014e-15	Pax4	-1947	intergenic	TRUE
chr6	28475600	28482399	260	125	1.53283e-29	2.18886	2.29583e-28	Snd1	-1359	TSS	TRUE
chr6	29346400	29351799	289	99	6.93832e-59	3.07198	3.32128e-57	Calu	1030	TSS	TRUE
chr6	29607800	29612199	159	66	7.659e-25	2.53518	8.802e-24	Tnpo3	-113	TSS	TRUE
chr6	29691600	29696399	175	91	2.13471e-17	2.02373	1.54589e-16	Tspan33	-222	TSS	TRUE
chr6	29732200	29738599	200	86	8.19146e-29	2.4473	1.17734e-27	Smo	-294	TSS	TRUE
chr6	29766800	29769199	102	43	2.74595e-16	2.49624	1.83285e-15	Ahcyl2	-480	TSS	TRUE
chr6	30045400	30049199	126	58	9.31346e-17	2.28611	6.44102e-16	Nrf1	-688	TSS	TRUE
chr6	30159800	30163799	138	65	2.28099e-17	2.23419	1.64772e-16	Mir182	4191	intergenic	TRUE
chr6	30401200	30402399	63	20	4.36308e-16	3.31486	2.87425e-15	Klhdc10	-96	TSS	TRUE
chr6	30735400	30740999	190	90	7.47924e-23	2.2216	7.62572e-22	Gm27568	2235	TSS	TRUE
chr6	30895800	30899999	212	69	4.31307e-47	3.23327	1.39214e-45	4930412F09Rik	1000	TSS	TRUE
chr6	31215600	31221799	217	102	3.36467e-26	2.2388	4.1816e-25	Lncpint	-226	TSS	TRUE
chr6	33059400	33060599	194	23	2.30356e-112	8.87624	3.69125e-110	Chchd3	259	TSS	TRUE
chr6	34316600	34318999	102	41	1.32107e-17	2.61801	9.71779e-17	Akr1b3	-322	TSS	TRUE
chr6	34474200	34478999	334	110	1.40169e-71	3.19528	9.74454e-70	Bpgm	392	TSS	TRUE
chr6	34909800	34911199	102	37	1.43043e-20	2.90104	1.27328e-19	Wdr91	375	TSS	TRUE
chr6	35132600	35134599	115	39	3.40762e-25	3.10305	4.00165e-24	Cnot4	93	TSS	TRUE
chr6	35538800	35541199	127	36	1.15103e-34	3.71241	2.23614e-33	Mtpn	-112	TSS	TRUE
chr6	37297400	37300799	98	49	1.63324e-11	2.10468	7.45749e-11	Dgki	873	TSS	TRUE
chr6	37439800	37443599	269	80	1.43204e-66	3.53848	8.74473e-65	Creb3l2	445	TSS	TRUE
chr6	37870200	37871799	111	21	5.36233e-46	5.56236	1.65514e-44	Trim24	188	TSS	TRUE
chr6	38297800	38299799	108	31	2.11499e-29	3.66621	3.14796e-28	Zc3hav1l	458	TSS	TRUE
chr6	38351800	38355799	164	80	7.38776e-19	2.15729	5.90028e-18	Zc3hav1	472	TSS	TRUE
chr6	38432400	38434999	139	46	5.39335e-31	3.17989	8.71343e-30	Ubn2	-6833	intergenic	TRUE
chr6	38549600	38552599	185	51	4.84269e-51	3.8173	1.79076e-49	Luc7l2	-365	TSS	TRUE
chr6	39205200	39207599	97	31	2.32788e-23	3.2928	2.44833e-22	Kdm7a	388	TSS	TRUE
chr6	39557000	39558599	95	30	2.81781e-23	3.3324	2.95124e-22	Dennd2a	66	TSS	TRUE
chr6	39724000	39726599	103	50	1.00035e-12	2.16782	5.07764e-12	Braf	162	TSS	TRUE
chr6	39808000	39812999	181	92	7.3907e-19	2.07036	5.90055e-18	Mrps33	487	TSS	TRUE
chr6	39871200	39874399	147	77	1.06488e-14	2.00901	6.33278e-14	Tmem178b	-471	TSS	TRUE
chr6	40324200	40326799	106	41	2.40549e-19	2.72068	1.97995e-18	Agk	327	TSS	TRUE
chr6	40432800	40436599	124	62	4.88575e-14	2.10468	2.75696e-13	E330009J07Rik	1434	TSS	TRUE
chr6	40471200	40472199	65	21	3.58278e-16	3.25724	2.3751e-15	Ssbp1	347	TSS	TRUE
chr6	41541800	41543999	72	25	4.2806e-16	3.03073	2.82094e-15	Trbj2-2	-57	TSS	TRUE
chr6	42258600	42266399	283	126	2.63538e-37	2.36358	5.77535e-36	Tmem139	529	TSS	TRUE
chr6	42709000	42711599	99	42	1.05398e-15	2.48051	6.74365e-15	Tcaf1	-212	TSS	TRUE
chr6	43308200	43311199	95	49	1.56299e-10	2.04025	6.48862e-10	Nobox	-146	TSS	TRUE
chr6	43665800	43667399	73	24	1.69164e-17	3.20086	1.23413e-16	Tpk1	-322	TSS	TRUE
chr6	47451400	47455999	167	76	5.3466e-22	2.31237	5.20134e-21	A930035D04Rik	619	TSS	TRUE
chr6	47594000	47595999	159	28	7.07789e-69	5.97577	4.6219e-67	Ezh2	29	TSS	TRUE
chr6	47811600	47814799	162	57	8.79422e-33	2.99085	1.54477e-31	Pdia4	229	TSS	TRUE
chr6	47829000	47831599	85	43	5.1828e-10	2.0802	2.04265e-09	Zfp786	566	TSS	TRUE
chr6	47833000	47836599	171	62	5.55224e-33	2.90241	9.84286e-32	Zfp398	-895	TSS	TRUE
chr6	47876200	47882599	252	117	7.86548e-31	2.26657	1.25836e-29	Zfp282	2195	TSS	TRUE
chr6	48085000	48087599	92	44	6.48043e-12	2.20034	3.06877e-11	Zfp746	292	TSS	TRUE
chr6	48590400	48597999	331	150	8.96682e-42	2.32216	2.36678e-40	Repin1	316	TSS	TRUE
chr6	48600800	48602799	166	44	3.50746e-48	3.97018	1.17491e-46	Repin1	7916	gene_body	TRUE
chr6	49035600	49037999	114	49	2.27913e-17	2.4483	1.64743e-16	Gpnmb	122	TSS	TRUE
chr6	49212800	49216599	180	32	5.42612e-77	5.9194	4.31683e-75	Igf2bp3	256	TSS	TRUE
chr6	49217600	49220599	170	36	3.05188e-62	4.96937	1.63592e-60	Igf2bp3	-4143	intergenic	TRUE
chr6	49263200	49265599	144	63	1.03327e-20	2.40534	9.28446e-20	Tra2a	-367	TSS	TRUE
chr6	49822000	49823799	74	26	3.20756e-16	2.99511	2.13356e-15	Npy	189	TSS	TRUE
chr6	50108000	50111399	101	42	1.60976e-16	2.53062	1.09156e-15	Mpp6	-578	TSS	TRUE
chr6	50453400	50459799	319	139	1.63893e-43	2.41508	4.65786e-42	Osbpl3	-430	TSS	TRUE
chr6	50565800	50567799	117	48	3.16743e-19	2.56507	2.58848e-18	5430402O13Rik	156	TSS	TRUE
chr6	51468800	51476999	370	130	6.02211e-72	2.99511	4.23874e-70	Cbx3	2369	TSS	TRUE
chr6	51528000	51531199	82	43	4.80991e-09	2.00678	1.70718e-08	Snx10	5698	gene_body	TRUE
chr6	52009400	52013799	205	105	1.00883e-20	2.05456	9.07743e-20	Skap2	948	TSS	TRUE
chr6	52162400	52172999	395	200	5.92628e-39	2.07837	1.39332e-37	Hoxaas2	2025	TSS	TRUE
chr6	52174800	52177999	94	45	4.15311e-12	2.19822	1.99958e-11	5730596B20Rik	-1098	TSS	TRUE
chr6	52191800	52192999	57	12	1.19364e-22	4.9986	1.2068e-21	Hoxa4	-647	gene_body	TRUE
chr6	52202400	52207399	192	98	1.07892e-19	2.06172	9.10865e-19	Hoxa5	-313	TSS	TRUE
chr6	52208200	52222599	590	281	1.81702e-65	2.20953	1.0733e-63	Hoxa3	-2285	TSS	TRUE
chr6	52224000	52228199	167	75	1.47979e-22	2.3432	1.48828e-21	Hoxa9	4988	gene_body	TRUE
chr6	52229000	52235199	236	120	6.30061e-24	2.0696	6.89292e-23	Hoxa9	-1011	TSS	TRUE
chr6	52252000	52256799	148	63	2.75432e-22	2.47216	2.72794e-21	9530018H14Rik	3059	gene_body	TRUE
chr6	52639400	52640799	96	33	5.14359e-21	3.06135	4.70028e-20	Hibadh	288	TSS	TRUE
chr6	52713600	52714799	84	25	2.06174e-22	3.53585	2.06051e-21	Gm43966	-245	TSS	TRUE
chr6	54592800	54595999	128	48	5.0434e-24	2.80623	5.53897e-23	Plekha8	-711	TSS	TRUE
chr6	54815600	54819199	152	69	2.60158e-20	2.31819	2.27852e-19	Znrf2	483	TSS	TRUE
chr6	54969800	54973199	137	58	5.46276e-21	2.48569	4.98387e-20	Nod1	1111	TSS	TRUE
chr6	54989800	54993799	213	83	3.56181e-36	2.70058	7.44111e-35	Ggct	1149	TSS	TRUE
chr6	56711800	56717399	214	84	6.66134e-36	2.68096	1.37826e-34	Avl9	-327	TSS	TRUE
chr6	56796600	56798999	76	33	4.56804e-12	2.42357	2.18968e-11	Kbtbd2	12	TSS	TRUE
chr6	56923000	56926399	149	52	1.07568e-30	3.01535	1.70794e-29	Vmn1r4	677	TSS	TRUE
chr6	57533000	57539199	343	109	3.78575e-77	3.31148	3.02779e-75	Ppm1k	-674	TSS	TRUE
chr6	57690600	57693199	110	39	9.57633e-23	2.96813	9.71565e-22	Pyurf	177	TSS	TRUE
chr6	57824200	57825599	75	25	1.3366e-17	3.15701	9.82326e-17	Vopp1	235	TSS	TRUE
chr6	59207000	59211199	129	63	3.06609e-15	2.15479	1.89691e-14	Tigd2	229	TSS	TRUE
chr6	65778400	65779799	72	29	5.24348e-13	2.6127	2.72254e-12	Prdm5	111	TSS	TRUE
chr6	66535000	66539599	144	75	1.26433e-14	2.02049	7.47613e-14	Mad2l1	1909	TSS	TRUE
chr6	66896000	66897999	106	36	2.35866e-23	3.09855	2.47695e-22	4930597O21Rik	-479	TSS	TRUE
chr6	67036400	67039599	165	74	2.27465e-22	2.34643	2.26853e-21	Gadd45a	-594	TSS	TRUE
chr6	70791200	70795599	131	66	1.75163e-14	2.08873	1.02397e-13	Rpia	-1168	TSS	TRUE
chr6	70842400	70846199	629	67	0	9.87941	0	Eif2ak3	-215	TSS	TRUE
chr6	70956000	70957399	52	22	2.97604e-09	2.48734	1.07905e-08	Foxi3	168	TSS	TRUE
chr6	71269800	71272999	125	31	1.16319e-39	4.2433	2.8244e-38	Krcc1	-277	TSS	TRUE
chr6	71435400	71442199	285	85	3.99787e-70	3.52843	2.68234e-68	Rmnd5a	1836	TSS	TRUE
chr6	71493600	71495199	79	32	6.04212e-14	2.59796	3.38476e-13	Rnf103	505	TSS	TRUE
chr6	71542200	71544799	103	46	7.20654e-15	2.35632	4.34199e-14	Chmp3	-417	TSS	TRUE
chr6	71631600	71633599	193	37	4.22663e-77	5.48922	3.37443e-75	Kdm3a	389	TSS	TRUE
chr6	71781800	71783999	69	36	5.43966e-08	2.01698	1.70109e-07	Gm44769	-7768	gene_body	TRUE
chr6	71829200	71833999	214	80	8.06829e-39	2.815	1.89103e-37	Gm44771	109	TSS	TRUE
chr6	71869400	71871599	62	24	3.50759e-12	2.71854	1.69583e-11	Gm17825	-495	TSS	TRUE
chr6	71908400	71910199	80	38	9.36072e-11	2.21545	3.96171e-10	Polr1a	238	TSS	TRUE
chr6	72089800	72093999	105	52	1.97116e-12	2.12491	9.763e-12	Gm44604	-4046	intergenic	TRUE
chr6	72388000	72391599	135	67	2.44506e-15	2.12038	1.52765e-14	Vamp8	902	TSS	TRUE
chr6	72438000	72441999	256	115	2.19077e-33	2.34259	3.96859e-32	Mat2a	-442	TSS	TRUE
chr6	72613400	72617999	200	93	7.58214e-25	2.26309	8.71922e-24	Tgoln1	1299	TSS	TRUE
chr6	72786800	72791199	188	96	2.62012e-19	2.06083	2.1521e-18	Tcf7l1	253	TSS	TRUE
chr6	72953200	72961799	297	150	5.19766e-30	2.08363	7.98069e-29	Tmsb10	1247	TSS	TRUE
chr6	73221400	73223399	72	32	4.25811e-11	2.36776	1.86143e-10	Gm44362	-650	TSS	TRUE
chr6	73248000	73248999	49	21	1.16382e-08	2.45545	3.95613e-08	Suclg1	117	TSS	TRUE
chr6	81965000	81968599	101	50	4.82141e-12	2.12572	2.30831e-11	Mrpl19	-842	TSS	TRUE
chr6	82770800	82775599	234	114	4.54963e-26	2.16006	5.61717e-25	Hk2	1253	TSS	TRUE
chr6	83077000	83081199	257	108	6.30585e-38	2.50417	1.41554e-36	Pcgf1	753	TSS	TRUE
chr6	83101200	83104399	212	84	4.83643e-35	2.6559	9.56867e-34	Ccdc142	1198	TSS	TRUE
chr6	83105400	83109999	244	110	1.04406e-31	2.33428	1.73579e-30	Mrpl53	-1340	TSS	TRUE
chr6	83115200	83126399	594	256	1.20021e-80	2.44175	1.06972e-78	Wbp1	758	TSS	TRUE
chr6	83160400	83163399	155	60	3.12905e-27	2.71854	4.14285e-26	Dctn1	-4020	gene_body	TRUE
chr6	83313000	83317799	195	65	4.17355e-42	3.15701	1.11793e-40	Gm43890	1542	TSS	TRUE
chr6	83325000	83326999	93	25	1.24313e-27	3.9147	1.67736e-26	Mob1a	-16	TSS	TRUE
chr6	83831000	83833599	298	52	1.17468e-127	6.0307	2.44615e-125	Paip2b	-559	TSS	TRUE
chr6	83866800	83869199	116	49	3.60091e-18	2.49125	2.75163e-17	Zfp638	889	TSS	TRUE
chr6	85193000	85194799	79	39	6.68346e-10	2.13166	2.60333e-09	Emx1	6461	gene_body	TRUE
chr6	85437200	85455399	914	468	8.89826e-85	2.05521	8.6472e-83	Cct7	-5214	TSS	TRUE
chr6	85510400	85513999	162	60	2.2309e-30	2.84131	3.47621e-29	Egr4	1388	TSS	TRUE
chr6	85585600	85590799	190	83	1.04796e-26	2.40897	1.34227e-25	Alms1	668	TSS	TRUE
chr6	85960800	85961999	82	25	2.63186e-21	3.45167	2.45037e-20	Gm19265	-223	TSS	TRUE
chr6	86363800	86366999	152	71	3.14588e-19	2.25289	2.57203e-18	Fam136a	-246	TSS	TRUE
chr6	86404200	86405399	80	25	3.20412e-20	3.36748	2.79163e-19	Tia1	580	TSS	TRUE
chr6	86521000	86528599	354	135	1.12838e-60	2.75946	5.77456e-59	Pcbp1	1520	TSS	TRUE
chr6	86732400	86733999	139	45	6.36832e-32	3.25055	1.07257e-30	Gmcl1	182	TSS	TRUE
chr6	87005200	87008799	115	59	1.7766e-12	2.05117	8.83761e-12	Nfu1	-2236	intergenic	TRUE
chr6	87009600	87012799	121	51	6.23382e-19	2.49672	5.00523e-18	Nfu1	1963	gene_body	TRUE
chr6	87333800	87336599	99	47	7.56085e-13	2.21663	3.87699e-12	Gm44414	-340	TSS	TRUE
chr6	87838400	87839999	88	40	1.32413e-12	2.31514	6.64867e-12	Isy1	-402	TSS	TRUE
chr6	87850400	87853999	163	80	1.61154e-18	2.14414	1.25794e-17	Gm44064	990	TSS	TRUE
chr6	88042600	88045799	119	54	2.26722e-16	2.31904	1.52208e-15	Rab7	1069	TSS	TRUE
chr6	88083200	88085399	100	51	3.03265e-11	2.06341	1.34656e-10	Rpn1	-182	TSS	TRUE
chr6	88193000	88202599	461	151	1.39199e-98	3.21277	1.72806e-96	Gata2	3908	TSS	TRUE
chr6	88445600	88446799	101	26	2.97285e-31	4.08793	4.862e-30	Eefsec	338	TSS	TRUE
chr6	88464400	88467199	153	51	1.50945e-33	3.15701	2.76374e-32	Ruvbl1	390	TSS	TRUE
chr6	89642600	89647799	259	102	9.96885e-43	2.67211	2.73511e-41	Txnrd3	1211	TSS	TRUE
chr6	90368800	90371199	124	50	7.88301e-21	2.6098	7.1322e-20	Zxdc	505	TSS	TRUE
chr6	91514800	91517399	145	56	1.03303e-25	2.7248	1.2478e-24	Xpc	-212	TSS	TRUE
chr6	92089400	92094999	338	95	4.89096e-89	3.74411	5.17594e-87	Nr2c2	809	TSS	TRUE
chr6	92213800	92215799	101	46	4.09519e-14	2.31057	2.32275e-13	Rbsn	124	TSS	TRUE
chr6	94695000	94703999	361	188	1.64081e-33	2.02071	2.99818e-32	Lrig1	657	TSS	TRUE
chr6	95117400	95118399	119	6	2.74746e-111	20.8714	4.28111e-109	Kbtbd8	159	TSS	TRUE
chr6	97205000	97205999	64	13	5.95027e-26	5.18074	7.30853e-25	Uba3	59	TSS	TRUE
chr6	97207200	97212599	175	86	1.12577e-19	2.14138	9.48296e-19	Arl6ip5	-789	TSS	TRUE
chr6	97806200	97808599	90	43	1.01124e-11	2.20257	4.70532e-11	Mitf	341	TSS	TRUE
chr6	99484200	99486799	110	52	3.64093e-14	2.2261	2.07251e-13	Gm22328	-798	TSS	TRUE
chr6	99518600	99524199	255	78	5.35067e-61	3.44033	2.76011e-59	Foxp1	-403	TSS	TRUE
[truncated: 14,062 more rows]

## Sheet: ChIPvsDEG
Gene	NGcon_mean	OGDcon_mean	OGDpKD_mean	OGD_log2FC	padj	OGD_DEG	OGD&Prmt5KD_Log2FC	padj	Reversed	Rev_padj	PRMT5-Bound		Category	Gene#		Closest_TSS	fold_change	FDR_threshold	location_relative_to_TSS	region	PRMT5 Bound Genes
0610010F05Rik	2373.02	1056.06	1355.77	-1.14762	5.78479e-24	Dn	-0.799214	8.76799e-13	DN_reversed	0.00647924	TRUE		OGD-Up	2186		Gm37587	2.35097	2.858e-14	-3251	gene_body	TRUE
0610040B10Rik	18.384	55.074	24.7652	1.29867	0.000329691	Up	0.366669	0.41651	UP_reversed	0.00551133	FALSE		OGD-Dn	2926		Mrpl15	3.59549	2.25777e-21	138	TSS	TRUE
1110008P14Rik	971.743	1506.52	1068.59	0.616548	3.54534e-05	Up	0.139219	0.463411	UP_reversed	0.00448754	FALSE		PRMT5-bound OGD-Up	535		Tcea1	6.80512	3.21224e-46	385	TSS	TRUE
1110037F02Rik	4850.71	3242.89	4086.3	-0.572789	1.05359e-08		-0.245913	0.0221978	DN_reversed	0.0479515	TRUE		PRMT5-bound OGD-Dn	1066		Rb1cc1	2.12381	2.68168e-12	154	TSS	TRUE
1110038F14Rik	1365.66	1925.34	1248.74	0.49197	6.26149e-07		-0.124879	0.298476	UP_reversed	0.0020509	TRUE					Gm26901	10.9257	6.28597e-228	-899	TSS	TRUE
1190002N15Rik	3342.74	1195.54	2836.87	-1.46016	1.70024e-47	Dn	-0.235365	0.0309501	DN_reversed	2.12519e-23	TRUE		OGD-Up reversed	1035		Rrs1	2.43419	4.13359e-31	-708	TSS	TRUE
1500011B03Rik	53.6223	133.705	93.6937	1.20371	3.87615e-06	Up	0.732241	0.00679188	UP_reversed	0.0465046	FALSE		OGD-Dn reversed	2090		Mybl1	2.07962	3.13274e-09	-191	TSS	TRUE
1600002K03Rik	358.605	902.177	461.758	1.29859	3.43892e-20	Up	0.366077	0.0198839	UP_reversed	0.00407983	FALSE		PRMT5-bound OGD-up Rev	277		Snhg6	4.05902	8.3825e-17	-182	TSS	TRUE
1700020D05Rik	36.5274	127.314	61.7582	1.60119	1.62745e-08	Up	0.664235	0.0343174	UP_reversed	0.0467082	FALSE		PRMT5-bound OGD-Dn Rev	982		Tcf24	2.04511	1.16428e-10	-68	TSS	TRUE
1700020L24Rik	22.8609	61.2465	41.3678	1.13618	0.001885	Up	0.698824	0.0703553	UP_reversed	0.0472309	FALSE					Cspp1	3.03001	4.44104e-33	982	TSS	TRUE
1700066M21Rik	1135.05	497.443	818.412	-1.16803	8.02738e-24	Dn	-0.469665	3.12515e-05	DN_reversed	4.26467e-05	FALSE					Arfgef1	2.55568	1.06969e-13	-30	TSS	TRUE
1810011O10Rik	433.799	3029.12	2193.84	2.76329	6.11586e-152	Up	2.30665	6.54506e-107	UP_reversed	3.28068e-11	FALSE					Ncoa2	6.20325	7.17316e-97	1082	TSS	TRUE
1810037I17Rik	1706.19	2974.64	2143.93	0.789024	1.68567e-11	Up	0.326947	0.00958543	UP_reversed	0.00148559	TRUE					Lactb2	2.29259	1.22593e-08	145	TSS	TRUE
2010107E04Rik	2363.12	3406.04	2389.28	0.521002	4.66151e-07		0.0182245	0.912799	UP_reversed	0.00115407	FALSE					Terf1	4.95476	1.07764e-40	153	TSS	TRUE
2200002D01Rik	178.938	381.078	218.992	1.0628	1.16769e-09	Up	0.296491	0.146851	UP_reversed	0.000330077	FALSE					Rpl7	3.01773	4.10615e-38	-38	TSS	TRUE
2210016L21Rik	1108.95	1692.72	908.809	0.603495	1.10555e-10	Up	-0.285276	0.00446027	UP_reversed	1.40354e-08	FALSE					Gm38342	2.31514	1.24344e-10	339	TSS	TRUE
2310039H08Rik	692.219	1089.85	618.565	0.643492	6.02878e-06	Up	-0.152423	0.393471	UP_reversed	0.000528368	FALSE					Tceb1	2.40534	9.61982e-14	383	TSS	TRUE
2410006H16Rik	2802.57	19913	18271.2	2.78744	1.69683e-160	Up	2.66555	3.45776e-147	UP_reversed	0.00236558	FALSE					Tmem70	2.08129	8.64654e-10	489	TSS	TRUE
2610002M06Rik	1397.67	827.568	1173.01	-0.745751	1.38248e-13	Dn	-0.251073	0.0162801	DN_reversed	0.0140587	FALSE					Mcm3	8.33775	7.9052e-57	211	TSS	TRUE
2610021A01Rik	1493.56	728.307	1228.36	-1.01461	4.14095e-15	Dn	-0.281342	0.0439793	DN_reversed	9.69839e-05	FALSE					Gm6420	3.78273	1.16729e-35	-593	TSS	TRUE
2610306O10Rik	19.2059	111.036	20.2624	2.08517	1.06795e-09	Up	0.0318138	0.958443	UP_reversed	0.0324024	FALSE					B3gat2	2.01447	2.60995e-07	873	gene_body	TRUE
2610507B11Rik	20051.3	7087.62	10240.9	-1.48342	2.65882e-60	Dn	-0.959473	3.88121e-26	DN_reversed	0.00602143	FALSE					Sdhaf4	3.40757	6.62677e-17	-544	TSS	TRUE
2700038G22Rik	1820.88	2565.51	1358.01	0.48836	7.62424e-07		-0.417454	3.14878e-05	UP_reversed	0.000142714	TRUE					Fam135a	2.15864	1.22283e-09	1093	TSS	TRUE
2700060E02Rik	2791.29	3603.79	3023.53	0.365437	1.76776e-05		0.114076	0.255892	UP_reversed	0.00519223	TRUE					Lmbrd1	2.91147	2.2233e-16	-326	TSS	TRUE
2810004N23Rik	3157.1	2409.44	2633.27	-0.386963	4.44874e-06		-0.261178	0.00222658	DN_reversed	0.0467707	FALSE					Ptp4a1	3.20712	7.5973e-15	69	TSS	TRUE
2810025M15Rik	1334.5	2131.01	1486.25	0.663593	5.45918e-09	Up	0.155565	0.259157	UP_reversed	0.0406128	TRUE					Rab23	3.21891	4.12285e-23	1404	TSS	TRUE
2810405F17Rik	63.251	139.57	94.7607	1.05075	3.16533e-05	Up	0.540554	0.045857	UP_reversed	0.0274842	TRUE					Zfp451	3.01351	1.73612e-13	326	TSS	TRUE
2810417H13Rik	6813.9	3461.93	3628.16	-0.969748	5.05873e-37	Dn	-0.902848	2.64629e-33	DN_reversed	0.000216844	TRUE					Imp4	5.42183	5.93865e-91	-251	TSS	TRUE
2900052L18Rik	191.047	433.358	425.797	1.13808	1.08897e-11	Up	1.11135	1.10003e-11	UP_reversed	0.00486723	FALSE					Uggt1	2.76726	2.95401e-13	304	TSS	TRUE
2900093K20Rik	116.717	615.976	347.983	2.32527	7.79055e-45	Up	1.53295	5.64484e-20	UP_reversed	0.000111894	FALSE					Arid5a	2.14905	4.79699e-35	145	TSS	TRUE
2900097C17Rik	93.6811	32.9416	69.7818	-1.27424	5.62739e-05	Dn	-0.380414	0.265834	DN_reversed	0.0276833	FALSE					Kansl3	2.31138	6.56733e-16	1080	TSS	TRUE
3830403N18Rik	2861.84	1878.09	2790.02	-0.602168	8.40132e-12	Dn	-0.0379862	0.768634	DN_reversed	6.11379e-05	FALSE					Lman2l	3.34835	1.46496e-24	-229	TSS	TRUE
4833420G17Rik	1202.07	1809.58	1648.24	0.580015	4.63598e-09		0.449328	5.64389e-06	UP_reversed	0.0344776	TRUE					Cnnm3	3.88276	3.90633e-58	-567	TSS	TRUE
4930503L19Rik	2256.69	1296.04	2805.07	-0.785422	3.36313e-12	Dn	0.305556	0.00959446	DN_reversed	1.36606e-07	FALSE					Ankrd39	4.54418	1.23038e-61	418	TSS	TRUE
4930517L18Rik	71.1703	205.531	88.5293	1.41125	2.8617e-09	Up	0.297718	0.320919	UP_reversed	0.0286734	FALSE					Sema4c	2.08725	8.51865e-57	2048	TSS	TRUE
4930523C07Rik	79.4771	342.996	319.258	2.00646	4.96126e-28	Up	1.9129	1.04424e-26	UP_reversed	0.00329994	FALSE					Cox5b	2.9344	1.27437e-27	-384	TSS	TRUE
4930550L24Rik	5441.82	3188.3	3910.93	-0.764536	2.69294e-18	Dn	-0.47067	9.67148e-08	DN_reversed	3.16991e-05	FALSE					Actr1b	2.45903	1.05567e-31	6821	gene_body	TRUE
4931406P16Rik	1652.55	861.354	1756.64	-0.908832	2.33209e-09	Dn	0.0835041	0.698887	DN_reversed	3.53456e-07	FALSE					Tmem131	5.65631	3.35528e-52	-278	TSS	TRUE
4932438A13Rik	2977.71	1345.09	2424.32	-1.11459	2.27903e-15	Dn	-0.291239	0.0642108	DN_reversed	0.00333585	TRUE					Inpp4a	2.23353	7.47241e-13	1208	TSS	TRUE
5031425E22Rik	779.309	1016.13	842.133	0.377868	0.000725237		0.113496	0.397414	UP_reversed	0.0433424	FALSE					Unc50	3.44641	2.38641e-31	129	TSS	TRUE
5430416N02Rik	552.202	419.677	520.013	-0.38237	0.0487037		-0.0897351	0.714708	DN_reversed	0.0366503	FALSE					Tsga10	4.80298	3.3681e-61	-21	TSS	TRUE
5930409G06Rik	955.463	292.318	566.522	-1.63605	7.64842e-21	Dn	-0.73561	2.07168e-05	DN_reversed	0.0010459	FALSE					Lipt1	4.93283	1.58697e-27	-106	TSS	TRUE
6430511E19Rik	304.775	71.6928	144.791	-1.82984	7.62972e-11	Dn	-0.987098	0.0003812	DN_reversed	0.0350989	FALSE					Txndc9	2.17045	5.74439e-15	-85	TSS	TRUE
6720489N17Rik	494.873	197.661	434.472	-1.29075	5.33044e-16	Dn	-0.189047	0.289191	DN_reversed	7.91056e-05	FALSE					Pdcl3	2.6149	8.98227e-14	2291	gene_body	TRUE
8430408G22Rik	38.8791	85.6361	29.6413	0.956265	0.00882912	Up	-0.341739	0.447186	UP_reversed	0.0286253	FALSE					Rpl31	2.71392	8.73324e-25	1757	TSS	TRUE
9130024F11Rik	96.4016	26.7913	62.3664	-1.5264	6.28008e-07	Dn	-0.564556	0.0613302	DN_reversed	0.00680368	TRUE					Tbc1d8	2.23902	1.7552e-12	-245	TSS	TRUE
9430020K01Rik	3104.33	2361.99	4209.9	-0.387604	0.00141706		0.430922	0.000241759	DN_reversed	0.00176095	TRUE					Cnot11	2.64434	2.05265e-16	107	TSS	TRUE
9530077C05Rik	121.988	325.523	155.089	1.34793	9.64149e-14	Up	0.3261	0.129171	UP_reversed	8.31597e-06	TRUE					Rnf149	3.30735	7.29781e-16	204	TSS	TRUE
9930021J03Rik	1704.54	753.345	2175.84	-1.14903	1.67037e-18	Dn	0.343346	0.0123011	DN_reversed	8.13422e-09	TRUE					Mfsd9	3.34835	5.65624e-17	586	TSS	TRUE
A230046K03Rik	4642.68	2026.99	3866.81	-1.1731	1.25629e-23	Dn	-0.261263	0.0452767	DN_reversed	6.525e-05	TRUE					Pou3f3	3.35189	1.79918e-20	-368	TSS	TRUE
A430005L14Rik	423.159	704.661	565.908	0.720374	1.15779e-07	Up	0.417908	0.00290099	UP_reversed	0.00816432	TRUE					Mrps9	2.49554	6.72729e-13	466	TSS	TRUE
A830080D01Rik	1402	1053.1	2506.37	-0.400394	0.0116612		0.813284	1.38152e-08	DN_reversed	0.0126001	TRUE					8430432A02Rik	2.4993	5.48508e-12	-388	TSS	TRUE
A930004J17Rik	220.141	80.167	135.423	-1.30047	3.02692e-06	Dn	-0.653401	0.0212097	DN_reversed	0.0466413	FALSE					Tgfbrap1	3.07606	1.22099e-23	21	TSS	TRUE
AA474408	115.972	374.972	170.88	1.59398	2.81091e-15	Up	0.503591	0.0261564	UP_reversed	0.0449662	FALSE					Uxs1	3.70949	7.94564e-37	-100	TSS	TRUE
Aars2	1210.75	1475.98	1123.61	0.282165	0.0123606		-0.105659	0.426691	UP_reversed	0.038932	FALSE					Tpp2	4.34089	2.57386e-41	284	TSS	TRUE
Aasdhppt	1876.82	1390.93	1755.97	-0.429501	5.56164e-06		-0.0972969	0.395817	DN_reversed	0.00172788	TRUE					Tex30	4.39506	2.2533e-23	-262	TSS	TRUE
Abcb10	3517.82	1359.72	1811.98	-1.35514	4.29373e-51	Dn	-0.949228	1.64801e-27	DN_reversed	0.00745839	FALSE					Bivm	2.18775	8.686e-10	437	TSS	TRUE
Abcb6	565.959	1269.47	1133.7	1.14345	4.27442e-26	Up	0.987604	2.25884e-20	UP_reversed	9.34615e-07	FALSE					Ercc5	3.07283	9.31809e-16	-147	TSS	TRUE
Abcb7	1978.67	938.013	1344.34	-1.06155	4.27955e-25	Dn	-0.555397	3.42476e-08	DN_reversed	0.00949963	FALSE					Gulp1	3.06681	3.00577e-21	-11	TSS	TRUE
Abcd4	857.875	1134.44	855.653	0.396445	0.000493892		-2.11434e-06	1	UP_reversed	0.00181426	FALSE					Wdr75	3.85857	6.6113e-22	433	TSS	TRUE
Abce1	16156.7	9897.68	14071.9	-0.701936	4.95211e-21	Dn	-0.198501	0.0150106	DN_reversed	9.45407e-09	FALSE					Gm28151	2.70601	5.65678e-13	-3321	gene_body	TRUE
Abhd10	607.271	881	646.294	0.519294	6.70535e-05		0.08115	0.647382	UP_reversed	0.0144686	FALSE					Nabp1	5.04503	6.07044e-59	-601	TSS	TRUE
Abhd17b	1734.45	1085.43	1919.34	-0.668461	1.09763e-12	Dn	0.143115	0.17613	DN_reversed	6.93602e-09	FALSE					Myo1b	4.0515	4.05753e-23	370	TSS	TRUE
Abhd17c	2811.24	1643.04	2420.88	-0.763681	2.31072e-17	Dn	-0.212093	0.0287352	DN_reversed	5.53697e-08	FALSE					Stat1	2.9094	2.68445e-18	44	TSS	TRUE
Abhd4	2088.35	2873.76	2798.25	0.456826	2.5145e-07		0.419728	1.71331e-06	UP_reversed	0.00490224	TRUE					Gls	9.32754	1.42377e-227	622	TSS	TRUE
Abi1	5039.45	4059.28	6778	-0.311021	5.34467e-05		0.423836	7.28777e-09	DN_reversed	0.000171559	FALSE					Nemp2	2.91417	1.83259e-14	396	TSS	TRUE
Abi2	1914.01	1227.28	2104.62	-0.630299	3.77602e-09	Dn	0.131563	0.301389	DN_reversed	8.50865e-06	FALSE					Inpp1	2.04025	6.48862e-10	787	TSS	TRUE
Abl1	8319.9	4159.14	5091.39	-0.993802	1.10277e-45	Dn	-0.704218	2.65314e-24	DN_reversed	0.0156692	TRUE					Hibch	2.05071	2.33409e-08	86	TSS	TRUE
Abtb1	238.025	630.974	460.349	1.35978	3.05355e-19	Up	0.9279	1.22529e-09	UP_reversed	0.000152501	FALSE					Ormdl1	3.9755	2.14436e-29	304	TSS	TRUE
AC125099.1	23.2859	80.1447	63.8922	1.5275	6.79546e-07	Up	1.24925	4.38112e-05	UP_reversed	0.0447444	FALSE					Asnsd1	2.61387	4.95566e-13	66	TSS	TRUE
Acad9	4264.72	1725.42	2196.76	-1.29171	1.86362e-50	Dn	-0.950788	1.64951e-29	DN_reversed	0.0198295	FALSE					Gtf3c3	4.13919	1.44512e-18	270	TSS	TRUE
Acadl	4073.86	5399.75	4639.63	0.403422	4.95943e-07		0.187362	0.0305556	UP_reversed	0.00379729	FALSE					Sf3b1	2.65277	5.79983e-20	780	TSS	TRUE
Acadsb	2376.58	825.955	1247.14	-1.49126	6.37893e-38	Dn	-0.918929	3.72383e-16	DN_reversed	0.0119424	TRUE					E330011M16Rik	2.2893	8.86146e-30	-1188	TSS	TRUE
Acap2	5708.87	3543.98	6481.34	-0.676419	9.64971e-10	Dn	0.17953	0.162853	DN_reversed	0.000776331	TRUE					Hspd1	2.69661	8.29824e-21	623	TSS	TRUE
Acap3	2900.2	2286.63	2686.81	-0.3362	0.00116476		-0.109161	0.374489	DN_reversed	0.00425496	FALSE					Mob4	4.4522	9.02306e-19	68	TSS	TRUE
Acbd5	1750.93	992.092	1947.12	-0.807213	1.06056e-11	Dn	0.146827	0.301711	DN_reversed	0.000490519	TRUE					Mars2	6.31403	4.0146e-74	722	TSS	TRUE
Accs	245.033	360.81	243.949	0.530768	0.00163242		-0.00951409	0.971417	UP_reversed	0.0174927	FALSE					9130024F11Rik	3.61741	8.79594e-55	19	TSS	TRUE
Ackr3	2626.41	5782.23	5348.9	1.12715	1.52861e-42	Up	1.01707	2.55022e-35	UP_reversed	0.00116301	FALSE					Gm4081	2.24194	2.68243e-12	396	TSS	TRUE
Acot13	1519.85	2778.82	1774.96	0.853164	5.21497e-12	Up	0.221462	0.12379	UP_reversed	0.0356477	FALSE					Tyw5	3.62472	3.12799e-24	300	TSS	TRUE
Acot2	217.964	467.088	417.433	1.06202	2.21803e-10	Up	0.903402	4.99112e-08	UP_reversed	0.035563	FALSE					Sgol2a	2.38909	4.25475e-12	728	TSS	TRUE
Acot7	4323.14	5388.33	4265.57	0.313661	0.0019873		-0.0182553	0.906773	UP_reversed	0.0387586	TRUE					Aox1	2.16884	1.1637e-18	268	TSS	TRUE
Acsl4	8055.04	3001.11	5681.77	-1.40603	7.42605e-51	Dn	-0.499056	1.75569e-07	DN_reversed	3.03719e-08	TRUE					Clk1	3.72366	9.05001e-25	465	TSS	TRUE
Acta2	4658.48	492.913	222.566	-3.1741	6.45227e-167	Dn	-4.31936	5.68387e-291	DN_reversed	2.5915e-07	FALSE					Orc2	8.7425	3.23827e-121	108	TSS	TRUE
Actr1b	8463.98	5496.65	5564.21	-0.618724	2.57233e-17	Dn	-0.60058	1.04803e-16	DN_reversed	0.0136931	TRUE					Fam126b	2.23622	5.08716e-09	222	TSS	TRUE
Actr2	12869.3	7767.87	10905.3	-0.722545	2.40527e-18	Dn	-0.237505	0.00780062	DN_reversed	0.00236558	TRUE					Gm20257	2.00349	7.22206e-10	-1041	TSS	TRUE
Actr3	9246.18	7257.6	10576.7	-0.348069	8.64344e-07		0.192371	0.00931295	DN_reversed	1.09186e-05	TRUE					Cflar	2.41593	2.52889e-22	1239	TSS	TRUE
Actr5	800.702	1726.34	1107.76	1.09062	7.4907e-29	Up	0.457188	6.82608e-06	UP_reversed	0.000497995	TRUE					Casp8	4.20935	2.45562e-20	-274	TSS	TRUE
Acvr2a	945.984	751.524	1276.02	-0.325394	0.00520207		0.423583	5.7643e-05	DN_reversed	0.00837476	FALSE					Stradb	2.74678	2.18387e-26	1477	TSS	TRUE
Acy3	211.486	299.257	192.157	0.477758	0.00906917		-0.138607	0.542843	UP_reversed	0.0190689	FALSE					G730003C15Rik	4.20935	1.21311e-22	66	TSS	TRUE
Adam10	5031.14	1175.53	2580.37	-2.07498	1.37501e-128	Dn	-0.956908	1.06781e-31	DN_reversed	2.58743e-13	TRUE					Als2	2.15251	1.42955e-10	-569	TSS	TRUE
Adam9	9067.88	3265.19	3933.87	-1.46233	6.94534e-86	Dn	-1.19767	2.32736e-60	DN_reversed	0.00516287	FALSE					Fzd7	3.30558	9.22702e-59	1175	TSS	TRUE
Adamts1	5355.69	3683.35	3351.66	-0.534215	6.81278e-10		-0.671625	2.35549e-15	DN_reversed	7.78852e-08	TRUE					Nop58	2.6098	7.1322e-20	90	TSS	TRUE
Adamts5	7759.31	660.592	638.483	-3.49121	2.62328e-213	Dn	-3.55155	1.31591e-235	DN_reversed	1.16279e-09	TRUE					Bmpr2	3.184	1.33736e-25	199	TSS	TRUE
Adar	2629.5	1932.52	3098.73	-0.436183	8.80019e-05		0.23229	0.0479658	DN_reversed	0.000432799	FALSE					Fam117b	2.17578	3.63109e-17	193	TSS	TRUE
Adarb1	1268.44	822.865	1228.83	-0.610491	1.06447e-08	Dn	-0.0460048	0.760634	DN_reversed	4.79107e-05	FALSE					Wdr12	2.14096	3.47932e-13	707	TSS	TRUE
Adcy6	3641.26	2683.85	4678.7	-0.435166	4.25147e-07		0.357814	2.40196e-05	DN_reversed	2.58322e-06	FALSE					Nbeal1	3.23796	2.47084e-18	-299	TSS	TRUE
Add3	3822.58	1989.28	2803.69	-0.932883	1.09617e-25	Dn	-0.443302	7.26907e-07	DN_reversed	0.0280996	TRUE					Cyp20a1	2.42038	2.17623e-13	-323	TSS	TRUE
Adgra3	5344.24	3056.3	4312.88	-0.800132	2.18671e-27	Dn	-0.308262	4.29676e-05	DN_reversed	0.000556691	FALSE					Raph1	4.26197	1.43198e-25	78	TSS	TRUE
Adgrl1	3188.65	2045.06	2066.58	-0.634007	2.3504e-14	Dn	-0.619313	2.46823e-14	DN_reversed	0.0152625	FALSE					Nrp2	2.15729	5.90028e-18	-2085	TSS	TRUE
Adgrl2	10027.7	2566.51	4005.31	-1.9459	5.05585e-112	Dn	-1.31223	7.73301e-54	DN_reversed	7.86951e-18	FALSE					Nrp2	2.81339	1.41896e-23	3514	gene_body	TRUE
Adh7	3492.86	1808.49	2785.88	-0.941994	7.20141e-32	Dn	-0.325475	5.87419e-05	DN_reversed	0.000591909	FALSE					Gm29083	2.60161	1.11465e-14	-6227	gene_body	TRUE
Ado	3118.19	2696.94	3399.47	-0.207443	0.0165282		0.124757	0.170622	DN_reversed	0.0280692	FALSE					Eef1b2	2.14515	4.60142e-12	374	TSS	TRUE
Adprhl2	1408.26	2192.59	1491.11	0.633183	2.60313e-13	Up	0.0848021	0.455454	UP_reversed	2.43828e-05	FALSE					Klf7	3.71413	1.17127e-31	190	TSS	TRUE
Adss	6465.69	5644.95	8218.08	-0.195129	0.00675242		0.34373	2.21131e-07	DN_reversed	0.0165266	TRUE					Creb1	5.67093	8.60643e-40	280	TSS	TRUE
Aebp2	4553.2	3742.17	6519.08	-0.280178	0.000259253		0.515338	4.82372e-13	DN_reversed	0.000901262	TRUE					Mettl21a	2.32917	3.44354e-21	41	TSS	TRUE
Aen	6863.88	4848.26	5545.89	-0.496603	2.55832e-09		-0.303827	0.000381664	DN_reversed	0.0137725	TRUE					2810408I11Rik	3.7071	2.78678e-40	58	TSS	TRUE
Afdn	10756.4	7579.56	10433	-0.499369	9.27373e-08		-0.0442519	0.746439	DN_reversed	5.58177e-05	FALSE					Gm38058	2.55862	9.69618e-37	659	TSS	TRUE
Aff4	13046.6	8207.19	13042.6	-0.659049	4.76223e-10	Dn	-0.000914682	0.996485	DN_reversed	0.000514474	FALSE					Plekhm3	3.90868	1.29876e-15	223	TSS	TRUE
Afg3l2	4422.75	2999.1	3753.15	-0.55573	3.11947e-14		-0.235811	0.00188582	DN_reversed	0.000745035	TRUE					Idh1	2.95657	2.03089e-12	7778	gene_body	TRUE
Agfg1	4189.34	3455.95	5995.79	-0.27471	0.000194021		0.514052	4.85953e-14	DN_reversed	0.00092073	TRUE					Idh1	3.06416	1.19147e-20	178	TSS	TRUE
Ago2	10999.3	7138.08	11710.6	-0.611008	1.51041e-06	Dn	0.0881755	0.612861	DN_reversed	1.17341e-05	FALSE					Rpe	9.55873	9.23735e-66	-31	TSS	TRUE
Agps	5267.94	2612.6	4493.47	-1.00131	6.82993e-29	Dn	-0.228694	0.0191378	DN_reversed	4.11773e-07	TRUE					Kansl1l	8.22737	2.52999e-47	645	TSS	TRUE
Agrn	5329.49	2929.16	2936.43	-0.856779	5.97073e-27	Dn	-0.853976	1.07065e-27	DN_reversed	0.0157038	TRUE					Lancl1	4.0966	2.38053e-32	871	TSS	TRUE
Agtpbp1	1785.16	1343.36	1645.72	-0.404604	1.88939e-05		-0.117507	0.283374	DN_reversed	0.0105864	FALSE					Bard1	2.66897	2.19661e-28	-654	TSS	TRUE
Ahctf1	12783.4	8690.42	14285.8	-0.55029	8.44022e-09		0.157931	0.154912	DN_reversed	4.46714e-08	TRUE					Atic	3.26976	4.90084e-20	349	TSS	TRUE
Ahcyl1	18144.6	8945.63	10979.7	-1.01437	6.74916e-51	Dn	-0.720927	1.13691e-26	DN_reversed	3.46427e-08	FALSE					Apol7d	4.57767	2.09834e-29	-35	TSS	TRUE
Ahcyl2	1878.93	1464.5	2164.7	-0.352379	0.000421026		0.201457	0.0509443	DN_reversed	0.000749858	TRUE					Gm4319	2.1836	3.6793e-10	-799	TSS	TRUE
Ahdc1	910.206	692.372	800.499	-0.385988	0.000776259		-0.179434	0.141265	DN_reversed	0.00182285	TRUE					Gm23472	2.37625	2.82131e-10	-1346	intergenic	TRUE
Ahnak2	2424.46	3798.35	2560.39	0.640534	2.82433e-12	Up	0.0788957	0.523291	UP_reversed	2.47757e-10	TRUE					Gm24497	3.0647	1.94456e-33	486	TSS	TRUE
AI314180	16854.2	12466	14741.9	-0.431611	1.0139e-07		-0.191961	0.0290797	DN_reversed	0.0054979	FALSE					Tmem169	2.86236	2.05379e-13	430	TSS	TRUE
AI413582	696.096	1127.14	566.345	0.683503	8.52204e-08	Up	-0.282377	0.0467255	UP_reversed	1.41572e-06	FALSE					Rpl37a	3.29427	4.71967e-17	309	TSS	TRUE
AI837181	1883.21	2760.37	2008.18	0.54567	3.02864e-08		0.0935845	0.46462	UP_reversed	9.74059e-05	FALSE					Arpc2	2.63084	1.30623e-13	802	TSS	TRUE
Aif1l	2308.25	1410.61	1580.64	-0.700381	2.20207e-12	Dn	-0.536446	5.11756e-08	DN_reversed	0.0207338	FALSE					Gm28364	2.39075	8.32974e-60	1238	TSS	TRUE
Aip	2823.01	5712.22	4312.57	1.00364	5.3196e-24	Up	0.604863	2.26638e-09	UP_reversed	0.00305662	FALSE					Ctdsp1	2.21406	1.15789e-63	-3909	TSS	TRUE
Ajuba	5426.47	3455.54	3858.28	-0.644939	4.02415e-16	Dn	-0.486688	6.94738e-10	DN_reversed	0.000160859	TRUE					Mir26b	2.60579	6.65337e-17	3789	gene_body	TRUE
AK157302	272.144	155.072	235.093	-0.789175	2.25645e-05	Dn	-0.211946	0.304812	DN_reversed	0.0102261	FALSE					Vil1	2.02951	1.3037e-08	6223	gene_body	TRUE
Ak3	2511.85	1447.62	2066.03	-0.787647	9.31042e-16	Dn	-0.281288	0.00611511	DN_reversed	0.0114587	FALSE					Cnot9	2.95846	1.11444e-28	-58	TSS	TRUE
Ak3l2-ps	649.775	213.676	516.386	-1.56372	1.51839e-23	Dn	-0.328827	0.0382083	DN_reversed	1.11683e-10	FALSE					Ttll4	2.81876	2.74392e-14	754	TSS	TRUE
Ak4	7912.69	4757.95	6747.87	-0.728831	3.85484e-20	Dn	-0.227634	0.00746593	DN_reversed	2.77443e-11	FALSE					Wnt10a	3.01351	1.73612e-13	283	TSS	TRUE
Akap1	6595.52	3843.54	5255.29	-0.771671	2.05174e-21	Dn	-0.325458	0.000102558	DN_reversed	5.70111e-07	TRUE					Wnt10a	2.13563	2.2205e-08	2883	gene_body	TRUE
Akap11	3368.25	1313.37	2174.89	-1.33002	1.07082e-24	Dn	-0.620572	2.40733e-06	DN_reversed	0.000163001	FALSE					Ihh	2.05456	2.1614e-23	3971	gene_body	TRUE
Akap2	14006.4	10957	18220.2	-0.350954	6.85868e-05		0.375562	1.52312e-05	DN_reversed	0.000175511	FALSE					Nhej1_v2	3.41212	1.31913e-25	499	TSS	TRUE
Akap8	7515.17	6060.48	6830.35	-0.308395	1.15775e-05		-0.136983	0.0744929	DN_reversed	9.85411e-05	TRUE					Nhej1_v2	2.05292	3.73085e-12	-3300	gene_body	TRUE
Akap8l	1304.44	2519.13	1836.05	0.938648	5.7801e-29	Up	0.488777	1.13516e-08	UP_reversed	0.00563569	TRUE					Cnppd1	3.63933	4.69315e-42	337	TSS	TRUE
Akr1b10	264.999	822.251	646.755	1.59854	5.8823e-32	Up	1.26252	9.0216e-21	UP_reversed	0.00229167	FALSE					Ankzf1	2.83487	2.41897e-46	-1760	TSS	TRUE
Akr1b8	3832.4	4989.35	4297.27	0.376047	8.87313e-05		0.164195	0.125034	UP_reversed	0.00995875	FALSE					Stk16	2.09064	2.11421e-15	1361	TSS	TRUE
Akr1c14	574.067	355.319	395.25	-0.685173	2.66573e-06	Dn	-0.527276	0.000190081	DN_reversed	3.66609e-05	FALSE					Dnajb2	2.0316	1.35038e-13	1593	TSS	TRUE
Akt1	19441.7	10156.2	10849.6	-0.929302	7.05416e-34	Dn	-0.834394	8.07055e-28	DN_reversed	0.021925	FALSE					Gm28294	2.07246	4.44487e-19	1077	TSS	TRUE
Akt2	2921.57	2035.82	2402.91	-0.513511	2.97114e-09		-0.277708	0.00171669	DN_reversed	0.042204	TRUE					Dnpep	4.15478	1.98478e-154	2058	TSS	TRUE
Akt2-ps	777.868	380.893	591.557	-1.00994	3.27561e-17	Dn	-0.390721	0.000757761	DN_reversed	0.000550532	FALSE					Asic4	3.24987	1.28388e-23	8663	gene_body	TRUE
Alad	5423.2	7231.37	4427.68	0.410299	1.47774e-05		-0.28827	0.00327317	UP_reversed	0.0313859	FALSE					Chpf	2.31881	7.55317e-46	3306	TSS	TRUE
Alas1	855.103	1928.79	2017.77	1.16031	8.98046e-38	Up	1.22589	6.90539e-44	UP_reversed	0.0456454	FALSE					Stk11ip	2.46039	1.80462e-23	-1229	TSS	TRUE
Aldh2	2370.23	3008.76	2633.86	0.342198	0.000528563		0.152901	0.165444	UP_reversed	0.0112963	FALSE					Gm28386	3.30272	3.17832e-45	419	TSS	TRUE
Aldh3a1	44.0216	276.192	174.883	2.39905	6.79251e-21	Up	1.80511	2.56957e-12	UP_reversed	0.000971811	FALSE					Farsb	3.07906	5.98563e-17	158	TSS	TRUE
Alg10b	7248.96	1904.47	3859.3	-1.88109	3.97228e-45	Dn	-0.889878	4.01122e-11	DN_reversed	4.94989e-08	FALSE					Acsl3	2.26412	2.16709e-17	1774	TSS	TRUE
Alg13	2807.91	2174.06	3462.35	-0.366196	0.000192155		0.296667	0.00231203	DN_reversed	0.000469724	FALSE					Mrpl44	4.41982	1.107e-14	81	TSS	TRUE
Alg6	1368.4	484.198	585.954	-1.45875	5.3699e-31	Dn	-1.20816	1.20021e-23	DN_reversed	0.043624	FALSE					Cul3	5.09979	3.69964e-24	79	TSS	TRUE
Alg9	1882.29	1001.99	1184.26	-0.899784	2.58512e-18	Dn	-0.65629	6.96386e-11	DN_reversed	0.0197053	FALSE					Irs1	4.66975	7.94273e-25	8015	gene_body	TRUE
Alkbh3	1063.66	1436.72	995.036	0.429992	5.7455e-05		-0.0912254	0.507175	UP_reversed	0.00193985	FALSE					Irs1	2.09856	1.38228e-33	1315	TSS	TRUE
Alkbh7	450.058	993.69	643.18	1.12027	1.15161e-18	Up	0.511181	0.000114611	UP_reversed	0.000853601	FALSE					Agfg1	5.19592	2.55516e-30	216	TSS	TRUE
Alkbh8	1525.6	795.867	1345.39	-0.917756	3.97941e-12	Dn	-0.18292	0.240017	DN_reversed	0.00350376	FALSE					Fbxo36	6.72327	6.18203e-54	-341	TSS	TRUE
Alyref2	79.0849	152.33	72.8657	0.876514	0.00121565	Up	-0.10096	0.798431	UP_reversed	0.0293099	FALSE					Cab39	3.12606	1.2679e-21	558	TSS	TRUE
Amd1	3027.94	1792.08	2838.08	-0.748259	2.92369e-15	Dn	-0.0932799	0.441538	DN_reversed	1.00172e-07	TRUE					C130036L24Rik	3.3883	1.59774e-66	1115	TSS	TRUE
Amd2	211.712	99.3723	187.75	-1.0143	5.91061e-06	Dn	-0.172076	0.522938	DN_reversed	0.0145159	FALSE					1700019O17Rik	2.62011	1.04138e-19	8570	intergenic	TRUE
Amdhd2	659.843	973.004	617.402	0.549773	1.00073e-05		-0.0873936	0.605354	UP_reversed	8.49711e-05	FALSE					Rpl30-ps6	2.23902	1.7552e-12	-7759	intergenic	TRUE
Amfr	10058.8	6936.17	8681.1	-0.531988	3.40009e-14		-0.210619	0.00472329	DN_reversed	0.000250738	FALSE					Rpl30-ps6	2.36776	1.16948e-24	-2359	TSS	TRUE
Ammecr1	2481.87	1030.51	1667.28	-1.24229	1.11049e-27	Dn	-0.56852	5.8389e-07	DN_reversed	3.85533e-16	FALSE					Ptma	2.89186	4.17722e-124	-3026	TSS	TRUE
Ammecr1l	1775.05	1482.19	1956.66	-0.259845	0.00600867		0.136571	0.172455	DN_reversed	0.0124651	TRUE					Pde6d	3.17086	8.77101e-48	228	TSS	TRUE
Amot	3537.13	2113.65	3717.29	-0.726959	1.88678e-08	Dn	0.0682411	0.713652	DN_reversed	1.49457e-05	TRUE					Efhd1	2.00646	1.49081e-13	-1063	TSS	TRUE
Amotl1	3619.35	2057.5	3024.79	-0.801281	2.81902e-12	Dn	-0.256871	0.0414984	DN_reversed	0.011437	FALSE					Gigyf2	4.76057	3.36356e-33	196	TSS	TRUE
Ampd3	630.455	352.018	605.346	-0.806971	3.78568e-06	Dn	-0.0487896	0.84945	DN_reversed	0.0227673	FALSE					Atg16l1	5.81555	7.22034e-44	86	TSS	TRUE
Amy1	1771.79	908.69	1478.73	-0.953103	1.38063e-21	Dn	-0.262196	0.011569	DN_reversed	2.33744e-05	FALSE					Arl4c	2.66091	1.51683e-28	775	TSS	TRUE
Anapc13	702.568	880.866	502.293	0.31659	0.0282804		-0.470599	0.000534737	UP_reversed	0.0432559	TRUE					Sh3bp4	4.27378	2.14369e-60	1184	TSS	TRUE
Ang	343.135	688.098	1115.35	0.974487	2.16301e-12	Up	1.66103	9.91292e-37	UP_reversed	0.000510279	FALSE					Agap1	3.1069	7.46681e-14	-1206	intergenic	TRUE
Angptl4	2816.1	5002.11	2890.54	0.820593	7.56624e-19	Up	0.0387796	0.785059	UP_reversed	4.20487e-07	FALSE					Agap1	2.72156	1.46857e-13	1493	gene_body	TRUE
Angptl6	58.1507	173.115	120.187	1.47464	8.81138e-11	Up	0.99345	1.60832e-05	UP_reversed	0.00233821	TRUE					Gm37297	2.17045	2.44405e-08	5661	gene_body	TRUE
Ankfy1	7853.39	4554.62	5838.78	-0.776807	1.748e-16	Dn	-0.423768	1.14812e-05	DN_reversed	0.000536587	FALSE					D130058E05Rik	2.03529	7.69191e-17	-3961	gene_body	TRUE
Ankib1	4418.25	2194.78	4455.7	-0.999825	1.04253e-29	Dn	0.0106633	0.942456	DN_reversed	9.65787e-12	TRUE					Gbx2	2.04277	2.74777e-10	-1321	TSS	TRUE
Ankrd10	2987.98	2142.98	2741.88	-0.475511	1.52534e-06		-0.120781	0.307077	DN_reversed	0.000140377	TRUE					Gbx2	2.22848	3.1828e-13	-9521	intergenic	TRUE
Ankrd13a	6957.8	4182	4705.18	-0.7288	5.37879e-23	Dn	-0.561044	1.93916e-14	DN_reversed	0.00604082	FALSE					Gm35048	2.1836	3.6793e-10	-596	TSS	TRUE
Ankrd13c	4264.49	2480.23	4758.05	-0.775503	1.86152e-25	Dn	0.157259	0.0540818	DN_reversed	1.85875e-13	TRUE					Cops8	2.41559	1.77242e-14	-81	TSS	TRUE
Ankrd17	13933.2	6468.24	12832.8	-1.09172	1.05425e-26	Dn	-0.117583	0.370933	DN_reversed	2.43082e-11	TRUE					Gm9991	2.10468	2.0486e-11	1438	TSS	TRUE
Ankrd26	1892.72	643.448	879.228	-1.50985	2.03633e-24	Dn	-1.08215	1.08232e-13	DN_reversed	0.0115658	TRUE					Ube2f	2.61387	2.50203e-24	-237	TSS	TRUE
Ankrd39	280.393	388.412	220.581	0.455127	0.016264		-0.342304	0.0825969	UP_reversed	0.03468	TRUE					Ilkap	2.13003	7.31128e-18	1099	TSS	TRUE
Ankrd49	1108.87	662.938	883.873	-0.731352	2.49332e-12	Dn	-0.327675	0.00162869	DN_reversed	0.0166321	FALSE					Per2	3.17547	3.81437e-71	1323	TSS	TRUE
Ankrd50	5497.26	3468.3	5110.7	-0.659036	1.06252e-17	Dn	-0.10535	0.257738	DN_reversed	0.0174558	TRUE					Asb1	4.59037	2.07029e-82	-314	TSS	TRUE
Ankrd52	8363.76	3848.09	5481.62	-1.09478	3.35017e-17	Dn	-0.597306	7.47639e-06	DN_reversed	9.78066e-05	FALSE					Twist2	3.0829	7.86568e-42	-161	TSS	TRUE
Anln	18708.3	9084.82	13995.6	-1.0308	7.60148e-30	Dn	-0.414768	1.0926e-05	DN_reversed	0.000243581	TRUE					Hdac4	15.8602	0	-159	TSS	TRUE
Anp32e	14662.1	7476	9338.37	-0.965025	3.1311e-43	Dn	-0.646675	2.36255e-20	DN_reversed	0.000174785	TRUE					Olfr1414	2.23622	1.1448e-12	-3439	intergenic	TRUE
Anxa1	21539.1	27151.1	24560.6	0.331322	4.40532e-05		0.187669	0.0303025	UP_reversed	0.000316603	FALSE					Capn10	2.10468	1.82162e-19	-1276	TSS	TRUE
Anxa2	55840.6	64536.7	50430.4	0.207347	0.00824434		-0.145947	0.076414	UP_reversed	0.028943	FALSE					Ppp1r7	3.42488	7.46988e-42	345	TSS	TRUE
Anxa7	4073.04	5978.48	5711.81	0.548465	2.35209e-12		0.484026	5.60807e-10	UP_reversed	0.000367637	TRUE					Sept2	3.12463	1.07421e-39	335	TSS	TRUE
Anxa8	344.155	1085.42	1504.8	1.60861	6.18122e-30	Up	2.07208	5.23113e-51	UP_reversed	0.00274081	FALSE					Farp2	2.77434	6.58407e-16	520	TSS	TRUE
Aox1	37.6134	111.299	89.9483	1.41664	1.4504e-07	Up	1.13192	2.38145e-05	UP_reversed	0.0043277	TRUE					Gm28536	2.82816	1.98553e-23	306	TSS	TRUE
Ap1g1	5384.05	3412.38	5400.78	-0.651493	6.74937e-14	Dn	0.00292069	0.984889	DN_reversed	3.42606e-06	TRUE					Bok	2.34851	1.46886e-23	1639	TSS	TRUE
Ap3b1	3181.6	2551.98	3128.95	-0.316594	7.79395e-05		-0.023833	0.840174	DN_reversed	0.0174093	TRUE					Thap4	2.4839	1.05195e-36	2779	TSS	TRUE
Ap3m1-ps	477.106	135.208	204.843	-1.71884	6.13711e-20	Dn	-1.18121	1.63095e-11	DN_reversed	0.0380996	FALSE					Ing5	3.36748	7.62086e-58	34	TSS	TRUE
Ap3s1	994.623	515.134	1067.01	-0.920871	1.04042e-12	Dn	0.10279	0.532881	DN_reversed	8.80011e-08	FALSE					Neu4	2.01549	3.59954e-11	3706	gene_body	TRUE
Ap4e1	1303.69	872.581	1267.7	-0.56628	6.60681e-05		-0.0437246	0.833722	DN_reversed	0.0163534	FALSE					Fam174a	3.48933	2.9392e-16	376	TSS	TRUE
Ap5s1	239.895	326.651	225.426	0.423264	0.0293234		-0.0842938	0.743259	UP_reversed	0.0466648	FALSE					D1Ertd622e	4.66975	7.94273e-25	773	gene_body	TRUE
Ap5z1	703.048	1235.82	706.666	0.803099	6.7214e-14	Up	0.0112551	0.951283	UP_reversed	3.23794e-06	FALSE					Gin1	2.0642	8.76959e-11	-697	TSS	TRUE
Apbb1ip	2537.9	801.029	751.734	-1.63594	3.95835e-50	Dn	-1.73603	1.37014e-59	DN_reversed	0.000246268	TRUE					Pam	4.80415	7.94922e-37	231	TSS	TRUE
Apc	4666.11	2535.77	4442.74	-0.858818	1.04453e-10	Dn	-0.0704392	0.71574	DN_reversed	0.00107219	TRUE					2310035C23Rik	4.17646	3.39195e-38	-213	TSS	TRUE
Apcdd1	5819.37	1549.24	2217.13	-1.89378	1.16121e-126	Dn	-1.38241	2.70603e-74	DN_reversed	1.22402e-09	TRUE					Zcchc2	3.07809	9.40006e-47	1393	TSS	TRUE
Api5	7873.42	6172.71	8827.32	-0.348606	2.39124e-05		0.162758	0.0698766	DN_reversed	5.0379e-05	TRUE					Phlpp1	3.32882	3.95357e-35	147	TSS	TRUE
Apitd1	755.226	1440.34	905.994	0.915145	1.2698e-16	Up	0.259829	0.0354831	UP_reversed	4.46151e-05	TRUE					Kdsr	2.49707	1.35527e-20	-573	TSS	TRUE
Aplp2	9153.79	4264.71	4808.11	-1.09541	4.25868e-54	Dn	-0.923813	4.57706e-40	DN_reversed	0.0280019	TRUE					Vps4b	3.65223	3.48547e-16	266	TSS	TRUE
Apoo	117.714	61.8386	115.205	-0.857788	0.00324036	Dn	-0.0272054	0.94954	DN_reversed	0.035194	FALSE					Dsel	5.09979	3.69964e-24	317	TSS	TRUE
App	12295.3	5961.23	7710.42	-1.03885	5.27705e-58	Dn	-0.669412	1.97704e-25	DN_reversed	3.85964e-05	TRUE					Clasp1	2.00445	6.23733e-15	-358	TSS	TRUE
Appbp2	6654.7	5439.12	8003.73	-0.288536	0.00201626		0.262704	0.00469796	DN_reversed	0.00346235	TRUE					Ptpn4	5.32746	9.51573e-32	212	TSS	TRUE
Appl1	3124.68	2291.15	3099.04	-0.441602	6.45646e-05		-0.0141531	0.936065	DN_reversed	0.000360957	TRUE					Dbi	2.37625	7.89372e-19	1077	TSS	TRUE
Aqp3	71.3781	139.911	107.853	0.886099	0.000571822	Up	0.554264	0.0382312	UP_reversed	0.0178564	FALSE					C1ql2	2.21429	2.52799e-12	1017	TSS	TRUE
Aqr	4619.35	3153.36	4439.76	-0.545882	8.59857e-10		-0.0576547	0.64139	DN_reversed	0.000658208	FALSE					En1	2.5677	2.11548e-36	1181	TSS	TRUE
Arcn1	10862.6	5688.61	7999.8	-0.92406	2.98107e-26	Dn	-0.437872	9.48477e-07	DN_reversed	0.000130423	TRUE					Gm37174	2.89393	2.81982e-13	-292	TSS	TRUE
Areg	32.6928	576.018	577.421	3.91726	5.96445e-90	Up	3.92675	8.25824e-93	UP_reversed	3.79139e-05	FALSE					Ddx18	3.39986	4.09898e-11	88	TSS	TRUE
Arel1	1235.54	919.21	1372.17	-0.413536	0.00190267		0.144904	0.344892	DN_reversed	0.0429667	FALSE					Actr3	4.02143	3.81165e-31	326	TSS	TRUE
Arf1	22244.3	17326	18963.1	-0.357685	6.02382e-06		-0.228179	0.00562523	DN_reversed	0.0030733	TRUE					Slc35f5	2.12453	3.58127e-22	-1316	TSS	TRUE
Arf3	14580.8	5859.74	6099.79	-1.30618	8.2914e-75	Dn	-1.24775	6.83255e-70	DN_reversed	1.13064e-14	FALSE					Mgat5	3.13855	2.20479e-35	481	TSS	TRUE
Arf4	9792.87	7476.89	11365.5	-0.386636	1.8996e-06		0.213181	0.0125708	DN_reversed	6.09909e-06	FALSE					2900009J06Rik	4.95617	4.43827e-52	191	TSS	TRUE
Arfgef1	7723.76	3860.75	8059.49	-0.98911	2.8178e-28	Dn	0.0599199	0.63821	DN_reversed	6.07632e-14	TRUE					Rab3gap1	2.9597	4.93954e-18	-273	TSS	TRUE
Arfip1	3503.72	1955.34	3211.45	-0.832497	3.23812e-20	Dn	-0.126502	0.241586	DN_reversed	6.18148e-07	TRUE					R3hdm1	9.47104	4.84376e-170	375	TSS	TRUE
Arhgap11a	8369.71	4880.89	7051.89	-0.771902	1.06998e-23	Dn	-0.246027	0.0025775	DN_reversed	3.63866e-05	FALSE					Ubxn4	2.4993	5.48508e-12	-62	TSS	TRUE
Arhgap18	2028.09	772.472	1101.65	-1.36717	1.37767e-34	Dn	-0.865584	1.02678e-15	DN_reversed	0.000240811	TRUE					Mcm6	4.65244	6.46671e-29	163	TSS	TRUE
Arhgap21	4313.04	2973.24	5271.11	-0.52877	2.97124e-07		0.285042	0.0080721	DN_reversed	9.32584e-07	FALSE					Dars	4.17427	6.99999e-36	58	TSS	TRUE
Arhgap28	4682.18	2229.52	2308.08	-1.05707	3.74715e-33	Dn	-1.00978	1.73857e-31	DN_reversed	1.09839e-06	FALSE					Yod1	2.87514	3.63492e-28	-627	TSS	TRUE
Arhgap29	9270.2	2512.91	3687.58	-1.84423	1.76229e-50	Dn	-1.30491	2.68367e-26	DN_reversed	0.000554874	FALSE					Mapkapk2	3.09323	1.54581e-20	625	TSS	TRUE
Arhgap31	1851.31	1174.08	1848.98	-0.643067	1.20193e-07	Dn	-0.00377923	0.985385	DN_reversed	0.000657344	TRUE					Dyrk3	2.82026	5.80731e-13	-260	TSS	TRUE
Arhgap32	2251.2	1139.56	2522.93	-0.960227	1.38919e-15	Dn	0.159042	0.270122	DN_reversed	3.19934e-06	FALSE					Eif2d	2.21462	1.54569e-16	818	TSS	TRUE
Arhgap35	8805.05	5991.5	10959.3	-0.550814	2.63238e-12		0.31307	0.00010113	DN_reversed	1.50915e-08	TRUE					Ikbke	2.3792	1.84796e-14	-194	TSS	TRUE
Arhgap39	931.986	729.984	1209.66	-0.344513	0.00503246		0.371918	0.00109645	DN_reversed	0.00348199	FALSE					Srgap2	6.12152	1.7073e-202	46	TSS	TRUE
Arhgap42	1103.57	761.171	1397.48	-0.52609	9.87841e-07		0.334882	0.00133005	DN_reversed	0.0209492	TRUE					Slc41a1	3.29193	1.57487e-53	-1677	TSS	TRUE
Arhgap5	4765.45	1297.08	3780.83	-1.75471	3.47367e-16	Dn	-0.313955	0.229112	DN_reversed	7.70495e-13	FALSE					Nucks1	2.89393	8.76991e-25	1343	TSS	TRUE
Arhgef12	4131.31	2470.79	3777.45	-0.729033	2.05679e-11	Dn	-0.128336	0.342293	DN_reversed	0.00707097	TRUE					Slc45a3	2.58301	1.70515e-09	432	TSS	TRUE
Arhgef17	4652.82	2377.11	3026.41	-0.955126	2.75013e-21	Dn	-0.613276	1.27391e-09	DN_reversed	0.0471389	TRUE					Elk4	3.6481	4.32045e-27	692	TSS	TRUE
Arhgef19	493.914	670.128	798.493	0.438776	0.000989003		0.686572	2.33545e-08	UP_reversed	0.00262867	TRUE					Klhdc8a	2.96568	1.2498e-18	773	TSS	TRUE
Arhgef2	5706.24	14402	15417.8	1.32739	9.01378e-85	Up	1.42528	1.0326e-98	UP_reversed	0.00361708	FALSE					Tmcc2	2.35097	2.858e-14	1380	TSS	TRUE
Arhgef7	2483.52	1925.91	1886.01	-0.365512	6.6615e-05		-0.394143	9.04544e-06	DN_reversed	0.000633264	FALSE					Dstyk	3.55938	7.02862e-29	44	TSS	TRUE
Arid1b	2401.17	1382.37	1876.18	-0.790044	1.06033e-18	Dn	-0.352325	9.02544e-05	DN_reversed	0.00480544	TRUE					Lrrn2	2.07544	4.12151e-08	626	TSS	TRUE
Arid2	5224.24	2775.68	5064.2	-0.900361	5.76818e-20	Dn	-0.045695	0.755371	DN_reversed	2.08332e-07	TRUE					Mdm4	5.37861	5.00468e-19	-62	TSS	TRUE
Arid4b	1820.88	889.977	2411.67	-1.01412	5.54732e-19	Dn	0.396354	0.000536653	DN_reversed	6.65877e-15	FALSE					Pik3c2b	2.7836	3.59823e-15	487	TSS	TRUE
Arid5a	345.269	2569.1	2017.51	2.85292	2.97232e-169	Up	2.50699	1.5042e-132	UP_reversed	7.05519e-06	TRUE					Snrpe	3.07169	1.91032e-22	190	TSS	TRUE
Arl1	3717.3	2611.01	3641.19	-0.505855	5.17235e-10		-0.0304811	0.800948	DN_reversed	0.000609107	TRUE					Gm38140	2.20991	2.68367e-19	6958	intergenic	TRUE
Arl13b	1077.58	808.944	1818.01	-0.408743	0.000213964		0.741328	5.61739e-14	DN_reversed	0.000525106	TRUE					Tmem183a	2.28508	2.84119e-10	378	TSS	TRUE
Arl2bp	6857.86	5021.66	4658.48	-0.447357	8.48062e-10		-0.553809	8.56343e-15	DN_reversed	1.86529e-08	FALSE					Cyb5r1	2.77116	1.39848e-14	418	TSS	TRUE
Arl3	1366.18	1684.87	1081.7	0.298793	0.00313744		-0.33037	0.000841522	UP_reversed	0.0110447	FALSE					Adipor1	2.80623	2.60026e-24	-178	TSS	TRUE
Arl4d	141.836	999.784	720.632	2.72761	3.96273e-79	Up	2.2655	1.58867e-55	UP_reversed	0.00111262	FALSE					Ppp1r12b	2.67868	6.72144e-19	-260	TSS	TRUE
Arl5a	2172.49	1383.59	2474.72	-0.640558	6.56419e-09	Dn	0.182143	0.143921	DN_reversed	6.9665e-05	FALSE					Ube2t	4.68769	8.62013e-18	234	TSS	TRUE
Arl6ip6	1850.92	904.753	1478.11	-1.01906	7.95795e-30	Dn	-0.321855	0.000299895	DN_reversed	3.01253e-06	FALSE					Arl8a	2.53062	1.09156e-15	1075	TSS	TRUE
Armc1	3724.07	2511.77	3200.92	-0.563611	2.42946e-10		-0.218377	0.0219915	DN_reversed	0.0312302	TRUE					Rnpep	2.10468	1.00476e-12	483	TSS	TRUE
Armc8	2283.4	1835.48	2414.55	-0.314812	0.00081484		0.0770587	0.507388	DN_reversed	0.0148724	TRUE					Timm17a	2.76239	2.54996e-15	577	TSS	TRUE
Armcx2	7905.36	4032.3	5179.93	-0.964472	1.44077e-32	Dn	-0.605723	8.22571e-14	DN_reversed	0.0074737	FALSE					Lmod1	2.08444	4.26553e-11	5492	gene_body	TRUE
Arpc3	6213.53	9014.35	7236	0.531829	1.61179e-10		0.218527	0.015288	UP_reversed	0.00651115	FALSE					Shisa4	2.18396	1.25755e-32	536	TSS	TRUE
Arrdc1	252.131	410.008	248.452	0.679141	1.29826e-05	Up	-0.0186752	0.942124	UP_reversed	0.00568703	FALSE					Gm4793	2.0375	1.53276e-09	7326	gene_body	TRUE
Arsb	1858.55	319.691	608.105	-2.46962	1.43854e-72	Dn	-1.58392	1.39482e-35	DN_reversed	8.37188e-05	TRUE					Csrp1	2.08076	1.3298e-09	9138	gene_body	TRUE
Arxes2	1530.41	241.278	681.677	-2.6049	3.45617e-106	Dn	-1.15313	1.08272e-30	DN_reversed	1.07205e-23	FALSE					Phlda3	2.46977	4.34052e-32	3380	TSS	TRUE
Asah1	4424.55	2173.43	3301.11	-1.01379	4.79177e-30	Dn	-0.420496	3.08931e-06	DN_reversed	0.0200138	TRUE					Tmem9	2.3799	9.62831e-20	9049	gene_body	TRUE
Asah2	508.705	199.018	387.822	-1.29403	6.67996e-14	Dn	-0.390012	0.0269508	DN_reversed	0.020861	FALSE					5730559C18Rik	2.20586	4.57551e-13	263	TSS	TRUE
Asap1	13410.8	6392.43	8223.69	-1.06174	6.92746e-52	Dn	-0.700975	9.78512e-24	DN_reversed	9.80188e-07	FALSE					Camsap2	2.60161	1.11465e-14	203	TSS	TRUE
Asap2	1134.24	746.854	1154.38	-0.588011	2.36661e-06		0.0226309	0.906024	DN_reversed	0.00411224	FALSE					9230116N13Rik	6.02702	6.72419e-28	-81	TSS	TRUE
Ascc2	4503.6	5739.02	4289.93	0.346434	3.34205e-05		-0.0703274	0.517051	UP_reversed	0.0010574	FALSE					Zfp281	2.52227	1.79869e-22	698	TSS	TRUE
Ascc3	4476.38	3630.73	5920.34	-0.29834	0.0054832		0.397041	9.72962e-05	DN_reversed	0.00742276	TRUE					Gm19705	2.59413	4.54806e-17	7030	gene_body	TRUE
Asns	9913.6	21339.7	21630.1	1.09671	3.77332e-45	Up	1.1164	5.08342e-47	UP_reversed	0.0380401	FALSE					Nek7	2.83203	1.41116e-32	148	TSS	TRUE
Asph	6355.69	1576.01	2140.15	-1.98624	2.66715e-95	Dn	-1.55408	4.54044e-62	DN_reversed	0.00202826	FALSE					Lhx9	2.58301	2.30937e-13	7576	gene_body	TRUE
Asxl3	528.467	257.371	311.67	-0.993913	1.50604e-07	Dn	-0.74196	6.43887e-05	DN_reversed	0.0311824	FALSE					Lhx9	2.30619	1.52421e-13	1276	TSS	TRUE
Atad1	5730.25	3224.41	4794.44	-0.823625	6.86071e-27	Dn	-0.256744	0.00139181	DN_reversed	4.47089e-05	TRUE					Aspm	3.32539	9.25938e-19	-72	TSS	TRUE
Atad2	13660.8	11525.2	16042.2	-0.241601	0.0443681		0.227945	0.0568425	DN_reversed	0.0460112	TRUE					Trove2	2.93151	1.35412e-22	67	TSS	TRUE
Atad2b	932.725	329.589	601.84	-1.43584	5.79943e-17	Dn	-0.615331	0.000358542	DN_reversed	0.00409708	TRUE					Rgs2	3.48716	1.52602e-40	-1739	TSS	TRUE
Atf1	3139.62	2209.37	2861.82	-0.501679	5.86525e-11		-0.131665	0.126707	DN_reversed	9.21649e-09	FALSE					Ptgs2	2.53219	2.19426e-12	-31	TSS	TRUE
Atf5	3100.93	10436.3	8828.76	1.72474	2.69834e-62	Up	1.48766	9.14966e-47	UP_reversed	0.000245478	FALSE					BC003331	5.11819	7.78505e-40	79	TSS	TRUE
Atf7	4944.26	2432.03	3863.93	-1.00972	6.75605e-25	Dn	-0.352976	0.000546214	DN_reversed	6.99838e-05	TRUE					Gm10138	4.27249	1.47209e-61	381	TSS	TRUE
Atg16l2	511.396	1228.2	864.806	1.23912	5.10404e-25	Up	0.745156	8.87357e-10	UP_reversed	0.046616	FALSE					Trmt1l	3.23218	1.57872e-19	557	TSS	TRUE
Atg2b	4311.15	3617.15	4668.76	-0.250837	0.00348174		0.114178	0.232126	DN_reversed	0.00689937	TRUE					Rnf2	5.41202	7.83706e-29	154	TSS	TRUE
Atg3	2384.47	2080.03	2133.68	-0.195631	0.0366225		-0.159326	0.0881721	DN_reversed	0.0496379	FALSE					Edem3	8.09211	1.66967e-118	25	TSS	TRUE
Atg5	2248.12	1672.35	2236.49	-0.421901	1.29554e-05		-0.00833006	0.957882	DN_reversed	0.00273734	FALSE					Tsen15	7.01558	1.09252e-20	81	TSS	TRUE
Atg9b	259.629	998.03	1724.07	1.89356	4.3163e-44	Up	2.66811	1.6763e-91	UP_reversed	0.0020929	TRUE					Rgl1	2.86594	9.78688e-24	-95	TSS	TRUE
Atic	17344.8	13264.3	13616.9	-0.385132	3.48922e-09		-0.347221	1.01403e-07	DN_reversed	7.66688e-05	TRUE					Smg7	4.20935	4.82535e-55	-578	TSS	TRUE
Atl2	4713.73	3317.31	4805.21	-0.502913	1.30731e-10		0.0265733	0.822366	DN_reversed	1.04601e-09	FALSE					Lamc1	3.30216	3.82574e-21	-114	TSS	TRUE
Atp10a	3976.57	1596.86	1953.66	-1.29919	2.40346e-43	Dn	-1.01637	2.27186e-28	DN_reversed	0.00328046	TRUE					Dhx9	2.56842	3.41984e-22	1159	TSS	TRUE
Atp10d	1220.33	782.756	1420.73	-0.629143	1.71329e-08	Dn	0.214989	0.069682	DN_reversed	0.00273608	TRUE					Glul	3.04263	7.33037e-27	55	TSS	TRUE
Atp11a	3514.75	1524.43	2097.55	-1.18759	2.40131e-30	Dn	-0.73719	7.01148e-13	DN_reversed	9.2847e-05	FALSE					Ier5	5.49931	1.73597e-63	335	TSS	TRUE
Atp11b	4593.83	1936.96	3941.63	-1.2292	4.52465e-36	Dn	-0.220172	0.0424405	DN_reversed	2.05116e-09	TRUE					Stx6	2.32334	1.48588e-21	-1315	TSS	TRUE
Atp11c	1986.75	639.929	1935.11	-1.59342	4.09901e-34	Dn	-0.0405657	0.838164	DN_reversed	9.80879e-14	FALSE					Acbd6	2.56966	1.16264e-16	-322	TSS	TRUE
Atp13a3	10817.2	5762.37	15244.9	-0.899498	2.54033e-25	Dn	0.489662	2.24196e-08	DN_reversed	3.64383e-22	FALSE					Lhx4	2.00901	1.99459e-10	9683	gene_body	TRUE
Atp2a2	18097.6	14904.9	22611.2	-0.2787	7.14819e-06		0.319735	1.46656e-07	DN_reversed	0.000118587	TRUE					Qsox1	2.10468	1.81148e-16	-1311	TSS	TRUE
Atp2b1	10406.9	8185.07	16776.1	-0.342978	0.000281709		0.68132	2.11347e-14	DN_reversed	0.000539404	TRUE					Gm9694	2.84131	1.80059e-15	181	TSS	TRUE
Atp2c1	3156.08	1358.95	2367.24	-1.19793	1.42994e-36	Dn	-0.412996	1.50945e-05	DN_reversed	0.000665402	FALSE					Tor1aip1	2.30046	1.88401e-12	326	TSS	TRUE
Atp5d	10339.1	13096.7	8525.96	0.334579	0.0146045		-0.271579	0.0531761	UP_reversed	0.0215496	FALSE					Fam163a	2.39168	5.23413e-11	-374	TSS	TRUE
Atp5e	2571.76	5253.99	3106.93	1.01822	3.40155e-24	Up	0.27149	0.0143335	UP_reversed	5.69812e-08	TRUE					Soat1	2.87001	2.06652e-22	-369	TSS	TRUE
Atp5h	3837.61	5301.48	3516.57	0.459299	1.99867e-05		-0.122734	0.354117	UP_reversed	0.00189634	FALSE					Abl2	3.39087	2.18156e-27	12	TSS	TRUE
Atp5j2	6132.65	7917.82	5552.87	0.364416	0.000386593		-0.140062	0.23959	UP_reversed	0.000855405	FALSE					Tor3a	2.63084	7.78104e-16	55	TSS	TRUE
Atp5o	6381.54	7927.12	6039.78	0.309856	0.000619695		-0.0777406	0.498603	UP_reversed	0.0050928	FALSE					Fam20b	7.69868	7.60666e-72	-128	TSS	TRUE
Atp6v0a2	3779.03	2025.97	2488.42	-0.890158	5.91447e-22	Dn	-0.599267	6.39115e-11	DN_reversed	0.0318778	FALSE					2810025M15Rik	2.55568	1.06969e-13	-252	TSS	TRUE
Atp6v1a	6010.66	5141.68	7282.76	-0.224258	0.00392159		0.275073	0.000206519	DN_reversed	0.00892212	FALSE					Mrps14	3.68318	6.32341e-26	-15	TSS	TRUE
Atp6v1f	1901.05	4962.02	4012.25	1.36114	4.20482e-34	Up	1.06115	3.10119e-21	UP_reversed	0.00634937	FALSE					4933417C20Rik	2.44053	8.96826e-16	856	TSS	TRUE
Atp7a	1528.96	418.349	1333.83	-1.68997	3.44123e-11	Dn	-0.181705	0.605541	DN_reversed	0.00191568	FALSE					Rabgap1l	2.51871	9.89911e-22	1145	TSS	TRUE
Atp8b2	7869.54	4056.23	7107.45	-0.947572	9.62422e-34	Dn	-0.146785	0.103502	DN_reversed	0.000435631	FALSE					Rc3h1	5.594	7.31071e-41	281	TSS	TRUE
Atpif1	1764.71	2232.9	1520.29	0.332903	0.01534		-0.207221	0.159903	UP_reversed	0.0267473	TRUE					Zbtb37	3.05178	2.87261e-40	-851	TSS	TRUE
Atrn	4056.64	2435.16	3426.75	-0.723349	6.71999e-11	Dn	-0.241262	0.0483378	DN_reversed	0.00183395	FALSE					Cenpl	2.93151	1.18329e-15	-13	TSS	TRUE
Atrx	8388.33	4256.73	8408.2	-0.920362	1.75137e-05	Dn	0.00287361	0.993824	DN_reversed	0.0491216	TRUE					Klhl20	2.01698	1.70109e-07	1010	TSS	TRUE
Atxn2	4423.29	3902.77	5032.34	-0.179012	0.0802264		0.183979	0.063065	DN_reversed	0.048451	TRUE					Prdx6	2.02814	9.9725e-11	1318	TSS	TRUE
Atxn7	1026.56	806.291	1207.07	-0.339017	0.0175561		0.224596	0.124055	DN_reversed	0.0223096	FALSE					Suco	3.76928	8.83444e-52	-1018	TSS	TRUE
Atxn7l3	4713.22	4127.14	5428.24	-0.189652	0.0348071		0.202918	0.01879	DN_reversed	0.0479659	TRUE					Pigc	3.98385	3.32349e-16	0	TSS	TRUE
Atxn7l3b	7444.45	5758.09	8307.49	-0.367096	8.378e-05		0.155933	0.134389	DN_reversed	0.000559866	FALSE					Mettl13	2.24818	6.28631e-12	350	TSS	TRUE
AU020206	2211.4	4233.91	3522.19	0.926901	1.99298e-28	Up	0.663695	3.07286e-15	UP_reversed	0.00446709	TRUE					Vamp4	4.05902	2.84285e-24	284	TSS	TRUE
Aunip	663.073	1866.67	1185.4	1.47003	1.48982e-40	Up	0.82906	1.33579e-13	UP_reversed	9.10969e-05	FALSE					Prrc2c	2.60454	3.66064e-16	-544	TSS	TRUE
Aurka	4588.52	5272.07	3821.11	0.197762	0.0127618		-0.263257	0.000501082	UP_reversed	0.0450886	FALSE					Gorab	2.98162	1.58359e-23	368	TSS	TRUE
Aurkaip1	2324.18	3296.25	2295.66	0.498285	5.83662e-08		-0.0149162	0.920925	UP_reversed	0.00449768	TRUE					Scyl3	4.60398	3.63563e-24	1099	gene_body	TRUE
Avpi1	2541.95	4911.47	3389.52	0.939218	2.12133e-22	Up	0.411879	4.28801e-05	UP_reversed	9.28775e-07	TRUE					Slc19a2	2.47948	1.34635e-24	653	TSS	TRUE
Axin1	5147.66	4492.23	5925.79	-0.194821	0.0154788		0.201774	0.00945835	DN_reversed	0.0264263	FALSE					Blzf1	2.21354	4.03504e-08	83	TSS	TRUE
Axl	34411.4	16842.2	19238.2	-1.02513	6.36557e-58	Dn	-0.834587	4.14775e-39	DN_reversed	0.0300337	TRUE					Dpt	2.18721	1.53004e-12	1055	TSS	TRUE
B230209E15Rik	43.5685	314.847	227.72	2.63113	4.78271e-32	Up	2.19916	4.72656e-23	UP_reversed	0.0177638	FALSE					4930568G15Rik	2.12615	3.54963e-11	8627	gene_body	TRUE
B230219D22Rik	5837.68	2387.53	4605.42	-1.27539	5.87767e-41	Dn	-0.339736	0.000644029	DN_reversed	3.49225e-11	FALSE					Sft2d2	2.20991	2.63621e-08	-262	TSS	TRUE
B230354K17Rik	1332.19	705.131	1162.66	-0.895496	1.92328e-13	Dn	-0.19667	0.152408	DN_reversed	0.03356	FALSE					Tiprl	3.95534	4.14217e-31	142	TSS	TRUE
B330016D10Rik	88.4495	149.821	109.827	0.68646	0.0113535		0.300086	0.330356	UP_reversed	0.0377938	TRUE					Dcaf6	7.02374	8.33962e-137	464	TSS	TRUE
B3galnt1	1902.33	783.181	1140.42	-1.25806	1.61881e-35	Dn	-0.732619	4.55516e-14	DN_reversed	0.00838823	TRUE					Mpzl1	3.45383	9.35332e-31	-971	TSS	TRUE
B3galnt2	2192.98	1670.4	2078.96	-0.384845	1.50935e-05		-0.0760266	0.496193	DN_reversed	0.0254094	TRUE					Gm18407	3.72076	1.72559e-26	2487	intergenic	TRUE
B4galt6	2113.25	720.158	1451.24	-1.51827	6.99409e-44	Dn	-0.537039	5.01661e-07	DN_reversed	2.58648e-09	FALSE					Creg1	2.11929	1.7649e-15	1553	TSS	TRUE
Bach2	684.748	278.297	283.738	-1.26632	2.48065e-20	Dn	-1.24088	6.55538e-22	DN_reversed	9.56446e-07	TRUE					Pou2f1	5.01614	1.22125e-51	377	TSS	TRUE
Bag3	3911.57	17283.2	7559.59	2.13183	2.89182e-238	Up	0.945563	5.59509e-47	UP_reversed	8.77022e-17	TRUE					Gm15853	2.19699	5.36144e-14	-682	TSS	TRUE
Bag4	862.266	628.376	1118.7	-0.450038	0.00052582		0.366241	0.00330075	DN_reversed	0.000966422	FALSE					Uck2	4.1165	2.74975e-39	819	TSS	TRUE
Bag5	1114.89	2009.81	1438.66	0.837606	2.58464e-20	Up	0.361425	0.000130434	UP_reversed	0.00165594	FALSE					Tmco1	3.68318	9.16344e-21	-36	TSS	TRUE
Baiap2	4198.79	9766.97	6258.34	1.20865	4.47919e-58	Up	0.57172	9.76481e-14	UP_reversed	6.8049e-06	FALSE					Aldh9a1	2.40534	9.68559e-12	-91	TSS	TRUE
Banf1	9405.34	11829.7	9128.37	0.326113	0.00409034		-0.041707	0.796026	UP_reversed	0.0193479	FALSE					Pbx1	2.87845	7.69703e-18	-1030	TSS	TRUE
Basp1	11882.9	9151.69	10152.6	-0.373	6.48516e-06		-0.224245	0.00962637	DN_reversed	0.0130979	TRUE					Hsd17b7	5.88071	3.03181e-40	40	TSS	TRUE
Baz1a	6796.04	3247.14	6367.15	-1.052	5.48566e-28	Dn	-0.0939591	0.456791	DN_reversed	1.31393e-19	TRUE					Ddr2	2.37222	6.44154e-18	660	TSS	TRUE
Baz1b	25451.2	17469.7	19903.9	-0.537528	1.11483e-09		-0.351567	0.000106699	DN_reversed	0.019599	TRUE					Gm37748	3.12695	3.19438e-22	419	TSS	TRUE
Baz2a	4167.66	3491.52	4303.61	-0.250971	0.0369596		0.0443719	0.782955	DN_reversed	0.0341249	FALSE					Uhmk1	3.83794	6.83439e-18	96	TSS	TRUE
Bbc3	501.625	1308.85	1075.28	1.35527	2.98497e-24	Up	1.08142	4.79614e-16	UP_reversed	0.000799658	TRUE					Olfml2b	2.19237	2.04298e-09	-132	TSS	TRUE
Bbx	3947.34	1848.6	2945.76	-1.07398	3.73425e-19	Dn	-0.416334	0.000904892	DN_reversed	0.0224749	TRUE					Gm9929	2.80623	5.30567e-19	254	TSS	TRUE
BC005537	9603.45	6293.35	8100.92	-0.606073	3.31304e-15	Dn	-0.243703	0.00275149	DN_reversed	6.07548e-05	TRUE					Gm26620	3.30051	1.85485e-16	34	TSS	TRUE
BC022687	760.325	2981.8	3889.46	1.94174	2.44894e-73	Up	2.32135	3.86915e-107	UP_reversed	0.0144136	FALSE					Mpz	2.41559	1.77242e-14	888	TSS	TRUE
BC029214	323.056	783.163	437.632	1.24032	2.0609e-19	Up	0.430992	0.00378928	UP_reversed	0.00686566	FALSE					Adamts4	2.33568	1.89505e-12	-3321	gene_body	TRUE
BC030336	2140.06	1605.75	2648.72	-0.411492	1.03102e-05		0.302193	0.00101124	DN_reversed	4.74735e-05	FALSE					Ndufs2	2.3905	1.7251e-24	-1149	TSS	TRUE
Bcap29	1309.13	723.811	1072.04	-0.841367	4.03043e-17	Dn	-0.288071	0.0043554	DN_reversed	4.32431e-06	FALSE					Ndufs2	2.07623	6.71965e-15	-6749	gene_body	TRUE
Bcar1	6904.56	8146.49	5568.48	0.236985	0.00468303		-0.306871	0.000144207	UP_reversed	0.0193473	FALSE					Usp21	2.23496	1.16245e-25	1890	TSS	TRUE
Bcat1	9924.59	8125.37	8825.05	-0.286784	0.000122554		-0.167801	0.0335426	DN_reversed	0.0255997	FALSE					Dedd	2.35022	1.00151e-09	354	TSS	TRUE
Bcl3	193.52	400.031	326.366	1.00707	5.06132e-07	Up	0.734604	0.000293731	UP_reversed	0.00110027	TRUE					Tstd1	3.77088	1.2826e-23	386	TSS	TRUE
Bcl6	628.785	3009.97	1659.33	2.23039	7.54414e-127	Up	1.381	6.94468e-49	UP_reversed	2.50505e-10	FALSE					Vangl2	3.07906	5.98563e-17	1043	gene_body	TRUE
Bcl9	1454.8	1022.59	1567.24	-0.501557	2.30678e-06		0.104228	0.419235	DN_reversed	0.00184971	FALSE					Ncstn	2.40534	9.67391e-10	-505	TSS	TRUE
Bcl9l_v1	4317.54	1655.54	2313.67	-1.36486	1.57507e-44	Dn	-0.890674	1.50282e-20	DN_reversed	1.09651e-06	TRUE					Dcaf8	2.7836	3.59823e-15	121	TSS	TRUE
Bclaf1	12230.9	9305.1	11747.7	-0.391995	4.6707e-08		-0.0584266	0.541467	DN_reversed	0.000634417	TRUE					Pigm	4.00207	2.34757e-70	-346	TSS	TRUE
Bcor	2093.05	1587.96	2302.1	-0.394308	4.92613e-05		0.133724	0.223427	DN_reversed	0.000386097	FALSE					Dusp23	4.14358	1.01498e-19	461	TSS	TRUE
Bdp1	3174.28	1401.78	3360.75	-1.14563	5.40805e-16	Dn	0.0782961	0.703051	DN_reversed	5.23515e-12	FALSE					Fh1	4.6829	1.00373e-30	34	TSS	TRUE
Bend3	2251.91	1538.13	2189.17	-0.543179	7.51905e-08		-0.0421334	0.773745	DN_reversed	5.51533e-07	FALSE					Chml	2.84857	1.89671e-28	-824	TSS	TRUE
Bet1	1035.98	537.63	800.893	-0.930043	2.49002e-17	Dn	-0.367983	0.000662288	DN_reversed	0.0499373	FALSE					Exo1	3.92235	1.22244e-23	818	TSS	TRUE
Bgn	100499	49031.4	46992.4	-1.03028	5.6784e-64	Dn	-1.09117	5.72885e-72	DN_reversed	6.51658e-07	FALSE					Cep170	2.59037	3.31528e-20	466	TSS	TRUE
Bicd2	4904.99	4008.05	4659.37	-0.28974	0.00088882		-0.0748103	0.491215	DN_reversed	0.00693241	FALSE					Gm38158	3.06551	1.46259e-14	-824	TSS	TRUE
Bin3	675.233	1316.17	791.014	0.946079	8.97111e-19	Up	0.228916	0.0604052	UP_reversed	0.00780737	TRUE					Akt3	2.36776	2.29272e-09	102	TSS	TRUE
Birc3	340.986	768.372	613.248	1.13695	2.91382e-14	Up	0.814018	6.40555e-08	UP_reversed	0.0109095	FALSE					Gm26801	16.3112	1.59121e-175	1569	gene_body	TRUE
Birc6	11499.6	4156.66	6918.65	-1.4311	3.89649e-26	Dn	-0.716077	2.4781e-07	DN_reversed	0.000176041	TRUE					Adss	4.39079	1.76422e-38	610	TSS	TRUE
Bloc1s1	1901.64	2821.73	1802.48	0.562126	1.23479e-08		-0.0749485	0.578156	UP_reversed	2.81757e-07	TRUE					Desi2	3.4201	2.58404e-16	467	TSS	TRUE
Bloc1s2	679.101	1813.35	1543.51	1.39471	3.28346e-36	Up	1.1693	2.86673e-26	UP_reversed	0.0299338	TRUE					Cox20	2.88249	1.60482e-34	269	TSS	TRUE
Blvra	1308.97	1669.8	1161.05	0.347835	0.000517518		-0.171639	0.118593	UP_reversed	0.00289869	FALSE					Hnrnpu	4.93095	5.31104e-58	427	TSS	TRUE
Blvrb	2734.99	4685.09	3633.8	0.764695	3.79878e-12	Up	0.405453	0.000415139	UP_reversed	0.00855041	TRUE					Efcab2	6.53953	2.2674e-40	-103	TSS	TRUE
Bmi1	4765.73	2154.52	4193.72	-1.13371	4.09111e-36	Dn	-0.184501	0.0690305	DN_reversed	2.80356e-13	FALSE					Kif26b	3.02547	3.74496e-49	974	TSS	TRUE
Bmpr1a	5257.25	2432.46	4923.85	-1.10202	7.23135e-35	Dn	-0.0950487	0.407381	DN_reversed	1.1154e-09	TRUE					Smyd3	2.02373	4.71786e-08	733	TSS	TRUE
Bmpr2	3235.39	1350.96	3319.18	-1.23553	5.52336e-26	Dn	0.0342344	0.851092	DN_reversed	2.81912e-12	TRUE					Tfb2m	3.84508	1.7418e-26	-33	TSS	TRUE
Bms1	9118.29	7884.31	8444.18	-0.208853	0.00450544		-0.110775	0.16795	DN_reversed	0.0106284	FALSE					Ahctf1	2.80623	5.53897e-23	79	TSS	TRUE
Bmt2	2638.85	1151.06	3022.22	-1.17806	1.22602e-27	Dn	0.190397	0.119655	DN_reversed	9.12189e-16	TRUE					Coq8a	2.19539	3.49413e-14	519	TSS	TRUE
Bnip1	1202.51	1988.02	1260.74	0.715204	3.73109e-13	Up	0.0705181	0.610177	UP_reversed	1.43156e-05	FALSE					Psen2	2.64546	7.20081e-29	1599	TSS	TRUE
Bnip3l	2456.73	1773.72	3027.5	-0.465761	1.16748e-05		0.297701	0.00582222	DN_reversed	0.00583635	TRUE					Gm5069	2.63084	9.65034e-25	-2050	gene_body	TRUE
Bnip3l-ps	348.81	233.396	417.06	-0.551086	0.00148687		0.253275	0.155438	DN_reversed	0.0180766	FALSE					Parp1	3.73761	1.23821e-27	-29	TSS	TRUE
Bod1l	5599.73	2984.02	4586.78	-0.888884	3.78126e-12	Dn	-0.283295	0.0461804	DN_reversed	0.000205096	TRUE					Lin9	2.34091	1.24089e-14	149	TSS	TRUE
Bola2	1834.13	3068.28	1779.33	0.731759	8.10261e-11	Up	-0.0389495	0.823113	UP_reversed	0.000526529	FALSE					Acbd3	2.45545	1.65525e-14	-543	TSS	TRUE
Bpnt1	1965.8	1518.58	2029.08	-0.368684	3.91375e-05		0.0463017	0.705653	DN_reversed	0.000202616	FALSE					Gm38293	2.45915	8.72853e-31	-7944	intergenic	TRUE
Bptf	10834.4	7012.43	10148.2	-0.616929	9.4937e-08	Dn	-0.0933561	0.54641	DN_reversed	0.0010994	FALSE					H3f3aos	3.63354	4.1993e-46	523	TSS	TRUE
Braf	2307.58	1583.56	2248	-0.531508	8.22024e-06		-0.0398147	0.821422	DN_reversed	3.79132e-05	TRUE					Sde2	2.59668	2.79794e-29	-927	TSS	TRUE
Brd3	4250.28	3353.54	3780.81	-0.339084	1.50312e-05		-0.168449	0.0434367	DN_reversed	0.0149793	FALSE					Lefty2	2.19539	3.49413e-14	-4308	intergenic	TRUE
Brpf3	2091.57	1434.75	1783.19	-0.538844	4.70563e-09		-0.228507	0.0176555	DN_reversed	0.0444651	TRUE					Pycr2	2.00408	3.89782e-23	2106	TSS	TRUE
Brwd1	2029.63	1624.64	2526.93	-0.313954	0.0162904		0.30927	0.0147804	DN_reversed	0.0183923	FALSE					Wdr26	2.46469	2.0217e-13	-448	TSS	TRUE
Brwd3	1221.94	349.387	882.077	-1.73826	5.95388e-28	Dn	-0.462129	0.00444775	DN_reversed	5.38885e-07	FALSE					Cnih3	2.91417	1.83259e-14	969	gene_body	TRUE
Btaf1	7698.61	4303.44	7154.77	-0.826058	4.82583e-14	Dn	-0.105134	0.465986	DN_reversed	3.6512e-07	FALSE					Lbr	4.72269	3.82255e-62	878	TSS	TRUE
Btbd3	1100.13	923.041	1353.14	-0.254715	0.0274595		0.291644	0.00606102	DN_reversed	0.0381387	TRUE					Gm17968	2.51203	6.64715e-22	1588	TSS	TRUE
Btbd7	2235.22	1174.42	2268.25	-0.910855	8.57548e-15	Dn	0.0186051	0.922079	DN_reversed	8.94361e-06	FALSE					Gm10517	4.0515	4.05753e-23	20	TSS	TRUE
Btg2	670.814	8568.04	6379.92	3.63882	0	Up	3.21734	0	UP_reversed	8.99894e-10	FALSE					Ccdc185	2.03452	3.60341e-09	679	TSS	TRUE
Bub1	5880.54	4076.13	5277.21	-0.523796	1.37276e-09		-0.156157	0.111674	DN_reversed	0.0115489	TRUE					Gm24975	2.0579	1.77873e-09	6093	intergenic	TRUE
Bzw1	19230.4	13252.8	21027.3	-0.53348	1.42934e-12		0.127583	0.148099	DN_reversed	4.45967e-09	FALSE					Mia3_v1	2.78118	7.62275e-14	-404	TSS	TRUE
Bzw2	6256.03	4194.74	5691.68	-0.572143	3.21257e-13		-0.135219	0.135792	DN_reversed	1.93619e-05	FALSE					Mia3_v2	2.73608	3.81206e-14	-447	TSS	TRUE
C130083M11Rik	311.075	80.7479	134.581	-1.83158	2.55619e-17	Dn	-1.16559	4.08631e-09	DN_reversed	0.0159175	FALSE					Dusp10	5.62456	4.66387e-62	118	TSS	TRUE
C1d	2534.98	1037.8	996.614	-1.27778	7.33148e-43	Dn	-1.33367	9.54311e-50	DN_reversed	0.00238708	TRUE					Hlx	2.48051	1.10456e-23	518	TSS	TRUE
C1galt1	3424.82	1708.17	3351.9	-0.989881	3.05126e-20	Dn	-0.0330258	0.84299	DN_reversed	2.90206e-10	FALSE					Marc2	5.87555	6.28941e-29	280	TSS	TRUE
C330007P06Rik	821.796	437.972	775.091	-0.88761	1.62002e-13	Dn	-0.0883077	0.563018	DN_reversed	0.000550532	FALSE					Rab3gap2	2.85634	1.69043e-11	-17	TSS	TRUE
C330027C09Rik	6897.21	3665.53	6029.27	-0.901328	6.33521e-21	Dn	-0.19324	0.0767235	DN_reversed	2.30544e-06	FALSE					Gm29491	3.03559	7.13599e-16	-495	TSS	TRUE
C920009B18Rik	2051.98	703.533	1255.13	-1.50411	2.17326e-27	Dn	-0.696035	5.00348e-07	DN_reversed	6.27668e-05	FALSE					A430105J06Rik	2.48968	1.00679e-14	103	TSS	TRUE
C920021L13Rik	31.8333	127.644	80.5906	1.77333	3.14681e-10	Up	1.17372	4.67779e-05	UP_reversed	0.0265191	FALSE					Cenpf	11.193	1.09728e-77	85	TSS	TRUE
Caap1	833.815	374.15	636.776	-1.13007	1.07522e-19	Dn	-0.388715	0.00143033	DN_reversed	0.0033717	FALSE					Ptpn14	2.09612	2.13613e-24	1831	TSS	TRUE
Cacna1a	2564.48	540.842	467.241	-2.20179	2.53484e-81	Dn	-2.40772	1.57657e-103	DN_reversed	0.0215695	FALSE					Vash2	2.35132	8.03875e-19	795	TSS	TRUE
Cacybp	12257.2	10545.4	16803.9	-0.215846	0.00302502		0.452286	1.9864e-11	DN_reversed	0.00504099	FALSE					A230020J21Rik	3.07393	4.84636e-23	348	TSS	TRUE
Calcoco1	506.122	1579.11	1556.14	1.61372	7.31924e-53	Up	1.59463	1.84494e-53	UP_reversed	1.2798e-08	TRUE					Batf3	2.85634	9.75412e-15	419	TSS	TRUE
Calcrl	506.477	138.431	210.177	-1.78377	1.49954e-22	Dn	-1.23968	2.3979e-13	DN_reversed	0.0194343	FALSE					Nenf	2.00646	1.49081e-13	7193	gene_body	TRUE
Cald1	25253.1	12018.5	20336.9	-1.05586	2.69733e-24	Dn	-0.308337	0.00625543	DN_reversed	7.95019e-07	FALSE					Nenf	2.82026	5.80731e-13	693	TSS	TRUE
Calm2	12522.9	9398.97	12570.8	-0.410539	1.81382e-06		0.00560991	0.96837	DN_reversed	0.0147293	TRUE					Tmem206	2.06775	1.02053e-11	-612	TSS	TRUE
Calu	32357.1	17309.1	20125.7	-0.896494	1.93052e-36	Dn	-0.680683	1.37265e-21	DN_reversed	0.00366366	TRUE					Ppp2r5a	8.1495	3.63848e-177	740	TSS	TRUE
Camk2a	72.4079	15.7307	52.1334	-1.67638	3.36463e-06	Dn	-0.437662	0.264558	DN_reversed	0.00224257	FALSE					Ints7	2.87749	5.22617e-32	263	TSS	TRUE
Camsap2	3428.01	2226.43	4484.54	-0.613277	7.6178e-09	Dn	0.381084	0.000396798	DN_reversed	1.45114e-07	TRUE					Gm38037	2.81655	6.14319e-17	-7	TSS	TRUE
Cand1	16570.2	10079.7	13611.8	-0.713431	5.61842e-31	Dn	-0.282276	9.22275e-06	DN_reversed	2.2414e-09	TRUE					Slc30a1	2.02547	6.55202e-17	732	TSS	TRUE
Canx	63803.5	41197.3	50927.5	-0.627653	6.30971e-22	Dn	-0.32341	1.51079e-06	DN_reversed	2.26881e-06	TRUE					Rd3	2.15729	6.90462e-14	2829	gene_body	TRUE
Capg	8282.21	13129.6	9370.21	0.655851	1.22468e-10	Up	0.176365	0.138382	UP_reversed	1.45418e-06	FALSE					Gm26670	5.07598	1.21298e-59	21	TSS	TRUE
Capn1	2079.92	2500.16	2506.68	0.263663	0.00455119		0.268751	0.00295307	UP_reversed	0.0169498	FALSE					Gm26879	2.31169	3.49297e-17	-755	TSS	TRUE
Capn6	1525.96	444.508	716.511	-1.71136	3.56978e-23	Dn	-1.05559	5.85878e-10	DN_reversed	0.000433793	FALSE					Gm10516	2.85885	1.23755e-29	-96	TSS	TRUE
Capn7	2476.6	1286.63	1924.61	-0.935986	3.48759e-27	Dn	-0.362536	2.72152e-05	DN_reversed	1.56164e-05	TRUE					Hhat	2.02951	3.18897e-13	312	TSS	TRUE
Caprin1	28029.1	15583.1	27682.8	-0.840607	1.01826e-28	Dn	-0.0180204	0.884048	DN_reversed	7.56604e-14	TRUE					Gm38360	2.10468	2.32059e-09	-2873	intergenic	TRUE
Capza1	1620.68	868.666	1480.35	-0.88696	6.75225e-18	Dn	-0.133862	0.268489	DN_reversed	5.58177e-05	TRUE					Sertad4	2.32728	3.53114e-15	-844	TSS	TRUE
Capza2	12145	9101.91	13447.8	-0.413727	8.45953e-08		0.145491	0.0936023	DN_reversed	1.90792e-07	FALSE					Diexf	2.45545	1.65525e-14	-228	TSS	TRUE
Card19	619.122	1738.01	1407.93	1.45876	1.38016e-29	Up	1.1642	1.91559e-19	UP_reversed	0.000170068	FALSE					Plxna2	2.69661	3.63563e-27	-225	TSS	TRUE
Carm1	4899.27	2767.48	3377.69	-0.814544	8.13241e-20	Dn	-0.531531	2.81697e-09	DN_reversed	0.00125617	TRUE					Gm16897	2.38629	1.4362e-21	-840	TSS	TRUE
Carnmt1	91.731	39.9132	79.2785	-1.0133	0.000965047	Dn	-0.174105	0.645362	DN_reversed	0.0291585	TRUE					Cr1l	3.1069	7.46681e-14	-156	TSS	TRUE
Cask	3637.24	1841.89	2679.14	-0.971391	2.78022e-30	Dn	-0.439522	2.19305e-07	DN_reversed	0.000493929	TRUE					Gm38046	2.30377	5.37707e-11	-4452	intergenic	TRUE
Casp3	4467.36	3543.84	3766.1	-0.330997	0.00101308		-0.243934	0.0179629	DN_reversed	0.0216656	TRUE					Nmt2	3.67597	1.57583e-64	-412	TSS	TRUE
Casp4	228.968	1101.81	895.12	2.20471	3.02372e-66	Up	1.91223	3.60611e-51	UP_reversed	0.00317049	FALSE					Rpp38	2.41753	1.78484e-12	442	TSS	TRUE
Casp8ap2	3749.34	3008.32	5085.82	-0.309763	0.0500736		0.42736	0.00385812	DN_reversed	0.0480626	TRUE					Dclre1c	2.05206	5.73814e-12	-431	TSS	TRUE
Catip	13.8978	33.2376	28.6277	0.948602	0.0245859		0.805947	0.0549109	UP_reversed	0.0388558	FALSE					Suv39h2	3.36748	2.79163e-19	-169	TSS	TRUE
Cav1	38560.6	12065.7	17863.2	-1.66106	4.72359e-92	Dn	-1.10055	2.65289e-41	DN_reversed	0.000276783	FALSE					Hspa14	4.03396	7.77403e-59	513	TSS	TRUE
Cav2	6702.29	2373.9	3799.42	-1.4752	1.5143e-44	Dn	-0.809243	1.59002e-14	DN_reversed	0.00111179	FALSE					Sephs1	4.61859	4.1034e-27	235	TSS	TRUE
Cbarp	448.792	680.379	431.967	0.589	3.79052e-05		-0.0447075	0.835836	UP_reversed	0.0119719	FALSE					Mcm10	2.0054	4.70209e-10	743	TSS	TRUE
Cbfb	6067.28	4352.01	10248.1	-0.476667	5.92235e-10		0.749567	2.74173e-24	DN_reversed	2.06328e-08	TRUE					Cdc123	2.93379	3.65336e-18	-336	TSS	TRUE
Cbl	3158.28	2170.79	3837.23	-0.528293	0.000113839		0.273387	0.062833	DN_reversed	0.000142104	FALSE					Sec61a2	2.42357	2.18968e-11	331	TSS	TRUE
Cbll1	768.603	580.163	1094.94	-0.396326	0.000893009		0.50083	3.00769e-06	DN_reversed	0.00198602	TRUE					Upf2	2.74298	3.96649e-27	-69	TSS	TRUE
Cbx3	1100.66	620.109	841.673	-0.814732	6.47289e-15	Dn	-0.38526	0.00016571	DN_reversed	0.000942189	TRUE					4930412O13Rik	3.05294	6.52229e-52	-1152	TSS	TRUE
Cbx4	723.363	1566.44	1175.69	1.10083	4.48288e-25	Up	0.688281	1.48405e-10	UP_reversed	0.00483712	FALSE					C630004M23Rik	4.92494	7.93484e-42	361	TSS	TRUE
Cbx6	27874.4	15654.9	14815.3	-0.828148	3.56224e-41	Dn	-0.907366	8.8329e-50	DN_reversed	0.0315145	FALSE					Atp5c1	3.00668	1.37316e-16	309	TSS	TRUE
Cbx8	550.333	1539.88	928.668	1.45914	6.56314e-40	Up	0.742309	4.72296e-11	UP_reversed	3.94142e-07	FALSE					Rbm17	2.91417	1.83259e-14	261	TSS	TRUE
Ccar1	9528.85	6167.7	9662.45	-0.621705	5.23938e-13	Dn	0.0190781	0.890514	DN_reversed	3.09887e-08	TRUE					Ankrd16	6.60103	1.98301e-249	308	TSS	TRUE
Ccdc109b	600.167	1400.56	1382.39	1.20213	1.4139e-25	Up	1.18455	1.13272e-25	UP_reversed	3.53472e-07	TRUE					C1ql3	2.61061	1.29099e-20	905	TSS	TRUE
Ccdc12	652.561	1100.2	698.921	0.741305	1.27477e-09	Up	0.102929	0.530349	UP_reversed	0.000605698	TRUE					Trdmt1	2.57992	1.27465e-12	-532	TSS	TRUE
Ccdc124	2481.17	3341.04	1986.34	0.424207	3.84586e-05		-0.31415	0.00306966	UP_reversed	0.00025292	TRUE					Vim	2.56339	1.24287e-28	447	TSS	TRUE
Ccdc130	308.562	645.805	459.986	1.03814	4.07468e-14	Up	0.569264	5.42604e-05	UP_reversed	0.00642949	TRUE					Hacd1	3.62472	3.12799e-24	835	TSS	TRUE
Ccdc157	945.449	1432.76	900.336	0.591567	4.97309e-07		-0.0727902	0.660178	UP_reversed	0.00381531	FALSE					Stamos	2.6983	2.93517e-17	-66	TSS	TRUE
Ccdc22	1276.35	1593.86	1218.51	0.315532	0.000936346		-0.0661524	0.594156	UP_reversed	0.0113516	FALSE					Gm10849	2.29356	2.31824e-11	-389	TSS	TRUE
Ccdc28a	88.6527	213.861	186.864	1.19329	1.25987e-08	Up	1.00509	1.16658e-06	UP_reversed	0.00934406	FALSE					Nsun6	5.30952	1.11544e-42	-216	TSS	TRUE
Ccdc47	10968.1	6259.16	7553.16	-0.802094	8.64707e-23	Dn	-0.534549	7.77719e-11	DN_reversed	6.14667e-05	FALSE					Gm13330	2.31218	9.80949e-20	-5133	gene_body	TRUE
Ccdc50	6304.75	3292.27	5834.92	-0.926962	7.41188e-22	Dn	-0.111482	0.362595	DN_reversed	4.31891e-06	TRUE					Skida1	2.70601	8.85378e-16	1950	gene_body	TRUE
Ccdc50-ps	250.832	155.631	268.842	-0.660817	0.00050825	Dn	0.0863693	0.723461	DN_reversed	0.0195706	FALSE					1810059C17Rik	4.56013	4.30703e-51	-387	TSS	TRUE
Ccdc53	1068.17	1425.89	1069.95	0.410197	0.000215004		0.00650095	0.970881	UP_reversed	0.0119297	FALSE					Mir7655	4.24982	1.70052e-32	6953	gene_body	TRUE
Ccdc71	1428.32	1729.41	1319.77	0.273215	0.00445534		-0.111647	0.310479	UP_reversed	0.0175009	FALSE					Dnajc1	2.50704	9.99435e-13	-289	TSS	TRUE
Ccdc80	1584.21	589.525	795.194	-1.40507	4.49654e-40	Dn	-0.985806	7.3004e-23	DN_reversed	0.0230715	FALSE					Spag6	2.25943	9.79466e-10	-9323	intergenic	TRUE
Ccdc85c	181.888	46.0412	83.5464	-1.73162	4.68785e-10	Dn	-1.00945	0.000125749	DN_reversed	0.0447444	TRUE					Spag6	3.04009	1.40497e-11	-4323	intergenic	TRUE
Ccdc88a	3970.13	1629.02	4216.65	-1.25376	4.40638e-21	Dn	0.0834474	0.659936	DN_reversed	8.75433e-07	TRUE					Pip4k2a	2.21354	1.59939e-14	-74	TSS	TRUE
Cchcr1	2190.8	2912.82	2049.59	0.406757	1.43217e-06		-0.0962924	0.35612	UP_reversed	0.0175691	FALSE					Gm13375	5.26169	7.58113e-33	445	TSS	TRUE
Ccl2	3920.62	5843.21	3633.48	0.56917	1.05648e-10		-0.109877	0.317273	UP_reversed	1.80655e-10	FALSE					Thnsl1	3.59033	1.24979e-15	-124	TSS	TRUE
Ccl5	408.969	1443.14	1035.79	1.78735	1.50287e-52	Up	1.31736	2.39514e-29	UP_reversed	5.28749e-20	FALSE					Apbb1ip	2.07698	1.74784e-08	605	TSS	TRUE
Ccl7	2238.03	4682.58	2403.56	1.04635	1.68276e-20	Up	0.0986735	0.522788	UP_reversed	2.96442e-24	FALSE					Pdss1	3.04009	1.80819e-16	77	TSS	TRUE
Ccl8	19.0028	57.99	96.3612	1.34498	1.6646e-05	Up	2.0102	2.00548e-12	UP_reversed	9.35668e-05	FALSE					Acbd5	3.60801	1.44401e-30	231	TSS	TRUE
Ccna2	12210.7	6171.31	7411.86	-0.978274	5.94588e-47	Dn	-0.716035	2.81271e-26	DN_reversed	0.0067051	FALSE					Yme1l1	2.93547	1.12333e-20	-169	TSS	TRUE
Ccnb1ip1	546.423	352.292	509.206	-0.61836	2.41129e-05	Dn	-0.1026	0.577258	DN_reversed	8.93598e-05	FALSE					Pax8	2.12314	1.13414e-12	198	TSS	TRUE
Ccnc	1800.39	1169.43	2055.38	-0.61543	3.38508e-10	Dn	0.185294	0.0812451	DN_reversed	3.80567e-05	TRUE					Ehmt1	2.53518	4.32211e-09	313	TSS	TRUE
Ccnd2	9020.31	3579.87	5579.74	-1.31845	8.37152e-49	Dn	-0.687079	2.36082e-14	DN_reversed	2.22127e-18	TRUE					Zmynd19	4.15673	7.47913e-47	107	TSS	TRUE
Ccnd3	4880.15	2551.46	2217.51	-0.920893	1.9525e-20	Dn	-1.12128	2.03206e-30	DN_reversed	0.00535329	FALSE					Pnpla7	2.74127	2.11224e-35	166	TSS	TRUE
Ccndbp1	700.021	1280.7	971.112	0.860862	6.76555e-18	Up	0.466618	4.59841e-06	UP_reversed	0.00156399	TRUE					Stpg3	2.03589	3.22809e-27	1030	TSS	TRUE
Ccne1	2672.61	2055.84	1771.71	-0.374621	1.18215e-05		-0.587436	5.87538e-13	DN_reversed	0.00041479	TRUE					Tprn	2.15369	8.09748e-76	4681	TSS	TRUE
Ccne2	1941.71	930.449	3080.19	-1.04826	1.59274e-28	Dn	0.656165	1.36845e-13	DN_reversed	5.0081e-25	TRUE					Man1b1	2.13201	9.73961e-17	370	TSS	TRUE
Ccng1	30185.6	15573.1	28054.3	-0.948743	1.06222e-42	Dn	-0.10498	0.216467	DN_reversed	1.51336e-07	FALSE					Sapcd2	2.11109	1.00736e-32	2078	TSS	TRUE
Ccng2	1230.74	2833.95	2800.73	1.18484	7.17096e-27	Up	1.16794	1.32566e-26	UP_reversed	1.96948e-05	TRUE					Clic3	2.37451	9.31522e-45	1661	TSS	TRUE
Ccni	5236.21	2919.15	4445.11	-0.835928	5.34145e-26	Dn	-0.233728	0.00548324	DN_reversed	4.54659e-05	TRUE					Traf2	5.16492	1.64512e-155	1539	TSS	TRUE
Ccnj	818.886	669.614	972.732	-0.281906	0.028805		0.241666	0.0501218	DN_reversed	0.0398301	TRUE					Gm26702	2.02924	8.45699e-48	568	TSS	TRUE
Ccnl2	5648.72	9645.97	6822.96	0.764051	2.55505e-18	Up	0.268733	0.00441649	UP_reversed	0.0112449	TRUE					Rabl6	2.93547	1.12333e-20	-179	TSS	TRUE
Ccny	4535.22	2394.87	3216.9	-0.912058	1.12633e-32	Dn	-0.492453	8.60711e-11	DN_reversed	0.000107361	TRUE					Camsap1	3.88049	8.44008e-33	-118	TSS	TRUE
Ccp110	2980.96	1673.44	2705.48	-0.819958	5.20318e-13	Dn	-0.140309	0.312801	DN_reversed	1.53489e-05	FALSE					Ubac1	3.39087	5.41557e-21	646	TSS	TRUE
Cct6a	31674	21134.2	26475.6	-0.580261	4.3208e-17		-0.257196	0.000388158	DN_reversed	3.21326e-06	FALSE					Qsox2	3.21891	1.85352e-12	-75	TSS	TRUE
Cd164	17428	8035.1	16330.3	-1.10982	6.76545e-57	Dn	-0.0935342	0.28436	DN_reversed	3.30663e-19	FALSE					Snapc4	4.13919	1.44512e-18	148	TSS	TRUE
Cd2ap	5246.09	2164.85	3618.72	-1.26208	1.76095e-38	Dn	-0.531242	6.41492e-08	DN_reversed	1.56006e-05	TRUE					0610009E02Rik	2.40065	3.41535e-38	903	TSS	TRUE
Cd3eap	3049.43	2143.6	2499.52	-0.50425	4.02885e-10		-0.284691	0.000491745	DN_reversed	6.52994e-09	FALSE					Stkld1	2.48734	4.1052e-19	530	TSS	TRUE
Cd82	110.021	391.965	306.55	1.75236	6.10838e-25	Up	1.41594	4.16199e-17	UP_reversed	2.20118e-09	FALSE					D2Bwg1423e	2.48734	1.07905e-08	-3824	intergenic	TRUE
Cdc14a	587.998	366.62	509.067	-0.670665	1.71008e-07	Dn	-0.206809	0.13002	DN_reversed	0.0032094	TRUE					Rxra	2.63084	2.56378e-17	-701	TSS	TRUE
Cdc14b	845.741	386.121	578.496	-1.10073	2.58234e-16	Dn	-0.53926	3.79242e-05	DN_reversed	0.00231396	TRUE					Gtf3c5	2.28456	2.46716e-30	-1521	TSS	TRUE
Cdc27	8648.98	5410.53	7881.42	-0.668741	5.59555e-12	Dn	-0.133479	0.258308	DN_reversed	0.00020886	FALSE					Gm22675	2.29356	2.31824e-11	-1427	intergenic	TRUE
Cdc37l1	3039.17	1684.41	3033.31	-0.840124	2.44478e-16	Dn	-0.0049666	0.976927	DN_reversed	9.88485e-08	TRUE					Tsc1	2.40349	7.29721e-25	-1337	TSS	TRUE
Cdc42	14079.9	9095.51	12239.6	-0.625299	7.55318e-15	Dn	-0.200149	0.0233825	DN_reversed	0.00139026	TRUE					Ddx31	3.51576	7.36353e-36	40	TSS	TRUE
Cdc42bpb	6123.04	3161.02	4559.76	-0.939282	1.08651e-18	Dn	-0.420316	0.000137962	DN_reversed	0.00596671	TRUE					Barhl1	2.95464	6.28301e-15	-2188	intergenic	TRUE
Cdc7	3604.44	4855.97	3149.84	0.42415	3.36619e-05		-0.193888	0.0867995	UP_reversed	0.00816432	FALSE					Gm13394	2.24046	7.77617e-09	4008	gene_body	TRUE
Cdc73	3340.4	2288.31	3747.7	-0.539563	4.2252e-09		0.162233	0.115104	DN_reversed	6.51999e-08	FALSE					Setx	2.68528	6.43977e-36	2107	TSS	TRUE
Cdca7l	1958.69	1078.44	1184.66	-0.846709	7.49169e-16	Dn	-0.719982	2.25936e-12	DN_reversed	0.0461666	FALSE					Ntng2	3.87703	3.43899e-20	-4275	intergenic	TRUE
Cdh2	7018.5	1823.19	2991.19	-1.92078	1.24496e-99	Dn	-1.21983	2.98404e-43	DN_reversed	4.25474e-06	TRUE					Urm1	2.39699	3.14473e-27	7624	gene_body	TRUE
Cdh26	1804.54	202.286	134.645	-3.1034	2.15798e-133	Dn	-3.66779	8.57493e-197	DN_reversed	0.00103126	FALSE					Gle1	2.8247	5.67675e-36	-226	TSS	TRUE
Cdk12	4544.82	2162.96	3788.41	-1.05911	1.08687e-30	Dn	-0.261191	0.00778814	DN_reversed	1.91667e-08	FALSE					Sptan1	5.34938	1.7771e-24	339	TSS	TRUE
Cdk13	3520.8	2477.84	4116.41	-0.501874	1.05128e-07		0.222278	0.0266395	DN_reversed	3.86223e-07	TRUE					Set	2.96853	4.24361e-36	5221	gene_body	TRUE
Cdk20	306.528	409.483	334.399	0.396115	0.020736		0.121688	0.558626	UP_reversed	0.0418419	FALSE					Set	3.55164	7.97169e-21	9821	gene_body	TRUE
Cdk2ap2	1391.99	3649.83	2956.54	1.36605	5.50277e-32	Up	1.0699	3.78173e-20	UP_reversed	0.00617224	FALSE					Tbc1d13	2.09544	1.04242e-22	753	TSS	TRUE
Cdk5rap3	1101.19	1722.36	1122.52	0.63935	2.4576e-10	Up	0.0322019	0.837916	UP_reversed	9.27466e-05	FALSE					Phyhd1	2.00901	6.13467e-07	-4403	gene_body	TRUE
Cdk6	5609.71	4090.41	4138.1	-0.449442	2.416e-05		-0.434285	4.00583e-05	DN_reversed	0.0466717	TRUE					Gm16323	2.04288	4.50951e-100	-9916	TSS	TRUE
Cdk7	1988.53	1722.98	1876.58	-0.204274	0.0297846		-0.0834998	0.434689	DN_reversed	0.0448617	TRUE					Ier5l	3.01625	7.19357e-86	3418	TSS	TRUE
Cdk8	2878.86	2473.82	4457	-0.215188	0.0170177		0.625286	2.21357e-15	DN_reversed	0.0263799	TRUE					Usp20	2.19811	4.57648e-48	1020	TSS	TRUE
Cdk9	2887.73	5138.53	3569.06	0.823565	1.57263e-22	Up	0.303642	0.000685443	UP_reversed	0.0010994	FALSE					Fubp3	2.10468	4.31476e-31	2948	TSS	TRUE
Cdkl5	922.826	425.75	598.833	-1.08796	3.58582e-15	Dn	-0.61833	4.71787e-06	DN_reversed	9.17991e-05	TRUE					Prdm12	2.10468	6.38298e-40	62	TSS	TRUE
Cdon	1501.23	395.177	411.446	-1.87778	9.05278e-43	Dn	-1.83404	2.7882e-44	DN_reversed	0.0214835	FALSE					Exosc2	2.35979	1.23382e-10	-115	TSS	TRUE
Cdt1	5786.5	14006.7	11338	1.25666	1.32644e-32	Up	0.956801	2.37926e-19	UP_reversed	0.0163329	FALSE					Abl1	2.14329	2.20291e-23	48	TSS	TRUE
Cdv3	8640.54	6467.31	9128.78	-0.414357	5.78782e-08		0.0796262	0.408583	DN_reversed	9.42592e-07	TRUE					Nup214	2.50146	2.4705e-21	363	TSS	TRUE
Celf1	10632.6	7300.1	10867.4	-0.539605	1.6021e-15		0.0309318	0.759485	DN_reversed	1.39532e-12	TRUE					Prrc2b	2.10468	8.88458e-24	2517	TSS	TRUE
Celf2	5255.03	1472.52	2377.15	-1.80787	2.86585e-67	Dn	-1.13166	1.86439e-28	DN_reversed	0.000181566	FALSE					Swi5	2.94655	2.08747e-29	374	TSS	TRUE
Celf4	1123.88	946.224	1389.43	-0.245841	0.0316051		0.298628	0.00421271	DN_reversed	0.0443265	FALSE					Dnm1	3.19096	7.14047e-40	-9662	gene_body	TRUE
Cenpc1	1875.22	994.7	1693.75	-0.906042	6.89745e-20	Dn	-0.146787	0.199088	DN_reversed	2.04994e-05	TRUE					Slc25a25	3.88262	2.86994e-244	-1455	TSS	TRUE
Cenpi	4128.37	2794.61	4202.78	-0.558594	4.37257e-11		0.0234979	0.858325	DN_reversed	0.000226906	TRUE					St6galnac6	2.26468	1.90415e-42	9490	gene_body	TRUE
Cenpt	1517.14	1850.4	1450.39	0.282161	0.00737111		-0.0640266	0.639908	UP_reversed	0.0277557	FALSE					Ak1	2.12755	1.28619e-10	-2558	gene_body	TRUE
Cep170	9078.87	4609.4	7047.11	-0.957261	3.8329e-14	Dn	-0.358861	0.00847433	DN_reversed	0.0233296	TRUE					AL772271.1	2.02951	1.3037e-08	-9909	gene_body	TRUE
Cep192	4559.62	1568.63	2792.19	-1.50631	4.89169e-34	Dn	-0.695729	2.68269e-08	DN_reversed	4.72524e-05	TRUE					Tor2a	2.39575	5.14839e-15	-6934	gene_body	TRUE
Cep290	1331.92	749.189	1152.52	-0.798117	2.14209e-06	Dn	-0.205759	0.306283	DN_reversed	0.0198701	FALSE					Tor2a	2.36466	7.72632e-25	965	TSS	TRUE
Cept1	1764.02	1303.46	2010.13	-0.432004	1.64247e-05		0.184179	0.0854993	DN_reversed	0.000744029	FALSE					Slc2a8	3.40757	2.45252e-62	-18	TSS	TRUE
Cfdp1	8227.27	6714.94	7782.33	-0.290652	0.00063084		-0.0794574	0.450499	DN_reversed	0.0159453	FALSE					Garnl3	3.53968	3.63156e-71	535	TSS	TRUE
Cgnl1	1634.21	1000.43	933.742	-0.690475	8.13685e-07	Dn	-0.793319	6.34025e-09	DN_reversed	0.013962	TRUE					Zbtb43	5.78786	3.0541e-63	331	TSS	TRUE
Chac1	1046.14	5353.64	3411.57	2.32784	1.02766e-139	Up	1.68641	8.36344e-74	UP_reversed	3.18146e-22	TRUE					Pbx3	4.61859	4.1034e-27	1037	gene_body	TRUE
Chaf1a	7845.13	6639.3	7026.44	-0.239835	0.000738717		-0.15782	0.0327497	DN_reversed	0.00728758	FALSE					Pbx3	4.59202	1.24249e-47	-1362	intergenic	TRUE
Chchd5	314.499	667.19	417.082	1.06059	7.15684e-15	Up	0.39975	0.00646283	UP_reversed	6.37273e-06	TRUE					Mapkap1	2.78869	7.51347e-28	-383	TSS	TRUE
Chd1_v1	6250.38	4113.21	9574.22	-0.59716	1.02834e-10		0.608169	2.04239e-11	DN_reversed	7.97791e-10	TRUE					Hspa5	3.51781	3.85042e-56	-370	TSS	TRUE
Chd4	19311.9	9619.32	12409.7	-0.997111	2.2439e-35	Dn	-0.633165	5.2134e-15	DN_reversed	0.00122875	TRUE					Rabepk	2.5364	8.9154e-15	311	TSS	TRUE
Chd9	2324.98	861.073	1503.59	-1.39434	1.11086e-21	Dn	-0.615278	3.38829e-05	DN_reversed	0.00265793	TRUE					Rabepk	3.15701	2.48271e-17	-2488	intergenic	TRUE
Chkb	1434.91	3419.14	2808.19	1.23931	3.35971e-43	Up	0.960759	9.58388e-27	UP_reversed	0.0164814	FALSE					Gm34653	2.22848	2.1827e-09	5320	intergenic	TRUE
Chm	1800.6	695.048	1872.91	-1.33978	1.00628e-23	Dn	0.0514966	0.794055	DN_reversed	5.93174e-10	FALSE					Psmd5	2.38091	6.17387e-24	-538	TSS	TRUE
Chml	2005.8	1320.15	3363.04	-0.591028	2.52443e-06		0.730417	1.13639e-09	DN_reversed	5.32006e-06	TRUE					Cntrl	2.29038	2.82215e-14	-392	TSS	TRUE
Chmp2a	2477.4	4129.05	2835.11	0.727315	9.29491e-14	Up	0.193534	0.0832537	UP_reversed	0.000855524	FALSE					Rab14	3.47916	8.0624e-39	219	TSS	TRUE
Chmp2b	1654.47	1388.91	2070.83	-0.249433	0.0094395		0.322332	0.000250135	DN_reversed	0.0135751	TRUE					Stom	3.00058	9.30806e-41	375	TSS	TRUE
Chmp4c	60.2758	296.089	141.346	2.14805	9.26412e-22	Up	1.13777	1.07241e-06	UP_reversed	0.0168332	FALSE					Ggta1	2.07698	4.43137e-22	-251	TSS	TRUE
Chordc1	5258.49	2524.95	3944.18	-1.04504	5.10404e-25	Dn	-0.411709	8.06732e-05	DN_reversed	2.44801e-08	TRUE					Rbm18	2.38387	2.25896e-15	-327	TSS	TRUE
Chpt1	2182.43	1028.2	1364.23	-1.06741	3.34804e-24	Dn	-0.672358	6.99521e-11	DN_reversed	0.0222217	FALSE					Pdcl	2.00201	4.01752e-08	-168	TSS	TRUE
Chst1	322.234	600.156	610.263	0.882593	6.28858e-11	Up	0.904283	4.85315e-12	UP_reversed	0.0015245	TRUE					Zbtb6	2.4093	1.1846e-12	670	TSS	TRUE
Chsy1	2489.7	1424.19	2792.26	-0.798949	2.05573e-20	Dn	0.163782	0.0837879	DN_reversed	2.52643e-15	TRUE					Gpr21	4.17306	1.00714e-34	9414	gene_body	TRUE
Chtop	9626.24	7316.31	9474.06	-0.39235	4.95086e-06		-0.0222045	0.866857	DN_reversed	0.000539058	FALSE					Dennd1a	2.45545	7.38391e-11	174	TSS	TRUE
Ciart	115.325	289.04	184.997	1.24518	8.68736e-10	Up	0.638406	0.00281071	UP_reversed	0.0265191	FALSE					Psmb7	3.32674	7.52737e-23	286	TSS	TRUE
Cib1	1179.14	2040.85	1470.2	0.781854	1.72427e-16	Up	0.315758	0.00166555	UP_reversed	0.000239904	TRUE					Nr6a1	3.36748	8.95074e-23	1487	gene_body	TRUE
Cirbp	772.816	1605.41	876.063	1.03859	1.50526e-24	Up	0.176289	0.147389	UP_reversed	3.95033e-11	TRUE					Gm13496	2.60845	4.61271e-70	-3242	TSS	TRUE
Cisd2	2306.91	1414.59	1633.15	-0.694915	3.57941e-15	Dn	-0.493132	1.26781e-08	DN_reversed	0.0119861	TRUE					Rpl35	2.93151	1.35412e-22	-2976	gene_body	TRUE
Cisd3	294.58	424.839	284.805	0.507577	0.00273801		-0.0418572	0.867279	UP_reversed	0.0190918	FALSE					Golga1	2.13098	1.69771e-09	540	TSS	TRUE
Cited2	5134.74	8556.4	4397.79	0.729958	4.70975e-17	Up	-0.219444	0.0230809	UP_reversed	0.000559866	TRUE					Scai	3.44933	3.56501e-55	233	TSS	TRUE
Ciz1	1956.11	2732.96	2155.71	0.476951	4.32571e-09		0.138461	0.138315	UP_reversed	0.00722753	FALSE					Ppp6c	2.88641	1.96236e-18	1150	TSS	TRUE
Ckap4	20143.8	8339.81	11028.6	-1.26466	8.10374e-81	Dn	-0.863469	5.66553e-39	DN_reversed	6.83736e-08	FALSE					Gtdc1	5.71269	8.67567e-32	60	TSS	TRUE
Clasp1	3445.34	2724.3	4139.79	-0.334399	0.00016693		0.262038	0.00307273	DN_reversed	0.000458384	TRUE					Zeb2os	2.30776	4.31259e-16	-638	TSS	TRUE
Clasp2	2818.16	1293.76	2475.88	-1.11009	5.6358e-29	Dn	-0.186031	0.0951915	DN_reversed	1.00262e-07	FALSE					Zeb2	2.94655	2.48187e-14	794	TSS	TRUE
Clcn3	1757.61	1144.08	1859.9	-0.610569	2.23732e-09	Dn	0.0780231	0.557859	DN_reversed	0.000659008	FALSE					Mbd5	4.16152	1.21862e-26	-23	TSS	TRUE
Clcn4	2194.72	1066.53	1516.06	-1.03037	3.65284e-33	Dn	-0.530794	1.47727e-10	DN_reversed	0.0015446	FALSE					Epc2	3.36235	2.30411e-30	913	TSS	TRUE
Clcn7	3223.8	4424.47	3431.19	0.4523	2.45774e-08		0.088685	0.386464	UP_reversed	0.000835774	FALSE					Lypd6	2.0696	5.38622e-07	470	TSS	TRUE
Cldn12	6102.84	3131.44	3622.71	-0.952193	6.15394e-24	Dn	-0.745895	1.99746e-15	DN_reversed	2.27499e-05	TRUE					Mmadhc	2.61136	1.49819e-11	416	TSS	TRUE
Cldnd1	2996.62	2500.2	3005.03	-0.259042	0.0020757		0.00345794	0.979017	DN_reversed	0.00590973	TRUE					Rnd3	3.46652	2.92297e-27	910	TSS	TRUE
Clec16a	1902.82	902.925	1190.17	-1.06564	3.67539e-29	Dn	-0.670299	2.39363e-13	DN_reversed	0.00549525	FALSE					A430018G15Rik	3.05679	2.27804e-13	287	TSS	TRUE
Clic1	10708.3	16962.4	15405.9	0.656276	1.42748e-12	Up	0.519332	2.97343e-08	UP_reversed	0.00296004	FALSE					Stam2	2.93311	4.15925e-25	-300	TSS	TRUE
Clic4	9661.48	7072.39	9418.04	-0.445895	4.63442e-08		-0.0367194	0.759636	DN_reversed	0.000258713	TRUE					Fmnl2	2.13391	8.37521e-16	831	TSS	TRUE
Clint1	8691.63	5011.69	7296.03	-0.789877	1.43422e-32	Dn	-0.251741	0.00027072	DN_reversed	4.03702e-13	FALSE					Prpf40a	9.21848	2.39226e-127	-375	TSS	TRUE
Clk2	2935.84	4449.83	2924.58	0.592947	1.90787e-12		-0.00654773	0.963328	UP_reversed	0.00112351	FALSE					Nr4a2	2.42038	3.18865e-19	8102	gene_body	TRUE
Clk3	1465.93	3338.16	3042.18	1.17775	2.61405e-50	Up	1.04584	6.63867e-41	UP_reversed	0.0137798	FALSE					Nr4a2	2.33487	4.35118e-10	-497	TSS	TRUE
Clock	5365.19	2742.22	4914.07	-0.950581	1.36899e-16	Dn	-0.12618	0.3909	DN_reversed	1.72375e-06	TRUE					Gpd2	2.03039	1.01054e-15	-278	TSS	TRUE
Cltc	26012.1	16874.3	26149.4	-0.620833	2.28427e-21	Dn	0.00735234	0.947363	DN_reversed	2.25256e-08	TRUE					Pkp4	2.70411	2.27052e-33	1949	TSS	TRUE
Cluh	15539.1	9480.69	10529.2	-0.706296	1.27165e-17	Dn	-0.556792	1.99445e-11	DN_reversed	0.000107494	FALSE					Tanc1	3.02547	1.40246e-27	855	TSS	TRUE
Cmpk1	6233.24	1828.85	2668.85	-1.75319	3.71709e-90	Dn	-1.21376	1.74699e-46	DN_reversed	1.78845e-05	TRUE					Ly75	2.41648	2.14691e-17	302	TSS	TRUE
Cmtm4	6250.86	3574.53	5093.5	-0.797138	9.59309e-20	Dn	-0.293515	0.00144422	DN_reversed	0.0117234	FALSE					Rbms1	2.66443	8.41122e-20	191	TSS	TRUE
Cnga3	14.7525	95.8754	59.9763	2.27086	7.75741e-12	Up	1.69024	4.85347e-07	UP_reversed	0.00760232	FALSE					Psmd14	3.45167	2.45037e-20	305	TSS	TRUE
Cnn3	15046.9	9526.31	10033.9	-0.653999	7.6404e-16	Dn	-0.579288	9.46569e-13	DN_reversed	0.0187654	FALSE					Ttc21b	2.91785	1.50929e-12	-183	TSS	TRUE
Cnot1	13733.6	7695.1	14485	-0.82358	3.31304e-15	Dn	0.075381	0.607289	DN_reversed	1.95493e-07	FALSE					Stk39	4.30502	1.67541e-28	467	TSS	TRUE
Cnot6	9364.75	3697.21	6557.4	-1.32611	2.70997e-48	Dn	-0.50982	3.56373e-08	DN_reversed	2.01968e-06	FALSE					Cers6	3.49648	3.15196e-49	58	TSS	TRUE
Cnot6l	3089.14	1525.27	3586.09	-1.00968	3.95668e-25	Dn	0.210575	0.0483227	DN_reversed	4.20194e-16	TRUE					Spc25	2.83674	3.14045e-12	-6	TSS	TRUE
Cnot7	2295.27	1460.93	2261.03	-0.648248	1.24654e-13	Dn	-0.0233787	0.861474	DN_reversed	0.00086872	FALSE					Fastkd1	2.17984	1.56545e-10	-794	TSS	TRUE
Cnpy4	1494.05	1251.07	1335.31	-0.255421	0.0169732		-0.161679	0.144989	DN_reversed	0.0245318	FALSE					Ppig	3.06551	2.43082e-27	-405	TSS	TRUE
Cntf	10619.6	6502.03	9495.89	-0.701081	3.01013e-17	Dn	-0.160563	0.0914862	DN_reversed	3.89894e-05	TRUE					Mettl5	2.37388	1.50553e-13	114	TSS	TRUE
Coa3	1834.09	2805.49	1250.82	0.606102	9.80636e-11	Up	-0.541615	1.32768e-08	UP_reversed	1.72004e-08	FALSE					Ubr3	2.37292	9.84061e-16	253	TSS	TRUE
Coa5	5628.07	2993.12	4306.67	-0.903131	1.20372e-28	Dn	-0.384369	3.32607e-06	DN_reversed	6.97677e-08	FALSE					Gorasp2	3.11492	3.04222e-16	-76	TSS	TRUE
Cog3	1902.85	1303.17	1870.56	-0.540255	1.40813e-06		-0.0264165	0.877219	DN_reversed	0.00280248	TRUE					Dcaf17	3.92873	1.13193e-31	318	TSS	TRUE
Col27a1	1257.85	523.368	540.095	-1.23988	1.87974e-24	Dn	-1.20075	6.90107e-25	DN_reversed	0.0303388	FALSE					Dync1i2	4.64267	5.74772e-26	393	TSS	TRUE
Col4a3bp	2768.04	1837.59	3378.99	-0.58353	2.62534e-09		0.282195	0.00529192	DN_reversed	2.63692e-08	TRUE					Hat1	2.73268	2.78189e-27	241	TSS	TRUE
Col5a2	37874.8	6183.89	5994.76	-2.59758	0	Dn	-2.64361	0	DN_reversed	3.60877e-10	FALSE					Dlx1as	2.03138	5.52374e-35	1718	TSS	TRUE
Col5a3	106.243	254.673	413.592	1.2194	2.46703e-11	Up	1.89119	9.60928e-29	UP_reversed	4.41166e-06	FALSE					Dlx1	2.07901	4.80675e-09	7086	gene_body	TRUE
Colec12	4345.39	1221.54	1632.7	-1.80952	2.38075e-90	Dn	-1.40042	3.21912e-59	DN_reversed	2.22192e-05	TRUE					Dlx2	2.70411	3.7314e-65	2953	TSS	TRUE
Colgalt1	8108.69	2435.63	2871.61	-1.72328	2.23544e-113	Dn	-1.48666	3.45273e-89	DN_reversed	5.18561e-05	TRUE					Pdk1	3.06932	1.55054e-28	275	TSS	TRUE
Commd4	1208.58	2074.26	1506.69	0.767643	1.72286e-11	Up	0.315972	0.0100138	UP_reversed	0.000965329	TRUE					Zak	5.89309	1.44571e-24	62	TSS	TRUE
Commd6	306.32	511.782	356.636	0.710438	1.85859e-06	Up	0.20988	0.230788	UP_reversed	0.00759324	FALSE					Cdca7	5.26169	2.59579e-38	240	TSS	TRUE
Comtd1	142.945	331.299	135.809	1.15116	7.12223e-09	Up	-0.0541964	0.865608	UP_reversed	0.00201308	TRUE					Sp3os	8.83212	1.18512e-132	475	TSS	TRUE
Copa	13428.7	10771.1	12684	-0.316379	3.164e-06		-0.0819724	0.319755	DN_reversed	0.0198459	FALSE					Ola1	9.33073	1.36223e-78	-53	TSS	TRUE
Copb1	7865.14	6582.99	8524.94	-0.254366	0.00190107		0.114543	0.212559	DN_reversed	0.0042082	FALSE					Sp9	2.93929	3.01068e-16	-7766	intergenic	TRUE
Coprs	1297.59	1801.78	1320.75	0.467498	7.7844e-07		0.0274657	0.849923	UP_reversed	0.00200733	FALSE					Sp9	2.75612	1.312e-10	2033	gene_body	TRUE
Cops2	11088.7	6698	12587.6	-0.721507	2.72848e-18	Dn	0.180585	0.0516346	DN_reversed	2.00086e-14	FALSE					Sp9	2.57823	9.3887e-16	6333	gene_body	TRUE
Coq6	1010.71	1416.22	1006.71	0.480094	7.76003e-06		-0.00151458	0.993323	UP_reversed	0.0385261	TRUE					Cir1	2.41268	1.44929e-13	-699	TSS	TRUE
Coro1b	6483.15	8612.85	7251.43	0.406755	1.12312e-07		0.161089	0.0575915	UP_reversed	0.000439062	FALSE					Gpr155	4.77937	5.73663e-38	71	TSS	TRUE
Coro1c	10020.4	6019.31	7714.86	-0.731121	3.55132e-30	Dn	-0.374862	6.73449e-09	DN_reversed	0.00292689	TRUE					Wipf1	2.45545	1.35342e-13	433	TSS	TRUE
Cox14	1954.05	2763.66	2004.42	0.495231	1.71135e-06		0.0390839	0.800141	UP_reversed	0.00861888	FALSE					Atf2	3.00226	1.07131e-19	338	TSS	TRUE
Cox17	789.902	1101.41	745.495	0.473792	9.38678e-06		-0.080016	0.574163	UP_reversed	0.000177133	TRUE					Atp5g3	2.10468	2.59538e-07	125	TSS	TRUE
Cox4i1	15719.3	23407	19016.8	0.566328	7.9826e-08		0.271217	0.0169769	UP_reversed	0.0379164	FALSE					Lnpk1	3.0221	1.11119e-22	47	TSS	TRUE
Cox6a1	9243.41	12681.9	9144.11	0.446602	0.00103216		-0.0144382	0.947269	UP_reversed	0.0400407	FALSE					Hoxd11	2.15559	7.56196e-27	-1357	TSS	TRUE
Cox6a2	6.82857	70.5865	50.5974	2.49424	1.13175e-12	Up	2.12303	1.25511e-09	UP_reversed	0.00297302	FALSE					Gm14396	2.29337	1.24047e-37	579	TSS	TRUE
Cox6b1	6026.42	8338.22	5685.04	0.462206	7.96782e-06		-0.0818577	0.552186	UP_reversed	0.00121272	TRUE					Hoxd8	3.47271	2.31413e-24	494	TSS	TRUE
Cox6c	6401.48	9584.88	7082.55	0.57751	1.11856e-11		0.145385	0.144854	UP_reversed	1.17683e-05	FALSE					Hoxd3	2.8993	2.23342e-25	-1727	TSS	TRUE
Cox7a2	4949.36	6877.92	5303.33	0.467059	4.37208e-05		0.0991784	0.502241	UP_reversed	0.00927406	TRUE					Mir10b	2.16845	3.57712e-22	129	TSS	TRUE
Cp	7621.16	1334.77	1186.66	-2.4555	1.41708e-78	Dn	-2.62474	1.42037e-91	DN_reversed	0.00986031	FALSE					Gm14424	2.33113	2.77105e-22	-3984	gene_body	TRUE
Cpd	9685.44	3346.02	5650.7	-1.5132	8.37874e-54	Dn	-0.768739	5.53385e-15	DN_reversed	1.84988e-08	FALSE					Hoxd1	2.30377	5.37707e-11	119	TSS	TRUE
Cpne1	9115.47	5934.01	8912.23	-0.61513	1.96764e-19	Dn	-0.0329222	0.74491	DN_reversed	2.57927e-05	TRUE					Hnrnpa3	8.59409	4.96112e-82	32	TSS	TRUE
Cpne3	3283.15	1311.31	2210.8	-1.29955	1.40579e-29	Dn	-0.56432	1.17724e-06	DN_reversed	0.000632316	TRUE					Nfe2l2	4.37264	1.20976e-74	740	TSS	TRUE
Cpox	2679.07	1764.4	2762.13	-0.595249	8.99965e-13		0.0428809	0.716698	DN_reversed	0.000326022	FALSE					Agps	2.07417	5.80332e-14	222	TSS	TRUE
Cpsf6	8596.4	6148.97	8432.79	-0.480854	5.36522e-11		-0.0284477	0.796231	DN_reversed	1.4232e-07	TRUE					Osbpl6	2.99511	2.13356e-15	361	TSS	TRUE
Crebbp	3119.03	2454.62	3762.17	-0.341661	0.000268896		0.267136	0.00429344	DN_reversed	0.000571217	TRUE					Prkra	2.93311	4.15925e-25	-685	TSS	TRUE
Creld2	3398.07	5249.97	2950.91	0.618069	8.7883e-09	Up	-0.198311	0.107349	UP_reversed	0.0378632	FALSE					Fkbp7	2.68528	3.94271e-13	69	TSS	TRUE
Crim1	6828.05	2937.26	3181.55	-1.20785	9.04924e-55	Dn	-1.09296	8.41957e-47	DN_reversed	1.80131e-13	TRUE					Sestd1	2.17809	1.022e-10	191	TSS	TRUE
Crk	12005	7109.02	11431.4	-0.750889	1.85387e-25	Dn	-0.070776	0.45654	DN_reversed	1.83759e-09	FALSE					Ube2e3	2.36776	1.23113e-12	552	TSS	TRUE
Cryab	3036	10301.5	8330.84	1.74318	1.23703e-86	Up	1.44117	8.98509e-60	UP_reversed	0.00157763	FALSE					Ssfa2	4.01802	2.56272e-36	947	TSS	TRUE
Crybg3_v2	240.494	41.3712	155.589	-1.77846	8.38671e-06	Dn	-0.485416	0.308294	DN_reversed	0.00134464	FALSE					Dnajc10	5.06437	6.56544e-29	233	TSS	TRUE
Csde1	18184	16006.7	20700.3	-0.182853	0.0281843		0.185325	0.0236497	DN_reversed	0.0319667	TRUE					Nckap1	3.77885	6.69985e-22	779	TSS	TRUE
Cse1l	15480	7466.53	12565	-1.04342	5.81569e-41	Dn	-0.299296	0.000262132	DN_reversed	1.31808e-11	TRUE					Gm13690	2.40534	9.68559e-12	-9232	gene_body	TRUE
Csgalnact2	1962.76	1037.86	1834.09	-0.907193	1.03446e-16	Dn	-0.0993827	0.479418	DN_reversed	4.49727e-06	FALSE					Zc3h15	2.25943	9.79466e-10	64	TSS	TRUE
Csnk1a1	13121	9455.93	15180.2	-0.469649	1.28508e-12		0.209227	0.00265593	DN_reversed	9.31898e-07	TRUE					Itgav	2.82026	3.65045e-24	-797	TSS	TRUE
Csnk1g1	2697.05	1753.7	2870.28	-0.613546	8.29882e-11	Dn	0.0869295	0.472026	DN_reversed	6.78809e-05	TRUE					Selenoh	2.05684	4.34023e-13	-630	TSS	TRUE
Cspg4	3839.65	5917.62	5585.53	0.618369	1.05605e-11	Up	0.535793	4.09372e-09	UP_reversed	0.0348561	FALSE					Med19	4.1636	4.07712e-106	-1402	TSS	TRUE
Csrp2	1540.33	2835.44	3242.69	0.866628	4.85341e-15	Up	1.05881	1.999e-22	UP_reversed	0.00624911	TRUE					Zdhhc5	4.71447	1.94318e-38	-120	TSS	TRUE
Cstb	5788.12	12586.3	11211.6	1.10572	1.88106e-28	Up	0.94172	5.59289e-21	UP_reversed	0.0244375	FALSE					Slc43a1	2.17775	8.6043e-17	1149	TSS	TRUE
Cstf2	6141.17	2851.74	3940.65	-1.09579	1.97474e-37	Dn	-0.636032	9.36344e-14	DN_reversed	0.000363412	FALSE					Rtn4rl2	2.40673	1.02616e-32	1009	TSS	TRUE
Ctbp2	2608.42	2062.98	2697.26	-0.336413	0.000174776		0.0492148	0.685868	DN_reversed	0.00313528	TRUE					Nup160	2.872	2.49523e-24	1584	gene_body	TRUE
Ctc1	2642.8	4482.43	3680.85	0.755673	4.68071e-23	Up	0.474535	8.18617e-10	UP_reversed	0.00200766	FALSE					Fnbp4	4.1604	2.47203e-50	-170	TSS	TRUE
Ctcf	6367.54	3039.08	3536.41	-1.06012	3.68338e-44	Dn	-0.843344	1.68928e-29	DN_reversed	0.0353888	FALSE					Mtch2	2.45545	5.45079e-20	-455	TSS	TRUE
Ctdspl	1917.52	980.624	1482.6	-0.958814	1.5338e-26	Dn	-0.368682	3.2082e-05	DN_reversed	9.74807e-08	TRUE					Celf1	3.25567	2.00577e-22	202	TSS	TRUE
Cth	1276.81	2062.48	2232.11	0.682367	2.14e-14	Up	0.793236	6.47005e-20	UP_reversed	0.0189549	TRUE					Lrp4	2.09101	8.91948e-16	1688	TSS	TRUE
Ctnna1	19167.9	16456.2	20014.2	-0.21901	0.00129508		0.0619346	0.463064	DN_reversed	0.0100531	TRUE					Ckap5	3.40462	5.21763e-14	337	TSS	TRUE
Ctnnb1	22989.6	14714.7	20079.9	-0.64026	3.9381e-24	Dn	-0.194383	0.00428048	DN_reversed	2.09308e-05	TRUE					Harbi1	3.70949	7.94564e-37	377	TSS	TRUE
Ctnnd1	11842.7	6579.45	9911.06	-0.837542	3.34584e-18	Dn	-0.254584	0.0155463	DN_reversed	0.0202753	FALSE					Mdk	2.01698	1.70109e-07	996	gene_body	TRUE
Ctns	1641.46	2943.29	2410.9	0.833491	4.59433e-19	Up	0.549063	6.12481e-09	UP_reversed	0.00605598	FALSE					2900072N19Rik	2.13034	1.10315e-09	268	TSS	TRUE
Ctps	17989.3	13583.8	12392.7	-0.403343	4.90413e-10		-0.535171	4.3624e-17	DN_reversed	4.00641e-05	TRUE					Cry2	2.55367	5.23502e-53	2242	TSS	TRUE
Ctsa	5258.8	10809.3	9461.25	1.02971	8.7695e-36	Up	0.840229	2.59884e-24	UP_reversed	0.0118393	FALSE					Slc35c1	2.29299	3.24788e-25	-462	TSS	TRUE
Ctxn1	166.061	283.504	308.664	0.742065	0.000155955	Up	0.867835	3.27135e-06	UP_reversed	0.0475217	TRUE					Chst1	2.13432	1.28769e-15	-7	TSS	TRUE
Cuedc2	4391.63	5968.27	4576.31	0.437582	4.46844e-06		0.0601705	0.649725	UP_reversed	0.000594842	FALSE					Prdm11	2.4939	5.47849e-25	370	TSS	TRUE
Cul1	8944.57	7473.76	8971.85	-0.258174	0.000756697		0.00369214	0.975996	DN_reversed	0.0205744	FALSE					Tspan18	2.12165	1.31545e-13	-1213	TSS	TRUE
Cul2	3699.32	2245.91	3002.46	-0.711621	5.95302e-19	Dn	-0.300105	0.000240207	DN_reversed	0.00807312	TRUE					Hsd17b12	5.32015	9.59945e-103	-36	TSS	TRUE
Cul3	8410.16	6763.75	10854.7	-0.312959	5.80983e-05		0.364965	1.39433e-06	DN_reversed	0.000174322	TRUE					Ttc17	3.45768	7.48758e-28	-411	TSS	TRUE
Cul4b	2860.51	2070	3371.45	-0.462588	1.91565e-06		0.231984	0.0225208	DN_reversed	0.00012813	FALSE					Api5	2.46247	4.52334e-17	1235	TSS	TRUE
Cul5	3677.41	2121.63	3080.39	-0.784432	1.62313e-15	Dn	-0.254791	0.0159761	DN_reversed	0.000778975	FALSE					Traf6	2.51203	8.15005e-12	459	TSS	TRUE
Cuta	3540.78	5893.11	3333.94	0.724117	2.427e-11	Up	-0.0834516	0.577091	UP_reversed	0.000113684	FALSE					Ldlrad3	2.21354	4.03504e-08	-6415	intergenic	TRUE
Cxcl1	1528.01	7698.45	3050.56	2.30195	8.15078e-122	Up	0.981061	1.35049e-22	UP_reversed	6.41563e-17	FALSE					Slc1a2	2.42357	2.18968e-11	140	TSS	TRUE
Cxcl10	349.67	5987.02	2741.78	4.04822	0	Up	2.93359	3.41352e-177	UP_reversed	1.17378e-26	FALSE					Pdhx	3.9755	2.14436e-29	312	TSS	TRUE
Cyb5b	17706.3	7839.92	7968.62	-1.16847	4.20855e-71	Dn	-1.14586	9.11629e-70	DN_reversed	0.000202381	FALSE					Cat	5.94261	5.23341e-41	159	TSS	TRUE
Cyb5d1	383.52	186.226	267.07	-0.997577	6.12931e-08	Dn	-0.516693	0.00459621	DN_reversed	0.0291021	FALSE					Abtb2	3.5993	2.77014e-58	989	TSS	TRUE
Cyb5r4	1118.86	842.433	1265.58	-0.401472	0.000280487		0.173663	0.140235	DN_reversed	0.0472309	TRUE					Caprin1	3.46102	2.2444e-35	148	TSS	TRUE
Cycs	573.184	450.469	647.106	-0.339045	0.0117146		0.169261	0.225055	DN_reversed	0.019459	FALSE					Cstf3	4.82624	2.21563e-46	376	TSS	TRUE
Cyfip1	6441.1	1970.44	2949.23	-1.69695	2.34334e-106	Dn	-1.11957	1.92828e-50	DN_reversed	6.30336e-05	TRUE					Qser1	2.73608	2.82273e-18	-4	TSS	TRUE
Cyp1b1	1769.65	123.61	194.877	-3.71517	2.59678e-128	Dn	-3.12363	2.99929e-121	DN_reversed	2.31248e-05	FALSE					Eif3m	3.93483	8.65596e-25	-220	TSS	TRUE
Cyp3a13	36.7305	198.426	232.692	2.22626	8.47083e-23	Up	2.4518	3.51204e-29	UP_reversed	0.008578	FALSE					Wt1	2.20991	1.6905e-10	370	TSS	TRUE
Cyp4f13	78.6223	231.775	147.065	1.4298	1.5241e-09	Up	0.821825	0.000839428	UP_reversed	0.0020722	FALSE					Rcn1	2.2652	9.49073e-16	-881	TSS	TRUE
Cyr61	9161.52	27963.8	9960.44	1.58991	1.08734e-61	Up	0.119023	0.339257	UP_reversed	2.08419e-05	FALSE					Pax6	2.10468	1.00476e-12	-500	TSS	TRUE
Cyth2	1628.53	5982.08	4875.63	1.8586	5.92722e-102	Up	1.5677	2.05824e-73	UP_reversed	7.22719e-06	FALSE					Pax6os1	3.13855	2.20479e-35	-4070	gene_body	TRUE
D3Ertd254e	1613.47	1162.52	1697.48	-0.463708	0.000538229		0.0679961	0.710945	DN_reversed	0.019599	FALSE					Immp1l	5.10384	3.45759e-36	161	TSS	TRUE
D730003I15Rik	247.436	805.262	538.177	1.65506	2.07562e-32	Up	1.09704	6.22594e-15	UP_reversed	0.000850164	FALSE					Arl14ep	2.2893	9.80306e-16	1723	TSS	TRUE
D8Ertd738e	4432.9	7630.24	5216.1	0.77485	8.42104e-17	Up	0.233484	0.0234365	UP_reversed	0.000183101	FALSE					Gm45346	2.53341	9.65813e-29	590	TSS	TRUE
Dab2ip	1192.91	933.694	1411.58	-0.347744	0.000572308		0.241666	0.0143659	DN_reversed	0.0373238	FALSE					Lgr4	3.00668	1.37316e-16	452	TSS	TRUE
Dalrd3	792.574	972.279	713.687	0.293349	0.0223812		-0.148069	0.299402	UP_reversed	0.0311257	FALSE					Ccdc34	2.56668	6.3997e-16	537	TSS	TRUE
Dbp	115.872	874.146	655.93	2.83762	1.07746e-72	Up	2.43592	1.43642e-54	UP_reversed	0.000100304	FALSE					Nutm1	2.12755	1.28619e-10	7890	gene_body	TRUE
Dbt	2031.61	870.102	980.734	-1.2021	1.08917e-26	Dn	-1.04051	1.61133e-21	DN_reversed	0.0101367	FALSE					Katnbl1	2.10468	6.5918e-16	-111	TSS	TRUE
Dcaf15	3103.16	5402.45	3412.09	0.790214	9.58325e-17	Up	0.136988	0.240362	UP_reversed	7.94929e-05	TRUE					Emc7	3.37625	1.09819e-18	2	TSS	TRUE
Dcbld2	5678.86	2532.24	4205.06	-1.15701	4.5406e-53	Dn	-0.43127	1.06143e-08	DN_reversed	3.1759e-08	TRUE					Grem1	2.24983	1.81878e-08	9045	gene_body	TRUE
Dck	3861.99	2515.85	3311.73	-0.61226	1.79323e-11	Dn	-0.22073	0.0244701	DN_reversed	0.00701752	FALSE					Grem1	2.15911	1.62662e-13	945	TSS	TRUE
Dcp1a	1947.87	1481.59	1762.27	-0.39094	8.68916e-05		-0.145044	0.193503	DN_reversed	0.0116688	TRUE					Scg5	2.07837	7.38566e-09	7820	gene_body	TRUE
Dcp2	3848.11	2312.32	2843.76	-0.725504	5.59752e-13	Dn	-0.433111	2.20154e-05	DN_reversed	2.53329e-05	TRUE					Zfp770	2.70601	3.56162e-10	168	TSS	TRUE
Dcps	1785.29	2469.2	1685.74	0.463763	7.62424e-07		-0.0792634	0.521736	UP_reversed	0.00330868	FALSE					Dph6	3.59549	1.30959e-11	63	TSS	TRUE
Dctn3	1319.18	2407.01	1467.53	0.851717	3.75724e-13	Up	0.154875	0.287433	UP_reversed	0.000101699	TRUE					BC052040	2.65854	5.18437e-09	183	TSS	TRUE
Dcun1d4	1153.44	974.104	1817.14	-0.246442	0.0491348		0.644234	1.42404e-09	DN_reversed	0.0434685	FALSE					Meis2	3.27394	3.32991e-31	3538	gene_body	TRUE
Dcxr	1036.78	1742.16	1044.11	0.742119	1.09278e-15	Up	0.0103898	0.947393	UP_reversed	2.58195e-09	FALSE					Gm29340	4.16888	2.91963e-31	227	TSS	TRUE
Ddah1	6811.83	2856.38	2587.81	-1.24511	1.95497e-58	Dn	-1.38348	2.68863e-74	DN_reversed	2.04994e-05	TRUE					Spred1	2.10468	7.57608e-14	-574	TSS	TRUE
Ddah2	980.778	1458.77	1302.88	0.564842	6.7815e-08		0.406681	0.000113074	UP_reversed	0.0209392	FALSE					Fam98b	3.63535	3.30342e-20	-339	TSS	TRUE
Ddhd1	1509.55	780.51	1086.26	-0.937087	1.98175e-16	Dn	-0.469794	3.43181e-05	DN_reversed	6.18997e-05	TRUE					Gpr176	2.67594	2.36375e-15	-381	TSS	TRUE
Ddi2	5127.59	3944.02	4891.78	-0.373281	0.000251483		-0.068274	0.615172	DN_reversed	0.000423551	TRUE					Eif2ak4	2.56894	1.57199e-13	-118	TSS	TRUE
Ddias	2772.63	1742.83	3227.96	-0.666055	6.30655e-14	Dn	0.215974	0.0216936	DN_reversed	0.000111894	FALSE					Srp14	2.9857	4.01346e-24	-489	TSS	TRUE
Ddit3	1314.75	16799.9	6806.27	3.644	0	Up	2.35077	2.69654e-204	UP_reversed	2.89566e-34	FALSE					Knstrn	2.83043	7.02737e-15	796	TSS	TRUE
Ddt	818.207	1599.93	1065.27	0.955925	5.95451e-20	Up	0.379584	0.000575175	UP_reversed	1.43947e-06	TRUE					Ivd	3.88555	4.55727e-27	-54	TSS	TRUE
Ddx10	2969.16	2210.95	3824.03	-0.422405	8.69561e-06		0.359008	0.000119503	DN_reversed	1.15684e-05	TRUE					Bahd1	2.36776	5.44366e-40	2146	TSS	TRUE
Ddx21	31070.6	21330	32074.6	-0.539797	1.03879e-16		0.0454418	0.621297	DN_reversed	1.62682e-13	FALSE					Rpusd2	2.98162	4.21042e-11	209	TSS	TRUE
Ddx24	6513.37	5633.6	6269.87	-0.208845	0.00430339		-0.0552642	0.546021	DN_reversed	0.0112536	TRUE					Rad51	2.20734	1.1042e-10	-107	TSS	TRUE
Ddx3x	31372.7	15521.4	31302.2	-1.00349	1.10259e-26	Dn	-0.00348832	0.983338	DN_reversed	7.86951e-18	TRUE					Rmdn3	4.64267	5.74772e-26	333	TSS	TRUE
Ddx46	7849.29	5470.17	7294.45	-0.516826	1.1485e-10		-0.105868	0.27796	DN_reversed	0.00123392	FALSE					Gchfr	2.51203	8.15005e-12	-173	TSS	TRUE
Ddx6	10097.8	5040.97	8963.9	-0.989902	1.21304e-24	Dn	-0.170591	0.132646	DN_reversed	4.28313e-06	TRUE					Zfyve19	3.89046	5.95975e-34	-234	TSS	TRUE
Deb1	620.177	1002.16	761.404	0.677602	6.85379e-10	Up	0.29017	0.0132118	UP_reversed	0.0132238	TRUE					Rhov	2.02373	3.60834e-10	1271	TSS	TRUE
Dek	12376.5	7334.12	13727.9	-0.748096	1.95853e-18	Dn	0.147571	0.14091	DN_reversed	4.57049e-13	FALSE					Vps18	2.74634	7.3323e-19	-142	TSS	TRUE
Dennd1b	1216.08	924.136	1199.12	-0.390794	0.00127858		-0.0242503	0.892667	DN_reversed	0.00259304	FALSE					Vps18	2.17643	6.66295e-11	5057	gene_body	TRUE
Dennd4c	3287.65	1140.8	2600.08	-1.42224	1.5363e-10	Dn	-0.3172	0.235368	DN_reversed	0.000135021	TRUE					Gm14207	2.61061	1.29099e-20	-906	TSS	TRUE
Dennd5a	4989.36	4023.29	6013.2	-0.307811	6.29271e-05		0.266907	0.000441176	DN_reversed	0.000663399	FALSE					Chac1	2.48874	3.51032e-45	1870	TSS	TRUE
Dennd6b	343.065	554.589	376.173	0.663472	7.94725e-05	Up	0.128327	0.561024	UP_reversed	0.0219477	TRUE					Ino80	2.62161	1.11896e-22	1186	TSS	TRUE
Desi2	3312.01	2530.47	3929.42	-0.385794	5.91491e-06		0.243097	0.00493148	DN_reversed	0.00056556	TRUE					Exd1	2.16481	4.35851e-16	526	TSS	TRUE
Dgat1	1214.35	1900.98	1337.56	0.637996	2.38216e-11	Up	0.138631	0.227379	UP_reversed	0.00233106	FALSE					1700020I14Rik	4.87082	1.24564e-56	196	TSS	TRUE
Dgcr8	2363.97	1252.6	1608.89	-0.909418	8.37125e-26	Dn	-0.55176	5.7857e-11	DN_reversed	0.000458127	TRUE					Nusap1	4.58276	1.1302e-44	82	TSS	TRUE
Dhcr24	25193.4	2452.33	3081.14	-3.33738	0	Dn	-3.0108	0	DN_reversed	1.49859e-06	FALSE					Rtf1	4.37125	2.22436e-34	-268	TSS	TRUE
Dhrs1	869.412	1206.89	903.519	0.46698	4.24079e-05		0.0592012	0.71271	UP_reversed	0.000299818	FALSE					Rpap1	2.33853	8.08112e-09	103	TSS	TRUE
Dhx15	21032.2	13469.9	21715.6	-0.639137	1.04936e-20	Dn	0.0456473	0.641277	DN_reversed	3.92113e-15	TRUE					Tyro3	2.09152	2.44947e-16	1366	TSS	TRUE
Dhx32	1656.91	1016.48	1191.17	-0.697537	1.57229e-13	Dn	-0.468224	3.94684e-07	DN_reversed	0.0451131	FALSE					Mga	2.51534	4.0573e-15	271	TSS	TRUE
Dhx33	6288.09	4755.2	6836.94	-0.39825	4.4493e-05		0.118554	0.308034	DN_reversed	0.000106367	FALSE					Mapkbp1	2.38968	3.41813e-15	-399	TSS	TRUE
Dhx36	7166.66	4883.18	8046.53	-0.548278	3.53887e-10		0.164382	0.0960538	DN_reversed	1.48995e-06	FALSE					Ehd4	3.2928	2.44833e-22	305	TSS	TRUE
Dhx37	3951.65	3294.85	3291.91	-0.260915	0.00173838		-0.260633	0.00137945	DN_reversed	0.00786036	FALSE					Vps39	2.63084	7.78104e-16	-963	TSS	TRUE
Dhx58os	178.174	346.253	217.669	0.908562	8.69319e-07	Up	0.277672	0.199297	UP_reversed	0.00867291	FALSE					Capn3	2.4473	1.10404e-14	531	TSS	TRUE
Dhx9	24984.4	10780.9	14509.1	-1.19686	7.24066e-34	Dn	-0.774538	7.72511e-15	DN_reversed	0.000712517	TRUE					Zfp106	2.32391	6.51822e-08	6	TSS	TRUE
Dicer1	4653.24	2889.59	4026.81	-0.681184	2.10762e-17	Dn	-0.208224	0.0156861	DN_reversed	5.06261e-06	TRUE					Haus2	2.21663	3.87699e-12	-483	TSS	TRUE
Dido1	5549.46	3926.27	6268.24	-0.492024	4.4144e-06		0.172262	0.158864	DN_reversed	1.01152e-05	FALSE					Stard9	2.815	1.35982e-19	775	TSS	TRUE
Dis3	4250.22	3177.76	3988.05	-0.415941	7.20462e-08		-0.0921318	0.324197	DN_reversed	6.2915e-06	FALSE					Cdan1	5.78786	3.02792e-85	-272	TSS	TRUE
Disp2	11.5508	44.8904	35.0084	1.54734	3.70654e-05	Up	1.27054	0.000695657	UP_reversed	5.99802e-05	FALSE					Ubr1	2.28006	1.49024e-07	214	TSS	TRUE
Dkc1	9587.49	4399.51	6788.53	-1.11531	5.63592e-47	Dn	-0.494978	2.45082e-10	DN_reversed	3.43291e-12	FALSE					Gm44325	2.90445	7.19534e-14	226	TSS	TRUE
Dkk2	24.575	66.9672	159.826	1.27583	3.38425e-05	Up	2.38066	9.89706e-18	UP_reversed	0.0159214	FALSE					Ccndbp1	3.3324	2.95124e-22	-3	TSS	TRUE
Dld	6628.65	4601.94	6393.38	-0.521956	1.46191e-09		-0.0528769	0.664206	DN_reversed	0.0032094	FALSE					Gm23858	2.118	8.67871e-17	-2404	TSS	TRUE
Dlg1	5961.36	5038.07	7542.45	-0.242009	0.00155719		0.336506	3.27944e-06	DN_reversed	0.00441361	FALSE					Tubgcp4	2.62092	3.41237e-21	-268	TSS	TRUE
Dlgap1	12.8118	83.6194	53.521	2.18768	2.14675e-10	Up	1.64532	2.3582e-06	UP_reversed	0.0113516	FALSE					Trp53bp1	5.22121	1.49388e-48	6	TSS	TRUE
Dmxl1	2838.75	1011.03	2248.66	-1.44373	6.85221e-22	Dn	-0.329177	0.0484228	DN_reversed	6.33063e-06	TRUE					Ppip5k1	6.6648	1.57897e-27	-67	TSS	TRUE
Dna2	1735.75	1074.4	1281.79	-0.680686	4.58803e-10	Dn	-0.435663	6.48735e-05	DN_reversed	0.0133781	FALSE					Pdia3	6.41926	4.89292e-55	424	TSS	TRUE
Dnaja2	13422.5	10376.8	14366.3	-0.368756	7.2051e-07		0.0977797	0.273821	DN_reversed	5.35128e-06	TRUE					Hypk	4.10618	8.84516e-58	-112	TSS	TRUE
Dnajb1	5389.29	37288.3	23708.3	2.77497	0	Up	2.12502	6.67817e-246	UP_reversed	6.49903e-06	TRUE					Mageb3	3.89755	3.24126e-28	-8	TSS	TRUE
Dnajc10	6690.67	2870.09	3911.24	-1.21038	1.11716e-45	Dn	-0.768538	9.96333e-20	DN_reversed	0.00395299	TRUE					Spg11	5.19592	2.55516e-30	185	TSS	TRUE
Dnajc13	7857.2	3820.49	6022.49	-1.02358	1.62774e-21	Dn	-0.378901	0.000812395	DN_reversed	0.00786525	FALSE					Sord	3.28457	1.57411e-23	550	TSS	TRUE
Dnajc14	2786.58	1942.18	2788.62	-0.514745	9.66569e-10		0.000336508	0.998721	DN_reversed	0.027684	FALSE					Shf	3.26778	1.6389e-26	-7638	intergenic	TRUE
Dnajc2	4187.37	3475.23	3260.88	-0.265136	0.00205239		-0.358318	1.21522e-05	DN_reversed	0.0334414	FALSE					Spata5l1	2.4993	1.1106e-19	353	TSS	TRUE
Dnajc3	3839.28	2373.49	2745.6	-0.684355	1.18049e-13	Dn	-0.480072	1.9419e-07	DN_reversed	0.0010594	TRUE					Myef2	2.73608	3.28577e-16	-305	TSS	TRUE
Dnajc4	446.195	593.67	427.047	0.400765	0.00365647		-0.0555614	0.772178	UP_reversed	0.0220071	FALSE					Cep152	2.71503	3.01575e-42	-287	TSS	TRUE
Dnase1l1	383.695	1356.06	1015.78	1.78523	5.28337e-59	Up	1.37853	3.15225e-36	UP_reversed	1.00262e-07	FALSE					Eid1	2.93778	9.75699e-14	4	TSS	TRUE
Dnase2a	764.395	1702	1555.96	1.14191	3.06796e-30	Up	1.01296	9.45953e-25	UP_reversed	0.0272888	FALSE					Galk2	4.9986	3.2512e-28	-434	TSS	TRUE
Dnm1l	5783.15	3401.12	5281.12	-0.758373	8.9786e-18	Dn	-0.131244	0.214271	DN_reversed	2.52181e-08	TRUE					Dtwd1	2.56894	1.57199e-13	658	TSS	TRUE
Dnttip1	931.395	1346.24	1017.23	0.525427	5.934e-06		0.131863	0.353504	UP_reversed	0.0102261	FALSE					Gabpb1	3.71241	2.23614e-33	467	TSS	TRUE
Doc2g	404.789	705.22	478.274	0.785835	2.8724e-09	Up	0.242118	0.108045	UP_reversed	0.010158	FALSE					Usp8	2.59037	5.64808e-11	56	TSS	TRUE
Dock11	1425.63	838.918	1270.28	-0.75367	7.67496e-09	Dn	-0.167264	0.27966	DN_reversed	0.0378304	FALSE					Trpm7	3.96174	4.60156e-19	329	TSS	TRUE
Dock8	2883	1665.93	1953.54	-0.781816	1.22118e-13	Dn	-0.555982	1.24326e-07	DN_reversed	1.56164e-05	FALSE					Sppl2a	2.13098	1.69771e-09	-265	TSS	TRUE
Dopey1	2000.2	844.232	1113.2	-1.21331	2.1e-19	Dn	-0.830926	4.58672e-10	DN_reversed	0.041237	FALSE					Ciao1	2.16807	7.56427e-19	815	TSS	TRUE
Dpep1	249.751	497.839	312.077	0.956121	3.54143e-10	Up	0.306015	0.0753058	UP_reversed	0.0338886	FALSE					Gm10766	2.99916	6.98787e-44	1453	TSS	TRUE
Dph3	993.576	1319.09	872.384	0.404179	0.000225064		-0.180843	0.139073	UP_reversed	0.0146198	FALSE					Astl	2.20333	1.12232e-08	-939	gene_body	TRUE
Dpm3	820.241	1150.15	706.39	0.479524	0.000278339		-0.204562	0.171089	UP_reversed	0.000958987	FALSE					Mrps5	2.06357	4.46241e-24	2477	TSS	TRUE
Dpp7	1737.44	7832.35	5235.96	2.15312	4.78694e-168	Up	1.57801	8.25785e-91	UP_reversed	1.43235e-12	FALSE					Bub1	4.10412	1.00489e-23	-35	TSS	TRUE
Dpy19l4	2107.61	914.019	1566.88	-1.17931	3.17749e-19	Dn	-0.422568	0.00200718	DN_reversed	0.00630198	FALSE					Bub1	3.25724	2.3751e-15	-7335	intergenic	TRUE
Dpysl3	7216.17	4282.9	5135.63	-0.747585	3.49708e-26	Dn	-0.488307	4.06434e-12	DN_reversed	0.000113098	FALSE					Bcl2l11	3.73879	6.28717e-112	360	TSS	TRUE
Dr1	3598.68	1424.78	3879.6	-1.32385	3.59392e-49	Dn	0.104894	0.341198	DN_reversed	1.4742e-21	TRUE					Anapc1	2.19618	1.30234e-11	390	TSS	TRUE
Dram2	548.373	445.329	820.387	-0.299364	0.0448023		0.565465	8.04361e-06	DN_reversed	0.0444472	TRUE					Tmem87b	5.61247	2.74878e-101	-118	TSS	TRUE
Drap1	5087.44	6638.54	4899.85	0.379465	0.000409311		-0.0518551	0.732037	UP_reversed	0.00143934	FALSE					Zc3h8	3.73101	2.49962e-21	376	TSS	TRUE
Dse	4696.02	1559.35	2266.49	-1.57703	6.47074e-86	Dn	-1.04362	1.33715e-41	DN_reversed	3.49012e-12	TRUE					Zc3h6	5.20322	4.01291e-66	-702	TSS	TRUE
Dsel	1905.51	521.463	1431.32	-1.832	1.00096e-46	Dn	-0.409611	0.00148365	DN_reversed	1.12384e-09	TRUE					Ttl	2.19	1.33248e-09	957	gene_body	TRUE
Dtx2	977.189	1893.77	1464.62	0.943441	1.07414e-21	Up	0.579955	6.04137e-09	UP_reversed	0.0194563	FALSE					Polr1b	2.25868	2.24746e-11	4	TSS	TRUE
Dtx3	2415.11	3583.15	2583.38	0.561505	1.119e-07		0.0976911	0.479544	UP_reversed	0.00553277	FALSE					Chchd5	2.44142	1.09847e-16	99	TSS	TRUE
Dtx3l	469.971	315.261	662.864	-0.548403	0.000709599		0.480849	0.00147427	DN_reversed	0.0461519	FALSE					Gm14026	2.01143	2.6832e-14	-400	TSS	TRUE
Dtx4	2609.97	1409.42	1487.06	-0.881599	4.73577e-22	Dn	-0.805699	1.24939e-19	DN_reversed	0.00148307	TRUE					Gm4430_v1	2.23714	1.88992e-34	825	TSS	TRUE
Dtymk	4363.47	5540.26	3736.47	0.342628	8.16425e-06		-0.220958	0.00576748	UP_reversed	0.00032935	FALSE					Ckap2l	5.54231	8.40869e-93	111	TSS	TRUE
Dusp1	645.675	6125.54	3294.97	3.21343	5.13431e-266	Up	2.3281	2.92976e-139	UP_reversed	0.0293099	FALSE					Stk35	3.07076	7.81017e-36	1582	TSS	TRUE
Dusp14	1345.3	2524.08	1403.62	0.899161	6.48317e-25	Up	0.0632623	0.612132	UP_reversed	0.032456	FALSE					Snrpb	2.71694	4.80999e-24	902	TSS	TRUE
Dusp5	738.305	3682.93	2618.9	2.28193	1.59239e-97	Up	1.79856	3.19649e-61	UP_reversed	5.22073e-09	FALSE					Idh3b	2.17483	5.72604e-08	146	TSS	TRUE
Dvl3	1400.71	769.645	1247.43	-0.834145	2.02844e-07	Dn	-0.164915	0.409058	DN_reversed	0.00771109	TRUE					Pced1a	2.165	5.09451e-34	1547	TSS	TRUE
Dxo	770.913	1486.8	904.959	0.931286	2.85776e-17	Up	0.231192	0.0659471	UP_reversed	0.00696732	TRUE					Ptpra	2.07279	2.11077e-13	1021	TSS	TRUE
Dync1li2	7063.45	6046.26	7604.65	-0.222413	0.00716565		0.104743	0.258308	DN_reversed	0.0227673	FALSE					Fastkd5	3.15701	9.50921e-14	337	TSS	TRUE
Dynll1	6561.63	9109.74	7049.45	0.469106	8.75192e-08		0.103279	0.343555	UP_reversed	0.0263993	TRUE					Lzts3	2.22061	4.44617e-28	5902	gene_body	TRUE
Dynll2	12863.7	10793.6	10905.9	-0.25093	0.00241941		-0.235625	0.00430867	DN_reversed	0.00888684	FALSE					Lzts3	2.7237	1.45614e-22	502	TSS	TRUE
Dynlrb1	3687.09	5343.54	3048.41	0.525628	9.66091e-06		-0.268115	0.0373011	UP_reversed	6.24256e-05	TRUE					Ddrgk1	2.03384	5.74954e-19	1658	TSS	TRUE
Dynlt3	3233.97	1346.81	1805.81	-1.25039	1.08508e-47	Dn	-0.835399	1.12685e-23	DN_reversed	0.000264749	FALSE					4930402H24Rik	2.07584	1.03529e-14	-1466	TSS	TRUE
Dyrk1b	146.822	290.257	257.713	0.941653	4.59565e-07	Up	0.775838	2.61231e-05	UP_reversed	0.0367307	TRUE					Pank2	2.84671	1.3142e-37	399	TSS	TRUE
Dzank1	15.1588	42.8514	36.4808	1.12916	0.00455219	Up	0.955481	0.016022	UP_reversed	0.0350285	TRUE					Rnf24	3.30735	1.50896e-20	280	TSS	TRUE
Dzip1l	1901.57	1528.21	2125.71	-0.308349	0.00329681		0.156636	0.163918	DN_reversed	0.0056283	TRUE					Smox	2.84288	1.96332e-32	1535	TSS	TRUE
Dzip3	2495.83	565.124	1157.26	-2.0902	1.69719e-54	Dn	-1.08949	5.55147e-17	DN_reversed	3.80567e-05	TRUE					Rassf2	3.06135	3.82507e-26	200	TSS	TRUE
E2f1	3742.1	5399.86	2091.31	0.525524	4.0723e-12		-0.831662	3.35071e-28	UP_reversed	0.000180788	TRUE					Tmem230	2.22494	1.42646e-09	806	TSS	TRUE
E2f3	3164.9	2336.13	3173.86	-0.433629	2.90172e-08		0.00502927	0.968319	DN_reversed	8.71819e-07	TRUE					Pcna	5.14792	1.55555e-66	813	TSS	TRUE
E2f7	3468.81	2743.53	4035.05	-0.336048	5.93229e-05		0.216424	0.0110916	DN_reversed	0.000133322	FALSE					Cds2	3.92235	1.55112e-34	151	TSS	TRUE
E2f8	1889.99	1350.66	1608.59	-0.4779	7.08721e-07		-0.231393	0.0211977	DN_reversed	0.000817322	TRUE					Prokr2	2.17483	5.72604e-08	4126	gene_body	TRUE
E330009J07Rik	971.054	611.702	797.881	-0.641436	0.000320265	Dn	-0.277573	0.158813	DN_reversed	0.0457249	TRUE					Trmt6	2.76414	1.29153e-33	654	TSS	TRUE
Eapp	831.025	1363.07	877.706	0.701528	2.24235e-10	Up	0.0732461	0.63899	UP_reversed	1.68533e-05	TRUE					Tmx4	3.1933	1.26853e-19	244	TSS	TRUE
Ebf1	1027.13	753.574	1101.91	-0.441889	0.000109241		0.0980244	0.479418	DN_reversed	0.000315643	TRUE					Mkks	3.46501	1.79301e-32	588	TSS	TRUE
Ebf3	1762.37	1105.27	1255.77	-0.663654	1.68496e-12	Dn	-0.48268	1.49072e-07	DN_reversed	6.44631e-05	TRUE					Jag1	4.1576	1.29587e-70	443	TSS	TRUE
Ebna1bp2	13274.5	11399.1	11614.8	-0.217671	0.0114607		-0.190609	0.0280177	DN_reversed	0.0314893	FALSE					Btbd3	2.94655	8.00425e-12	-70	TSS	TRUE
Echdc3	266.208	363.364	213.528	0.433084	0.0109686		-0.316371	0.0749952	UP_reversed	0.0220888	FALSE					Ism1	2.08076	1.3298e-09	421	TSS	TRUE
Eci1	1692	2289.62	1656.64	0.433	4.28941e-06		-0.026212	0.856683	UP_reversed	0.0144037	TRUE					Tasp1	2.07623	2.68403e-08	504	TSS	TRUE
Ect2	8649.02	2180.66	4327.19	-1.96546	7.84345e-106	Dn	-0.990406	4.15161e-29	DN_reversed	9.59747e-12	FALSE					Ndufaf5	2.10468	2.70493e-10	350	TSS	TRUE
Edem3	2311.05	968.083	1888.49	-1.22173	1.23812e-18	Dn	-0.287243	0.0625454	DN_reversed	0.000147252	TRUE					Macrod2	4.50167	8.3013e-26	490	TSS	TRUE
Edf1	4466.2	5966.63	3880.31	0.414087	4.63325e-05		-0.198126	0.0763162	UP_reversed	0.000440866	FALSE					Kif16bos	2.20034	3.06877e-11	-665	TSS	TRUE
Eea1	6659.32	3940.69	7015.15	-0.744539	8.49511e-11	Dn	0.0729877	0.652494	DN_reversed	2.04649e-06	TRUE					Snrpb2	3.98781	2.28896e-21	460	TSS	TRUE
Efcab14	4992.08	1892.61	2840.82	-1.38396	3.56341e-58	Dn	-0.807854	9.56955e-22	DN_reversed	0.000555939	TRUE					Dstn	3.39416	1.84649e-52	-320	TSS	TRUE
Efhd2	3248.2	2763.46	3210.47	-0.229799	0.0230531		-0.0141396	0.924709	DN_reversed	0.0299815	TRUE					Rrbp1	6.42289	9.19519e-157	-137	TSS	TRUE
Efna1	722.604	2408.55	2521.82	1.70735	5.91793e-55	Up	1.77593	8.50904e-61	UP_reversed	0.0218847	FALSE					Snx5	2.39871	4.97305e-21	-94	TSS	TRUE
Efnb2	5918.77	3360.1	5216.18	-0.810769	9.53007e-27	Dn	-0.181556	0.0285908	DN_reversed	9.23361e-09	TRUE					Csrp2bp	2.38161	2.81297e-12	-83	TSS	TRUE
Efr3a	7933.11	3725.07	4981.07	-1.07715	3.75714e-28	Dn	-0.664566	1.4973e-11	DN_reversed	0.00606095	TRUE					Dzank1	2.32391	4.36823e-14	13	TSS	TRUE
Ehd2	8421.2	3680.31	4013.92	-1.18563	3.26371e-57	Dn	-1.06163	1.1869e-47	DN_reversed	0.00221944	FALSE					Sec23b	3.31486	2.87425e-15	-256	TSS	TRUE
Ehmt1	3919.42	2333.14	2965.93	-0.741704	4.26653e-18	Dn	-0.400267	3.39781e-06	DN_reversed	0.0100245	TRUE					Dtd1	2.2216	9.41412e-08	402	TSS	TRUE
Eid1	5349.82	1261.08	2023.98	-2.05426	5.01253e-94	Dn	-1.38501	1.97902e-46	DN_reversed	4.22633e-08	TRUE					Naa20	3.46652	1.53282e-14	-241	TSS	TRUE
Eif1	7635.66	27606.5	19984.2	1.82	3.15326e-55	Up	1.36268	2.19746e-31	UP_reversed	0.00395299	TRUE					Cfap61	3.52843	4.41201e-15	-314	TSS	TRUE
Eif1a	7790.48	5935.96	10655.5	-0.38997	8.46849e-07		0.448053	6.52249e-09	DN_reversed	1.47854e-06	FALSE					Insm1	2.51392	1.8174e-13	278	TSS	TRUE
Eif1ax	17694.3	12044.6	15240.4	-0.551321	4.27899e-15		-0.214002	0.00437092	DN_reversed	4.7776e-06	TRUE					Ralgapa2	3.2928	2.44833e-22	403	TSS	TRUE
Eif1-ps1	257.74	928.75	627.881	1.79305	2.55078e-31	Up	1.25272	6.66225e-16	UP_reversed	0.0240687	FALSE					Gm14114	3.19749	7.86928e-18	4331	gene_body	TRUE
Eif2ak1	2881.42	2487.67	2767.32	-0.209893	0.0105766		-0.05803	0.565068	DN_reversed	0.0214993	TRUE					Kiz	3.9755	3.23337e-20	335	TSS	TRUE
Eif2b2	1822.38	4469.07	3071.72	1.28069	3.37578e-52	Up	0.746983	1.76231e-18	UP_reversed	0.000214147	FALSE					Xrn2	3.6481	4.32045e-27	103	TSS	TRUE
Eif2s3x	1756.53	960.826	1136.8	-0.860833	5.88484e-18	Dn	-0.61946	1.66272e-10	DN_reversed	0.0208218	FALSE					Nxt1	6.68986	1.46643e-122	298	TSS	TRUE
Eif3j2	3002.92	2413.42	3753.93	-0.313575	0.00029519		0.319278	0.000128071	DN_reversed	0.000750171	FALSE					Gzf1	3.45298	1.5224e-25	376	TSS	TRUE
Eif3k	6816.74	11079.4	5550.84	0.690874	2.61454e-11	Up	-0.291285	0.0092955	UP_reversed	0.00023527	FALSE					Zfp120	7.36636	7.39603e-77	307	TSS	TRUE
Eif3s6-ps1	165.178	366.598	254.396	1.10239	6.17372e-10	Up	0.607076	0.00102509	UP_reversed	0.0235756	FALSE					Gm14139	8.9927	9.43041e-55	-355	TSS	TRUE
Eif3s6-ps2	1362.96	955.938	1563.26	-0.506602	1.89152e-05		0.190121	0.14303	DN_reversed	0.000794633	FALSE					Gm14124	15.7851	4.07832e-49	-217	TSS	TRUE
Eif4e	6952.61	4511.49	6721.25	-0.620195	4.08018e-16	Dn	-0.0487525	0.651081	DN_reversed	1.48708e-07	FALSE					Gm14125	6.08017	3.90446e-45	5738	gene_body	TRUE
Eif4ebp1	5953	13278.8	10346.7	1.13741	3.8272e-23	Up	0.784332	1.58675e-11	UP_reversed	1.47204e-05	TRUE					Zfp442	10.7338	3.70322e-34	185	TSS	TRUE
Eif4ebp2	3932.04	2076.81	3231.67	-0.912909	8.0241e-27	Dn	-0.279901	0.00158336	DN_reversed	3.18355e-10	FALSE					Zfp345	4.29704	8.22369e-31	-409	TSS	TRUE
Eif4enif1	6526.93	5448.92	7558.5	-0.257875	0.0010188		0.209723	0.00781746	DN_reversed	0.00272926	FALSE					Pygb	2.11929	1.7649e-15	1264	TSS	TRUE
Eif4g1	51414	22501.4	27011.7	-1.18506	1.13618e-71	Dn	-0.92336	3.54369e-44	DN_reversed	6.89244e-06	FALSE					Abhd12	4.49267	2.65506e-36	340	TSS	TRUE
Eif4g2	61872.1	37900	66834.9	-0.701946	7.19568e-21	Dn	0.110354	0.229207	DN_reversed	1.87891e-10	TRUE					Gins1	4.07209	1.41066e-26	505	TSS	TRUE
Eif4h	29005.6	20277.9	22137.2	-0.512789	7.91936e-12		-0.386841	3.53514e-07	DN_reversed	0.00476581	TRUE					Gm14141	2.14439	2.99177e-12	6417	gene_body	TRUE
Eif5a2	1013.49	553.383	1161.37	-0.854675	2.34164e-12	Dn	0.188838	0.161115	DN_reversed	3.66056e-09	FALSE					Nsfl1c	2.38968	3.41813e-15	-82	TSS	TRUE
Eif5b	9187.49	6494.63	11294.6	-0.495457	1.40446e-07		0.293988	0.00261658	DN_reversed	6.07292e-08	FALSE					Psmf1	2.23622	7.67585e-11	2385	gene_body	TRUE
Elavl1	6738.73	4968.08	6316.2	-0.435949	5.60959e-06		-0.0920215	0.450465	DN_reversed	2.24485e-05	FALSE					Csnk2a1	2.62053	1.88135e-20	-439	TSS	TRUE
Eldr	343.735	449.625	273.676	0.373341	0.0190576		-0.319639	0.0475672	UP_reversed	0.0394663	FALSE					Rbck1	2.19618	1.43516e-16	552	TSS	TRUE
Ell2	1057.04	784.488	1206.41	-0.424904	5.88532e-05		0.189309	0.0849391	DN_reversed	0.000180651	TRUE					Sox12	2.50206	8.37018e-48	1662	TSS	TRUE
Elmod2	781.836	466.903	703.634	-0.732648	5.60535e-09	Dn	-0.153865	0.287543	DN_reversed	0.0155238	TRUE					Sox12	2.07544	5.92599e-21	-6137	intergenic	TRUE
Elmsan1	1914.45	1286.9	1599.09	-0.561651	1.32135e-06		-0.256644	0.0380163	DN_reversed	0.0312992	TRUE					Zcchc3	2.57071	4.55354e-26	626	TSS	TRUE
Elovl5	4968.2	2617.99	3446.51	-0.915847	2.62031e-28	Dn	-0.523219	2.61413e-10	DN_reversed	2.02406e-09	TRUE					Id1	2.11043	2.72106e-36	3048	TSS	TRUE
Elovl6	8450.85	1232.14	1759.67	-2.74987	4.38311e-221	Dn	-2.24622	3.41795e-162	DN_reversed	0.000442737	FALSE					Bcl2l1	2.78604	3.27101e-62	4027	TSS	TRUE
Emilin2	1321.4	465.707	588.614	-1.47597	9.45411e-34	Dn	-1.13926	6.89939e-23	DN_reversed	0.0194615	FALSE					Pdrg1	2.48734	1.2304e-15	726	TSS	TRUE
Eml4	4283.67	1918.41	2139.65	-1.14702	4.24016e-37	Dn	-0.994334	2.10135e-29	DN_reversed	1.18766e-07	FALSE					Asxl1	2.815	1.35982e-19	254	TSS	TRUE
Emp1	56621	26568.8	41443.6	-1.08597	3.31559e-69	Dn	-0.448012	1.20022e-12	DN_reversed	3.85498e-08	FALSE					Nol4l	2.95657	2.03089e-12	4270	gene_body	TRUE
Emsy	2387.24	1850.97	2505.37	-0.364182	0.00069195		0.066098	0.641277	DN_reversed	0.0197142	TRUE					Commd7	2.30619	1.52421e-13	-619	TSS	TRUE
Emx2	427.523	334.511	516.612	-0.343001	0.0338479		0.266856	0.083926	DN_reversed	0.0376915	FALSE					Mapre1	2.56221	1.43006e-17	725	TSS	TRUE
Enah	4188.81	2964.47	3573.19	-0.496417	1.55999e-08		-0.228056	0.0140924	DN_reversed	0.000744671	FALSE					Snta1	2.28006	6.53102e-12	3398	gene_body	TRUE
Enc1	4316.67	5913.3	4669.27	0.45108	4.09504e-08		0.111627	0.260552	UP_reversed	0.0191098	TRUE					Cbfa2t2	3.12134	4.30121e-36	218	TSS	TRUE
Enho	18.8044	41.9967	29.62	0.867011	0.0405934		0.50391	0.272084	UP_reversed	0.0491793	FALSE					E2f1	2.62092	1.09792e-40	991	TSS	TRUE
Enoph1	2598.75	2091.07	2330.45	-0.311929	0.00125978		-0.153881	0.14271	DN_reversed	0.00293201	TRUE					Pxmp4	2.86141	3.04051e-43	-1292	TSS	TRUE
Ensa	6162.9	5067.58	8024.98	-0.279998	0.000902365		0.378513	2.49393e-06	DN_reversed	0.0017871	TRUE					4930519P11Rik	2.61136	2.34163e-21	-1363	TSS	TRUE
Entpd5	644.028	196.147	295.016	-1.66965	2.43529e-31	Dn	-1.10565	1.31944e-17	DN_reversed	0.0245028	FALSE					a	3.79593	1.67984e-53	-102	TSS	TRUE
Entpd7	851.528	582.335	784.822	-0.541804	1.62976e-05		-0.120522	0.42514	DN_reversed	0.0377649	TRUE					Eif2s2	2.75043	3.44004e-20	1234	TSS	TRUE
Ep300	4836.83	2983.47	4908.46	-0.685418	8.05645e-10	Dn	0.0197684	0.912669	DN_reversed	4.11444e-05	TRUE					Gm45609	8.31347	6.05343e-44	18	TSS	TRUE
Epb41l4aos	542.814	2722.95	1762.56	2.27752	1.94763e-70	Up	1.66478	3.79257e-38	UP_reversed	0.000806511	TRUE					Dynlrb1	5.97919	4.01904e-53	564	TSS	TRUE
Epc1	1194.08	2591.33	1689.58	1.10879	5.30033e-40	Up	0.49563	8.21312e-09	UP_reversed	0.000176854	TRUE					Map1lc3a	2.14138	9.48296e-19	1202	TSS	TRUE
Ephb2	2096.37	1470.47	1765.37	-0.506196	6.02582e-09		-0.246895	0.00565919	DN_reversed	0.000657344	TRUE					Trp53inp2	2.11129	8.69675e-32	785	TSS	TRUE
Ephb4	3929.84	2996.92	3801.24	-0.388094	1.68127e-06		-0.0462798	0.681279	DN_reversed	0.00652035	FALSE					Acss2	2.31138	6.56733e-16	42	TSS	TRUE
Epo	16706.3	20843.4	15743.7	0.314842	0.0048466		-0.0839065	0.554713	UP_reversed	0.0414728	FALSE					Edem2	2.45545	1.35342e-13	74	TSS	TRUE
Eps15	9161.21	7011.34	8849.91	-0.382759	2.79585e-06		-0.0501568	0.658591	DN_reversed	0.000435635	FALSE					Mmp24	2.44414	4.92968e-11	-1342	intergenic	TRUE
Eps8	8955.93	6127.34	8749.64	-0.544278	1.39485e-16		-0.0337296	0.727383	DN_reversed	2.78329e-07	FALSE					Eif6	2.99757	4.24479e-19	-275	TSS	TRUE
Eral1	1581.38	2568.97	1765.29	0.695668	9.6414e-18	Up	0.158671	0.0887742	UP_reversed	0.0197455	FALSE					Cep250	4.91091	1.79114e-30	-58	TSS	TRUE
Erbb3	701.966	442.961	764.571	-0.650642	2.03461e-07	Dn	0.117346	0.430468	DN_reversed	0.00184786	FALSE					Ergic3	2.62383	2.32306e-29	1354	TSS	TRUE
Erbin	6679.96	3469.95	8028.09	-0.927466	9.96345e-15	Dn	0.259499	0.0528035	DN_reversed	9.17936e-10	TRUE					Cpne1	3.20277	4.87248e-16	442	TSS	TRUE
Erc1	2588.67	1118.46	2010.99	-1.18827	1.7632e-24	Dn	-0.361119	0.00298601	DN_reversed	1.96841e-06	TRUE					Romo1	2.10468	1.16647e-13	-839	TSS	TRUE
Ercc1	1571.04	4666.81	4093.07	1.55081	9.93324e-60	Up	1.36527	4.87604e-47	UP_reversed	0.0403771	TRUE					Rbm39	2.81703	8.38645e-31	-162	TSS	TRUE
Erdr1	609.699	1838.77	1046.45	1.44832	2.89962e-08	Up	0.708525	0.0113694	UP_reversed	0.0486455	FALSE					Phf20	4.82624	2.21563e-46	157	TSS	TRUE
Ergic1	14764.6	5372.38	5041.54	-1.44992	3.68279e-110	Dn	-1.54089	1.59358e-127	DN_reversed	0.0067016	FALSE					Cnbd2	2.93547	1.12333e-20	-499	TSS	TRUE
Ergic2	2808.94	1582.9	1883.79	-0.819111	1.59675e-20	Dn	-0.573877	3.43958e-11	DN_reversed	2.60674e-08	TRUE					Gm14225	2.10468	3.15515e-11	6207	gene_body	TRUE
Ergic3	3026.44	3807.32	2984.94	0.325386	0.00227097		-0.0181977	0.911881	UP_reversed	0.0102382	TRUE					4930405A21Rik	2.00408	3.89782e-23	-2691	TSS	TRUE
Erlin1	5365.93	3405.36	3262.16	-0.649968	8.72373e-15	Dn	-0.713503	4.98357e-18	DN_reversed	4.23514e-06	FALSE					Ndrg3	2.84521	3.8127e-14	155	TSS	TRUE
Erlin2	2859.32	1017	1390.98	-1.47315	5.27413e-59	Dn	-1.03237	1.56704e-32	DN_reversed	0.00469255	FALSE					Dsn1	2.45545	2.01803e-15	153	TSS	TRUE
Ermard_v3	197.639	312.412	210.979	0.632899	0.000233539	Up	0.0942302	0.691664	UP_reversed	0.0265792	FALSE					Rbl1	2.25774	1.1684e-14	-788	TSS	TRUE
Errfi1	1375.34	5093.19	3509.99	1.86562	1.47867e-83	Up	1.33355	2.84167e-43	UP_reversed	1.93057e-09	FALSE					Rpn2	10.1866	5.54528e-150	240	TSS	TRUE
Esco1	901.625	710.46	1523.72	-0.339347	0.010936		0.737459	2.40086e-10	DN_reversed	0.0137204	TRUE					Manbal	2.25501	1.46901e-11	105	TSS	TRUE
Esyt1	1958.89	3140.21	3485.5	0.674144	8.71593e-16	Up	0.824832	6.564e-24	UP_reversed	0.000134726	FALSE					Blcap	2.00678	1.70718e-08	-9526	intergenic	TRUE
Esyt2	3688.91	2572.63	4075.24	-0.513301	2.33956e-09		0.141352	0.148464	DN_reversed	0.00643418	TRUE					Ctnnbl1	3.7358	1.31062e-19	498	TSS	TRUE
Etaa1	2466.32	1718.81	2893.08	-0.515415	5.98117e-08		0.226271	0.0233398	DN_reversed	5.05657e-07	FALSE					Tti1	2.38701	1.14141e-24	1132	TSS	TRUE
Etf1	15508.7	12730.7	20581.9	-0.283377	3.10749e-05		0.405981	6.13135e-10	DN_reversed	0.000130762	TRUE					Actr5	2.68096	3.69606e-18	611	TSS	TRUE
Etfbkmt	283.081	755.513	774.996	1.37888	4.98811e-23	Up	1.41257	3.89826e-25	UP_reversed	0.0355938	FALSE					Fam83d	2.50474	8.26405e-41	2306	TSS	TRUE
Etnk1	5319.99	2204.7	4022.42	-1.2588	5.61444e-47	Dn	-0.401069	6.45734e-06	DN_reversed	1.04791e-06	TRUE					Dhx35	2.31819	2.27852e-19	-1507	TSS	TRUE
Etv6	1811.42	1470.31	1875.9	-0.295243	0.00299921		0.052032	0.692096	DN_reversed	0.0144554	TRUE					Gm14222	2.16481	6.76168e-09	8742	gene_body	TRUE
EU599041	308.567	174.048	316.462	-0.804382	1.05072e-05	Dn	0.0297262	0.911799	DN_reversed	0.000969367	FALSE					Top1	2.41881	3.14257e-21	-688	TSS	TRUE
Evi5	3328.69	1716.19	3355.66	-0.945685	5.18995e-25	Dn	0.00931786	0.951421	DN_reversed	7.88876e-09	FALSE					Zhx3	2.52561	7.28758e-25	297	TSS	TRUE
Exo1	4107.84	3480.6	4484.11	-0.237302	0.00206289		0.125029	0.12952	DN_reversed	0.00581309	TRUE					Gm45447	2.59836	9.12683e-31	588	TSS	TRUE
Exoc2	1666.72	1061.9	1483.12	-0.641955	2.98227e-11	Dn	-0.168957	0.113517	DN_reversed	0.0461815	FALSE					Srsf6	2.75111	4.11513e-31	-428	TSS	TRUE
Exoc3l4	69.4936	158.82	98.3569	1.10368	1.80987e-05	Up	0.488448	0.0860801	UP_reversed	0.0377649	FALSE					Tox2	2.03992	1.35689e-12	1274	TSS	TRUE
Exoc5	5258.28	2709.38	5403.57	-0.94359	2.29727e-21	Dn	0.0373137	0.805449	DN_reversed	3.49424e-16	FALSE					2310001K24Rik	2.13656	3.48316e-21	-1457	TSS	TRUE
Exoc8	1403.36	922.992	1061.22	-0.589466	1.88678e-08		-0.400208	0.00011155	DN_reversed	0.0320281	FALSE					Serinc3	3.48933	1.06566e-30	-69	TSS	TRUE
Ext1	5179.97	3548.67	5338.11	-0.542435	1.73706e-14		0.0438693	0.658408	DN_reversed	5.93404e-06	FALSE					Gm16316	2.37451	1.86352e-12	-221	TSS	TRUE
Extl3	2497.75	1734.73	2225.42	-0.519453	6.87426e-09		-0.165489	0.0946538	DN_reversed	0.0120415	FALSE					Kcnk15	2.05334	9.87419e-09	866	TSS	TRUE
Eya1	1105.05	656.637	675.147	-0.742698	2.3355e-10	Dn	-0.699874	6.14802e-10	DN_reversed	0.000223959	FALSE					Stk4	2.68722	7.24353e-46	-738	TSS	TRUE
Eya3	2161.08	1724.42	2072.91	-0.320132	0.000178841		-0.0594436	0.588522	DN_reversed	0.027635	TRUE					Pigt	2.58469	7.39021e-22	-120	TSS	TRUE
F2r	6255.95	4034.91	4592.89	-0.62893	2.63758e-17	Dn	-0.444215	2.17412e-09	DN_reversed	4.97801e-06	TRUE					Gm11457	4.16767	1.36183e-116	-34	TSS	TRUE
F3	2108.89	4787.45	2567.48	1.16633	1.60543e-30	Up	0.278704	0.0133282	UP_reversed	6.8049e-06	TRUE					Snx21	2.21977	2.76645e-30	-991	TSS	TRUE
Fam102b	4026.76	2998.46	4890.51	-0.420409	4.67395e-05		0.275533	0.00937713	DN_reversed	0.000105115	FALSE					Acot8	5.33032	9.2383e-175	81	TSS	TRUE
Fam109b	3603.83	4603.29	3023.14	0.349144	0.00181017		-0.247339	0.0340486	UP_reversed	0.00975516	FALSE					Neurl2	2.00165	3.82014e-24	-2844	TSS	TRUE
Fam110a	731.01	1789.18	973.622	1.26325	3.91299e-25	Up	0.407487	0.00194071	UP_reversed	3.10395e-06	FALSE					Pcif1	2.95333	4.0916e-33	734	TSS	TRUE
Fam114a1	4217.05	1894.61	2179.84	-1.14479	3.0246e-41	Dn	-0.944994	6.01446e-30	DN_reversed	0.00086115	FALSE					Ncoa5	2.66008	1.63437e-15	666	TSS	TRUE
Fam117b	1431.27	899.702	1675	-0.662211	9.32352e-11	Dn	0.224894	0.0353584	DN_reversed	2.84413e-06	TRUE					Sulf2	4.03396	3.9531e-27	462	TSS	TRUE
Fam120a	17138.9	6322.67	10991	-1.43083	2.84511e-108	Dn	-0.637938	5.01486e-23	DN_reversed	4.64424e-18	TRUE					Cse1l	2.43353	3.40302e-30	-959	TSS	TRUE
Fam122b	767.456	247.406	538.132	-1.59036	9.68083e-33	Dn	-0.509021	3.79413e-05	DN_reversed	3.60113e-08	FALSE					Stau1	2.66982	1.30987e-22	-622	TSS	TRUE
Fam126a	4910.17	2609.56	4197.66	-0.897658	1.16901e-16	Dn	-0.22453	0.0652224	DN_reversed	0.000450776	TRUE					Ptgis	2.10468	9.82751e-10	988	TSS	TRUE
Fam131b	2049.23	607.054	780.736	-1.72499	2.46252e-51	Dn	-1.37389	2.72919e-36	DN_reversed	2.37822e-05	FALSE					Slc9a8	2.08444	1.61446e-20	787	TSS	TRUE
Fam134a	3336.74	7167.25	6203.27	1.09317	2.71295e-41	Up	0.888031	7.41893e-28	UP_reversed	0.0496498	FALSE					Rnf114	2.34384	3.48558e-19	-545	TSS	TRUE
Fam135a	1886.93	850.511	1834.42	-1.1195	1.33021e-17	Dn	-0.0429321	0.828925	DN_reversed	2.8288e-06	TRUE					Ptpn1	3.52533	1.39772e-48	-27	TSS	TRUE
Fam13b	3800.3	2743.07	3289.48	-0.461479	0.000175247		-0.206262	0.130593	DN_reversed	0.000285052	TRUE					Mocs3	3.78062	1.75577e-26	77	TSS	TRUE
Fam13c	660.485	151.542	246.424	-2.03526	7.44661e-32	Dn	-1.38205	3.79048e-18	DN_reversed	0.0115748	FALSE					Gm14261	2.38029	2.27821e-13	356	TSS	TRUE
Fam149a	2899.54	1407	1470.33	-1.03603	1.51001e-38	Dn	-0.971378	1.30107e-36	DN_reversed	0.00568631	FALSE					Zfp64	3.15701	4.28181e-28	86	TSS	TRUE
Fam168a	3076.18	2373.41	3419.15	-0.368656	8.58887e-05		0.151562	0.143795	DN_reversed	0.00202826	FALSE					Gm14270	2.13918	9.57967e-14	2764	gene_body	TRUE
Fam169a	71.7422	16.9037	42.3601	-1.64362	3.20843e-06	Dn	-0.661387	0.0609184	DN_reversed	0.0117234	FALSE					Gm16796	2.21448	3.53344e-27	1326	TSS	TRUE
Fam173a	571.583	747.742	453.414	0.378393	0.00932466		-0.316842	0.0323581	UP_reversed	0.020058	FALSE					Gm14275	2.07544	4.12151e-08	-5133	intergenic	TRUE
Fam175a	557.827	764.283	584.642	0.444702	0.000886702		0.0580717	0.757094	UP_reversed	0.0271299	FALSE					Fam210b	4.46446	4.96177e-45	-965	TSS	TRUE
Fam178a	5751.75	4691.87	7234.4	-0.289773	0.00907449		0.325825	0.00243875	DN_reversed	0.0490931	TRUE					Cstf1	2.10468	7.67275e-17	865	TSS	TRUE
Fam179b	2470.86	1614.97	3445.76	-0.603575	8.53483e-08	Dn	0.47021	2.40144e-05	DN_reversed	3.31055e-07	TRUE					Gm14455	2.51923	2.20444e-23	-840	TSS	TRUE
Fam198b	12063.2	2179.76	2186.22	-2.45169	1.51298e-260	Dn	-2.44825	1.29493e-274	DN_reversed	3.92965e-25	TRUE					Rae1	2.94115	2.84607e-21	782	TSS	TRUE
Fam199x	2043.88	794.99	2573.97	-1.31556	4.5391e-17	Dn	0.320163	0.0654954	DN_reversed	3.6378e-11	FALSE					Ppp4r1l-ps	3.76081	5.67598e-57	638	TSS	TRUE
Fam206a	2341.15	1539.54	1629.9	-0.598343	6.23152e-11		-0.51805	7.6045e-09	DN_reversed	0.0273715	FALSE					Stx16	2.54714	1.53165e-31	-2422	TSS	TRUE
Fam208a	1882.38	1059.66	2079.18	-0.812969	9.44107e-11	Dn	0.137833	0.37411	DN_reversed	2.24403e-06	TRUE					Gm27899	2.01698	2.34182e-11	-908	TSS	TRUE
Fam208b	5611.62	2390.49	6194.02	-1.19811	1.49015e-17	Dn	0.137764	0.455296	DN_reversed	2.7092e-12	TRUE					Nespas	3.4759	1.14327e-26	-164	TSS	TRUE
Fam20a	534.899	713.705	483.3	0.406901	0.00336011		-0.134829	0.419011	UP_reversed	0.00746639	FALSE					Nespas	2.19117	2.57951e-17	-3764	gene_body	TRUE
Fam20b	3830.5	1680.77	2686.11	-1.17125	1.09635e-30	Dn	-0.508024	7.3599e-07	DN_reversed	2.61509e-06	TRUE					Gm20721	2.08275	2.37574e-10	1111	TSS	TRUE
Fam210a	4757.5	2439.72	3661.6	-0.950224	2.29358e-20	Dn	-0.374894	0.000450576	DN_reversed	0.00382241	TRUE					Atp5e	3.73522	5.76543e-83	1404	TSS	TRUE
Fam214b	566.048	959.016	831.069	0.746846	6.10981e-10	Up	0.54832	5.70131e-06	UP_reversed	0.00401449	FALSE					Slmo2	2.53255	4.7111e-32	1080	TSS	TRUE
Fam221b	1101.45	1726.91	1274.61	0.636814	3.86346e-07	Up	0.211246	0.142256	UP_reversed	0.00214593	TRUE					Gm14401	3.07606	1.22099e-23	-220	TSS	TRUE
Fam45a	1283.4	719.867	1208.29	-0.822267	2.22331e-12	Dn	-0.0899855	0.555123	DN_reversed	0.0124023	TRUE					Gm14409	6.25556	1.73574e-47	-5264	intergenic	TRUE
Fam49b	4568.85	2333.81	3263.63	-0.960757	2.89884e-32	Dn	-0.482304	2.58307e-09	DN_reversed	0.000150931	FALSE					Gm14412	3.2967	3.99329e-77	-4593	intergenic	TRUE
Fam57a	2875.04	1791.33	2203.62	-0.676293	1.05022e-14	Dn	-0.378215	1.62805e-05	DN_reversed	0.00602143	FALSE					Gm14322	3.8046	6.99745e-14	11	TSS	TRUE
Fam63b	264.356	364.844	605.544	0.449013	0.0216766		1.14695	1.54074e-11	UP_reversed	0.031863	TRUE					Gm14325	2.89393	2.81982e-13	317	TSS	TRUE
Fam71f1	243.371	435.408	265.641	0.810138	1.28536e-07	Up	0.125394	0.541131	UP_reversed	0.00488259	FALSE					Zfp972	3.6001	2.39412e-17	-296	TSS	TRUE
Fam76b	1356.08	628.913	959.513	-1.0961	3.56472e-27	Dn	-0.496921	3.32758e-07	DN_reversed	0.00041479	FALSE					Gm14326	8.55024	3.31565e-37	387	TSS	TRUE
Fam8a1	2005.55	1733.93	2319.04	-0.208344	0.0406811		0.206808	0.0335711	DN_reversed	0.0469611	TRUE					Zfp971	6.40969	4.78201e-31	420	TSS	TRUE
Fam91a1	12100	5748.56	11594.7	-1.06088	4.22447e-29	Dn	-0.0614901	0.652215	DN_reversed	1.58604e-10	FALSE					Cdh4	2.16481	6.76168e-09	1568	gene_body	TRUE
Fam96b	1298.47	2602.33	1903.62	0.983788	7.03913e-16	Up	0.54413	1.50696e-05	UP_reversed	0.00272731	FALSE					Ss18l1	2.92053	1.57177e-45	1790	TSS	TRUE
Fam98a	5113.19	2417.61	3214.42	-1.07467	1.33562e-41	Dn	-0.665076	2.08245e-17	DN_reversed	6.56713e-10	TRUE					Mtg2	2.1841	6.49156e-13	707	TSS	TRUE
Fam98b	2523.75	1963.23	2388.64	-0.360906	3.56163e-05		-0.0803004	0.457807	DN_reversed	0.0299608	TRUE					Osbpl2	2.06622	1.02826e-54	-5706	TSS	TRUE
Fancb	10232.9	4771.17	6532.72	-1.09012	3.26242e-36	Dn	-0.642283	1.75046e-13	DN_reversed	8.03671e-06	FALSE					Gid8	2.22494	1.94959e-17	782	TSS	TRUE
Fancm	1182.79	897.585	1216.23	-0.388831	0.00747684		0.0351309	0.866092	DN_reversed	0.0167247	TRUE					Ythdf1	2.7237	1.26466e-15	448	TSS	TRUE
Far1	6528.11	3129.34	6404.12	-1.0476	8.1725e-25	Dn	-0.0287671	0.858977	DN_reversed	1.44233e-11	TRUE					Gmeb2	2.35523	2.26042e-07	534	TSS	TRUE
Farp1	4982.55	2295.9	2238.58	-1.11034	1.44493e-48	Dn	-1.14626	3.89821e-54	DN_reversed	0.0442189	TRUE					Rtel1	2.25719	6.02814e-18	60	TSS	TRUE
Farp2	1374.45	369.273	574.001	-1.70757	9.6927e-11	Dn	-1.1441	1.91452e-05	DN_reversed	0.0138605	TRUE					Arfrp1	2.7037	9.4709e-28	403	TSS	TRUE
Fars2	448.287	856.499	651.224	0.915242	5.77592e-15	Up	0.529384	8.90901e-06	UP_reversed	0.0223222	FALSE					Abhd16b	2.03405	1.80757e-26	1693	TSS	TRUE
Fas	579.975	5619.77	4755.32	3.22449	1.1405e-212	Up	2.98643	8.52824e-184	UP_reversed	1.6521e-06	FALSE					Dnajc5	4.20935	1.44638e-29	314	TSS	TRUE
Fat1	12885.5	7976.08	12355.4	-0.680451	2.08017e-09	Dn	-0.0598811	0.718028	DN_reversed	0.000446213	TRUE					Samd10	2.04322	7.7764e-25	111	TSS	TRUE
Fau	4206	7629.82	5740.84	0.843989	1.21165e-12	Up	0.442039	0.000371022	UP_reversed	0.0280944	FALSE					Pcmtd2	2.44414	4.92968e-11	745	TSS	TRUE
Fbn1	8721.37	1214.82	1110.78	-2.80567	4.16995e-186	Dn	-2.9415	5.8444e-214	DN_reversed	0.00130739	FALSE					Polr3k	2.10468	1.68994e-07	162	TSS	TRUE
Fbxl19	1713.67	1218.03	1541.33	-0.484545	5.39848e-07		-0.148235	0.171984	DN_reversed	0.00446141	TRUE					Pex2	2.55568	4.33917e-16	249	TSS	TRUE
Fbxl2	614.212	801.688	624.303	0.37416	0.00156627		0.0171674	0.925081	UP_reversed	0.0124153	TRUE					Mrps28	2.59456	1.96632e-22	317	TSS	TRUE
Fbxl20	667.616	1215.67	1338.19	0.85169	6.17091e-13	Up	0.987499	9.80766e-18	UP_reversed	5.72362e-05	TRUE					Zbtb10	2.95168	1.82864e-22	597	TSS	TRUE
Fbxo11	4932.86	3867.51	6255.66	-0.349921	7.60372e-06		0.338947	9.03556e-06	DN_reversed	5.43257e-05	TRUE					Zfand1	2.75227	1.14351e-12	316	TSS	TRUE
Fbxo21	3243.06	1971.39	2156.3	-0.710533	8.9501e-18	Dn	-0.581771	7.63373e-13	DN_reversed	0.000792177	FALSE					Snx16	2.36776	2.29272e-09	201	TSS	TRUE
Fbxo3	2774.4	1855.25	2546.92	-0.57392	1.16348e-10		-0.125173	0.231372	DN_reversed	0.0250725	FALSE					Lrrcc1	3.70133	4.54235e-27	-288	TSS	TRUE
Fbxo6	982.355	1537.15	1075.28	0.639107	1.87775e-08	Up	0.13331	0.345992	UP_reversed	0.000561686	TRUE					E2f5	3.23218	1.57872e-19	958	TSS	TRUE
Fbxw10	1915.11	1623.08	1993.07	-0.235548	0.0185538		0.0578836	0.644963	DN_reversed	0.0231791	FALSE					1810022K09Rik	2.8647	1.42567e-18	384	TSS	TRUE
Fbxw11	6912.13	5128.54	7779.34	-0.428041	8.86622e-10		0.16929	0.0238694	DN_reversed	1.84147e-08	FALSE					Car13	2.2216	9.41412e-08	-127	TSS	TRUE
Fbxw7	1071.25	756.083	1358.66	-0.491548	2.70183e-06		0.33619	0.000827292	DN_reversed	2.24597e-05	TRUE					Ythdf3	2.55112	5.89743e-13	487	TSS	TRUE
Fbxw8	5155.15	3646.77	3916.31	-0.494628	1.14005e-11		-0.394058	5.25036e-08	DN_reversed	0.00379298	FALSE					Mir124-2hg	3.00111	5.41309e-16	-96	TSS	TRUE
Fcgrt	503.813	813.877	746.605	0.676463	2.06385e-07	Up	0.558452	1.53899e-05	UP_reversed	0.0277476	FALSE					Armc1	2.75946	8.93293e-21	264	TSS	TRUE
Fdx1l	908.488	1961.33	1408.8	1.08803	2.68477e-18	Up	0.625378	9.87527e-07	UP_reversed	0.0221854	TRUE					Pde7a	2.10468	3.15515e-11	-278	TSS	TRUE
Fdxr	1146.67	1405.34	899.612	0.292276	0.00482081		-0.345503	0.000589767	UP_reversed	0.0156311	FALSE					Crh	2.19424	8.49933e-12	895	TSS	TRUE
Fem1b	5127.99	4256.12	6567.08	-0.267488	0.000265036		0.354169	3.60957e-07	DN_reversed	0.00113943	TRUE					4632415L05Rik	4.24224	1.95623e-39	401	TSS	TRUE
Fgd1	2296.7	1361.39	1663.03	-0.74296	3.52922e-15	Dn	-0.461973	7.93826e-07	DN_reversed	0.035577	TRUE					Hltf	4.15924	3.59862e-49	-11	TSS	TRUE
Fgfr1op2	3277.38	1894.76	2234.01	-0.782321	2.45837e-17	Dn	-0.550118	1.89867e-09	DN_reversed	0.0467701	FALSE					1700125G22Rik	2.71179	1.02044e-22	373	TSS	TRUE
Fhl2	2202.78	3688.46	2485.49	0.731911	2.30959e-12	Up	0.172885	0.160778	UP_reversed	0.0178745	FALSE					Pld1	2.56221	1.43006e-17	4	TSS	TRUE
Fibp	1257.21	2131.35	1325.22	0.751732	5.9925e-15	Up	0.0781929	0.554517	UP_reversed	1.20603e-07	FALSE					1700112D23Rik	3.53585	2.06051e-21	207	TSS	TRUE
Fis1	3791.62	4731.91	3168.85	0.315047	0.00449144		-0.25346	0.0254955	UP_reversed	0.00925902	FALSE					Rpl22l1	2.94655	2.48187e-14	163	TSS	TRUE
Fkbp2	2105.09	3699.73	2086.2	0.800656	7.53565e-13	Up	-0.00994007	0.958612	UP_reversed	0.000184438	FALSE					Egfem1	2.24314	1.78953e-10	-333	TSS	TRUE
Fkbp4	19616.7	17097	18640.2	-0.196837	0.0111393		-0.0729235	0.429623	DN_reversed	0.0202678	FALSE					Sec62	2.587	3.22552e-27	-1075	TSS	TRUE
Fkbp9	19395.8	8644.72	9252.94	-1.16	1.1154e-78	Dn	-1.0621	1.73814e-67	DN_reversed	2.28158e-05	FALSE					Prkci	2.44293	1.63057e-18	552	TSS	TRUE
Flcn	3967.32	11265.7	7630.23	1.49759	7.56525e-117	Up	0.938662	1.58635e-46	UP_reversed	8.11571e-06	FALSE					Skil	2.64254	1.22065e-18	1538	TSS	TRUE
Fli1	116.623	55.655	110.264	-0.957989	0.00026305	Dn	-0.0848072	0.805766	DN_reversed	0.0459411	FALSE					Slc7a14	2.13312	6.11939e-09	677	TSS	TRUE
Flot1	869.466	1888.95	1427.3	1.10877	2.1906e-30	Up	0.712109	2.54966e-13	UP_reversed	2.03606e-09	FALSE					Zmat3	2.18954	6.27282e-15	277	TSS	TRUE
Flt3l	33811.7	69226.7	55170.1	1.01951	2.13611e-23	Up	0.696716	1.94171e-11	UP_reversed	0.0124651	FALSE					Pik3ca	2.36065	9.68058e-22	1128	TSS	TRUE
Fmc1	632.244	910.992	553.018	0.519083	4.31113e-05		-0.179131	0.227564	UP_reversed	0.000812484	FALSE					Gm37592	2.14792	2.5664e-16	443	TSS	TRUE
Fmnl2	1439.25	532.049	899.267	-1.39252	4.61252e-23	Dn	-0.667793	1.66462e-06	DN_reversed	0.00137711	TRUE					Mfn1	3.99011	1.56592e-26	-365	TSS	TRUE
Fmr1	9839.42	3644.78	10755.8	-1.41601	9.39192e-51	Dn	0.126149	0.283193	DN_reversed	2.69336e-20	TRUE					Actl6a	3.92774	1.36832e-72	-307	TSS	TRUE
Fn1	97579.8	57249.6	51416.2	-0.759809	6.49677e-15	Dn	-0.913035	4.06625e-21	DN_reversed	1.52843e-05	FALSE					Mrpl47	2.63947	1.40573e-24	-653	TSS	TRUE
Fnbp1l	4585.79	3253.88	6822.17	-0.490149	3.46795e-07		0.565414	1.38817e-09	DN_reversed	1.53825e-06	TRUE					Ttc14	3.25268	5.08979e-23	-32	TSS	TRUE
Fndc3b	4742.43	2412.76	4549.64	-0.964691	4.36178e-31	Dn	-0.0603428	0.598581	DN_reversed	2.80746e-14	FALSE					Gm43077	2.61801	9.71779e-17	281	TSS	TRUE
Fnip2	2472.48	1857.62	3283.94	-0.406637	0.000396612		0.401819	0.000319296	DN_reversed	0.000556862	TRUE					Atp11b	4.03396	1.68384e-14	365	TSS	TRUE
Fos	59.8274	5175.98	2161.42	6.28846	0	Up	5.04213	0	UP_reversed	1.10252e-13	TRUE					Mccc1	4.57767	2.09834e-29	-91	TSS	TRUE
Fosb	59.1992	2647.73	1925.58	5.33211	6.18444e-291	Up	4.8821	4.99802e-245	UP_reversed	0.000159636	TRUE					Mir7009	3.54788	1.80955e-29	-176	TSS	TRUE
Foxl1	227.376	385.943	213.498	0.727287	0.000824404	Up	-0.0719694	0.822366	UP_reversed	0.00347168	TRUE					Exosc9	2.20991	2.68367e-19	-106	TSS	TRUE
Foxo1	695.714	514.564	683.597	-0.422463	0.00245828		-0.0269392	0.894078	DN_reversed	0.00443547	TRUE					Bbs7	2.3792	1.84796e-14	176	TSS	TRUE
Foxp1	3920.15	1954.55	2259.59	-0.995342	2.61907e-31	Dn	-0.790236	4.03238e-21	DN_reversed	0.000730442	TRUE					4932438A13Rik	3.20485	1.92361e-15	193	TSS	TRUE
Fpgt	830.723	418.349	637.533	-0.957064	1.21031e-11	Dn	-0.38208	0.00801583	DN_reversed	0.038726	TRUE					Cetn4	3.15701	1.76938e-36	345	TSS	TRUE
Frat2	54.3535	641.694	285.702	3.33961	9.26588e-48	Up	2.24894	5.86612e-22	UP_reversed	4.62625e-06	TRUE					Nudt6	2.72703	7.30286e-40	-14	TSS	TRUE
Frk	1143.45	457.781	897.157	-1.29439	1.71661e-29	Dn	-0.350049	0.00198606	DN_reversed	0.000408663	FALSE					Gm42922	2.01606	5.56557e-17	-1644	TSS	TRUE
Frs2	4087.23	2087.25	3856.08	-0.953948	1.52617e-17	Dn	-0.0844307	0.581345	DN_reversed	5.66972e-06	TRUE					Ankrd50	3.71188	4.45912e-50	943	TSS	TRUE
Fscn1	32245.4	14550.9	16569.1	-1.1371	1.87339e-42	Dn	-0.951403	3.19285e-30	DN_reversed	1.12719e-08	FALSE					Hspa4l	2.97661	8.0315e-20	-330	TSS	TRUE
Fstl1	7581.42	3062.42	3466.02	-1.2962	1.64604e-64	Dn	-1.12233	1.44128e-50	DN_reversed	5.30621e-10	TRUE					Plk4	3.53477	2.28528e-32	80	TSS	TRUE
Fstl3	987.93	582.202	780.118	-0.743435	1.50663e-09	Dn	-0.332362	0.00806593	DN_reversed	0.00588297	FALSE					Abhd18	3.01975	4.4067e-14	29	TSS	TRUE
Ftl1	12446.8	31246.9	21082.1	1.2969	1.40874e-22	Up	0.742748	4.7988e-08	UP_reversed	0.0466954	FALSE					6430590A07Rik	3.6278	2.00762e-33	-977	TSS	TRUE
Ftl1-ps1	409.71	1060.91	777.784	1.34331	6.28193e-23	Up	0.91067	3.32903e-11	UP_reversed	0.0447444	FALSE					Pgrmc2	2.67351	1.86575e-30	445	TSS	TRUE
Ftx	560.571	448.574	584.226	-0.323518	0.0288023		0.051574	0.787819	DN_reversed	0.0405029	FALSE					Sclt1	2.84901	1.24287e-20	713	TSS	TRUE
Fubp1	18786.8	9570.05	15096.1	-0.96702	2.26031e-43	Dn	-0.313985	1.63592e-05	DN_reversed	1.99434e-12	FALSE					Pcdh10	2.08836	3.3284e-25	174	TSS	TRUE
Fubp3	4417.39	2498.46	3595.54	-0.814794	7.81741e-25	Dn	-0.296467	0.000268623	DN_reversed	5.32752e-06	TRUE					4930577N17Rik	4.6259	1.53576e-69	-959	TSS	TRUE
Fundc1	1096.36	351.47	520.666	-1.61157	1.33851e-38	Dn	-1.05921	3.61553e-20	DN_reversed	0.0163282	FALSE					Elf2	2.86298	1.78429e-33	-937	TSS	TRUE
Furin	4332.07	3201.95	4704.14	-0.431367	5.25132e-07		0.11894	0.237418	DN_reversed	0.00179871	FALSE					Ndufc1	2.01317	2.01348e-16	-1912	TSS	TRUE
Fut11	701.238	384.401	466.921	-0.848501	4.6563e-11	Dn	-0.57249	3.65098e-06	DN_reversed	0.0184016	TRUE					Naa15	3.32832	4.89293e-31	851	TSS	TRUE
Fv1	532.221	130.571	345.877	-1.68982	2.14363e-07	Dn	-0.535877	0.148075	DN_reversed	0.00166515	TRUE					Rab33b	2.01424	3.04013e-22	-866	TSS	TRUE
Fyttd1	3872.41	2393.08	4341.13	-0.686756	6.1382e-13	Dn	0.161237	0.14105	DN_reversed	4.36871e-08	FALSE					Setd7	2.23505	1.71406e-27	-1221	TSS	TRUE
Fzd2	7158.95	1948.42	1887.1	-1.84453	1.66515e-62	Dn	-1.88967	3.46023e-67	DN_reversed	9.23607e-06	FALSE					5430420F09Rik	2.10468	3.04718e-08	3286	gene_body	TRUE
G2e3	2684.55	1222.52	2052.69	-1.11437	3.26314e-21	Dn	-0.383993	0.00176662	DN_reversed	0.000333479	FALSE					Maml3	2.94951	1.51429e-73	175	TSS	TRUE
G3bp1	22079.2	15170.1	16197.9	-0.538651	4.63073e-17		-0.444323	4.9498e-12	DN_reversed	0.000103402	TRUE					Foxo1	4.49267	6.86812e-71	363	TSS	TRUE
G3bp2	4219.81	2608.52	4540.41	-0.689393	1.76464e-20	Dn	0.104407	0.236526	DN_reversed	1.60776e-09	TRUE					Proser1	4.80567	1.60167e-47	333	TSS	TRUE
Gabarap	9602.81	23491.7	18037	1.26651	7.577e-27	Up	0.892757	7.98931e-14	UP_reversed	0.035215	FALSE					Frem2	2.07869	3.29021e-16	1354	TSS	TRUE
Gabpa	3763.26	2987.23	4781.64	-0.328831	0.000983316		0.339837	0.00046134	DN_reversed	0.0016739	FALSE					Ufm1	3.39618	1.6914e-17	329	TSS	TRUE
Gadd45a	326.951	3353.86	2313.36	3.2923	3.41798e-160	Up	2.76768	7.8783e-114	UP_reversed	5.53697e-08	TRUE					Supt20	3.02547	1.78253e-53	-1325	TSS	TRUE
Gadd45b	1786.02	12104.5	7014.51	2.73948	4.75948e-265	Up	1.95873	1.83921e-135	UP_reversed	4.29465e-09	TRUE					Spg20	3.50779	1.62225e-29	891	TSS	TRUE
Gadd45g	2078.16	14594.9	3826.59	2.78272	3.17988e-219	Up	0.871797	7.24865e-22	UP_reversed	1.5926e-27	TRUE					Nbea	3.99888	2.35338e-17	-199	TSS	TRUE
Galnt1	4858.32	2221.05	3127.26	-1.11843	1.6677e-36	Dn	-0.631099	7.42469e-13	DN_reversed	0.011642	FALSE					Wwtr1	2.94225	6.54165e-51	1327	TSS	TRUE
Galnt10	3185.09	1570.61	2330.03	-1.00645	3.95148e-29	Dn	-0.443843	7.56485e-07	DN_reversed	0.0188094	TRUE					Commd2	2.89393	2.31881e-11	-185	TSS	TRUE
Galnt7	1575.75	830.736	1532.56	-0.908976	6.67697e-19	Dn	-0.0442213	0.763028	DN_reversed	0.000156107	TRUE					Rnf13	3.94111	5.60996e-53	637	TSS	TRUE
Gan	2150.43	1386.31	1876.6	-0.618242	7.27835e-06	Dn	-0.194746	0.223193	DN_reversed	0.037818	TRUE					Pfn2	2.63084	8.40681e-19	1078	TSS	TRUE
Gapvd1	5217.48	4430.55	6115.23	-0.233125	0.0145586		0.226177	0.0156927	DN_reversed	0.0197442	FALSE					Tsc22d2	3.0547	1.82373e-41	884	TSS	TRUE
Gart	6289.44	3088.04	3466.56	-1.01669	8.18017e-31	Dn	-0.852934	1.28972e-22	DN_reversed	0.0268582	TRUE					Eif2a	2.60454	1.33343e-30	-1221	TSS	TRUE
Gas1	5225.99	1556.83	1667.74	-1.7053	1.62988e-41	Dn	-1.61342	3.12512e-38	DN_reversed	0.000336318	TRUE					Selenot	2.64899	1.04332e-12	-336	TSS	TRUE
Gas5	11480.1	35566.3	27539	1.61473	2.41616e-78	Up	1.24963	2.63776e-47	UP_reversed	0.00187014	FALSE					Gm43570	2.07962	3.13274e-09	-142	TSS	TRUE
Gata3	33.7366	165.629	64.9167	1.96468	2.07275e-10	Up	0.800023	0.0188587	UP_reversed	0.000693526	FALSE					B430305J03Rik	4.461	1.54816e-122	1450	TSS	TRUE
Gatad2a	6821.4	5345.29	6432.37	-0.348549	2.22579e-05		-0.0831452	0.415973	DN_reversed	0.000753377	TRUE					Arhgef26	2.14515	4.60142e-12	355	TSS	TRUE
Gbp2	224.316	1017.64	1249.99	2.09515	1.01179e-36	Up	2.38258	1.63766e-48	UP_reversed	0.000195503	FALSE					Slc33a1	2.52561	6.01275e-15	165	TSS	TRUE
Gcc2	2615.48	1518.72	2221.29	-0.764449	2.15195e-08	Dn	-0.233067	0.134093	DN_reversed	0.0143598	FALSE					Gmps	2.49238	8.23562e-14	493	TSS	TRUE
Gcn1l1	8216.69	4885.4	5708.62	-0.740705	5.00766e-15	Dn	-0.519962	5.30548e-08	DN_reversed	0.0131777	FALSE					Kcnab1	2.23096	2.19921e-07	115	TSS	TRUE
Gcom1	12761.6	8820.01	10835.2	-0.529641	2.99856e-14		-0.234234	0.00138814	DN_reversed	0.000223959	TRUE					Gm5540	2.40907	1.47306e-36	-237	TSS	TRUE
Gdap10	270.197	54.5042	217.357	-1.99058	1.53807e-11	Dn	-0.294544	0.405919	DN_reversed	8.26361e-06	TRUE					Tiparp	4.11368	2.86269e-50	589	TSS	TRUE
Gdf11	3718.52	1211.98	1744.05	-1.60356	4.29861e-93	Dn	-1.0836	1.87338e-48	DN_reversed	3.12923e-07	FALSE					Mir8120	2.14677	1.08656e-16	911	TSS	TRUE
Gem	322.805	2381.35	1827.06	2.83203	9.05231e-149	Up	2.45426	3.09052e-113	UP_reversed	0.000452319	FALSE					Gm37305	3.1331	1.32829e-27	-258	TSS	TRUE
Gemin5	9878.28	6048.04	6870.06	-0.699936	3.09663e-14	Dn	-0.519136	2.3271e-08	DN_reversed	0.000822489	FALSE					Gm37078	2.54013	3.23922e-21	5385	intergenic	TRUE
Gen1	904.087	463.579	727.128	-0.934363	2.32094e-11	Dn	-0.314034	0.032778	DN_reversed	0.00943964	TRUE					Ptx3	2.01182	3.9948e-07	789	TSS	TRUE
Gfpt1	4511.07	2557.41	3612.55	-0.806771	1.84601e-14	Dn	-0.318009	0.00432203	DN_reversed	0.0251595	FALSE					Rsrc1	2.13166	1.47757e-24	-790	TSS	TRUE
Ggta1	4468.66	3098.64	4858.81	-0.523987	3.52942e-11		0.11906	0.197159	DN_reversed	0.00373276	TRUE					Shox2	2.67868	6.72144e-19	-4929	gene_body	TRUE
Gigyf1	3125.64	5682.45	4741.78	0.850253	1.86122e-16	Up	0.592012	1.61566e-08	UP_reversed	0.0263605	FALSE					Gm17402	2.25083	4.1849e-10	462	TSS	TRUE
Gins1	1136.1	2672.34	2230.76	1.21857	1.49672e-35	Up	0.963343	5.80283e-23	UP_reversed	0.0310686	TRUE					Lxn	2.06083	4.89024e-10	325	TSS	TRUE
Gja1	8104.97	2510.86	4516.87	-1.68057	8.68483e-136	Dn	-0.838921	1.47129e-37	DN_reversed	1.00233e-11	TRUE					Mfsd1	2.34384	2.32555e-13	58	TSS	TRUE
Gjb4	764.194	1913.46	1350.07	1.30613	1.06618e-40	Up	0.809329	2.07587e-16	UP_reversed	1.4507e-08	FALSE					Smc4	2.9298	2.14321e-45	1761	TSS	TRUE
Gk	2031.25	970.547	1451	-1.04092	4.99921e-17	Dn	-0.480703	0.000138164	DN_reversed	0.00345144	FALSE					Kpna4	2.80623	4.76321e-11	112	TSS	TRUE
Gk5	499.978	392.59	629.232	-0.343515	0.0377783		0.317786	0.0409165	DN_reversed	0.0468471	TRUE					Ppm1l	2.29176	6.1321e-24	838	TSS	TRUE
Glcci1	315.05	143.989	303.221	-1.08198	1.72955e-09	Dn	-0.0548059	0.824248	DN_reversed	1.58545e-05	FALSE					B3galnt1	2.16943	3.74093e-15	659	TSS	TRUE
Glg1	11909.8	5085.27	6829.52	-1.21382	5.55197e-41	Dn	-0.79448	1.93763e-18	DN_reversed	0.00882884	TRUE					Pdcd10	3.42526	6.07459e-39	355	TSS	TRUE
Gli3	3398.68	1381.35	1853.31	-1.27374	6.74539e-24	Dn	-0.86002	8.34208e-12	DN_reversed	0.0149185	FALSE					Gm37256	2.89953	3.90823e-47	-701	TSS	TRUE
Glipr2	1032.18	1329.65	1535.91	0.363772	0.000203382		0.568669	4.45015e-10	UP_reversed	0.00165696	FALSE					Rapgef2	3.81224	3.35772e-51	16	TSS	TRUE
Glis3	1188.57	508.241	832.497	-1.20361	5.96802e-27	Dn	-0.506631	2.45698e-06	DN_reversed	1.13942e-06	FALSE					Fnip2	4.08555	1.12147e-38	495	TSS	TRUE
Glmn	808.754	563.94	847.189	-0.514589	0.000105213		0.0605869	0.736931	DN_reversed	0.00197311	FALSE					4930579G24Rik	2.51084	3.00148e-20	-79	TSS	TRUE
Glmp	5150.44	9882.64	8410.76	0.926944	1.21896e-18	Up	0.69839	4.95427e-11	UP_reversed	0.0314985	FALSE					Fam198b	2.48734	3.68501e-12	-6233	gene_body	TRUE
Gls	11620.4	4907.19	9918.81	-1.23067	7.74124e-45	Dn	-0.226997	0.018854	DN_reversed	5.13447e-17	TRUE					Pdgfc	2.52561	6.63654e-20	1683	gene_body	TRUE
Gm10031	1630.21	1152.32	1805.09	-0.489497	1.586e-05		0.141612	0.282148	DN_reversed	0.00143961	FALSE					Plrg1	3.15701	4.07609e-22	377	TSS	TRUE
Gm10052	7523.82	5752.95	7810.7	-0.384776	8.53925e-08		0.0532856	0.580798	DN_reversed	9.9601e-07	FALSE					Tlr2	2.12859	3.04039e-10	866	TSS	TRUE
Gm10053	1499.33	986.311	1447.03	-0.592772	1.34967e-07		-0.0544302	0.731056	DN_reversed	0.00118573	FALSE					D930015E06Rik	3.11943	2.70043e-34	874	TSS	TRUE
Gm10073	7193.32	15953.9	11722.7	1.13654	3.18307e-35	Up	0.697327	7.11447e-14	UP_reversed	1.38963e-06	FALSE					Fhdc1	2.3279	5.83051e-36	128	TSS	TRUE
Gm10184	2182.33	743.575	1081.64	-1.52655	2.81437e-51	Dn	-1.00456	1.88129e-25	DN_reversed	0.000212294	FALSE					Arfip1	5.87094	1.25288e-44	-266	TSS	TRUE
Gm10250	3521.43	4341.1	3092.47	0.296816	0.00652703		-0.183683	0.116002	UP_reversed	0.0108715	FALSE					Fbxw7	2.24561	1.18377e-27	-1468	TSS	TRUE
Gm10263	851.984	2306.49	1267.75	1.38845	8.37743e-18	Up	0.558912	0.0011573	UP_reversed	0.000709568	FALSE					Gm15535	2.20289	5.01344e-18	844	TSS	TRUE
Gm10275	10645.3	22310.8	17923.3	1.05485	1.18238e-28	Up	0.743139	1.01708e-14	UP_reversed	0.00724528	FALSE					Lrba	2.73608	1.77932e-24	-580	TSS	TRUE
Gm10288	2052.51	3886.92	2595.35	0.896182	1.06563e-09	Up	0.33187	0.0416931	UP_reversed	0.0426415	FALSE					Gm26343	2.10468	3.04718e-08	1161	gene_body	TRUE
Gm10382	25.9017	459.938	170.698	2.92483	1.33844e-12	Up	1.83012	1.679e-05	UP_reversed	0.0362641	FALSE					Dclk2	3.22278	7.31118e-12	9551	gene_body	TRUE
Gm10443	917.64	2672.07	1264.98	1.48947	1.445e-20	Up	0.451849	0.010177	UP_reversed	4.72064e-05	FALSE					Cd1d1	2.26253	3.43915e-11	-459	TSS	TRUE
Gm10651	391.43	255.847	423.814	-0.593824	6.06927e-05		0.107885	0.542244	DN_reversed	0.0137695	FALSE					Kirrel	2.33403	4.21151e-22	1346	TSS	TRUE
Gm10698	3035.9	1664.9	2327.52	-0.852708	2.22805e-20	Dn	-0.378695	4.972e-05	DN_reversed	1.69123e-05	FALSE					Hdgf	2.40534	8.615e-30	978	TSS	TRUE
Gm10766	41.6746	146.609	60.6913	1.63243	2.02972e-09	Up	0.494263	0.122193	UP_reversed	0.0380168	TRUE					Nes	2.04667	2.86002e-23	2406	TSS	TRUE
Gm11189	90.8106	31.1987	62.4622	-1.3354	1.51612e-05	Dn	-0.499501	0.109907	DN_reversed	0.0312982	FALSE					Iqgap3	2.66843	1.50935e-12	-271	TSS	TRUE
Gm11223	978.63	1617.64	1452.76	0.715312	5.89531e-13	Up	0.565033	1.08214e-08	UP_reversed	0.0115281	FALSE					Tsacc	2.98403	1.0868e-39	398	TSS	TRUE
Gm11349	350.418	174.54	270.965	-0.957636	7.59981e-07	Dn	-0.373157	0.0639524	DN_reversed	0.00354152	FALSE					2810403A07Rik	2.36216	3.30764e-27	-203	TSS	TRUE
Gm11361	1670.28	4856.46	3176.06	1.51779	1.79682e-45	Up	0.915928	3.44456e-17	UP_reversed	2.50826e-06	FALSE					Ash1l	3.10568	2.54783e-25	177	TSS	TRUE
Gm11478	5113.62	10643.1	7863.64	1.03589	1.03932e-16	Up	0.609063	2.08312e-06	UP_reversed	0.0119342	FALSE					Fdps	2.56069	2.31699e-22	158	TSS	TRUE
Gm11539	3573.94	6103.2	4292.02	0.754739	2.03013e-08	Up	0.259783	0.088322	UP_reversed	0.0304929	FALSE					Thbs3	2.54315	5.28715e-26	-380	TSS	TRUE
Gm11633	114.332	177.97	110.552	0.609401	0.0118114		-0.0341247	0.926267	UP_reversed	0.0329763	FALSE					Gm22642	2.84521	3.8127e-14	-2978	intergenic	TRUE
Gm11652	737.876	529.133	843.507	-0.46665	0.000882758		0.181471	0.237986	DN_reversed	0.00566434	FALSE					Gm15417	2.35869	1.11873e-143	-5650	TSS	TRUE
Gm11663	648.41	203.895	383.203	-1.41354	1.10584e-05	Dn	-0.653493	0.0612991	DN_reversed	0.000148652	FALSE					Flad1	2.65769	1.85649e-152	4569	TSS	TRUE
Gm11744	27.9987	74.0056	39.5858	1.19732	0.000408327	Up	0.426167	0.287198	UP_reversed	0.0482363	FALSE					Shc1	2.72651	3.19453e-92	4956	TSS	TRUE
Gm11808	3514.49	6945.93	4467.86	0.956589	3.11974e-11	Up	0.338248	0.0341753	UP_reversed	0.000598338	FALSE					Ube2q1	2.00236	2.48195e-24	383	TSS	TRUE
Gm11814	1059.73	326.411	433.566	-1.66821	2.52267e-42	Dn	-1.26621	2.86307e-29	DN_reversed	0.00101146	FALSE					Hax1	2.20395	2.97721e-13	596	TSS	TRUE
Gm11816	218.427	41.3712	86.2139	-2.16499	1.23681e-19	Dn	-1.26723	7.79765e-10	DN_reversed	0.014348	FALSE					Ubap2l	4.47243	3.84863e-49	164	TSS	TRUE
Gm11847	245.711	100.501	200.586	-1.16909	3.94112e-07	Dn	-0.272976	0.29267	DN_reversed	0.00486723	FALSE					4930537H20Rik	3.87753	1.3515e-109	-817	TSS	TRUE
Gm11865	554.708	271.041	425.03	-1.00141	3.57329e-12	Dn	-0.374001	0.00892173	DN_reversed	0.00376987	FALSE					Ints3	2.23797	4.24227e-36	2028	TSS	TRUE
Gm11942	2810.97	6950.77	4033.29	1.27513	2.85338e-21	Up	0.510154	0.000340827	UP_reversed	0.00022815	FALSE					Snapin	2.02951	6.49663e-11	1232	TSS	TRUE
Gm11964	768.933	1016.25	674.348	0.399736	0.00170356		-0.179042	0.213251	UP_reversed	0.00657431	FALSE					S100a10	3.80846	2.51602e-21	-180	TSS	TRUE
Gm12020	1487.95	1164.69	1397.41	-0.34928	0.0106524		-0.0882367	0.609068	DN_reversed	0.0120707	FALSE					Them4	2.16845	2.43278e-15	-89	TSS	TRUE
Gm12097	497.886	205.465	327.675	-1.22544	2.0281e-12	Dn	-0.594111	0.000481779	DN_reversed	0.00446611	FALSE					Gm42463	3.01802	4.31235e-30	298	TSS	TRUE
Gm12191	1269.78	2647.85	1928.09	1.03706	4.72828e-15	Up	0.591115	1.48219e-05	UP_reversed	0.0132456	FALSE					Snx27	2.3807	1.19449e-18	915	TSS	TRUE
Gm12254	3943.88	8865.08	5613.29	1.14904	1.34064e-24	Up	0.501676	1.83838e-05	UP_reversed	0.000112498	FALSE					Pogz	3.65549	6.63913e-18	932	gene_body	TRUE
Gm12338	1080.41	1712.09	1153.81	0.654826	1.4678e-08	Up	0.0981313	0.523912	UP_reversed	0.00933473	FALSE					Zfp687	4.07897	0	5236	TSS	TRUE
Gm12355	684.715	417.298	589.084	-0.693663	9.32197e-07	Dn	-0.204427	0.193499	DN_reversed	0.00265089	FALSE					Pip5k1a	2.63084	1.30623e-13	729	TSS	TRUE
Gm12396	269.31	588.989	370.54	1.08229	2.86603e-09	Up	0.452968	0.0222566	UP_reversed	0.0102382	TRUE					Vps72	2.45545	6.00035e-10	-622	TSS	TRUE
Gm12444	108.132	42.2482	88.4437	-1.18364	2.29656e-05	Dn	-0.277569	0.368629	DN_reversed	0.0119431	FALSE					Sema6c	2.17368	3.89476e-27	1494	TSS	TRUE
Gm12857	35.6539	124.683	64.7675	1.55972	2.94645e-07	Up	0.740493	0.024948	UP_reversed	0.0131609	FALSE					Arnt	2.39933	7.82869e-09	209	TSS	TRUE
Gm12988	368.712	247.702	327.869	-0.555382	0.00181017		-0.168623	0.410161	DN_reversed	0.0474492	FALSE					Golph3l	8.30177	2.51743e-115	265	TSS	TRUE
Gm13034	126.474	63.8553	130.654	-0.885082	0.00318338	Dn	0.0244574	0.956647	DN_reversed	0.00883212	TRUE					Ensa	2.88815	8.13749e-177	3488	TSS	TRUE
Gm13082	133.118	86.8314	173.302	-0.559869	0.0271069		0.349366	0.151587	DN_reversed	0.0366031	FALSE					Mcl1	2.17447	1.14702e-42	-3288	TSS	TRUE
Gm13136	150.69	58.2749	139.147	-1.21352	4.84585e-06	Dn	-0.119735	0.730583	DN_reversed	0.00283644	FALSE					Rprd2	3.32882	3.95357e-35	-142	TSS	TRUE
Gm13192	27.7721	78.6867	37.8361	1.25521	0.00026421	Up	0.379578	0.36804	UP_reversed	0.0175673	FALSE					Aph1a	2.29955	3.49363e-15	1030	TSS	TRUE
Gm13212	895.257	338.952	1465.14	-1.3687	6.02846e-26	Dn	0.694394	4.24349e-09	DN_reversed	2.29033e-17	FALSE					Anp32e	2.29955	1.86669e-08	-7946	intergenic	TRUE
Gm13410	356.844	96.4341	280.887	-1.73766	6.21962e-16	Dn	-0.340947	0.133714	DN_reversed	0.000256291	FALSE					Anp32e	5.85363	1.19803e-145	53	TSS	TRUE
Gm13416	142.497	78.9939	164.244	-0.797718	0.000725237	Dn	0.191429	0.468191	DN_reversed	0.00835828	FALSE					Vps45	2.5313	4.91079e-14	765	TSS	TRUE
Gm13436	1972.86	4731.19	2693.25	1.23182	8.77922e-20	Up	0.440767	0.00243575	UP_reversed	6.19663e-05	FALSE					Otud7b	3.85857	6.6113e-22	272	TSS	TRUE
Gm13502	1046.29	115.092	254.309	-3.03749	2.48905e-74	Dn	-2.0012	2.98697e-44	DN_reversed	0.000478045	FALSE					Gm44492	2.3423	4.30938e-18	-1	TSS	TRUE
Gm13886	473.051	216.022	299.657	-1.10681	6.79443e-12	Dn	-0.647901	2.61429e-05	DN_reversed	0.00533739	FALSE					Hist2h4	2.51272	1.10783e-17	-89	TSS	TRUE
Gm13961	173.772	97.3222	199.582	-0.763256	0.00124979	Dn	0.18236	0.505273	DN_reversed	0.0133907	FALSE					Hist2h3b	2.23419	1.64772e-16	-454	TSS	TRUE
Gm14026	297.266	191.103	294.813	-0.595622	0.000844053		-0.0125055	0.962502	DN_reversed	0.0262963	TRUE					Gm20628	2.14635	6.89678e-22	-6011	gene_body	TRUE
Gm14124	566.09	172.853	694.508	-1.60289	2.37308e-14	Dn	0.27384	0.257119	DN_reversed	4.4943e-10	TRUE					Gm22614	2.82218	1.22319e-11	8370	intergenic	TRUE
Gm14137	669.864	838.311	516.685	0.319613	0.0106115		-0.371128	0.00224312	UP_reversed	0.0306042	FALSE					Lix1l	2.49721	1.12311e-82	-1949	TSS	TRUE
Gm14139	780.946	439.486	1017.35	-0.802775	2.32374e-07	Dn	0.367892	0.0205279	DN_reversed	6.14431e-07	TRUE					Rbm8a	2.6983	2.93517e-17	466	TSS	TRUE
Gm14150	1619.07	566.907	698.067	-1.47597	6.87641e-35	Dn	-1.18871	3.88038e-25	DN_reversed	0.00649569	FALSE					Ankrd35	2.44668	9.03829e-14	468	TSS	TRUE
Gm14176	919.134	685.049	891.215	-0.407847	0.00249861		-0.0375134	0.844766	DN_reversed	0.0264932	FALSE					Gja5	3.36748	8.68128e-16	306	TSS	TRUE
Gm14303	9462	22263.4	13038.2	1.20996	5.63798e-23	Up	0.453831	0.000486937	UP_reversed	2.84003e-06	FALSE					Acp6	2.22426	1.80889e-21	722	TSS	TRUE
Gm14325	261.103	99.6572	185.455	-1.30521	2.13213e-11	Dn	-0.485775	0.00904331	DN_reversed	0.0409741	TRUE					Notch2	2.36371	2.26394e-19	-838	TSS	TRUE
Gm14373	500.558	179.506	518.998	-1.38221	3.26552e-11	Dn	0.0424173	0.893589	DN_reversed	8.8246e-07	FALSE					Zfp697	2.2216	8.25816e-18	1638	TSS	TRUE
Gm14412	713.272	204.873	399.793	-1.70648	1.13653e-19	Dn	-0.811159	9.77461e-06	DN_reversed	0.00278623	TRUE					Gdap2	2.69098	2.16157e-29	-1181	TSS	TRUE
Gm14513	128.674	368.581	216.997	1.44902	1.76912e-13	Up	0.730757	0.00039215	UP_reversed	0.0199688	FALSE					Man1a2	2.25814	5.14224e-13	702	TSS	TRUE
Gm14586	6949.91	15804.2	10070.7	1.16732	8.10712e-28	Up	0.527724	1.90533e-06	UP_reversed	1.70645e-05	FALSE					Trim45	2.80493	2.60098e-121	806	TSS	TRUE
Gm14698	316.893	95.0317	208.032	-1.61398	1.00064e-12	Dn	-0.587784	0.00867339	DN_reversed	0.000421229	FALSE					Ttf2	4.01993	3.39069e-54	1562	TSS	TRUE
Gm14857	453.142	279.252	371.199	-0.688802	1.21583e-05	Dn	-0.288185	0.0785889	DN_reversed	0.0279825	FALSE					Ptgfrn	2.21429	2.52799e-12	977	TSS	TRUE
Gm15128	424.039	247.987	448.227	-0.753328	4.43643e-07	Dn	0.0724642	0.711789	DN_reversed	0.00666692	FALSE					Atp1a1	3.15701	6.56919e-24	583	TSS	TRUE
Gm15148	279.751	590.861	494.194	1.04913	4.25386e-11	Up	0.799456	5.18244e-07	UP_reversed	0.00906749	FALSE					Nhlh2	2.45545	1.10738e-12	1653	gene_body	TRUE
Gm15359	173.069	58.2861	118.352	-1.43643	8.3154e-10	Dn	-0.518326	0.020167	DN_reversed	0.00549525	FALSE					Csde1	2.9857	4.01346e-24	173	TSS	TRUE
Gm15361	509.758	296.089	721.903	-0.765624	3.53458e-08	Dn	0.490005	0.00012694	DN_reversed	1.22654e-07	FALSE					Bcas2	2.28508	2.84119e-10	-6155	gene_body	TRUE
Gm15398	364.303	244.149	397.01	-0.539713	0.00275261		0.1236	0.570509	DN_reversed	0.0209499	FALSE					Bcas2	2.08684	2.09071e-12	-355	TSS	TRUE
Gm15427	9155.37	17863.1	12981.4	0.941264	3.37041e-12	Up	0.492128	0.000512786	UP_reversed	0.0162287	FALSE					Trim33	2.68931	4.93961e-23	-293	TSS	TRUE
Gm15429	1083.78	573.18	718.745	-0.90024	6.85931e-16	Dn	-0.578924	7.05086e-08	DN_reversed	0.011004	FALSE					Hipk1	4.14745	6.72755e-40	362	TSS	TRUE
Gm15452	515.359	729.414	522.918	0.489456	0.000127247		0.0223577	0.910899	UP_reversed	0.0367307	FALSE					Dclre1b	3.68318	4.28554e-31	343	TSS	TRUE
Gm15453	2691.59	1886.2	2560.53	-0.507959	1.12184e-10		-0.0720877	0.471103	DN_reversed	0.0010463	FALSE					Rsbn1	3.38091	5.5916e-35	379	TSS	TRUE
Gm15528	205.304	103.702	168.586	-0.911253	1.83776e-05	Dn	-0.277049	0.224152	DN_reversed	0.00195432	FALSE					Magi3	4.40893	6.44038e-76	-226	TSS	TRUE
Gm15773	605.055	417.287	606.462	-0.522102	0.000335675		-0.00278999	0.990786	DN_reversed	0.024242	FALSE					4930509H03Rik	3.31291	4.04101e-38	-1287	intergenic	TRUE
Gm15784	154.798	43.9689	92.1569	-1.56606	2.86188e-09	Dn	-0.693899	0.00559394	DN_reversed	0.0475807	FALSE					Gm26091	2.36776	2.29272e-09	838	gene_body	TRUE
Gm16072	74.1783	16.0378	57.5218	-1.70349	1.39368e-06	Dn	-0.337592	0.39708	DN_reversed	0.00894728	FALSE					Slc16a1	3.70511	9.70469e-44	-368	TSS	TRUE
Gm16425	661.764	319.395	484.631	-1.0138	1.14583e-10	Dn	-0.442603	0.00537639	DN_reversed	0.000374867	FALSE					Mov10	2.10468	3.70082e-15	662	TSS	TRUE
Gm16464	495.425	200.18	418.819	-1.24747	4.88285e-14	Dn	-0.241672	0.180045	DN_reversed	0.000173197	FALSE					Capza1	2.59577	1.55057e-28	-695	TSS	TRUE
Gm16589	316.963	108.383	285.263	-1.4436	3.26278e-14	Dn	-0.15131	0.498731	DN_reversed	0.000855524	FALSE					Wnt2b	3.53285	8.88807e-13	-6079	intergenic	TRUE
Gm17067	138.879	40.5387	172.907	-1.57153	6.31919e-09	Dn	0.279144	0.336631	DN_reversed	0.000126188	FALSE					Cttnbp2nl	3.09323	3.56522e-58	-1154	TSS	TRUE
Gm17275	88.2323	677.038	208.747	2.75875	2.08735e-38	Up	1.14134	3.81681e-07	UP_reversed	1.2119e-05	FALSE					Ddx20	3.15701	2.67326e-26	273	TSS	TRUE
Gm17501	324.256	955.257	503.829	1.51775	4.23502e-33	Up	0.618105	3.11832e-06	UP_reversed	0.00326504	TRUE					Fam212b	2.1638	5.70135e-20	1000	TSS	TRUE
Gm17655	92.317	35.5392	94.0669	-1.17293	5.93229e-05	Dn	0.020549	0.96107	DN_reversed	0.00641104	FALSE					Dennd2d	2.00445	2.61869e-08	168	TSS	TRUE
Gm1826	301.351	158.513	224.935	-0.876187	4.06718e-06	Dn	-0.400536	0.0369557	DN_reversed	0.0178075	FALSE					Dram2	2.56668	6.3997e-16	-498	TSS	TRUE
Gm18588	461.505	284.196	623.032	-0.679395	5.29849e-05	Dn	0.413045	0.0117341	DN_reversed	0.0196805	FALSE					Lamtor5	2.04621	8.4202e-08	541	TSS	TRUE
Gm19028	141.051	80.1336	133.844	-0.739753	0.00333946	Dn	-0.0804886	0.808501	DN_reversed	0.0416143	FALSE					Rbm15	5.88787	1.90456e-277	672	TSS	TRUE
Gm19426	189.531	306.317	153.681	0.658255	0.000504614	Up	-0.273506	0.21213	UP_reversed	0.00190899	FALSE					Slc6a17	2.0326	8.7898e-14	317	TSS	TRUE
Gm19587	662.12	329.305	511.19	-0.987175	1.56037e-14	Dn	-0.371918	0.00312861	DN_reversed	3.24578e-05	FALSE					Gm10961	3.2549	1.6886e-29	-522	TSS	TRUE
Gm2000	1062.05	2212.59	1450.23	1.04326	2.28813e-20	Up	0.446158	0.000161894	UP_reversed	0.000760565	FALSE					Gnai3	2.82334	3.47871e-20	1045	TSS	TRUE
Gm20541	252.102	118.041	207.884	-1.04244	1.1288e-07	Dn	-0.275915	0.186003	DN_reversed	0.0101409	FALSE					1700010K24Rik	4.64617	2.74163e-77	-715	TSS	TRUE
Gm20554	151.497	58.2638	109.624	-1.23595	1.00235e-06	Dn	-0.444285	0.0811554	DN_reversed	0.0316457	FALSE					Scarna2	2.39835	6.37439e-14	550	TSS	TRUE
Gm20568	64.998	198.756	84.9128	1.44649	3.71509e-07	Up	0.371621	0.288036	UP_reversed	0.0293422	FALSE					Wdr47	4.94599	2.94342e-50	420	TSS	TRUE
Gm20689	96.7938	53.0128	93.352	-0.754099	0.00974704	Dn	-0.0576941	0.884391	DN_reversed	0.018286	FALSE					Clcc1	2.03357	5.70742e-14	-113	TSS	TRUE
Gm20939	381.192	171.898	372.331	-1.09636	1.05128e-11	Dn	-0.0365401	0.872926	DN_reversed	7.50632e-06	FALSE					Stxbp3	2.11834	2.05002e-16	210	TSS	TRUE
Gm21960	56.6256	117.198	64.7243	0.933372	0.000859738	Up	0.163185	0.670861	UP_reversed	0.0280393	FALSE					Prpf38b	2.13533	6.18299e-22	-1173	TSS	TRUE
Gm2223	5332.71	1742.26	3605.13	-1.59386	6.70871e-59	Dn	-0.559889	1.47673e-08	DN_reversed	7.46847e-14	FALSE					Ntng1	2.51084	3.00148e-20	810	TSS	TRUE
Gm2381	933.175	176.372	432.763	-2.2843	2.30446e-34	Dn	-1.07251	1.47173e-09	DN_reversed	0.000547078	FALSE					Prmt6	2.22848	4.58255e-17	397	TSS	TRUE
Gm23849	40.3808	79.005	64.1271	0.841395	0.0057728	Up	0.600161	0.0529187	UP_reversed	0.0173125	FALSE					Gm17954	2.51203	8.15005e-12	1683	intergenic	TRUE
Gm26461	33.7694	867.426	77.6568	4.45163	1.31057e-104	Up	1.13619	1.11559e-06	UP_reversed	6.39278e-17	FALSE					Extl2	2.19912	1.38202e-18	737	TSS	TRUE
Gm26513	70.925	210.112	113.849	1.45743	4.0129e-11	Up	0.6286	0.00839786	UP_reversed	0.0225185	FALSE					Gpr88	2.37292	9.84061e-16	1302	gene_body	TRUE
Gm26819	193.795	689.886	354.181	1.77188	7.61927e-32	Up	0.839419	8.39352e-08	UP_reversed	0.000113098	FALSE					Cdc14a	2.35391	4.19368e-22	-668	TSS	TRUE
Gm26880	2780.42	1320.02	1644	-1.0614	1.96525e-25	Dn	-0.745185	9.64528e-14	DN_reversed	0.000176575	FALSE					Rtca	2.06172	9.10865e-19	1207	TSS	TRUE
Gm28321	2216.75	7007.24	3942.98	1.64335	9.32935e-82	Up	0.820324	5.32731e-21	UP_reversed	5.06278e-05	FALSE					Sass6	2.55112	5.89743e-13	487	TSS	TRUE
Gm29237	100.269	17.7808	36.9608	-1.95335	4.16883e-08	Dn	-1.23249	0.000305136	DN_reversed	0.0105732	FALSE					Agl	2.33018	1.24677e-12	365	TSS	TRUE
Gm31258	8.56618	159.764	13.1989	3.43179	1.57677e-20	Up	0.534075	0.270212	UP_reversed	7.04313e-05	FALSE					Frrs1	2.96568	5.17025e-13	1835	gene_body	TRUE
Gm35013	129.26	49.527	134.101	-1.22564	1.86897e-06	Dn	0.0361308	0.920975	DN_reversed	0.00201308	FALSE					Gm42928	2.65455	5.1789e-44	-126	TSS	TRUE
Gm3604	215.589	75.793	227.058	-1.41911	4.77903e-12	Dn	0.066826	0.799921	DN_reversed	0.000426038	FALSE					Gm43608	2.05456	6.42504e-09	4145	gene_body	TRUE
Gm3608	2978.81	1161.88	2320.73	-1.33852	9.41888e-39	Dn	-0.358129	0.000686761	DN_reversed	1.60152e-10	FALSE					Gm43823	2.32054	1.01185e-11	4201	intergenic	TRUE
Gm36989	48.7063	14.2838	70.3577	-1.26313	0.000691967	Dn	0.42981	0.26757	DN_reversed	0.011642	FALSE					F3	2.56367	3.59764e-34	462	TSS	TRUE
Gm37352	95.3578	274.164	227.006	1.44255	2.73801e-11	Up	1.18952	3.45549e-08	UP_reversed	0.00237273	FALSE					Abcd3	2.12973	7.1776e-10	1	TSS	TRUE
Gm37494	1416.18	769.734	1330.84	-0.856554	6.55221e-09	Dn	-0.0920802	0.650302	DN_reversed	0.00425863	TRUE					Gm9361	2.08742	8.82821e-13	703	TSS	TRUE
Gm4202	3169.35	2276.4	3848.68	-0.472514	1.68211e-09		0.277414	0.000404007	DN_reversed	7.82195e-05	FALSE					Gclm	2.3842	1.45589e-19	542	TSS	TRUE
Gm42547	686.326	426.101	632.466	-0.677822	1.56096e-07	Dn	-0.118405	0.448446	DN_reversed	0.00154495	FALSE					Fnbp1l	3.18471	5.29113e-25	514	TSS	TRUE
Gm42664	91.5279	25.3445	99.625	-1.39868	0.000150286	Dn	0.0890062	0.866315	DN_reversed	0.0101583	FALSE					Pde5a	2.77925	1.46431e-18	952	TSS	TRUE
Gm42725	26.9174	113.963	34.4214	1.78035	2.27357e-08	Up	0.280857	0.520391	UP_reversed	0.02838	FALSE					1810037I17Rik	2.27688	5.17902e-15	1396	TSS	TRUE
Gm42979	332.623	146.894	211.255	-1.12766	4.63991e-09	Dn	-0.641493	0.000551814	DN_reversed	0.00743016	FALSE					Usp53	4.68013	1.06966e-56	109	TSS	TRUE
Gm43011	15.1635	327.78	162.441	3.99625	7.74862e-54	Up	3.0423	2.41764e-31	UP_reversed	0.0442109	FALSE					Mettl14	6.31403	1.11263e-27	-392	TSS	TRUE
Gm43154	50.2408	167.25	167.978	1.62058	8.96654e-12	Up	1.63134	1.537e-12	UP_reversed	0.0275383	FALSE					Camk2d	2.21124	4.13045e-19	-207	TSS	TRUE
Gm43162	42.1231	7.56372	40.3645	-1.52008	0.000116196	Dn	-0.064569	0.908626	DN_reversed	0.0148302	FALSE					Gm15551	2.07837	7.38566e-09	743	TSS	TRUE
Gm43300	58.321	19.5014	81.6466	-1.16338	0.00108429	Dn	0.402532	0.279738	DN_reversed	0.00744975	FALSE					Zgrf1	4.0155	1.68579e-41	110	TSS	TRUE
Gm4332	12488.4	30356.4	22228.6	1.26522	1.1407e-38	Up	0.821612	7.35326e-17	UP_reversed	7.28736e-06	FALSE					Neurog2	2.05071	5.02165e-15	64	TSS	TRUE
Gm43878	46.5812	84.4964	37.6758	0.736172	0.0365228		-0.26954	0.530565	UP_reversed	0.0413845	FALSE					Alpk1	2.61581	1.6289e-14	326	TSS	TRUE
Gm44669	81.2428	11.9266	50.181	-2.0074	1.52113e-08	Dn	-0.61419	0.0844885	DN_reversed	0.00296004	FALSE					Gm42697	3.7341	2.35359e-29	-3245	gene_body	TRUE
Gm45133	485.73	180.076	279.832	-1.37687	1.4118e-19	Dn	-0.781612	2.07617e-08	DN_reversed	0.0174299	FALSE					Gar1	3.15701	6.06313e-15	295	TSS	TRUE
Gm4596	470.492	371.312	546.947	-0.337464	0.0363618		0.217107	0.17806	DN_reversed	0.0482102	FALSE					Ccdc109b	2.81876	2.74392e-14	505	TSS	TRUE
Gm4604	4505.29	8316.34	5640.42	0.863076	3.97498e-10	Up	0.317276	0.0380226	UP_reversed	0.0110343	FALSE					Gm42997	6.40969	3.34961e-60	98	TSS	TRUE
Gm4617	15647.1	9079.19	13993.5	-0.779088	1.73387e-24	Dn	-0.159784	0.0660847	DN_reversed	3.67906e-09	FALSE					4930534D22Rik	2.77322	3.38958e-38	256	TSS	TRUE
Gm4799	955.255	1395.48	688.914	0.531729	0.000404268		-0.452392	0.00317898	UP_reversed	0.00163178	FALSE					Tbck	2.52561	5.35558e-10	-44	TSS	TRUE
Gm4875	407.491	177.445	259.121	-1.13753	9.68696e-10	Dn	-0.638139	0.000427419	DN_reversed	0.0118349	FALSE					Ints12	3.79479	3.22444e-32	359	TSS	TRUE
Gm4895	353.207	215.012	431.581	-0.679942	2.41483e-05	Dn	0.276467	0.0871934	DN_reversed	0.000152178	FALSE					Cenpe	2.15324	8.01204e-15	462	TSS	TRUE
Gm4950	310.428	602.01	287.431	0.909049	2.74124e-06	Up	-0.0931547	0.743515	UP_reversed	0.00310725	FALSE					Cisd2	2.25501	2.77557e-08	524	TSS	TRUE
Gm5141	359.559	167.261	289.915	-1.05593	8.25379e-10	Dn	-0.312362	0.0776444	DN_reversed	0.0298486	FALSE					4930539J05Rik	3.29837	2.01597e-46	-135	TSS	TRUE
Gm5297	1560.41	1235.37	1377.64	-0.335706	0.0018575		-0.177128	0.122484	DN_reversed	0.00416094	FALSE					Nfkb1	2.1836	3.6793e-10	645	TSS	TRUE
Gm5417	101.318	45.438	95.6784	-0.988354	0.000609547	Dn	-0.0645249	0.870242	DN_reversed	0.0209495	FALSE					Slc39a8	2.03786	3.20767e-12	620	TSS	TRUE
Gm5436	1680.38	2190.48	1481.69	0.376849	0.00163745		-0.175522	0.191294	UP_reversed	0.00388389	FALSE					Ppp3ca	3.21289	1.50829e-72	1075	TSS	TRUE
Gm5596	507.614	132.336	296.156	-1.85837	7.65772e-26	Dn	-0.766058	2.30974e-06	DN_reversed	8.45857e-05	FALSE					Gm43403	2.12691	3.05952e-29	2373	TSS	TRUE
Gm5601	2704.65	1752.76	2665.39	-0.616748	1.99176e-10	Dn	-0.0179696	0.907224	DN_reversed	0.000109771	FALSE					Gm43689	4.83119	1.0946e-35	244	TSS	TRUE
Gm561	301.281	702.478	529.266	1.19709	2.7541e-20	Up	0.795609	9.98848e-10	UP_reversed	0.00628291	FALSE					Trmt10a	6.14787	1.71894e-48	251	TSS	TRUE
Gm5611	333.53	788.466	430.046	1.20201	1.27746e-14	Up	0.360969	0.039331	UP_reversed	0.0193128	FALSE					Adh5	3.18624	7.04525e-46	-493	TSS	TRUE
Gm5617	78.6551	124.158	74.7545	0.606246	0.0243169		-0.046429	0.906737	UP_reversed	0.044128	TRUE					Metap1	2.00996	1.29107e-17	2014	TSS	TRUE
Gm5644	734.854	1351.18	1139.76	0.862195	2.77656e-15	Up	0.621835	1.28514e-08	UP_reversed	0.00425358	FALSE					Tspan5	2.10468	3.25412e-23	2004	TSS	TRUE
Gm5763	53.0035	146.827	92.8185	1.33573	8.80898e-07	Up	0.725211	0.0116994	UP_reversed	0.00611558	FALSE					Rap1gds1	3.13135	8.29243e-26	-199	TSS	TRUE
Gm5805	1559.97	2875.48	2271.09	0.859497	1.26265e-09	Up	0.530416	0.000288569	UP_reversed	0.0405387	FALSE					Pdlim5	2.75946	8.93293e-21	592	TSS	TRUE
Gm5829	151.002	345.253	307.489	1.1417	1.20258e-11	Up	0.978951	3.28137e-09	UP_reversed	0.0409592	FALSE					Pkn2	5.02783	7.49258e-32	103	TSS	TRUE
Gm5830	179.704	97.0373	141.133	-0.826154	0.000317636	Dn	-0.328851	0.171118	DN_reversed	0.0321988	FALSE					Gm43445	5.33685	4.14007e-28	-2938	gene_body	TRUE
Gm5841	497.915	278.56	551.415	-0.803558	2.67923e-06	Dn	0.13248	0.534042	DN_reversed	0.000533964	FALSE					Lmo4	3.61303	1.55424e-26	319	TSS	TRUE
Gm5846	1451.65	1020.25	1199.11	-0.504225	1.34826e-07		-0.272191	0.0048322	DN_reversed	0.0194523	FALSE					Selenof	2.83094	6.63156e-34	373	TSS	TRUE
Gm5903	664.206	330.411	628.667	-0.975099	3.28081e-14	Dn	-0.0800548	0.628822	DN_reversed	3.80672e-06	FALSE					Znhit6	2.17602	2.18177e-26	-132	TSS	TRUE
Gm5905	7057.06	14690	9653.78	1.03936	1.35167e-19	Up	0.444875	0.00023166	UP_reversed	0.000182623	FALSE					Gm17501	2.34081	6.43366e-56	1105	TSS	TRUE
Gm5913	3215.12	2158.17	2488.25	-0.56887	5.25287e-11		-0.367338	2.40242e-05	DN_reversed	0.00142036	FALSE					Ddah1	2.94655	7.19466e-22	424	TSS	TRUE
Gm5963	2981.18	7300.14	4624.92	1.26643	1.40213e-24	Up	0.622403	1.15437e-06	UP_reversed	8.74564e-05	FALSE					Bcl10	2.37093	2.57566e-47	3037	TSS	TRUE
Gm6030	574.275	1950.13	1527.04	1.73236	1.08882e-50	Up	1.385	3.43121e-33	UP_reversed	0.000548338	FALSE					2410004B18Rik	2.06216	5.9179e-19	685	TSS	TRUE
Gm6039	158.854	89.4736	176.738	-0.756936	0.00190674	Dn	0.147279	0.617359	DN_reversed	0.0030077	FALSE					Syde2	2.59989	3.85125e-26	29	TSS	TRUE
Gm6088	156.748	60.5988	143.927	-1.19951	1.00315e-05	Dn	-0.119139	0.74072	DN_reversed	0.00428659	FALSE					Gm25627	2.21906	5.94193e-12	-1546	intergenic	TRUE
Gm6206	1556.71	1050.54	1393.43	-0.56272	5.78615e-09		-0.160552	0.133811	DN_reversed	0.0300276	FALSE					Gng5	2.12381	2.68168e-12	892	TSS	TRUE
Gm6223	400.243	222.313	425.884	-0.817925	3.41188e-07	Dn	0.0799642	0.705097	DN_reversed	0.00119608	FALSE					Rpf1	2.48968	1.00679e-14	328	TSS	TRUE
Gm6265	716.85	1272.18	865.566	0.816809	4.66961e-12	Up	0.275322	0.0349292	UP_reversed	9.76897e-05	FALSE					Prkacb	2.86334	8.08598e-22	459	TSS	TRUE
Gm6394	903.579	1645.73	1079.86	0.841547	2.26106e-09	Up	0.252416	0.119655	UP_reversed	0.00922073	FALSE					Gm43573	2.97131	1.83012e-45	-52	TSS	TRUE
Gm6445	435.716	188.779	617.076	-1.12354	3.55918e-08	Dn	0.472122	0.0222566	DN_reversed	5.96648e-07	FALSE					Dnajb4	4.26623	7.47784e-46	278	TSS	TRUE
Gm6493	1543.91	904.764	1344.71	-0.753015	6.73425e-09	Dn	-0.200328	0.177886	DN_reversed	0.0035845	FALSE					Usp33	2.05989	7.5208e-10	1221	TSS	TRUE
Gm6501	2074.12	1002.48	2052.48	-1.03061	1.88776e-19	Dn	-0.0182586	0.921026	DN_reversed	1.08267e-09	FALSE					AI115009	2.5313	4.91079e-14	286	TSS	TRUE
Gm6645	285.503	67.2966	224.539	-1.89952	1.16297e-17	Dn	-0.342477	0.128769	DN_reversed	3.77539e-06	FALSE					Gm24494	2.0696	6.89292e-23	-310	TSS	TRUE
Gm6733	899.596	553.298	746.122	-0.693873	3.10678e-07	Dn	-0.269137	0.0623864	DN_reversed	0.00168785	FALSE					Acadm	2.81198	6.99044e-29	1231	TSS	TRUE
Gm6768	677.036	389.574	668.87	-0.76572	1.91954e-06	Dn	-0.0232347	0.92626	DN_reversed	0.0016601	FALSE					Tyw3	2.49443	2.43857e-10	-205	TSS	TRUE
Gm6871	175.463	71.9555	211.8	-1.16209	2.06308e-07	Dn	0.256715	0.274427	DN_reversed	6.57456e-05	FALSE					Fpgt	2.65372	1.73005e-10	2	TSS	TRUE
Gm6977	689.17	1489.28	1150.04	1.07899	1.92946e-13	Up	0.720855	1.38879e-06	UP_reversed	0.0297919	FALSE					Gm43159	3.18332	3.3852e-26	-10	TSS	TRUE
Gm7160	211.136	609.015	471.413	1.49108	4.65654e-26	Up	1.13458	6.54634e-16	UP_reversed	0.0307157	FALSE					Cth	3.07606	2.36301e-16	176	TSS	TRUE
Gm7236	803.524	348.421	734.983	-1.16243	4.5432e-18	Dn	-0.128512	0.426943	DN_reversed	6.68309e-10	FALSE					Ankrd13c	2.91875	9.37281e-28	85	TSS	TRUE
Gm7266	907.261	1852.64	1297.36	1.01392	5.48343e-20	Up	0.51157	7.52399e-06	UP_reversed	0.000257778	FALSE					Wls	2.9094	2.68445e-18	262	TSS	TRUE
Gm7327	1318.63	716.236	1256.37	-0.865228	1.04377e-17	Dn	-0.0715522	0.586835	DN_reversed	6.39167e-08	FALSE					Vmn1r2	2.47809	2.01669e-11	6016	intergenic	TRUE
Gm7389	998.254	806.335	1167.99	-0.301373	0.00716565		0.224196	0.040319	DN_reversed	0.0114636	FALSE					Tgs1	4.14358	1.01498e-19	224	TSS	TRUE
Gm7436	252.806	368.33	193.918	0.519223	0.00986248		-0.346464	0.106312	UP_reversed	0.0180196	FALSE					Plag1	10.9911	1.34477e-243	281	TSS	TRUE
Gm7536	2203.93	4586.04	3213.99	1.03421	1.07245e-15	Up	0.534446	6.81716e-05	UP_reversed	0.00824462	FALSE					Ubxn2b	4.27951	8.34771e-20	501	TSS	TRUE
Gm7729	630.179	361.358	497.503	-0.782269	2.8076e-07	Dn	-0.327989	0.0384307	DN_reversed	0.000217477	FALSE					Gm25677	4.29704	2.54423e-45	-79	TSS	TRUE
Gm773	4502.52	1810.77	3128.13	-1.3003	2.05854e-50	Dn	-0.52177	1.6402e-09	DN_reversed	4.76527e-09	FALSE					Plekhf2	3.2124	1.18956e-13	-124	TSS	TRUE
Gm7809	2408.49	1323.78	2007.35	-0.849506	6.21299e-17	Dn	-0.261938	0.0151987	DN_reversed	0.0326073	FALSE					Trp53inp1	2.55862	3.18725e-19	-831	TSS	TRUE
Gm7862	905.775	467.043	633.938	-0.923423	2.64114e-12	Dn	-0.50253	0.000111549	DN_reversed	0.00544038	FALSE					Ccne2	3.00028	1.65308e-26	-354	TSS	TRUE
Gm7910	334.781	194.974	565.799	-0.751441	4.12007e-06	Dn	0.728969	3.49437e-07	DN_reversed	2.2326e-05	FALSE					Ints8	2.19822	1.99958e-11	1057	TSS	TRUE
Gm7964	14361.9	10348.7	11480.8	-0.469763	5.69659e-12		-0.321305	3.47145e-06	DN_reversed	0.00652547	FALSE					1110037F02Rik	2.2611	3.2073e-19	1741	TSS	TRUE
Gm7967	241.25	499.548	546.486	1.01357	9.87843e-11	Up	1.14046	4.99241e-14	UP_reversed	0.0184729	FALSE					Fsbp	3.99888	2.35338e-17	127	TSS	TRUE
Gm8116	753.635	411.181	657.359	-0.845116	3.30127e-09	Dn	-0.189052	0.247876	DN_reversed	6.29206e-05	FALSE					Pdp1	4.30957	6.63268e-53	551	TSS	TRUE
Gm8129	1135.32	2350.31	1369.73	1.03311	2.68945e-21	Up	0.269927	0.0267557	UP_reversed	7.15012e-06	FALSE					Gm11840	2.19058	3.60333e-12	942	TSS	TRUE
Gm8185	73.9189	127.326	61.9932	0.712485	0.0102749		-0.212551	0.544142	UP_reversed	0.0482803	FALSE					Triqk	9.00333	3.0645e-45	141	TSS	TRUE
Gm8258	730.187	560.761	1136.78	-0.369827	0.034374		0.615685	7.65591e-05	DN_reversed	0.0362827	FALSE					Otud6b	4.67706	8.96936e-28	286	TSS	TRUE
Gm8276	4060.99	2601.62	3915.18	-0.637759	5.5601e-18	Dn	-0.0535605	0.593467	DN_reversed	2.50429e-06	FALSE					Tmem55a	2.30705	2.83847e-08	223	TSS	TRUE
Gm8292	2147.15	2697.49	1749.49	0.327034	0.0022579		-0.287727	0.00772856	UP_reversed	0.0496619	FALSE					Tmem64	3.78842	3.51205e-20	268	TSS	TRUE
Gm8666	378.036	162.932	249.7	-1.15234	2.34198e-09	Dn	-0.573551	0.00254736	DN_reversed	0.00531644	FALSE					Nbn	4.15089	4.98209e-22	374	TSS	TRUE
Gm8692	556.929	1647.43	761.302	1.49536	4.58485e-16	Up	0.437078	0.034383	UP_reversed	5.99123e-05	FALSE					Osgin2	5.70016	2.03355e-27	-312	TSS	TRUE
Gm8806	1803.87	1085.03	1410.96	-0.728616	3.15019e-16	Dn	-0.351983	6.89896e-05	DN_reversed	0.000443289	FALSE					Ripk2	6.69669	4.58653e-65	346	TSS	TRUE
Gm8822	2442.03	1645.2	2515.66	-0.564067	2.709e-11		0.0403581	0.737776	DN_reversed	6.49903e-06	FALSE					Cpne3	6.43095	6.56284e-26	207	TSS	TRUE
Gm8930	50.3783	122.656	60.2536	1.12427	0.000122557	Up	0.203858	0.607779	UP_reversed	0.0362641	FALSE					Wwp1	4.81069	3.2281e-23	-307	TSS	TRUE
Gm9294	2428.86	4704.64	4118.01	0.941722	1.25243e-24	Up	0.751983	3.12088e-16	UP_reversed	0.00446238	FALSE					Ccnc	3.4201	2.58404e-16	-126	TSS	TRUE
Gm9320	50.8596	232.574	125.203	2.00452	7.88487e-16	Up	1.19227	3.39531e-06	UP_reversed	0.0174613	FALSE					Pnisr	3.19599	1.98588e-18	116	TSS	TRUE
Gm9333	1192.76	852.891	947.512	-0.474146	0.000244416		-0.323005	0.013599	DN_reversed	0.0239998	FALSE					Faxc	2.06083	4.89024e-10	342	TSS	TRUE
Gm9392	792.469	610.976	956.174	-0.359875	0.0028097		0.268661	0.0205595	DN_reversed	0.00522657	FALSE					Fbxl4	3.25724	2.3751e-15	756	gene_body	TRUE
Gm9761	2132.49	1296.06	1603.4	-0.706476	5.04983e-13	Dn	-0.403995	3.64858e-05	DN_reversed	0.0030472	FALSE					Mms22l	7.36636	8.86475e-26	148	TSS	TRUE
Gm9769	7180.45	4302.39	7670.31	-0.733339	8.3912e-23	Dn	0.0934743	0.311483	DN_reversed	3.24998e-14	FALSE					Ufl1	5.78786	8.33321e-24	220	TSS	TRUE
Gm9770	1099.23	870.257	1285.43	-0.328965	0.0133325		0.224436	0.0957159	DN_reversed	0.0390692	FALSE					Manea	3.4201	2.03342e-13	190	TSS	TRUE
Gm9794	27573.7	51815.9	39214.3	0.899563	9.2378e-22	Up	0.502373	1.90648e-07	UP_reversed	0.00172793	FALSE					Map3k7	3.0167	8.77764e-18	-397	TSS	TRUE
Gm9797	959.919	724.492	936.521	-0.398899	0.00182091		-0.0317095	0.863803	DN_reversed	0.0371547	FALSE					Bach2	2.3853	2.79217e-14	-104	TSS	TRUE
Gm9800	3209.26	1658.8	2439.39	-0.935774	8.70712e-16	Dn	-0.387226	0.00141098	DN_reversed	6.66644e-06	FALSE					Casp8ap2	5.09553	2.29479e-34	26	TSS	TRUE
Gm9833	1754.77	781.946	1235.15	-1.1512	5.20906e-29	Dn	-0.502746	5.76994e-07	DN_reversed	5.35335e-06	FALSE					Lyrm2	2.61136	1.49819e-11	620	TSS	TRUE
Gm9843	16646.1	35121.4	24367.1	1.05551	1.47834e-17	Up	0.538946	2.80105e-05	UP_reversed	0.000873153	FALSE					Gm11934	5.74738	5.60538e-30	36	TSS	TRUE
Gm9855	839.933	468.194	587.108	-0.816855	1.29268e-11	Dn	-0.504287	1.56845e-05	DN_reversed	0.0110964	FALSE					Akirin2	2.6098	8.24752e-11	562	TSS	TRUE
Gm9923	302.717	170.747	299.881	-0.78789	1.26976e-05	Dn	-0.0250425	0.925596	DN_reversed	0.000489567	FALSE					Mob3b	2.53219	2.19426e-12	583	TSS	TRUE
Gm9987	92.1466	17.7696	36.15	-1.88626	1.91153e-08	Dn	-1.18458	0.000152688	DN_reversed	0.0325721	FALSE					Gm12367	6.24825	2.52598e-42	67	TSS	TRUE
Gmfb	6800.61	3420.05	6023.96	-0.983002	4.03382e-30	Dn	-0.174407	0.0748363	DN_reversed	1.50927e-10	TRUE					Aco1	2.903	7.07566e-44	-1481	TSS	TRUE
Gmnn	2278.74	3835.25	2753.68	0.742468	4.02269e-16	Up	0.271011	0.00580662	UP_reversed	0.009951	TRUE					Toporsos	2.50807	3.67337e-21	-579	TSS	TRUE
Gmps	10116.8	8646.62	11708.1	-0.224908	0.0052923		0.208701	0.00919161	DN_reversed	0.0094737	TRUE					Dnaja1	4.29955	3.67965e-44	-222	TSS	TRUE
Gna11	6238.4	3678.37	3730.49	-0.75729	1.67189e-25	Dn	-0.736282	5.68928e-25	DN_reversed	0.0267493	FALSE					Smu1	5.96325	1.24445e-36	522	TSS	TRUE
Gnai3	11771.5	7329.14	13649.4	-0.678613	1.83207e-17	Dn	0.211282	0.0148461	DN_reversed	5.68405e-15	TRUE					Gm12396	2.73608	1.31277e-28	1063	TSS	TRUE
Gnaq	3986.51	1766.97	2247.96	-1.1629	5.93108e-51	Dn	-0.821802	6.12709e-28	DN_reversed	2.65994e-05	FALSE					Gm25931	2.36314	1.11627e-32	-498	TSS	TRUE
Gng10	7378.84	3255.73	3990.62	-1.17067	5.628e-53	Dn	-0.880045	1.37227e-31	DN_reversed	6.66644e-06	FALSE					Bag1	4.20935	7.07564e-32	-6	TSS	TRUE
Gng12	7450.41	3700.56	4775.7	-1.00365	1.66229e-43	Dn	-0.637897	6.90905e-19	DN_reversed	3.14443e-07	FALSE					Nfx1	2.96568	1.2498e-18	893	TSS	TRUE
Gnl3l	8375.84	2848.66	5194.32	-1.53373	1.55472e-50	Dn	-0.681262	4.69151e-11	DN_reversed	5.54465e-07	TRUE					Ube2r2	3.28082	3.98998e-24	-143	TSS	TRUE
Gnptg	811.006	1802.51	1569.83	1.1362	1.60399e-30	Up	0.940257	8.95762e-22	UP_reversed	0.00468494	FALSE					Ubap2	3.53477	2.28528e-32	-456	TSS	TRUE
Golim4	6519.43	2682.68	5037	-1.27052	9.74826e-62	Dn	-0.370634	1.78972e-06	DN_reversed	3.36948e-12	FALSE					Ubap1	5.68262	1.34789e-33	3	TSS	TRUE
Golm1	4176.04	1909.9	2517.79	-1.11763	9.78686e-39	Dn	-0.725874	7.27885e-18	DN_reversed	0.009229	TRUE					Kif24	9.89197	1.15864e-199	239	TSS	TRUE
Golph3	4949.5	3025.31	6569.76	-0.705312	1.67377e-17	Dn	0.404493	1.05265e-06	DN_reversed	3.80473e-16	FALSE					AI464131	2.36314	3.47802e-17	-524	TSS	TRUE
Gon4l	2520.59	1373.62	1630.92	-0.860358	3.66035e-15	Dn	-0.622173	9.9357e-09	DN_reversed	0.007691	FALSE					Dnaic1	2.41419	2.47423e-26	424	TSS	TRUE
Gopc	2763.09	1295.61	1570.06	-1.07976	2.10839e-31	Dn	-0.809145	2.64899e-19	DN_reversed	0.00108852	TRUE					Dctn3	2.59796	3.38476e-13	169	TSS	TRUE
Gosr2	5860.84	4119.91	3791.79	-0.505879	1.09917e-11		-0.624841	9.99128e-18	DN_reversed	0.0467856	FALSE					Arid3c	2.04454	1.84497e-19	-8058	gene_body	TRUE
Gpam	1722.37	487.192	764.91	-1.75925	2.36942e-30	Dn	-1.14365	2.53318e-14	DN_reversed	0.0182187	TRUE					Dnajb5	3.66836	1.23546e-123	185	TSS	TRUE
Gpnmb	6783.97	9566.24	9025.9	0.492478	2.97032e-12		0.408987	7.69943e-09	UP_reversed	0.0119424	TRUE					Vcp	9.63941	4.73248e-137	206	TSS	TRUE
Gpr137b	1680.33	4010.71	4613.74	1.24455	8.87129e-49	Up	1.44525	2.92903e-67	UP_reversed	1.58506e-09	FALSE					Fancg	2.07769	1.13505e-08	787	TSS	TRUE
Gpr137b-ps	415.697	759.624	966.546	0.862803	5.89889e-14	Up	1.20382	1.83231e-28	UP_reversed	0.00119001	FALSE					Gm26643	2.07837	7.38566e-09	-99	TSS	TRUE
Gpr149	1367.07	1073.66	2019.26	-0.342557	0.0103492		0.551973	5.65236e-06	DN_reversed	0.00564233	FALSE					Stoml2	3.03862	2.60941e-45	-6890	gene_body	TRUE
Gpr155	532.246	188.494	301.801	-1.42456	5.0319e-16	Dn	-0.8016	1.77581e-06	DN_reversed	0.0080821	TRUE					Gm26881	3.53477	2.28528e-32	-866	TSS	TRUE
Gpr161	1739.81	1363.81	1962.75	-0.345713	0.002818		0.168454	0.178783	DN_reversed	0.00556059	FALSE					Rusc2	4.15673	2.46323e-24	520	TSS	TRUE
Gps2	1409.17	2816.5	1811.07	0.990269	2.67683e-31	Up	0.359468	5.692e-05	UP_reversed	6.34283e-05	FALSE					Fam166b	4.43485	6.37516e-20	7633	gene_body	TRUE
Gpt2	2793.07	4849.14	4656.65	0.789858	1.73603e-25	Up	0.732289	1.64517e-22	UP_reversed	1.26564e-05	TRUE					Fam166b	3.32539	9.25938e-19	3233	gene_body	TRUE
Gpx4	2604.43	3846.93	2713.47	0.553829	5.896e-07		0.0602371	0.706157	UP_reversed	0.0290005	FALSE					Tesk1	3.37474	3.5034e-22	1060	gene_body	TRUE
Grb10	24043.9	14300.4	16108.2	-0.741292	1.45688e-15	Dn	-0.571863	1.08359e-09	DN_reversed	0.0159823	FALSE					Ccdc107	3.05774	4.77415e-31	537	TSS	TRUE
Grcc10	874.676	1232.09	668.606	0.491818	1.26848e-05		-0.376928	0.00114986	UP_reversed	0.000136571	FALSE					Tpm2	2.46207	5.51023e-18	794	TSS	TRUE
Grem2	868.076	1072.95	2277.73	0.300554	0.0181979		1.36655	3.59062e-36	UP_reversed	0.036204	FALSE					Msmp	2.07091	7.97989e-35	1293	TSS	TRUE
Grn	11556.1	21400	17035	0.877769	2.12081e-19	Up	0.553259	2.71666e-08	UP_reversed	7.86431e-06	FALSE					Npr2	2.07932	1.39241e-16	564	TSS	TRUE
Gsk3b	3852.36	2173.53	3280.98	-0.815744	7.35757e-17	Dn	-0.229655	0.0315389	DN_reversed	0.0015784	TRUE					Spag8	2.0015	1.10869e-09	1551	gene_body	TRUE
Gspt1	16232.9	9169.33	11594.5	-0.818774	7.86907e-36	Dn	-0.482477	2.58665e-13	DN_reversed	4.67057e-10	TRUE					Hint2	3.49376	1.48424e-97	-2334	TSS	TRUE
Gsr	3520.43	2384.7	2962.1	-0.556591	2.20805e-09		-0.244868	0.0128503	DN_reversed	0.0468467	TRUE					Fam221b	2.39168	5.23413e-11	-259	TSS	TRUE
Gsta4	2898.87	4543.71	6341.01	0.630904	1.9651e-05	Up	1.09971	1.0038e-14	UP_reversed	0.000904105	FALSE					Olfr155	2.0696	2.80251e-12	8434	intergenic	TRUE
Gstm1	1313.16	1732.7	1486.83	0.392321	0.00175603		0.178437	0.203578	UP_reversed	0.00448594	FALSE					Reck	2.20257	4.70532e-11	-830	TSS	TRUE
Gsto2	126.733	1153.09	686.566	3.08292	1.56196e-86	Up	2.36237	3.39973e-51	UP_reversed	0.000116383	FALSE					Clta	3.40462	3.37386e-26	8147	gene_body	TRUE
Gstp-ps	1334.68	1732.51	1221.93	0.366626	0.0107286		-0.120388	0.492231	UP_reversed	0.0179803	FALSE					Gm22706	4.3221	4.66746e-36	8599	gene_body	TRUE
Gt(ROSA)26Sor	918.126	340.069	917.047	-1.39921	2.3171e-26	Dn	-0.00570992	0.977896	DN_reversed	4.0039e-15	FALSE					Rnf38	4.27512	5.86717e-21	-111	TSS	TRUE
Gtf2e1	1344.18	1024.81	1318.73	-0.385181	0.000111742		-0.0297449	0.835807	DN_reversed	0.00838823	FALSE					Zcchc7	2.50704	9.99435e-13	-168	TSS	TRUE
Gtf3c1	6552.94	4295.93	5088.38	-0.605292	2.06615e-19	Dn	-0.362918	7.36129e-08	DN_reversed	0.0187825	TRUE					Zbtb5	8.89977	1.2914e-167	-88	TSS	TRUE
Gtf3c4	4118.39	2867.52	4606.34	-0.516815	4.93796e-09		0.159085	0.108388	DN_reversed	3.03931e-07	FALSE					Tomm5	2.71571	2.6791e-14	-486	TSS	TRUE
Gtf3c5	2029.97	3175.03	2432.29	0.636099	3.88971e-12	Up	0.259299	0.00831876	UP_reversed	0.0464181	TRUE					Exosc3	2.07279	1.48602e-07	231	TSS	TRUE
Gtpbp2	1410.97	2590.94	1994.25	0.865808	4.9943e-17	Up	0.491804	3.31894e-06	UP_reversed	6.36961e-05	FALSE					Slc25a51	4.27125	4.11138e-22	365	TSS	TRUE
Gulp1	752.926	191.103	428.987	-1.88924	2.52824e-32	Dn	-0.799299	7.02602e-08	DN_reversed	1.05371e-05	TRUE					Shb	2.34488	4.16117e-26	929	TSS	TRUE
Gxylt1	4641.41	3953.03	5528.56	-0.230164	0.0184659		0.248544	0.00835493	DN_reversed	0.0246352	TRUE					Tdrd7	4.50167	8.3013e-26	7665	gene_body	TRUE
Gxylt2	4678.79	1050.43	923.402	-2.10357	1.41935e-54	Dn	-2.28987	3.9124e-66	DN_reversed	0.00055478	FALSE					Tstd2	6.31403	2.18138e-35	-25	TSS	TRUE
H2afv	1817.5	3216.54	2598.32	0.810667	1.09157e-13	Up	0.510093	4.79614e-06	UP_reversed	0.00480544	TRUE					Trmo	3.27394	1.94005e-19	-382	TSS	TRUE
H2afx	1457.09	2197.16	1899.85	0.587392	1.11586e-07		0.381793	0.000776357	UP_reversed	0.00151157	FALSE					Anp32b	7.17503	1.20984e-37	1097	TSS	TRUE
H2-D1	11356.5	15582.4	13226.8	0.452877	2.89674e-08		0.218839	0.0123353	UP_reversed	0.0282575	FALSE					Nans	4.07781	9.86904e-28	-348	TSS	TRUE
H60b	3306.03	1302.35	2461.75	-1.32572	1.11695e-40	Dn	-0.422454	2.52243e-05	DN_reversed	9.48875e-07	FALSE					Coro2a	2.35869	1.51743e-09	5201	gene_body	TRUE
Hacd3	4261.33	1812.54	2376.31	-1.22372	1.27312e-45	Dn	-0.835993	3.94078e-23	DN_reversed	0.000108266	TRUE					Tgfbr1	6.3798	6.42713e-44	-522	TSS	TRUE
Hace1	1477.09	1026.88	1606.93	-0.516059	8.926e-07		0.116427	0.350892	DN_reversed	0.0314671	TRUE					Nr4a3	3.0429	4.14679e-47	1146	TSS	TRUE
Haus4	1268.85	1832.17	1193.28	0.523756	9.58048e-09		-0.0862039	0.469339	UP_reversed	0.000605026	TRUE					Stx17	4.82837	5.62739e-28	-26	TSS	TRUE
Hbegf	754.806	5531.53	4488.74	2.83866	6.33995e-215	Up	2.53956	1.41967e-173	UP_reversed	4.84659e-07	FALSE					Invs	5.38549	2.74677e-34	-102	TSS	TRUE
Hcfc1	13449.3	6662.76	9434.7	-1.00392	1.08615e-32	Dn	-0.507149	3.3319e-09	DN_reversed	0.000139245	TRUE					Tex10	16.4165	1.82616e-64	58	TSS	TRUE
Hdac2	11221.3	8451.29	9452.78	-0.405711	3.15815e-07		-0.245017	0.00296639	DN_reversed	0.00201726	TRUE					Tmeff1	2.90445	7.19534e-14	525	TSS	TRUE
Hdac5	2266.59	6288.87	5581.23	1.45824	2.35003e-69	Up	1.28883	5.12341e-55	UP_reversed	0.000210279	TRUE					Zfp189	2.07962	3.13274e-09	1223	TSS	TRUE
Hdgfrp2	5500.89	6692.9	4748.09	0.280145	0.000974808		-0.209547	0.0166831	UP_reversed	0.00549644	FALSE					Rnf20	3.43154	1.27398e-18	39	TSS	TRUE
Hdgfrp3	3130.6	2209.98	3338.06	-0.496739	3.14352e-08		0.0903464	0.420634	DN_reversed	2.77866e-07	TRUE					Smc2	2.36776	2.8024e-08	456	TSS	TRUE
Hdlbp	32808.6	25683.4	28856.7	-0.35132	1.94483e-07		-0.184257	0.0101676	DN_reversed	0.00218384	FALSE					Nipsnap3b	3.25567	2.00577e-22	619	TSS	TRUE
Heatr1	6079.5	3812.94	5706.09	-0.665409	1.12188e-12	Dn	-0.0914434	0.451585	DN_reversed	9.22781e-07	FALSE					Slc44a1	2.56894	1.57199e-13	-613	TSS	TRUE
Heatr3	8642.55	3420.41	4479.22	-1.32606	1.09097e-66	Dn	-0.942221	1.65507e-35	DN_reversed	1.54488e-12	FALSE					Fktn	2.06172	3.18306e-10	801	TSS	TRUE
Hectd1	8344.35	4901.71	7642.31	-0.754956	2.58597e-11	Dn	-0.125551	0.383393	DN_reversed	0.000181566	TRUE					Zfp462	2.18775	5.65332e-26	-476	TSS	TRUE
Hectd2	1078.76	687.406	1413.45	-0.628191	6.92241e-05	Dn	0.375416	0.0201078	DN_reversed	0.000100239	TRUE					Rad23b	3.11126	2.72518e-68	-43	TSS	TRUE
Hecw2	7.70207	42.2593	47.6738	1.81697	4.92872e-06	Up	1.99664	2.20791e-07	UP_reversed	0.0246906	FALSE					Klf4	3.38694	1.80171e-86	465	TSS	TRUE
Hells	13121	9398.23	19401.8	-0.476949	5.53225e-08		0.558507	9.39218e-11	DN_reversed	9.96924e-08	FALSE					Gm26889	2.10468	3.04718e-08	6552	gene_body	TRUE
Herc4	3495.08	2902.69	4198.63	-0.265131	0.0050619		0.2607	0.00463019	DN_reversed	0.00780024	FALSE					Megf9	2.29601	3.97604e-95	-2472	TSS	TRUE
Hes6	178.915	384.071	253.851	1.06816	4.4441e-10	Up	0.499295	0.00598819	UP_reversed	0.00041479	FALSE					A230083N12Rik	2.52041	2.41704e-28	-386	TSS	TRUE
Hexa	3224.62	6950.03	5908.74	1.09549	6.22626e-32	Up	0.864804	2.07315e-20	UP_reversed	0.00264445	FALSE					Tmem261	4.40666	3.18375e-22	304	TSS	TRUE
Hif1a	6763.5	4396.75	7240.63	-0.614693	9.63945e-11	Dn	0.0960953	0.43095	DN_reversed	2.2642e-07	TRUE					Cntln	2.39282	2.1101e-25	90	TSS	TRUE
Higd2a	1121.48	1906.85	1332.87	0.752753	3.77213e-11	Up	0.248452	0.0504322	UP_reversed	0.000491608	TRUE					Dennd4c	2.16971	1.27464e-38	544	TSS	TRUE
Hip1r	2439.3	5696.99	4213.99	1.2147	8.36768e-57	Up	0.783096	2.32259e-24	UP_reversed	0.000635629	FALSE					Gm12631	2.12707	3.36974e-38	1498	TSS	TRUE
Hipk2	2421.68	1042.69	1489.09	-1.17568	4.30998e-14	Dn	-0.682995	1.57833e-05	DN_reversed	6.58785e-06	FALSE					Gm26566	2.5709	3.2981e-29	-505	TSS	TRUE
Hipk3	5761.66	2699.67	5809.85	-1.08172	2.07957e-33	Dn	0.010761	0.94347	DN_reversed	1.69345e-20	FALSE					Plaa	2.29093	1.35264e-29	243	TSS	TRUE
Hira	3947.93	2817.08	3533.99	-0.481334	2.7441e-09		-0.157162	0.0794258	DN_reversed	0.00385274	FALSE					Efcab7	2.42682	3.97477e-16	-1694	gene_body	TRUE
Hirip3	5634.55	6908.3	4206.79	0.291847	0.000103653		-0.419853	8.61931e-09	UP_reversed	0.0177321	TRUE					Ror1	2.72749	7.98356e-22	1608	gene_body	TRUE
Hist1h4d	26.5158	153.503	85.5099	2.24371	2.93487e-14	Up	1.49071	7.99629e-07	UP_reversed	0.0187253	FALSE					Leprot	2.71066	3.43258e-146	1581	TSS	TRUE
Hk2	5972.62	3628.17	5182.49	-0.714611	7.28529e-22	Dn	-0.202791	0.0110237	DN_reversed	1.19028e-06	TRUE					Wdr78	2.36968	4.95058e-77	-3245	TSS	TRUE
Hmcn2	31.4177	72.5365	51.8883	1.04981	0.00149761	Up	0.621183	0.0761855	UP_reversed	0.00195647	FALSE					Slc35d1	2.1542	6.85743e-19	-36	TSS	TRUE
Hmg20b	1827.77	2334.56	2207.27	0.351295	0.000247863		0.271681	0.00500624	UP_reversed	0.0329013	FALSE					Ndc1	2.82962	4.19742e-22	415	TSS	TRUE
Hmgb1	1431.19	979.824	1141.88	-0.544186	3.38862e-07		-0.321926	0.00278569	DN_reversed	0.00154205	TRUE					Scp2	2.83674	1.08135e-22	431	TSS	TRUE
Hmgcs1	15365.9	1928.68	3034.69	-2.96771	1.08528e-290	Dn	-2.32197	2.2888e-191	DN_reversed	3.77539e-06	TRUE					Zyg11a	2.08228	3.648e-10	5321	gene_body	TRUE
Hmgxb3	2247.7	1334.79	2021.79	-0.737461	4.3574e-13	Dn	-0.151524	0.200585	DN_reversed	0.000284756	TRUE					Prpf38a	2.6098	6.03376e-29	435	TSS	TRUE
Hmmr	7177.68	4085.94	5377.61	-0.7982	2.25941e-11	Dn	-0.410204	0.000997958	DN_reversed	0.0240559	FALSE					Zfyve9	2.07482	7.99382e-27	-2	TSS	TRUE
Hn1l	8309.48	4373.47	4723.15	-0.919684	1.70421e-37	Dn	-0.810806	2.92844e-30	DN_reversed	0.0384673	TRUE					Kti12	2.31333	3.19479e-31	-85	TSS	TRUE
Hnrnpa1	7136.62	5483.64	6771.59	-0.377926	2.85195e-06		-0.0750382	0.466904	DN_reversed	2.06096e-05	FALSE					9630013D21Rik	3.22278	5.51724e-32	526	TSS	TRUE
Hnrnpa2b1	77686.4	59515.3	70321.5	-0.382128	5.07903e-08		-0.142858	0.0687771	DN_reversed	5.47466e-05	FALSE					Cdkn2c	2.79724	3.72813e-53	2988	TSS	TRUE
Hnrnpa3	4489.23	3204.54	3389.2	-0.484309	3.35546e-11		-0.403077	2.39659e-08	DN_reversed	0.00856707	TRUE					Faf1	3.12651	4.31051e-42	1111	TSS	TRUE
Hnrnpab	29826.6	19014.3	21784.3	-0.641916	5.56878e-12	Dn	-0.447945	2.40287e-06	DN_reversed	0.000239518	TRUE					Spata6	2.22349	1.30984e-15	1215	TSS	TRUE
Hnrnph2	5696.63	3673.9	5952.3	-0.629049	1.52181e-16	Dn	0.062069	0.544056	DN_reversed	1.78597e-11	FALSE					Foxd2	2.51559	4.70888e-36	972	TSS	TRUE
Hnrnpll	6747.59	5053.24	6053.96	-0.41346	1.49363e-08		-0.154522	0.0536917	DN_reversed	0.000329909	TRUE					Cmpk1	2.5077	6.10661e-17	-59	TSS	TRUE
Hnrnpr	5934.56	2934.22	4563.32	-1.00439	5.45149e-25	Dn	-0.375941	0.000198357	DN_reversed	1.71728e-05	TRUE					Stil	3.13509	5.38086e-30	-459	TSS	TRUE
Hnrnpu	50208.6	43148.5	53068.2	-0.217337	0.00147771		0.079582	0.323862	DN_reversed	0.00449037	TRUE					Tal1	2.19147	1.81148e-22	2273	TSS	TRUE
Hnrnpul1	8818.96	5545.58	6612.36	-0.663141	3.99339e-15	Dn	-0.412086	1.56921e-06	DN_reversed	0.01834	TRUE					Efcab14	2.24148	9.81824e-25	1326	TSS	TRUE
Homer1	1196.1	526.898	1183.34	-1.16093	1.79035e-22	Dn	-0.0200758	0.912959	DN_reversed	5.32342e-10	TRUE					Ipp	2.06709	1.56583e-11	-452	TSS	TRUE
Hook2	438.054	1230.34	1035.26	1.46587	2.35209e-40	Up	1.22026	4.28808e-29	UP_reversed	0.00273911	TRUE					Tmem69	2.01842	2.57498e-31	1035	TSS	TRUE
Hook3	2718.58	1642.17	2758.53	-0.711821	5.19812e-08	Dn	0.0179533	0.932924	DN_reversed	0.000226685	TRUE					Nasp	4.61024	1.22606e-60	396	TSS	TRUE
Hoxd3	868.121	296.385	290.235	-1.50391	2.06908e-23	Dn	-1.53813	1.75916e-26	DN_reversed	0.00192334	TRUE					Gm25137	2.23622	7.67585e-11	-4253	intergenic	TRUE
Hprt	6494.62	4577.12	5626.84	-0.501429	2.71118e-10		-0.205539	0.0156689	DN_reversed	0.0391016	FALSE					Ccdc163	2.3431	1.36004e-35	-869	TSS	TRUE
Hs2st1	7686.68	4847.63	7177.81	-0.657329	9.0672e-14	Dn	-0.0985297	0.379041	DN_reversed	9.23718e-05	FALSE					Kdm4a	2.86879	1.28595e-75	1442	TSS	TRUE
Hs6st1	2204.88	1489.41	2386.52	-0.559518	9.27513e-11		0.114817	0.254708	DN_reversed	2.81021e-09	FALSE					Ybx1	2.60198	2.2775e-87	-296	TSS	TRUE
Hs6st2	2027.53	343.918	547.543	-2.5227	9.23929e-118	Dn	-1.87039	3.87862e-82	DN_reversed	1.79738e-09	FALSE					Ctps	3.52843	2.68234e-68	375	TSS	TRUE
Hsbp1	4047.41	5334.98	4034.33	0.393633	5.3703e-05		-0.00305769	0.98534	UP_reversed	0.00893313	FALSE					Nfyc	2.46608	2.90169e-32	6771	gene_body	TRUE
Hscb	182.859	323.931	301.408	0.793217	1.74164e-05	Up	0.693474	0.000134305	UP_reversed	0.0362388	FALSE					Exo5	3.33613	6.15765e-34	-595	TSS	TRUE
Hsd17b12	8896.86	5962.79	7211.87	-0.573493	2.13588e-14		-0.300981	9.74052e-05	DN_reversed	0.0422677	TRUE					Zfp69	2.04713	1.8529e-23	2198	TSS	TRUE
Hsd17b7	3268.31	796.029	929.049	-2.00474	1.92005e-83	Dn	-1.79584	5.27197e-73	DN_reversed	0.00106115	TRUE					Zmpste24	2.87639	6.37316e-16	240	TSS	TRUE
Hsd3b7	193.499	746.451	581.113	1.87307	3.10286e-36	Up	1.53055	4.87782e-25	UP_reversed	1.07879e-07	FALSE					Rlf	2.13098	2.67223e-17	1683	TSS	TRUE
Hspa13	2729.38	1391.01	2762.43	-0.960734	2.20848e-21	Dn	0.0142563	0.931333	DN_reversed	1.45571e-11	FALSE					Cap1	2.61965	1.56548e-53	1355	TSS	TRUE
Hspa14	5361.48	4692	5388.82	-0.19096	0.0171805		0.00715954	0.953555	DN_reversed	0.0300276	TRUE					Bmp8b	2.07279	1.48602e-07	-2465	intergenic	TRUE
Hspa1a	35.0867	845.087	581.942	4.34212	1.24405e-88	Up	3.82627	2.17628e-69	UP_reversed	0.0366829	TRUE					Mycbp	2.27305	9.309e-20	-532	TSS	TRUE
Hspa1b	614.187	16279.4	11007.6	4.681	0	Up	4.12108	0	UP_reversed	2.12504e-05	TRUE					Gm12905	4.22218	1.48149e-97	-31	TSS	TRUE
Hspa4	36671.7	24627.2	26219.7	-0.57141	7.76958e-19		-0.48145	1.00596e-13	DN_reversed	3.2415e-05	TRUE					Utp11l	2.51453	9.69893e-33	2199	TSS	TRUE
Hspb11	831.34	1471.73	1285.93	0.811184	4.35437e-13	Up	0.621884	2.80998e-08	UP_reversed	0.00308478	FALSE					Fhl3	2.37857	6.24072e-22	-20	TSS	TRUE
Hspd1	40933	30419.9	39357.1	-0.425292	1.54918e-08		-0.0564439	0.583072	DN_reversed	0.000636521	TRUE					Fhl3	2.06143	6.64288e-40	6779	gene_body	TRUE
Hspd1-ps3	16582.1	10680.8	15881.2	-0.62799	4.20417e-12	Dn	-0.0622112	0.625516	DN_reversed	4.41309e-05	FALSE					Gm12915	2.9094	4.01627e-93	-2146	TSS	TRUE
Hus1	2162.67	1378.16	1688.84	-0.644422	1.03926e-12	Dn	-0.355985	8.34309e-05	DN_reversed	0.0104058	TRUE					Mtf1	3.47516	3.42641e-34	695	TSS	TRUE
Huwe1	30154.4	15086.6	21113.9	-0.978837	2.7543e-15	Dn	-0.504137	9.25591e-05	DN_reversed	0.0215254	TRUE					1110065P20Rik	2.59508	1.54804e-38	-704	TSS	TRUE
Hykk	366.463	125.616	256.154	-1.45303	1.1509e-12	Dn	-0.507379	0.0128362	DN_reversed	0.0174795	TRUE					Gnl2	3.13254	5.26006e-27	707	TSS	TRUE
Hyls1	796.249	1105.15	714.53	0.466409	2.67682e-05		-0.155736	0.231039	UP_reversed	0.0333556	FALSE					Grik3	2.13656	1.11148e-14	1699	gene_body	TRUE
Hypk	7028.86	9533.83	5641.93	0.434397	1.63383e-05		-0.311981	0.00273074	UP_reversed	0.000239318	TRUE					Thrap3	2.07028	9.26487e-29	-1840	TSS	TRUE
Iah1	390.136	567.148	482.244	0.529957	0.000992973		0.301953	0.0768796	UP_reversed	0.0436229	FALSE					Zmym4	2.16314	9.10302e-13	-165	TSS	TRUE
Ibtk	2371.87	1175.2	1765.62	-0.996276	3.35331e-20	Dn	-0.422954	0.000117601	DN_reversed	0.0367349	TRUE					Csmd2	2.52072	7.37499e-16	955	TSS	TRUE
Ice1	6000.73	3416.46	4825.19	-0.800458	1.16383e-13	Dn	-0.311181	0.00690813	DN_reversed	0.000751315	FALSE					Ak2	3.01099	2.13213e-113	-324	TSS	TRUE
Ice2	985.979	542.618	675.283	-0.844767	4.79471e-11	Dn	-0.543955	1.5941e-05	DN_reversed	0.017391	FALSE					S100pbp	2.48629	1.78579e-30	26	TSS	TRUE
Idh3a	6588.82	3917.84	5099.36	-0.744945	2.6559e-26	Dn	-0.368139	2.01436e-07	DN_reversed	2.71373e-05	TRUE					Rbbp4	2.13838	2.41689e-57	2169	TSS	TRUE
Idnk	232.911	379.061	256.433	0.684443	2.1029e-05	Up	0.136009	0.51345	UP_reversed	0.0178564	FALSE					Hdac1	5.08129	1.79053e-61	512	TSS	TRUE
Ids	3306.92	631.052	1230.54	-2.34329	2.06005e-80	Dn	-1.40441	1.43877e-32	DN_reversed	2.52597e-06	FALSE					Hdac1	2.10468	1.68994e-07	-8487	gene_body	TRUE
Ier2	819.05	4793.84	3899.74	2.51796	1.87629e-137	Up	2.22526	2.0773e-108	UP_reversed	0.00475053	TRUE					Eif3i	2.47609	6.07204e-23	347	TSS	TRUE
Ier5	3045.36	11639.7	7348.13	1.91116	3.43058e-83	Up	1.25618	1.95224e-36	UP_reversed	9.76485e-06	TRUE					Txlna	2.35899	3.88521e-34	2164	TSS	TRUE
Ifi211	438.388	134.923	320.603	-1.6189	1.12189e-21	Dn	-0.434662	0.00667343	DN_reversed	0.0124111	FALSE					Kpna6	2.23887	6.50112e-36	166	TSS	TRUE
Ifngr2	1342.95	3456.28	2751.14	1.35172	2.17321e-61	Up	1.02508	2.81842e-36	UP_reversed	5.14752e-07	TRUE					Khdrbs1	2.51304	1.90458e-45	1596	TSS	TRUE
Igf1r	4875.79	3389.7	3646.55	-0.51902	6.98158e-09		-0.416477	3.39531e-06	DN_reversed	0.00112686	TRUE					Pef1	2.44456	3.34866e-50	7541	gene_body	TRUE
Igf2	541.71	82.7758	36.7581	-2.5887	3.63928e-35	Dn	-3.66736	3.17346e-65	DN_reversed	0.0320281	FALSE					Serinc2	2.01698	2.71111e-13	4804	gene_body	TRUE
Igf2bp2	6708.35	5552.68	6369.3	-0.271679	0.000221785		-0.0743296	0.408057	DN_reversed	0.00679016	TRUE					Zcchc17	3.20327	2.66405e-58	442	TSS	TRUE
Igf2bp3	3101.14	1484.9	2224.79	-1.04562	5.89432e-24	Dn	-0.475331	5.48829e-06	DN_reversed	7.56346e-07	TRUE					Pum1	2.07769	1.19755e-15	-321	TSS	TRUE
Igfbp6	5291.72	11819.8	9769.81	1.14723	1.4687e-36	Up	0.875966	8.35925e-22	UP_reversed	2.75717e-10	TRUE					Mecr	3.2124	1.18956e-13	29	TSS	TRUE
Igflr1	815.03	1150.71	736.256	0.486598	0.000136111		-0.139279	0.371624	UP_reversed	0.0129698	FALSE					Srsf4	2.89393	3.42151e-15	782	TSS	TRUE
Ik	4336.34	5625.07	4479.36	0.37138	5.93739e-07		0.0456986	0.660869	UP_reversed	0.0137517	FALSE					Gm12978	2.79098	8.33368e-22	328	TSS	TRUE
Ikbip	3270.9	1276.55	1513.61	-1.34087	1.16189e-48	Dn	-1.10232	1.41921e-35	DN_reversed	0.00456733	TRUE					Gm10300	2.29955	1.86669e-08	202	TSS	TRUE
Ikzf5	104.619	41.4046	141.943	-1.20214	1.80328e-05	Dn	0.392465	0.159836	DN_reversed	8.26771e-05	FALSE					Ythdf2	4.20935	3.47074e-34	202	TSS	TRUE
Il11	31.4364	307.557	288.764	3.05541	1.33851e-38	Up	2.98888	4.66956e-38	UP_reversed	0.0010594	TRUE					Taf12	2.5364	8.9154e-15	24	TSS	TRUE
Il15	158.992	257.304	209.656	0.669506	0.000256811	Up	0.389487	0.041008	UP_reversed	0.0240953	FALSE					Trnau1ap	2.60315	2.01799e-15	-62	TSS	TRUE
Il1r1	1045.82	524.641	895.673	-0.974787	1.17863e-12	Dn	-0.224083	0.144656	DN_reversed	0.037359	FALSE					Rcc1	2.51923	1.4856e-12	5735	gene_body	TRUE
Il1rap	582.912	274.264	496.85	-1.06577	6.2604e-16	Dn	-0.230469	0.0910441	DN_reversed	0.0367307	FALSE					Phactr4	3.75181	1.7895e-22	588	TSS	TRUE
Il6st	18942.8	7935.07	8917.64	-1.23386	7.82372e-28	Dn	-1.06928	2.77949e-21	DN_reversed	0.0256414	TRUE					Med18	2.18562	5.65307e-10	-79	TSS	TRUE
Ilkap	2812.08	3954.32	2726.41	0.487787	6.1503e-11		-0.04309	0.690234	UP_reversed	0.0038078	TRUE					Gm12981	3.4238	1.63582e-53	248	TSS	TRUE
Immp1l	410.594	561.594	430.077	0.434862	0.00214002		0.0610599	0.755759	UP_reversed	0.00488972	TRUE					Atpif1	4.20935	1.43304e-14	158	TSS	TRUE
Impa1	5435.76	3263.8	3702.47	-0.731034	6.21601e-22	Dn	-0.550428	2.51484e-13	DN_reversed	0.0195901	FALSE					Eya3	4.14745	7.14024e-21	653	TSS	TRUE
Impad1	9871.68	3401.27	7145.56	-1.51819	6.42763e-56	Dn	-0.461773	3.31405e-06	DN_reversed	5.66649e-16	FALSE					Xkr8	2.94655	7.67938e-17	145	TSS	TRUE
Ing4	733.767	1064.11	796.988	0.523694	5.10484e-06		0.118247	0.408788	UP_reversed	0.0201119	FALSE					Rpa2	4.88585	6.73292e-24	-235	TSS	TRUE
Inhba	1025.63	669.692	1093.72	-0.599094	2.99273e-05		0.0874704	0.647393	DN_reversed	7.13377e-05	FALSE					Stx12	5.05122	4.29541e-27	-91	TSS	TRUE
Insr	1571.74	1214.81	1704.45	-0.364065	0.00129902		0.11264	0.398298	DN_reversed	0.00400907	TRUE					Fam76a	7.32252	7.90155e-83	157	TSS	TRUE
Ints2	4038.24	1786.15	2325.3	-1.14821	1.18182e-16	Dn	-0.779168	2.40435e-08	DN_reversed	0.0035216	FALSE					Ahdc1	3.35086	4.69082e-28	1093	TSS	TRUE
Ints7	5003.15	3343.1	3892.64	-0.578578	2.98166e-13		-0.358379	7.54066e-06	DN_reversed	0.0475712	TRUE					Wasf2	2.40534	9.49698e-16	-5	TSS	TRUE
Ints8	4644.69	2653.35	4112.94	-0.798101	1.32891e-19	Dn	-0.174796	0.0781988	DN_reversed	6.72045e-06	TRUE					Map3k6	6.52449	2.78887e-29	581	TSS	TRUE
Ip6k2	1240.41	2052.39	1928.95	0.718956	9.29179e-16	Up	0.632126	8.47529e-13	UP_reversed	0.00157261	TRUE					Slc9a1	2.61581	1.6289e-14	693	TSS	TRUE
Ipo11	4081.17	1544.19	2067.83	-1.38617	6.49672e-51	Dn	-0.973832	3.08732e-27	DN_reversed	0.000270795	TRUE					Fam46b	19.7606	2.327e-150	-32	TSS	TRUE
Ipo13	14876	8521.47	8996.22	-0.799153	2.53949e-33	Dn	-0.721072	8.33122e-28	DN_reversed	5.09903e-12	FALSE					Nudc	9.99721	9.045e-48	-4	TSS	TRUE
Ipo5	19798.6	13769.2	15845.2	-0.521117	8.84601e-16		-0.319947	1.30034e-06	DN_reversed	0.000129912	FALSE					Gpn2	4.76647	2.66458e-27	-462	TSS	TRUE
Ipo7	23155.9	15314.4	33686.3	-0.5923	6.16614e-15		0.536459	1.46564e-12	DN_reversed	5.94195e-13	TRUE					Arid1a	3.65813	1.26542e-19	-831	TSS	TRUE
Ipo8	3361.18	1461.05	2088.21	-1.18604	3.25541e-36	Dn	-0.682201	1.94285e-13	DN_reversed	0.00399179	FALSE					Gm12974	20.7837	6.18277e-73	-2520	intergenic	TRUE
Ireb2	6318.49	3058.66	6958.76	-1.03299	1.63164e-25	Dn	0.136225	0.260477	DN_reversed	6.37435e-10	TRUE					Sh3bgrl3	2.47299	7.96845e-33	1788	TSS	TRUE
Irf1	1407.3	3719.71	1999.91	1.38768	1.65469e-57	Up	0.50118	2.7802e-08	UP_reversed	1.0139e-15	FALSE					Cep85	3.89365	2.44804e-21	511	TSS	TRUE
Irgq	1269.63	632.806	856.57	-0.988283	9.07132e-16	Dn	-0.553814	4.85716e-06	DN_reversed	0.00178067	FALSE					Gm30191	2.6245	2.46985e-32	964	TSS	TRUE
Irx1	1620.91	798.442	1086.39	-0.996605	2.3863e-15	Dn	-0.560487	8.05542e-06	DN_reversed	0.00739042	TRUE					Pdik1l	5.19153	1.69152e-28	694	TSS	TRUE
Irx5	846.746	566.952	852.879	-0.554666	0.000252857		0.0154605	0.94792	DN_reversed	0.000107682	TRUE					Stmn1	4.52505	9.42248e-29	-220	TSS	TRUE
Isca1	1002.57	790.671	953.133	-0.342587	0.00317995		-0.0747762	0.608137	DN_reversed	0.0184729	FALSE					Mtfr1l	9.99721	3.63357e-82	86	TSS	TRUE
Isca2	507.213	675.283	451.833	0.398882	0.00224471		-0.167673	0.260489	UP_reversed	0.0113432	TRUE					Selenon	2.12453	6.34431e-12	6365	gene_body	TRUE
Isg15	601.811	1236.48	1210.47	1.01934	3.19611e-22	Up	0.991425	5.37081e-22	UP_reversed	0.0268342	FALSE					Man1c1	5.39323	1.80787e-32	189	TSS	TRUE
Isg20l2	4540.62	3406.14	5023.98	-0.413048	2.84289e-08		0.144492	0.0767848	DN_reversed	5.43859e-07	FALSE					Ldlrap1	2.95168	1.82864e-22	723	TSS	TRUE
Isoc1	1188.76	375.631	504.756	-1.6327	1.07987e-46	Dn	-1.22373	1.50585e-31	DN_reversed	0.00738965	FALSE					Tmem57	9.78993	3.81389e-185	444	TSS	TRUE
Isoc2a	433.932	575.822	405.931	0.397223	0.00311449		-0.0947662	0.579929	UP_reversed	0.00981184	TRUE					Rsrp1	2.94655	7.19466e-22	507	TSS	TRUE
Itch	3182.6	2041.36	3284.76	-0.631973	1.04123e-09	Dn	0.042809	0.779447	DN_reversed	0.00154048	FALSE					Syf2	8.11803	3.46694e-30	201	TSS	TRUE
Itga2b	239.527	825.004	708.789	1.74119	6.58258e-40	Up	1.52979	5.01921e-32	UP_reversed	0.00140624	FALSE					Clic4	5.77191	7.37567e-74	-486	TSS	TRUE
Itga5	7594.46	13548.8	12444.4	0.829833	5.47591e-32	Up	0.708535	8.91503e-24	UP_reversed	0.00731979	FALSE					Rcan3	2.05573	4.18685e-09	-1247	TSS	TRUE
Itga7	44.2435	174.836	131.039	1.82787	7.62068e-14	Up	1.44601	3.10611e-09	UP_reversed	0.0201471	FALSE					Srsf10	5.15645	6.84147e-37	552	TSS	TRUE
Itgav	10616.9	2305.53	3914.52	-2.17837	3.20479e-133	Dn	-1.4263	1.34052e-60	DN_reversed	2.00446e-09	TRUE					Fuca1	3.9755	3.23337e-20	164	TSS	TRUE
Itgb1	39611.9	22142.4	28818.1	-0.835045	3.51978e-42	Dn	-0.456738	2.11788e-13	DN_reversed	3.17091e-09	TRUE					Gale	3.53585	2.06051e-21	472	TSS	TRUE
Itgb5	2723.7	2265.11	1923.4	-0.263688	0.00410073		-0.495244	5.82049e-09	DN_reversed	0.0080492	TRUE					Gale	3.27394	1.94005e-19	4072	gene_body	TRUE
Itgb7	543.075	1655.91	1986.69	1.57772	2.0115e-43	Up	1.83769	9.61549e-61	UP_reversed	1.61184e-11	FALSE					Tceb3	4.20935	4.21606e-26	-37	TSS	TRUE
Itpkb	1198.92	651.811	965.031	-0.860171	6.49627e-16	Dn	-0.305656	0.00451645	DN_reversed	0.0212904	FALSE					Gm13009	2.04727	4.92985e-11	3271	intergenic	TRUE
Itpr1	1938.95	662.927	890.871	-1.51949	1.01754e-42	Dn	-1.11058	1.13964e-25	DN_reversed	0.00113933	FALSE					Gm26001	3.23594	3.35713e-27	-2096	intergenic	TRUE
Ivd	2915.59	3407.2	1839.26	0.221957	0.0115459		-0.662061	1.50586e-16	UP_reversed	0.0375066	TRUE					Id3	2.0484	1.38497e-33	4002	TSS	TRUE
Jade1	7466.22	3327.67	5895.07	-1.15363	3.22476e-41	Dn	-0.338733	0.000145347	DN_reversed	1.21879e-12	FALSE					Asap3	3.68318	1.32282e-15	-265	TSS	TRUE
Jade3	1829.31	1498.86	3081.5	-0.286157	0.0032168		0.743913	4.2487e-18	DN_reversed	0.00523826	FALSE					Zfp46	3.26778	1.6389e-26	-367	TSS	TRUE
Jak1	13901.3	10310.9	16670.2	-0.427864	3.90563e-08		0.259886	0.00124589	DN_reversed	1.12955e-05	FALSE					Zfp46	2.02214	5.5443e-10	4732	gene_body	TRUE
Jarid2	632.127	411.655	551.929	-0.615168	2.00474e-05	Dn	-0.187949	0.246091	DN_reversed	0.0319619	TRUE					Hnrnpr	5.9883	3.27009e-100	-268	TSS	TRUE
Jdp2	1707.69	2314.16	1954.51	0.435075	2.02806e-06		0.194891	0.0497405	UP_reversed	0.000802299	FALSE					6030445D17Rik	2.27649	1.48904e-13	-4850	intergenic	TRUE
Jmjd4	2031.43	1027.67	1264.22	-0.966378	4.28426e-21	Dn	-0.67982	1.11125e-11	DN_reversed	3.39735e-05	FALSE					Luzp1	3.71087	1.82281e-18	438	TSS	TRUE
Jtb	1725.21	2616.65	2087.67	0.596744	2.58612e-13		0.27318	0.00138446	UP_reversed	0.0349147	FALSE					Ephb2	4.74671	1.01049e-71	987	TSS	TRUE
Jun	5196.81	40072	26011.3	2.92884	0	Up	2.30919	1.34867e-246	UP_reversed	9.21581e-13	FALSE					Epha8	2.18886	2.34732e-12	-7084	intergenic	TRUE
Junb_v2	966.08	12040.9	8149.16	3.59149	1.46228e-274	Up	3.0356	2.03805e-196	UP_reversed	1.32561e-12	TRUE					Gm13003	2.34091	1.24089e-14	65	TSS	TRUE
Kank3	199.59	490.711	317.316	1.26004	1.68201e-16	Up	0.647634	4.19207e-05	UP_reversed	0.000485012	TRUE					Cdc42	3.23796	2.47084e-18	319	TSS	TRUE
Kansl1	4319.9	3385.49	5048.83	-0.349071	7.11247e-06		0.223808	0.00464631	DN_reversed	4.13268e-05	TRUE					2810405F17Rik	2.51534	4.0573e-15	-318	TSS	TRUE
Kansl2	2996.79	2458.46	2791.38	-0.28275	0.00119289		-0.0997496	0.323612	DN_reversed	0.0343421	FALSE					1700013G24Rik	3.99888	2.35338e-17	-4984	intergenic	TRUE
Kat6a	4393.1	2531.8	4432.47	-0.777403	2.32287e-09	Dn	0.0111101	0.959028	DN_reversed	0.000390143	FALSE					Hspg2	2.00901	9.89615e-37	-3069	TSS	TRUE
Katnbl1	1743.74	1450.4	2213.56	-0.263847	0.0186786		0.336615	0.00120038	DN_reversed	0.0178967	TRUE					Mir7018	2.14852	2.56714e-11	-7986	gene_body	TRUE
Kbtbd8	766.008	319.361	487.267	-1.21846	1.58141e-14	Dn	-0.645013	3.48444e-05	DN_reversed	1.43574e-05	TRUE					Hp1bp3	2.38161	2.81297e-12	803	TSS	TRUE
Kcnh2	267.217	443.464	362.291	0.71927	6.32277e-06	Up	0.438883	0.00746677	UP_reversed	0.0100061	FALSE					Kif17	2.11509	6.53206e-21	2464	TSS	TRUE
Kcnq1ot1	1135.64	610.64	1007.15	-0.860474	9.54573e-07	Dn	-0.171156	0.435909	DN_reversed	0.00258491	FALSE					Ddost	19.7839	1.72956e-84	-30	TSS	TRUE
Kctd10	6040.15	3268.88	4299.85	-0.87917	3.29185e-36	Dn	-0.486949	2.33857e-12	DN_reversed	3.27282e-09	FALSE					Pink1	4.24693	8.35498e-35	1106	TSS	TRUE
Kctd11	405.753	723.437	664.019	0.818023	7.55072e-10	Up	0.698075	1.04178e-07	UP_reversed	0.0268342	FALSE					Cda	2.08076	1.3298e-09	191	TSS	TRUE
Kdelr2	10546.7	6711.45	7172.86	-0.645401	1.53776e-13	Dn	-0.549731	3.34778e-10	DN_reversed	0.0228052	FALSE					Mul1	2.55568	6.35412e-09	-171	TSS	TRUE
Kdm1b	1327	657.447	1366.46	-0.997121	3.84393e-20	Dn	0.0387102	0.80472	DN_reversed	2.89267e-12	TRUE					Camk2n1	2.34294	1.00044e-15	-6314	intergenic	TRUE
Kdm2a	9353.35	6426.36	8920.05	-0.537283	1.97058e-11		-0.0683353	0.522788	DN_reversed	0.00639968	TRUE					Otud3	2.17809	1.022e-10	844	TSS	TRUE
Kdm2b	2459.04	1277.26	2444.85	-0.931828	1.13343e-21	Dn	-0.0092625	0.954398	DN_reversed	1.51244e-11	TRUE					Minos1	3.45167	2.45037e-20	12	TSS	TRUE
Kdm3b	2882.31	2241.54	2977.91	-0.356532	0.00221523		0.0453075	0.781356	DN_reversed	0.0279473	TRUE					Capzb	2.52561	1.61798e-26	700	TSS	TRUE
Kdm4c	3309.12	2072.82	2573.66	-0.665728	1.78066e-13	Dn	-0.361085	8.23863e-05	DN_reversed	0.00833839	FALSE					Pqlc2	2.45968	3.98518e-27	884	TSS	TRUE
Kdm5a	3515.28	2862.86	5475.2	-0.290737	0.0168641		0.628112	1.12151e-08	DN_reversed	0.0189212	FALSE					2700016F22Rik	2.3775	3.4516e-09	-221	TSS	TRUE
Kdm5c	8803.03	5737.09	7267.52	-0.613576	2.33876e-17	Dn	-0.275336	0.000242893	DN_reversed	0.0028304	TRUE					Aldh4a1	2.54315	7.90809e-10	-66	TSS	TRUE
Khdrbs1	17789.6	15363.3	23668.1	-0.2101	0.00372401		0.409906	1.26006e-09	DN_reversed	0.00871145	TRUE					Pax7	3.30216	3.82574e-21	1227	TSS	TRUE
Khsrp	11008.7	9717.82	10736.4	-0.178725	0.0183835		-0.0356845	0.723663	DN_reversed	0.0283718	FALSE					Rcc2	3.45298	1.5224e-25	-341	TSS	TRUE
Kif13a	2001.54	1422.15	2013.36	-0.486956	9.74883e-07		0.0075232	0.962546	DN_reversed	0.00124547	TRUE					Mfap2	2.14956	6.50656e-87	1481	TSS	TRUE
Kif15	2998.08	2221.28	2436.03	-0.426421	0.00026374		-0.297481	0.0131526	DN_reversed	0.0127706	FALSE					Crocc	11.8627	4.2721e-85	-150	TSS	TRUE
Kif1b	6575.58	3737.24	6987.42	-0.803402	7.16171e-15	Dn	0.0854067	0.54052	DN_reversed	1.11476e-08	TRUE					Szrd1	3.6456	2.27365e-25	574	TSS	TRUE
Kif1c	13304	9759.77	11216.7	-0.443899	4.00796e-11		-0.244249	0.000449657	DN_reversed	0.0130977	FALSE					Fbxo42	2.61581	1.6289e-14	86	TSS	TRUE
Kif20b	7274.11	2505.69	4722.92	-1.51619	3.89918e-50	Dn	-0.616389	2.14553e-09	DN_reversed	3.00281e-07	TRUE					Arhgef19	2.51954	7.00104e-36	3430	TSS	TRUE
Kif21a	4159.39	2292.38	3219.14	-0.847489	6.29491e-16	Dn	-0.366483	0.000774999	DN_reversed	0.00350376	TRUE					Gm13056	3.74164	6.86672e-18	9060	intergenic	TRUE
Kif5b	9036.56	6948.33	13334.6	-0.374526	0.00029746		0.553673	2.40219e-08	DN_reversed	0.00047573	TRUE					Epha2	2.11929	1.7649e-15	-9440	intergenic	TRUE
Kirrel	15460.5	5023.52	6363.57	-1.59863	2.08849e-55	Dn	-1.26401	1.66256e-35	DN_reversed	0.0388187	TRUE					Epha2	2.57823	8.3031e-37	1859	TSS	TRUE
Kitl	9600.71	5246.26	14930.8	-0.860792	3.2247e-18	Dn	0.628465	2.26943e-10	DN_reversed	2.08354e-09	TRUE					Hspb7	2.51272	1.18164e-33	3020	TSS	TRUE
Klc4	324.685	973.652	1003.5	1.54514	7.28536e-39	Up	1.59196	3.55222e-43	UP_reversed	0.0073007	FALSE					Zbtb17	2.2216	9.32045e-10	-84	TSS	TRUE
Klf2	301.218	632.103	231.221	1.03172	4.17471e-09	Up	-0.343139	0.0924516	UP_reversed	3.10172e-06	TRUE					Spen	2.41753	1.78484e-12	8296	gene_body	TRUE
Klf3	5887.88	2663.83	5804.77	-1.13522	4.74976e-48	Dn	-0.0207912	0.865608	DN_reversed	4.95439e-25	FALSE					Spen	4.32628	6.68722e-35	996	TSS	TRUE
Klf6	6589.32	10863.7	7867.08	0.716065	1.9831e-25	Up	0.253918	0.000490099	UP_reversed	0.00264379	TRUE					B330016D10Rik	2.10468	5.75203e-18	810	TSS	TRUE
Klhdc4	1175.88	2014.05	1566.84	0.767228	5.33522e-18	Up	0.410577	5.97048e-06	UP_reversed	0.0435474	TRUE					Fblim1	2.2691	1.08422e-24	4151	gene_body	TRUE
Klhl18	1058.82	662.162	905.789	-0.667918	1.193e-08	Dn	-0.223734	0.0750288	DN_reversed	0.013428	FALSE					AI507597	2.05892	1.22722e-29	373	TSS	TRUE
Klhl42	2959.18	1644.12	2144.9	-0.835954	1.70107e-16	Dn	-0.460892	6.45734e-06	DN_reversed	0.0380996	FALSE					Ddi2	3.71087	1.82281e-18	518	TSS	TRUE
Klhl7	2555.46	1540.92	2566.46	-0.720306	2.93269e-12	Dn	0.00267659	0.987975	DN_reversed	0.000489506	FALSE					Dnajc16	2.94326	7.65797e-34	-1009	TSS	TRUE
Klhl9	7491.68	5187.96	7077.55	-0.524613	5.24668e-08		-0.0822235	0.518265	DN_reversed	0.00735911	FALSE					Efhd2	2.25943	9.79466e-10	7419	gene_body	TRUE
Kmt2c	1929.82	1291.84	2057.18	-0.560263	0.000492695		0.0872736	0.69192	DN_reversed	0.000475077	TRUE					Efhd2	2.35802	2.83441e-16	3719	gene_body	TRUE
Kmt2e	3462	1805.18	2944.85	-0.91542	1.74454e-11	Dn	-0.229678	0.145138	DN_reversed	0.0110008	TRUE					Efhd2	3.40757	6.62677e-17	-80	TSS	TRUE
Kmt5a	9231.11	6400.55	7313.48	-0.524993	7.56738e-16		-0.334161	3.72033e-07	DN_reversed	0.000499978	FALSE					Gm13039	3.22959	3.98597e-20	-4303	gene_body	TRUE
Knl1	3851.97	1315.13	2115.44	-1.44525	6.01708e-11	Dn	-0.809267	0.00041456	DN_reversed	0.0265353	FALSE					Pdpn	2.43951	7.33999e-15	463	TSS	TRUE
Knop1	5249.66	3905.25	6233.14	-0.423812	4.72069e-07		0.24488	0.00482445	DN_reversed	2.52466e-06	FALSE					Pramef8	5.66643	3.1475e-29	73	TSS	TRUE
Kpna1	3440.79	2522.91	4698.08	-0.444039	1.52152e-06		0.443315	7.77719e-07	DN_reversed	6.21176e-06	FALSE					Dhrs3	2.33221	5.24407e-21	-777	TSS	TRUE
Kpna3	4732.03	2683.29	5089.21	-0.813512	8.17277e-21	Dn	0.102903	0.341912	DN_reversed	4.76775e-16	FALSE					Vps13d	2.36776	1.51644e-11	-595	TSS	TRUE
Kpna4	9546.82	4965.9	10117.4	-0.936524	4.28207e-38	Dn	0.0823141	0.374987	DN_reversed	2.96442e-24	TRUE					Tnfrsf1b	2.20211	1.93639e-13	269	TSS	TRUE
Kpna6	12963.4	7609.19	9471.06	-0.761716	2.43749e-20	Dn	-0.449725	8.20443e-08	DN_reversed	8.36789e-06	TRUE					Gm13034	2.10468	3.04718e-08	-1052	intergenic	TRUE
Kpnb1	71514.3	35842.7	51135.7	-0.992116	9.69167e-66	Dn	-0.481802	2.62343e-16	DN_reversed	1.36901e-11	TRUE					Fv1	4.13235	2.13151e-47	-79	TSS	TRUE
Kras	3209.9	2344.06	3664.07	-0.451205	4.415e-07		0.187071	0.0512848	DN_reversed	3.18162e-06	FALSE					Mfn2	2.87845	7.69703e-18	603	TSS	TRUE
Kremen1	1798.49	919.014	1232.4	-0.953153	2.28049e-24	Dn	-0.540283	2.46191e-09	DN_reversed	0.0173827	FALSE					Plod1	2.65189	3.16064e-11	666	TSS	TRUE
Krit1	2751.28	1767.05	2755.68	-0.63179	1.60796e-09	Dn	-0.000162285	0.999667	DN_reversed	0.0104125	FALSE					Mthfr	2.05239	2.49439e-29	1208	TSS	TRUE
Krtcap2	3935.93	6066.86	4248.24	0.615138	1.70902e-08	Up	0.110368	0.432725	UP_reversed	0.00789997	FALSE					Agtrap	2.60106	8.84371e-21	930	TSS	TRUE
Ktn1	4950.23	3615.94	4996.72	-0.448549	3.32124e-06		0.0115628	0.941779	DN_reversed	0.00594301	TRUE					Mir7022	3.99011	2.76581e-51	7695	gene_body	TRUE
Kxd1	3759.1	6948.67	4272.96	0.868493	7.06164e-12	Up	0.182944	0.234803	UP_reversed	0.000653034	TRUE					Fbxo6	2.20034	7.32982e-09	-565	TSS	TRUE
L2hgdh	1841.4	1288.18	1901.6	-0.508292	2.42694e-06		0.0412093	0.791131	DN_reversed	3.79132e-05	TRUE					Ubiad1	3.45768	1.20811e-22	-129	TSS	TRUE
L3hypdh	1279.39	837.981	905.885	-0.597547	1.73034e-08		-0.494221	1.60791e-06	DN_reversed	0.0469481	TRUE					Mtor	5.38924	5.99628e-65	-311	TSS	TRUE
L3mbtl3	4444.93	2014.39	3270.68	-1.13108	3.68685e-47	Dn	-0.44026	1.59034e-08	DN_reversed	4.13955e-07	TRUE					Srm	3.48516	1.62384e-72	2196	TSS	TRUE
Lactb	1333.68	825.485	879.81	-0.678268	1.0404e-09	Dn	-0.586447	5.87617e-08	DN_reversed	0.0336814	TRUE					Tardbp	3.69392	2.54217e-44	-781	TSS	TRUE
Lamp2	7744.19	4528.98	9702.27	-0.768747	5.78479e-24	Dn	0.322247	3.60101e-05	DN_reversed	6.88727e-10	FALSE					Casz1	2.04025	6.48862e-10	1070	TSS	TRUE
Lamtor2	1117.1	1441.1	924.828	0.35791	0.00645002		-0.263046	0.0537604	UP_reversed	0.0125692	FALSE					Pex14	3.48081	1.84068e-21	875	TSS	TRUE
Lamtor4	1095.13	1498.38	1051.9	0.447747	5.13985e-06		-0.0540397	0.697786	UP_reversed	0.000339163	FALSE					Dffa	2.36776	2.29272e-09	653	TSS	TRUE
Lamtor5	1882.59	2916.44	2524.76	0.625004	6.38274e-12	Up	0.420762	5.0187e-06	UP_reversed	0.00694955	TRUE					Apitd1	3.05836	1.86481e-19	347	TSS	TRUE
Larp1	20484.4	14052.7	17092.3	-0.54008	1.59526e-13		-0.259786	0.000707249	DN_reversed	7.93391e-06	TRUE					Pgd	4.69504	1.64413e-58	506	TSS	TRUE
Larp4	6807.08	3784.38	7757.93	-0.832678	1.7816e-13	Dn	0.184323	0.165551	DN_reversed	1.09737e-10	FALSE					Kif1b	5.52477	2.20319e-106	91	TSS	TRUE
Larp4b	4920.68	3921.09	5132.7	-0.325125	0.000225438		0.0590629	0.61324	DN_reversed	0.000572896	TRUE					Ube4b	4.0387	6.09058e-41	48	TSS	TRUE
Lats1	5099.21	4204.87	6077.36	-0.274808	0.0167986		0.248457	0.0299514	DN_reversed	0.019465	FALSE					Ctnnbip1	2.02373	1.54589e-16	1863	TSS	TRUE
Lats2	5823.98	3025.36	4173.66	-0.929044	3.65703e-16	Dn	-0.474279	5.36188e-05	DN_reversed	1.20335e-07	TRUE					Clstn1	2.37487	4.12215e-22	931	TSS	TRUE
Lbr	4138.54	1951.47	2634.35	-1.07073	5.2143e-30	Dn	-0.646985	4.28835e-12	DN_reversed	0.000515056	TRUE					Slc25a33	2.45545	1.65525e-14	-723	TSS	TRUE
Lcor	800.001	269.868	820.924	-1.32562	4.02709e-05	Dn	0.0302522	0.954398	DN_reversed	0.0168211	TRUE					Gm13073	2.04929	2.08678e-11	1713	TSS	TRUE
Ldlr	11793.8	2856.07	3467.2	-2.03215	2.07807e-169	Dn	-1.75347	9.54623e-133	DN_reversed	0.0204993	TRUE					Gm13070	2.67132	8.29104e-12	-9406	intergenic	TRUE
Ldlrad3	1535.76	882.843	1476.56	-0.790919	5.18413e-15	Dn	-0.0559518	0.689942	DN_reversed	0.00076079	TRUE					Gm13070	2.4714	3.31494e-22	-4906	gene_body	TRUE
Lfng	799.155	298.698	344.579	-1.37961	2.68686e-22	Dn	-1.17395	2.41264e-18	DN_reversed	0.00693241	FALSE					Gm13094	2.25501	6.41034e-10	3164	intergenic	TRUE
Lgals1	107662	146489	104770	0.439857	9.8258e-07		-0.0388277	0.770893	UP_reversed	0.00146425	FALSE					Eno1	2.2414	2.30719e-60	6847	TSS	TRUE
Lgals3	16741.5	47945.5	38968.7	1.49561	1.40441e-46	Up	1.20109	2.15431e-30	UP_reversed	7.36613e-09	FALSE					Rere	2.87369	5.25593e-14	-46	TSS	TRUE
Lgalsl	3420.05	2213.52	3061.36	-0.622113	5.14544e-13	Dn	-0.160677	0.0964313	DN_reversed	0.000192898	FALSE					Gm13091	3.25724	2.3751e-15	-856	gene_body	TRUE
Lgr4	3011.08	1638.48	2704.76	-0.871724	1.74453e-25	Dn	-0.154392	0.0985675	DN_reversed	4.60434e-13	TRUE					Park7	2.21354	1.59939e-14	5236	gene_body	TRUE
Lhfp	5494.44	4589.39	6312.19	-0.2585	0.00226359		0.199162	0.020164	DN_reversed	0.0049024	FALSE					Park7	4.87193	4.21639e-44	436	TSS	TRUE
Lig4	711.237	574.101	923.725	-0.306269	0.0171933		0.365773	0.00159256	DN_reversed	0.0260784	FALSE					Per3	4.30502	1.67541e-28	164	TSS	TRUE
Limd2	895.398	1269.85	987.184	0.496985	5.112e-05		0.143962	0.328989	UP_reversed	0.0280247	FALSE					Vamp3	4.05345	1.35922e-30	-147	TSS	TRUE
Lims1	7061.57	3585.51	5180.59	-0.965149	2.27135e-22	Dn	-0.44287	1.41481e-05	DN_reversed	0.0023782	TRUE					Camta1	10.5968	4.37844e-274	-31	TSS	TRUE
Lin37	394.859	788.543	456.818	0.972334	1.7387e-12	Up	0.212481	0.199646	UP_reversed	0.00906749	TRUE					Phf13	2.50486	1.21531e-24	-1942	TSS	TRUE
Lin54	2938.1	2171.82	3406.15	-0.431435	1.7526e-06		0.20906	0.0273562	DN_reversed	1.06063e-05	FALSE					Nol9	2.13261	8.31214e-24	363	TSS	TRUE
Lman1	6712.04	2392.49	2885.39	-1.47184	1.06305e-60	Dn	-1.20753	8.70015e-43	DN_reversed	0.00502025	FALSE					Tnfrsf25	2.01637	9.61433e-25	1965	TSS	TRUE
Lman2	9522.08	6446.34	6503.1	-0.557941	3.14113e-12		-0.544767	7.18339e-12	DN_reversed	0.0388547	FALSE					Acot7	2.77044	1.08482e-22	565	TSS	TRUE
Lmbrd2	1971.07	728.844	1667.03	-1.38944	4.10685e-20	Dn	-0.23814	0.177218	DN_reversed	1.52282e-06	FALSE					Acot7	3.26588	1.24332e-20	6665	gene_body	TRUE
Lmna	56801.5	69651.2	57150.1	0.292252	0.000138219		0.0088687	0.943508	UP_reversed	0.0184633	FALSE					Gpr153	2.36024	1.20484e-20	667	TSS	TRUE
Lmnb1	8269.57	4020.74	5672.7	-1.03384	3.35761e-50	Dn	-0.540251	5.13569e-15	DN_reversed	3.18316e-11	TRUE					Rpl22	3.82668	1.78901e-22	-467	TSS	TRUE
Lnpep	3443.33	1630.87	5835.45	-1.00757	5.46024e-06	Dn	0.713991	0.00167856	DN_reversed	9.66263e-12	TRUE					Kcnab2	4.54167	2.13839e-53	370	TSS	TRUE
Lnpk1	2067.14	1261.45	2705.56	-0.704199	3.49863e-14	Dn	0.381667	2.85556e-05	DN_reversed	5.14044e-10	TRUE					A430005L14Rik	4.09242	2.04464e-21	262	TSS	TRUE
Lockd	374.279	704.276	394.621	0.889523	5.58444e-12	Up	0.073077	0.700666	UP_reversed	1.044e-05	TRUE					Cep104	3.98781	2.28896e-21	5	TSS	TRUE
Lox	64645.3	7424.78	10153.5	-3.09135	8.45894e-289	Dn	-2.64448	1.50082e-214	DN_reversed	2.58743e-13	TRUE					Tprgl	15.5596	1.52371e-163	-34	TSS	TRUE
Loxl1	8986.43	3044.61	2500.47	-1.54452	7.21801e-68	Dn	-1.82333	4.44452e-96	DN_reversed	0.0346108	FALSE					Prdm16	2.08873	1.02397e-13	965	TSS	TRUE
Lpcat1	2463.58	1888.09	2218.1	-0.380079	4.41357e-06		-0.149296	0.0973185	DN_reversed	0.0120413	FALSE					Gm13111	2.41559	1.77242e-14	3223	gene_body	TRUE
Lpgat1	5697.34	3171.49	5310.91	-0.833345	8.52769e-17	Dn	-0.101421	0.434689	DN_reversed	1.22402e-09	FALSE					Fam213b	4.82837	5.62739e-28	-5662	intergenic	TRUE
Lpin3	159.36	225.262	185.936	0.470484	0.0199186		0.212183	0.347036	UP_reversed	0.0339909	FALSE					Gm20421	2.00987	2.27837e-19	-222	TSS	TRUE
Lpl	1089.68	358.878	373.664	-1.54951	2.92732e-29	Dn	-1.51512	1.57165e-30	DN_reversed	0.00264445	FALSE					Rer1	2.52098	1.17338e-31	1172	TSS	TRUE
Lrch2	1644.58	697.371	1170.01	-1.21295	1.30874e-22	Dn	-0.487948	8.8188e-05	DN_reversed	0.00218365	FALSE					Ski	2.14515	2.98444e-17	-2808	intergenic	TRUE
Lrif1	1402.42	725.38	1652.75	-0.939299	2.55551e-19	Dn	0.230297	0.0345934	DN_reversed	2.83066e-08	FALSE					Faap20	2.36776	1.51644e-11	-3766	intergenic	TRUE
Lrig1	4618.04	6176.5	5806.45	0.415678	1.78856e-06		0.326347	0.000213064	UP_reversed	0.0473446	TRUE					Gnb1	2.10468	1.33191e-11	-9661	intergenic	TRUE
Lrp12	2015.93	1546.07	2912.6	-0.380147	3.88321e-05		0.524638	1.02567e-09	DN_reversed	0.000148702	TRUE					Gnb1	2.17908	1.66237e-22	438	TSS	TRUE
Lrp6	4474.61	3074.73	4766.83	-0.534133	1.94483e-07		0.0886878	0.50714	DN_reversed	7.04122e-05	FALSE					Nadk	3.65549	5.57518e-34	1221	TSS	TRUE
Lrpprc	10750.9	6811.03	8267.71	-0.654142	9.78166e-19	Dn	-0.376874	5.55934e-07	DN_reversed	0.0156466	TRUE					Slc35e2	7.22605	2.92544e-51	483	TSS	TRUE
Lrrc40	2743.19	1728.37	2556.53	-0.659291	2.48013e-12	Dn	-0.103302	0.377006	DN_reversed	2.65901e-05	FALSE					Gm16023	3.15701	3.99904e-19	154	TSS	TRUE
Lrrc41	4637.96	2447.54	3033.17	-0.91357	3.85892e-25	Dn	-0.607521	4.14773e-12	DN_reversed	8.82691e-05	FALSE					Mib2	3.08984	2.01728e-28	-702	TSS	TRUE
Lrrc47	1889.16	1556.72	2007.23	-0.274285	0.00542647		0.0898263	0.437858	DN_reversed	0.0103084	FALSE					Ssu72	2.50286	1.22638e-13	199	TSS	TRUE
Lrrc59	31889.6	21630.9	22320.5	-0.556248	9.7458e-15		-0.511061	1.20598e-12	DN_reversed	6.07931e-05	FALSE					Gm26840	2.58301	3.09929e-17	530	TSS	TRUE
Lrrc75a	299.807	535.831	382.617	0.821717	2.47339e-09	Up	0.346227	0.0192018	UP_reversed	0.014308	FALSE					Tmem88b	2.3423	6.6061e-10	1173	gene_body	TRUE
Lrrc8b	1880.87	926.734	1380.07	-1.00544	2.03112e-20	Dn	-0.44443	4.35271e-05	DN_reversed	0.00979252	FALSE					Mrpl20	2.60579	6.65337e-17	1649	TSS	TRUE
Lrrc8c	3409.53	2509.4	3395.33	-0.436114	4.98872e-08		-0.00557526	0.965937	DN_reversed	8.94613e-06	TRUE					Ccnl2	5.73524	6.30203e-45	110	TSS	TRUE
Lrrc8d	2578.02	2126.72	2785.42	-0.274949	0.00379856		0.11224	0.294981	DN_reversed	0.00726997	FALSE					Aurkaip1	2.16658	1.03784e-08	648	TSS	TRUE
Lrrcc1	5918.51	1576.23	2687.83	-1.87444	7.57045e-57	Dn	-1.12057	8.83882e-22	DN_reversed	1.3082e-07	TRUE					Mxra8os	2.15782	7.65862e-22	-1222	TSS	TRUE
Lrrk1	2932.82	1342.3	1365.99	-1.11157	2.15535e-26	Dn	-1.09099	1.49921e-26	DN_reversed	0.0363926	TRUE					Cptp	2.01447	1.50369e-18	339	TSS	TRUE
Lsm10	767.367	1199.13	712.557	0.633391	2.05637e-07	Up	-0.103285	0.524298	UP_reversed	0.0108621	FALSE					Sdf4	3.8013	3.63399e-47	988	TSS	TRUE
Ltn1	4378.57	2397.98	3683.05	-0.856144	1.09591e-16	Dn	-0.248161	0.0278901	DN_reversed	0.00162663	TRUE					Mir200a	2.08228	3.648e-10	7684	gene_body	TRUE
Luc7l2	8075.18	6292.65	7735.9	-0.356726	9.31322e-05		-0.0622631	0.611175	DN_reversed	0.0278083	TRUE					9430015G10Rik	2.10468	3.15515e-11	-382	TSS	TRUE
Luzp1	5392.09	4277.14	6114.86	-0.328014	0.00842767		0.177491	0.192627	DN_reversed	0.00905624	TRUE					Agrn	2.00182	1.40939e-22	2587	TSS	TRUE
Ly75	5046.08	1714.63	2292.37	-1.52895	5.9344e-38	Dn	-1.12028	1.71651e-21	DN_reversed	0.0338869	TRUE					AW011738	2.22704	2.13807e-11	695	TSS	TRUE
Lypla1	3347.32	870.309	1751.13	-1.91402	7.12678e-87	Dn	-0.927859	6.60019e-24	DN_reversed	2.48237e-14	FALSE					Cdk6	2.44783	2.06379e-43	606	TSS	TRUE
Lypla2	1464.28	1874.05	1637.68	0.351357	0.00230579		0.16309	0.204434	UP_reversed	0.0360075	FALSE					Pex1	2.73608	2.07203e-22	-166	TSS	TRUE
Lysmd3	741.484	494.789	1092.02	-0.563396	0.00079663		0.535309	0.000857919	DN_reversed	0.000778127	FALSE					Ankib1	2.9255	1.97974e-26	224	TSS	TRUE
M6pr	7590.93	5986.36	7160.9	-0.340746	1.81888e-06		-0.0837168	0.335331	DN_reversed	0.00398553	TRUE					Cyp51	4.64782	2.28203e-87	945	TSS	TRUE
M6pr-ps	361.085	242.78	343.148	-0.562005	0.000358297		-0.0750471	0.713396	DN_reversed	0.0154286	FALSE					Fzd1	2.60874	6.46991e-45	1834	TSS	TRUE
Mad2l1	6380.47	4098.52	4441.18	-0.632724	5.22141e-17	Dn	-0.519015	4.38329e-12	DN_reversed	0.0427626	TRUE					Cldn12	2.90367	6.85836e-28	111	TSS	TRUE
Mad2l2	945.965	1726.69	1341.18	0.853903	5.18071e-15	Up	0.499719	7.47639e-06	UP_reversed	0.0345556	FALSE					Gtpbp10	2.66843	1.50935e-12	637	TSS	TRUE
Magea8	3124.07	2609.35	3525.95	-0.259036	0.00503236		0.171966	0.070736	DN_reversed	0.00628621	FALSE					Steap2	7.13251	7.43746e-31	477	TSS	TRUE
Magee1	895.465	375.368	471.871	-1.2255	7.18616e-19	Dn	-0.910052	5.80426e-12	DN_reversed	0.0188213	FALSE					Steap1	2.47809	2.01669e-11	-974	TSS	TRUE
Magi3	4248.37	1781.31	3304.03	-1.23194	1.77558e-28	Dn	-0.358691	0.00225349	DN_reversed	3.30291e-06	TRUE					Slc25a40	3.71241	2.23614e-33	349	TSS	TRUE
Malsu1	609.83	884.056	550.852	0.530112	0.000305241		-0.134888	0.465974	UP_reversed	0.0397628	FALSE					Abcb1b	3.20485	1.92361e-15	113	TSS	TRUE
Mamdc4	1490.35	1902.75	1503.82	0.350151	0.00169206		0.0154333	0.929589	UP_reversed	0.0228536	FALSE					Gm37153	5.69042	3.69104e-59	-59	TSS	TRUE
Man1a	2485.22	1502.23	2812.63	-0.718859	3.35404e-16	Dn	0.177891	0.0634651	DN_reversed	5.04605e-14	TRUE					Tmem243	2.3792	1.84796e-14	531	TSS	TRUE
Man1a2	6359.59	1985.79	3922.55	-1.65789	2.10104e-72	Dn	-0.691246	3.93879e-14	DN_reversed	1.05432e-13	TRUE					Dnd1-ps	2.15864	1.22283e-09	-319	TSS	TRUE
Man1c1	424.425	224.078	325.82	-0.886541	4.3075e-09	Dn	-0.367592	0.0136591	DN_reversed	0.0397668	TRUE					Phtf2	19.1926	0	23	TSS	TRUE
Man2a1	10555.9	2288.03	5880.05	-2.17146	2.4e-93	Dn	-0.832822	4.34545e-15	DN_reversed	3.65962e-06	TRUE					A630072M18Rik	5.78786	1.87129e-54	1010	gene_body	TRUE
Manea	1256.74	424.051	770.406	-1.5335	3.03366e-32	Dn	-0.699591	1.91674e-08	DN_reversed	0.0234756	TRUE					Ptpn12	2.50557	2.73005e-15	310	TSS	TRUE
Manf	7888.58	13825.8	10105.7	0.803606	1.03535e-25	Up	0.355506	8.13069e-06	UP_reversed	0.0368375	TRUE					Ccdc146	5.09553	2.29479e-34	-123	TSS	TRUE
Map1lc3b	2481.46	6866.16	6065.53	1.45082	6.07304e-55	Up	1.27566	4.71961e-43	UP_reversed	0.0140685	FALSE					Armc10	3.26588	1.24332e-20	20	TSS	TRUE
Map2k4	4701.95	3215.53	4450.95	-0.544985	4.69051e-13		-0.0784534	0.410684	DN_reversed	0.000310317	TRUE					Napepld	3.28587	4.20181e-34	-406	TSS	TRUE
Map3k10	1604.55	893.625	1178.82	-0.824385	1.50517e-12	Dn	-0.434075	0.000216231	DN_reversed	0.0160466	TRUE					Psmc2	3.9665	4.70004e-15	1416	gene_body	TRUE
Map3k3	4157.08	2993.44	4624.75	-0.467493	1.72941e-07		0.151765	0.13258	DN_reversed	2.45808e-05	TRUE					Kmt2e	4.80662	3.11326e-58	-241	TSS	TRUE
Map3k7	5642.47	3593.52	5298.79	-0.646288	2.80921e-16	Dn	-0.0912295	0.357045	DN_reversed	0.00023281	TRUE					Gm43566	4.4098	1.29299e-28	-254	TSS	TRUE
Map3k8	83.0758	263.432	253.659	1.55755	1.26637e-14	Up	1.51065	1.89486e-14	UP_reversed	0.0169401	TRUE					2700038G22Rik	3.47271	2.31413e-24	-397	TSS	TRUE
Map4k3	1680.03	1344.34	2754.87	-0.320061	0.000501617		0.705923	7.25144e-18	DN_reversed	0.00145787	FALSE					Fam126a	6.94543	3.11817e-63	-388	TSS	TRUE
Map4k4	15137.9	12593.1	18633.7	-0.264364	5.04429e-05		0.298156	2.92702e-06	DN_reversed	0.000374541	FALSE					Nupl2	2.89393	2.31881e-11	436	TSS	TRUE
Map4k5	2438.6	1576.81	2376.93	-0.622926	6.30951e-12	Dn	-0.0388724	0.768731	DN_reversed	0.00172945	FALSE					Gm9836	2.47948	1.34635e-24	7977	intergenic	TRUE
Map6	3784.87	2985.29	3036.73	-0.340132	1.34029e-05		-0.314597	4.2774e-05	DN_reversed	0.0318974	FALSE					Atg9b	2.18062	3.92527e-22	4142	gene_body	TRUE
Mapk1	13324.5	10047.7	12775.6	-0.404726	1.44983e-09		-0.0604281	0.491945	DN_reversed	2.87548e-05	TRUE					Abcb8	2.03992	1.35689e-12	-376	TSS	TRUE
Mapk11	615.165	879.604	674.965	0.508437	9.51344e-05		0.130747	0.415603	UP_reversed	0.00172788	FALSE					Fastk	2.19983	1.63704e-42	2093	TSS	TRUE
Mapk14	5996.88	3515.06	3259.12	-0.76636	4.87602e-29	Dn	-0.874146	8.32896e-39	DN_reversed	4.83395e-05	TRUE					Agap3	2.43541	4.02781e-12	322	TSS	TRUE
Mapk1ip1	245.321	441.865	246.147	0.814787	1.25498e-06	Up	0.0122591	0.965203	UP_reversed	0.00264838	TRUE					Abcf2	3.93242	8.94969e-21	366	TSS	TRUE
Mapk1ip1l	4283.97	3170	4200.15	-0.431407	5.12137e-08		-0.0292854	0.802745	DN_reversed	7.52596e-07	TRUE					Nub1	4.34661	2.74667e-30	-32	TSS	TRUE
Mapk3	2118.17	3660.62	2940.24	0.776828	5.91677e-13	Up	0.468113	2.38829e-05	UP_reversed	0.000195503	TRUE					Wdr86	2.36776	1.86143e-10	1526	gene_body	TRUE
Mapk8	1963.14	1625.41	2235.77	-0.269463	0.0027732		0.184588	0.0411922	DN_reversed	0.00637052	TRUE					Crygn	2.51392	1.8174e-13	7007	gene_body	TRUE
Mapre1	9735.59	6611.44	8518.79	-0.555317	3.68493e-14		-0.19157	0.0158478	DN_reversed	0.000105919	TRUE					Rheb	4.04991	6.44528e-37	-276	TSS	TRUE
Mapre3	698.41	968.06	645.09	0.4655	4.65811e-05		-0.107017	0.459201	UP_reversed	0.0027446	FALSE					Prkag2os1	4.15924	1.7319e-25	5830	gene_body	TRUE
March10	23.9422	77.2732	41.5917	1.37285	0.00015575	Up	0.644267	0.109846	UP_reversed	0.0434191	FALSE					Prkag2	2.04621	8.4202e-08	41	TSS	TRUE
March3	198.065	126.108	187.996	-0.587639	0.0245187		-0.0694077	0.843916	DN_reversed	0.019449	TRUE					Kmt2c	4.50167	8.61917e-50	-155	TSS	TRUE
March6	5580.85	3190.83	5096.84	-0.801293	1.24208e-26	Dn	-0.130791	0.131323	DN_reversed	2.02858e-08	FALSE					1700096K18Rik	2.51392	4.36144e-31	-513	TSS	TRUE
March7	3085	1913.7	4352.56	-0.679605	1.06753e-10	Dn	0.487607	3.00769e-06	DN_reversed	9.98201e-10	FALSE					Paxip1	2.75612	1.89311e-19	549	TSS	TRUE
Marcks	3971.5	1313.18	2639.72	-1.57349	1.35119e-52	Dn	-0.579546	1.68127e-08	DN_reversed	1.13716e-07	TRUE					Insig1	2.90241	9.84286e-32	-63	TSS	TRUE
Mars2	2870.45	1563.76	2127.95	-0.860724	1.97552e-13	Dn	-0.427595	0.000381795	DN_reversed	0.000812484	TRUE					Rbm33	5.63752	4.84269e-31	-277	TSS	TRUE
Masp1	1201.38	93.2555	106.391	-3.53869	2.1433e-102	Dn	-3.41101	9.73879e-121	DN_reversed	0.00424248	FALSE					Lmbr1	2.61801	9.71779e-17	683	TSS	TRUE
Mast2	10638.9	7315.51	8953.4	-0.536502	2.21848e-14		-0.246876	0.000760294	DN_reversed	0.000657573	FALSE					Nom1	4.53594	4.67063e-41	935	TSS	TRUE
Matr3	15810.9	9585.1	19483.7	-0.715888	2.43779e-18	Dn	0.298225	0.000521347	DN_reversed	6.74989e-17	TRUE					Mnx1	2.01698	1.70109e-07	269	TSS	TRUE
Matr3-ps2	99.5471	54.7557	107.628	-0.738239	0.0165768		0.0819928	0.840783	DN_reversed	0.035891	FALSE					Ube3c	3.40757	6.62677e-17	357	TSS	TRUE
Max	2446.45	2061.6	3212.93	-0.24515	0.0349608		0.388893	0.00023597	DN_reversed	0.0370834	TRUE					Dnajb6	2.06201	1.38445e-14	466	TSS	TRUE
Mb21d1	1732.08	1242.21	2032.64	-0.469949	8.61933e-06		0.227397	0.0392668	DN_reversed	3.11948e-05	TRUE					Tyms	2.44142	3.26018e-09	580	TSS	TRUE
Mbnl1	21592	7546.63	14083.1	-1.49991	1.38393e-63	Dn	-0.610688	1.70911e-11	DN_reversed	1.27763e-11	FALSE					Hadhb	4.07209	1.41066e-26	51	TSS	TRUE
Mbnl2	4424.52	2741.51	5244.56	-0.684573	3.46051e-13	Dn	0.241518	0.0164971	DN_reversed	0.000118807	FALSE					Selenoi	3.56626	1.32441e-30	518	TSS	TRUE
Mboat1	369.604	264.528	403.04	-0.458597	0.00467596		0.121803	0.518312	DN_reversed	0.00890112	FALSE					Cenpa	3.93652	8.38064e-29	722	TSS	TRUE
Mbtps2	2770.33	1062	1857.15	-1.36668	7.87328e-43	Dn	-0.57389	4.50366e-09	DN_reversed	0.000193946	FALSE					Tmem214	2.41419	1.45553e-11	987	TSS	TRUE
Mcfd2	6306.64	5015.99	7419.21	-0.328488	1.00176e-05		0.232764	0.00199883	DN_reversed	6.96123e-05	FALSE					Agbl5	2.67294	3.98526e-21	-35	TSS	TRUE
[truncated: 14,771 more rows]
